# Supplementary material for: Meal Timing and Anthropometric and Metabolic Outcomes: A Systematic Review and Meta-Analysis
Source: PubMed Central journal article supplement (PMC11530941; doi:10.1001/jamanetworkopen.2024.42163), 2024-11-01
Supplement: jamanetwopen-e2442163-s001.pdf [file jamanetwopen-e2442163-s001.pdf]

## Supplemental Online Content

Liu HY, Eso A, Cook N, O'Neill H, Albarqouni L. Effect of meal timing on anthropometric and metabolic outcomes: a systematic review and meta-analysis. *JAMA Netw Open*. 2024;7(11):e2442163. doi:10.1001/jamanetworkopen.2024.42163

**eTable 1.** Search strategy and key concepts/MeSH

**eTable 2.** Notable studies excluded with reasoning

**eTable 3.** Included studies

**eTable 4.** Details of Intervention Delivery

**eTable 5.** Adherence outcomes

**eTable 6.** Hunger outcomes

**eTable 7.** Satiety outcomes

**eTable 8.** Notable clinical trials excluded

**eFigure 1.** Risk of summary for included studies

**eFigure 2.** Risk of bias graph for included studies

**eFigure 3.** Meta-analysis of difference in mean difference (95% CIs) for the effect of time-restricted eating on weight (kg), grouped by baseline BMI status

**eFigure 4.** Meta-analysis of difference in mean difference (95% CIs) for the effect of time-restricted eating interventions on weight (kg), grouped by eating window

**eFigure 5.** Meta-analysis of difference in mean difference (95% CIs) for the effect of meal timing interventions on BMI (kg/m<sup>2</sup>), grouped by intervention type

**eFigure 6.** Meta-analysis of difference in mean difference (95% CIs) for the effect of time-restricted eating on BMI (kg/m<sup>2</sup>), grouped by baseline BMI status

**eFigure 7.** Meta-analysis of difference in mean difference (95% CIs) for the effect of meal timing interventions on lean mass (kg), grouped by the nature of the meal timing intervention

**eFigure 8.** Meta-analysis of difference in mean difference (95% CIs) for the effect of meal timing interventions on waist circumference (cm), grouped by meal timing intervention

**eFigure 9.** Meta-analysis of difference in mean difference (95% CIs) for the effect of time-restricted eating on lean mass (kg), grouped by gender proportion

**eFigure 10.** Meta-analysis of difference in mean difference (95% CIs) for the effect of time-restricted eating on lean mass (kg), grouped by baseline BMI status

**eFigure 11.** Meta-analysis of difference in mean difference (95% CIs) for the effect of time-restricted eating on lean mass (kg), grouped by energy prescription

**eFigure 12.** Meta-analysis of difference in mean difference (95% CIs) for the effect of time-restricted eating on lean mass (kg), grouped by follow duration

**eFigure 13.** Meta-analysis of difference in mean difference (95% CIs) for the effect of time-restricted eating on lean mass (kg), grouped by health status

**eFigure 14.** Meta-analysis of difference in mean difference (95% CIs) for the effect of time-restricted eating on lean mass (kg), grouped by eating window

**eFigure 15.** Meta-analysis of difference in mean difference (95% CIs) for the effect of time-restricted eating on lean mass (kg), grouped by delivery personnel

**eFigure 16.** Meta-analysis of difference in mean difference (95% CIs) for the effect of time-restricted eating on lean mass (kg), grouped by frequency of contact

**eFigure 17.** Meta-analysis of difference in mean difference (95% CIs) for the effect of time-restricted eating on lean mass (kg), grouped by resource provision

**eFigure 18.** Meta-analysis of difference in mean difference (95% CIs) for the effect of time-restricted eating on lean mass (kg), grouped by risk of bias

**eFigure 19.** Meta-analysis of difference in mean difference (95% CIs) for the effect of time-restricted eating on waist circumference (cm), grouped by gender proportion

**eFigure 20.** Meta-analysis of difference in mean difference (95% CIs) for the effect of time-restricted eating on waist circumference (cm), grouped by baseline BMI status

**eFigure 21.** Meta-analysis of difference in mean difference (95% CIs) for the effect of time-restricted eating on waist circumference (cm), grouped by health status

**eFigure 22.** Meta-analysis of difference in mean difference (95% CIs) for the effect of time-restricted eating on waist circumference (cm), grouped by energy prescription

**eFigure 23.** Meta-analysis of difference in mean difference (95% CIs) for the effect of time-restricted eating on waist circumference (cm), grouped by follow duration

**eFigure 24.** Meta-analysis of difference in mean difference (95% CIs) for the effect of time-restricted eating on waist circumference (cm), grouped by eating window

**eFigure 25.** Meta-analysis of difference in mean difference (95% CIs) for the effect of time-restricted eating on waist circumference (cm), grouped by frequency of contact

**eFigure 26.** Meta-analysis of difference in mean difference (95% CIs) for the effect of time-restricted eating on waist circumference (cm), grouped by delivery personnel

**eFigure 27.** Meta-analysis of difference in mean difference (95% CIs) for the effect of time-restricted eating on waist circumference (cm), grouped by resource provision

**eFigure 28.** Meta-analysis of difference in mean difference (95% CIs) for the effect of time-restricted eating on waist circumference (cm), grouped by risk of bias

**eFigure 29.** Meta-analysis of difference in mean difference (95% CIs) for the effect of meal timing interventions on HbA1c (%), grouped by the meal timing intervention

**eFigure 30.** Meta-analysis of difference in mean difference (95% CIs) for the effect of meal timing interventions on fasting plasma glucose (mg/dL), grouped by the meal timing intervention

**eFigure 31.** Meta-analysis of difference in mean difference (95% CIs) for the effect of time-restricted eating on HbA1c (%), grouped by gender proportion

**eFigure 32.** Meta-analysis of difference in mean difference (95% CIs) for the effect of time-restricted eating on HbA1c (%), grouped by delivery personnel

**eFigure 33.** Meta-analysis of difference in mean difference (95% CIs) for the effect of meal timing interventions on LDL (mg/dL), grouped by the meal timing intervention

**eFigure 34.** Meta-analysis of difference in mean difference (95% CIs) for the effect of time-restricted eating on LDL (mg/dL), grouped by gender proportion

**eFigure 35.** Meta-analysis of difference in mean difference (95% CIs) for the effect of time-restricted eating on LDL (mg/dL), grouped by baseline BMI status

**eFigure 36.** Meta-analysis of difference in mean difference (95% CIs) for the effect of time-restricted eating on LDL (mg/dL), grouped by health status

**eFigure 37.** Meta-analysis of difference in mean difference (95% CIs) for the effect of time-restricted eating on LDL (mg/dL), grouped by energy prescription

**eFigure 38.** Meta-analysis of difference in mean difference (95% CIs) for the effect of time-restricted eating on LDL (mg/dL), grouped by follow duration

**eFigure 39.** Meta-analysis of difference in mean difference (95% CIs) for the effect of time-restricted eating on LDL (mg/dL), grouped by eating window

**eFigure 40.** Meta-analysis of difference in mean difference (95% CIs) for the effect of time-restricted eating on LDL (mg/dL), grouped by frequency of contact

**eFigure 41.** Meta-analysis of difference in mean difference (95% CIs) for the effect of time-restricted eating on LDL (mg/dL), grouped by delivery personnel

**eFigure 42.** Meta-analysis of difference in mean difference (95% CIs) for the effect of time-restricted eating on LDL (mg/dL), grouped by resource provision

**eFigure 43.** Meta-analysis of difference in mean difference (95% CIs) for the effect of time-restricted eating on LDL (mg/dL), grouped by risk of bias

**eFigure 44.** Meta-analysis of difference in mean difference (95% CIs) for the effect of meal timing interventions on energy intake (kcal/day), grouped by the meal timing intervention

**eFigure 45.** Meta-analysis of difference in mean difference (95% CIs) for the effect of time-restricted eating on energy intake (kcal/day), grouped by energy prescription

**eFigure 46.** Meta-analysis of difference in mean difference (95% CIs) for the effect of meal timing interventions on systolic blood pressure (mmHg), grouped by the meal timing intervention

**eFigure 47.** Meta-analysis of difference in mean difference (95% CIs) for the effect of meal timing interventions on diastolic blood pressure (mmHg), grouped by the meal timing intervention

**eFigure 48.** Meta-analysis of difference in mean difference (95% CIs) for the effect of time-restricted eating on systolic blood pressure (mmHg), grouped by gender proportion

**eFigure 49.** Meta-analysis of difference in mean difference (95% CIs) for the effect of time-restricted eating on systolic blood pressure (mmHg), grouped by baseline BMI status

**eFigure 50.** Meta-analysis of difference in mean difference (95% CIs) for the effect of time-restricted eating on systolic blood pressure (mmHg), grouped by health status

**eFigure 51.** Meta-analysis of difference in mean difference (95% CIs) for the effect of time-restricted eating on systolic blood pressure (mmHg), grouped by energy prescription

**eFigure 52.** Meta-analysis of difference in mean difference (95% CIs) for the effect of time-restricted eating on systolic blood pressure (mmHg), grouped by follow duration

**eFigure 53.** Meta-analysis of difference in mean difference (95% CIs) for the effect of time-restricted eating on systolic blood pressure (mmHg), grouped by eating window

**eFigure 54.** Meta-analysis of difference in mean difference (95% CIs) for the effect of time-restricted eating on systolic blood pressure (mmHg), grouped by frequency of contact

**eFigure 55.** Meta-analysis of difference in mean difference (95% CIs) for the effect of time-restricted eating on systolic blood pressure (mmHg), grouped by delivery personnel

**eFigure 56.** Meta-analysis of difference in mean difference (95% CIs) for the effect of time-restricted eating on systolic blood pressure (mmHg), grouped by resource provision

**eFigure 57.** Meta-analysis of difference in mean difference (95% CIs) for the effect of time-restricted eating on systolic blood pressure (mmHg), grouped by risk of bias

**eFigure 58.** Meta-analysis of difference in mean difference (95% CIs) for the effect of time-restricted eating on diastolic blood pressure (mmHg), grouped by gender proportion

**eFigure 59.** Meta-analysis of difference in mean difference (95% CIs) for the effect of time-restricted eating on diastolic blood pressure (mmHg), grouped by baseline BMI status

**eFigure 60.** Meta-analysis of difference in mean difference (95% CIs) for the effect of time-restricted eating on diastolic blood pressure (mmHg), grouped by health status

**eFigure 61.** Meta-analysis of difference in mean difference (95% CIs) for the effect of time-restricted eating on Diastolic blood pressure (mmHg), grouped by energy prescription

**eFigure 62.** Meta-analysis of difference in mean difference (95% CIs) for the effect of time-restricted eating on Diastolic blood pressure (mmHg), grouped by follow duration

**eFigure 63.** Meta-analysis of difference in mean difference (95% CIs) for the effect of time-restricted eating on Diastolic blood pressure (mmHg), grouped by eating window

**eFigure 64.** Meta-analysis of difference in mean difference (95% CIs) for the effect of time-restricted eating on Diastolic blood pressure (mmHg), grouped by frequency of contact

**eFigure 65.** Meta-analysis of difference in mean difference (95% CIs) for the effect of time-restricted eating on Diastolic blood pressure (mmHg), grouped by delivery personnel

**eFigure 66.** Meta-analysis of difference in mean difference (95% CIs) for the effect of time-restricted eating on Diastolic blood pressure (mmHg), grouped by resource provision

**eFigure 67.** Meta-analysis of difference in mean difference (95% CIs) for the effect of time-restricted eating on Diastolic blood pressure (mmHg), grouped by risk of bias

**eFigure 68.** Meta-analysis of difference in mean difference (95% CIs) for the effect of meal frequency on BMI (kg/m<sup>2</sup>), grouped by health status

**eFigure 69.** Meta-analysis of difference in mean difference (95% CIs) for the effect of meal frequency on BMI (kg/m<sup>2</sup>), grouped by intervention intensity

**eFigure 70.** Meta-analysis of difference in mean difference (95% CIs) for the effect of time restricted eating on weight (kg), grouped by gender proportion

**eFigure 71.** Meta-analysis of difference in mean difference (95% CIs) for the effect of time restricted eating on weight (kg), grouped by health status

**eFigure 72.** Meta-analysis of difference in mean difference (95% CIs) for the effect of time restricted eating on weight (kg), grouped by energy prescription

**eFigure 73.** Meta-analysis of difference in mean difference (95% CIs) for the effect of time restricted eating on weight (kg), grouped by follow duration

**eFigure 74.** Meta-analysis of difference in mean difference (95% CIs) for the effect of time restricted eating on weight (kg), grouped by frequency of contact

**eFigure 75.** Meta-analysis of difference in mean difference (95% CIs) for the effect of time restricted eating on weight (kg), grouped by delivery personnel

**eFigure 76.** Meta-analysis of difference in mean difference (95% CIs) for the effect of time restricted eating on weight (kg), grouped by resource provision

**eFigure 77.** Meta-analysis of difference in mean difference (95% CIs) for the effect of time restricted eating on weight (kg), grouped by risk of bias

**eFigure 78.** Meta-analysis of difference in mean difference (95% CIs) for the effect of meal frequency on weight (kg), grouped by gender proportion

**eFigure 79.** Meta-analysis of difference in mean difference (95% CIs) for the effect of meal frequency on weight (kg), grouped by baseline BMI status

**eFigure 80.** Meta-analysis of difference in mean difference (95% CIs) for the effect of meal frequency on weight (kg), grouped by health status

**eFigure 81.** Meta-analysis of difference in mean difference (95% CIs) for the effect of meal frequency on weight (kg), grouped by follow duration

**eFigure 82.** Meta-analysis of difference in mean difference (95% CIs) for the effect of meal frequency on weight (kg), grouped by intervention intensity

**eFigure 83.** Meta-analysis of difference in mean difference (95% CIs) for the effect of meal frequency on weight (kg), grouped by frequency of contact

**eFigure 84.** Meta-analysis of difference in mean difference (95% CIs) for the effect of meal frequency on weight (kg), grouped by delivery personnel

**eFigure 85.** Meta-analysis of difference in mean difference (95% CIs) for the effect of meal distribution on weight (kg), grouped by baseline BMI status

**eFigure 86.** Meta-analysis of difference in mean difference (95% CIs) for the effect of meal distribution on weight (kg), grouped by health status

**eFigure 87.** Meta-analysis of difference in mean difference (95% CIs) for the effect of meal distribution on weight (kg), grouped by delivery personnel

**eFigure 88.** Meta-analysis of difference in mean difference (95% CIs) for the effect of meal distribution on weight (kg), grouped by resource provision

**eFigure 89.** Meta-analysis of difference in mean difference (95% CIs) for the effect of time restricted eating on BMI (kg/m<sup>2</sup>), grouped by gender proportion

**eFigure 90.** Meta-analysis of difference in mean difference (95% CIs) for the effect of time restricted eating on BMI (kg/m<sup>2</sup>), grouped by health status

**eFigure 91.** Meta-analysis of difference in mean difference (95% CIs) for the effect of time restricted eating on BMI (kg/m<sup>2</sup>), grouped by energy prescription

**eFigure 92.** Meta-analysis of difference in mean difference (95% CIs) for the effect of time restricted eating on BMI (kg/m<sup>2</sup>), grouped by follow duration

**eFigure 93.** Meta-analysis of difference in mean difference (95% CIs) for the effect of time restricted eating on BMI (kg/m<sup>2</sup>), grouped by eating window

**eFigure 94.** Meta-analysis of difference in mean difference (95% CIs) for the effect of time restricted eating on BMI (kg/m<sup>2</sup>), grouped by frequency of contact

**eFigure 95.** Meta-analysis of difference in mean difference (95% CIs) for the effect of time restricted eating on BMI (kg/m<sup>2</sup>), grouped by delivery personnel

**eFigure 96.** Meta-analysis of difference in mean difference (95% CIs) for the effect of time restricted eating on BMI (kg/m<sup>2</sup>), grouped by resource provision

**eFigure 97.** Meta-analysis of difference in mean difference (95% CIs) for the effect of time restricted eating on BMI (kg/m<sup>2</sup>), grouped by risk of bias

**eFigure 98.** Meta-analysis of difference in mean difference (95% CIs) for the effect of meal frequency on BMI (kg/m<sup>2</sup>), grouped by gender proportion

**eFigure 99.** Meta-analysis of difference in mean difference (95% CIs) for the effect of meal frequency on BMI (kg/m<sup>2</sup>), grouped by baseline BMI status

**eFigure 100.** Meta-analysis of difference in mean difference (95% CIs) for the effect of meal frequency on BMI (kg/m<sup>2</sup>), grouped by follow duration

**eFigure 101.** Meta-analysis of difference in mean difference (95% CIs) for the effect of meal frequency on BMI (kg/m<sup>2</sup>), grouped by frequency of contact

**eFigure 102.** Meta-analysis of difference in mean difference (95% CIs) for the effect of meal frequency on BMI (kg/m<sup>2</sup>), grouped by delivery personnel

**eFigure 103.** Meta-analysis of difference in mean difference (95% CIs) for the effect of meal frequency on BMI (kg/m<sup>2</sup>), grouped by resource provision

**eFigure 104.** Meta-analysis of difference in mean difference (95% CIs) for the effect of meal distribution on BMI (kg/m<sup>2</sup>), grouped by baseline BMI status

**eFigure 105.** Meta-analysis of difference in mean difference (95% CIs) for the effect of meal distribution on BMI (kg/m<sup>2</sup>), grouped by health status

**eFigure 106.** Meta-analysis of difference in mean difference (95% CIs) for the effect of meal distribution on BMI (kg/m<sup>2</sup>), grouped by delivery personnel

**eFigure 107.** Meta-analysis of difference in mean difference (95% CIs) for the effect of meal distribution on BMI (kg/m<sup>2</sup>), grouped by resource provision

**eFigure 108.** Meta-analysis of difference in mean difference (95% CIs) for the effect of meal frequency on lean mass (kg), grouped by gender proportion

**eFigure 109.** Meta-analysis of difference in mean difference (95% CIs) for the effect of meal frequency on lean mass (kg), grouped by follow duration

**eFigure 110.** Meta-analysis of difference in mean difference (95% CIs) for the effect of meal frequency on lean mass (kg), grouped by intervention intensity

**eFigure 111.** Meta-analysis of difference in mean difference (95% CIs) for the effect of meal frequency on lean mass (kg), grouped by frequency of contact

**eFigure 112.** Meta-analysis of difference in mean difference (95% CIs) for the effect of meal frequency on lean mass (kg), grouped by resource provision

**eFigure 113.** Meta-analysis of difference in mean difference (95% CIs) for the effect of meal frequency on waist circumference (cm), grouped by gender proportion

**eFigure 114.** Meta-analysis of difference in mean difference (95% CIs) for the effect of meal frequency on waist circumference (cm), grouped by baseline BMI status

**eFigure 115.** Meta-analysis of difference in mean difference (95% CIs) for the effect of meal frequency on waist circumference (cm), grouped by health status

**eFigure 116.** Meta-analysis of difference in mean difference (95% CIs) for the effect of meal frequency on waist circumference (cm), grouped by intervention intensity

**eFigure 117.** Meta-analysis of difference in mean difference (95% CIs) for the effect of meal frequency on waist circumference (cm), grouped by delivery personnel

**eFigure 118.** Meta-analysis of difference in mean difference (95% CIs) for the effect of meal distribution on waist circumference (cm), grouped by baseline BMI status

**eFigure 119.** Meta-analysis of difference in mean difference (95% CIs) for the effect of meal distribution on waist circumference (cm), grouped by health status

**eFigure 120.** Meta-analysis of difference in mean difference (95% CIs) for the effect of meal distribution on waist circumference (cm), grouped by delivery personnel

**eFigure 121.** Meta-analysis of difference in mean difference (95% CIs) for the effect of meal distribution on waist circumference (cm), grouped by resource provision

**eFigure 122.** Meta-analysis of difference in mean difference (95% CIs) for the effect of time-restricted eating on energy intake (kcal/day), grouped by gender proportion

**eFigure 123.** Meta-analysis of difference in mean difference (95% CIs) for the effect of time-restricted eating on energy intake (kcal/day), grouped by baseline BMI status

**eFigure 124.** Meta-analysis of difference in mean difference (95% CIs) for the effect of time-restricted eating on energy intake (kcal/day), grouped by health status

**eFigure 125.** Meta-analysis of difference in mean difference (95% CIs) for the effect of time-restricted eating on energy intake (kcal/day), grouped by follow duration

**eFigure 126.** Meta-analysis of difference in mean difference (95% CIs) for the effect of time-restricted eating on energy intake (kcal/day), grouped by eating window

**eFigure 127.** Meta-analysis of difference in mean difference (95% CIs) for the effect of time-restricted eating on energy intake (kcal/day), grouped by frequency of contact

**eFigure 128.** Meta-analysis of difference in mean difference (95% CIs) for the effect of time-restricted eating on energy intake (kcal/day), grouped by delivery personnel

**eFigure 129.** Meta-analysis of difference in mean difference (95% CIs) for the effect of time-restricted eating on energy intake (kcal/day), grouped by resource provision

**eFigure 130.** Meta-analysis of difference in mean difference (95% CIs) for the effect of time-restricted eating on energy intake (kcal/day), grouped by risk of bias

**eFigure 131.** Meta-analysis of difference in mean difference (95% CIs) for the effect of time-restricted eating on HbA1c (%), grouped by baseline BMI status

**eFigure 132.** Meta-analysis of difference in mean difference (95% CIs) for the effect of time-restricted eating on HbA1c (%), grouped by health status

**eFigure 133.** Meta-analysis of difference in mean difference (95% CIs) for the effect of time-restricted eating on HbA1c (%), grouped by energy prescription

**eFigure 134.** Meta-analysis of difference in mean difference (95% CIs) for the effect of time-restricted eating on HbA1c (%), grouped by follow duration

**eFigure 135.** Meta-analysis of difference in mean difference (95% CIs) for the effect of time-restricted eating on HbA1c (%), grouped by eating window

**eFigure 136.** Meta-analysis of difference in mean difference (95% CIs) for the effect of time-restricted eating on HbA1c (%), grouped by frequency of contact



**eFigure 137.** Meta-analysis of difference in mean difference (95% CIs) for the effect of time-restricted eating on HbA1c (%), grouped by resource provision

**eFigure 138.** Meta-analysis of difference in mean difference (95% CIs) for the effect of time-restricted eating on HbA1c (%), grouped by risk of bias

**eFigure 139.** Meta-analysis of difference in mean difference (95% CIs) for the effect of meal frequency on HbA1c (%), grouped by gender proportion

**eFigure 140.** Meta-analysis of difference in mean difference (95% CIs) for the effect of meal frequency on HbA1c (%), grouped by baseline BMI status

**eFigure 141.** Meta-analysis of difference in mean difference (95% CIs) for the effect of meal frequency on HbA1c (%), grouped by intervention intensity

**eFigure 142.** Meta-analysis of difference in mean difference (95% CIs) for the effect of meal frequency on HbA1c (%), grouped by frequency of contact

**eFigure 143.** Meta-analysis of difference in mean difference (95% CIs) for the effect of meal frequency on HbA1c (%), grouped by delivery personnel

**eFigure 144.** Meta-analysis of difference in mean difference (95% CIs) for the effect of time-restricted eating on fasting glucose (mg/dL), grouped by gender proportion

**eFigure 145.** Meta-analysis of difference in mean difference (95% CIs) for the effect of time-restricted eating on fasting glucose (mg/dL), grouped by baseline BMI status

**eFigure 146.** Meta-analysis of difference in mean difference (95% CIs) for the effect of time-restricted eating on fasting glucose (mg/dL), grouped by health status

**eFigure 147.** Meta-analysis of difference in mean difference (95% CIs) for the effect of time-restricted eating on fasting glucose (mg/dL), grouped by energy prescription

**eFigure 148.** Meta-analysis of difference in mean difference (95% CIs) for the effect of time-restricted eating on fasting glucose (mg/dL), grouped by follow duration

**eFigure 149.** Meta-analysis of difference in mean difference (95% CIs) for the effect of time-restricted eating on fasting glucose (mg/dL), grouped by eating window

**eFigure 150.** Meta-analysis of difference in mean difference (95% CIs) for the effect of time-restricted eating on fasting glucose (mg/dL), grouped by frequency of contact

**eFigure 151.** Meta-analysis of difference in mean difference (95% CIs) for the effect of time-restricted eating on fasting glucose (mg/dL), grouped by delivery personnel

**eFigure 152.** Meta-analysis of difference in mean difference (95% CIs) for the effect of time-restricted eating on fasting glucose (mg/dL), grouped by resource provision

**eFigure 153.** Meta-analysis of difference in mean difference (95% CIs) for the effect of time-restricted eating on fasting glucose (mg/dL), grouped by risk of bias

**eFigure 154.** Meta-analysis of difference in mean difference (95% CIs) for the effect of meal frequency on fasting glucose (mg/dL), grouped by gender proportion

**eFigure 155.** Meta-analysis of difference in mean difference (95% CIs) for the effect of meal frequency on fasting glucose (mg/dL), grouped by baseline BMI status

**eFigure 156.** Meta-analysis of difference in mean difference (95% CIs) for the effect of meal frequency on fasting glucose (mg/dL), grouped by health status

**eFigure 157.** Meta-analysis of difference in mean difference (95% CIs) for the effect of meal frequency on fasting glucose (mg/dL), grouped by follow duration

**eFigure 158.** Meta-analysis of difference in mean difference (95% CIs) for the effect of meal frequency on fasting glucose (mg/dL), grouped by intervention intensity

**eFigure 159.** Meta-analysis of difference in mean difference (95% CIs) for the effect of meal frequency on fasting glucose (mg/dL), grouped by frequency of contact

**eFigure 160.** Meta-analysis of difference in mean difference (95% CIs) for the effect of meal frequency on fasting glucose (mg/dL), grouped by delivery personnel

**eFigure 161.** Meta-analysis of difference in mean difference (95% CIs) for the effect of meal distribution on fasting glucose (mg/dL), grouped by baseline BMI status

**eFigure 162.** Meta-analysis of difference in mean difference (95% CIs) for the effect of meal distribution on fasting glucose (mg/dL), grouped by health status

**eFigure 163.** Meta-analysis of difference in mean difference (95% CIs) for the effect of meal distribution on fasting glucose (mg/dL), grouped by delivery personnel

**eFigure 164.** Meta-analysis of difference in mean difference (95% CIs) for the effect of meal distribution on fasting glucose (mg/dL), grouped by resource provision

**eFigure 165.** Meta-analysis of difference in mean difference (95% CIs) for the effect of meal frequency on LDL (mg/dL), grouped by gender proportion

**eFigure 166.** Meta-analysis of difference in mean difference (95% CIs) for the effect of meal frequency on LDL (mg/dL), grouped by baseline BMI status

**eFigure 167.** Meta-analysis of difference in mean difference (95% CIs) for the effect of meal frequency on LDL (mg/dL), grouped by health status

**eFigure 168.** Meta-analysis of difference in mean difference (95% CIs) for the effect of meal frequency on LDL (mg/dL), grouped by follow duration

**eFigure 169.** Meta-analysis of difference in mean difference (95% CIs) for the effect of meal frequency on LDL (mg/dL), grouped by intervention intensity

**eFigure 170.** Meta-analysis of difference in mean difference (95% CIs) for the effect of meal frequency on LDL (mg/dL), grouped by frequency of contact

**eFigure 171.** Meta-analysis of difference in mean difference (95% CIs) for the effect of meal frequency on LDL (mg/dL), grouped by delivery personnel

**eFigure 172.** Meta-analysis of difference in mean difference (95% CIs) for the effect of meal frequency on LDL (mg/dL), grouped by resource provision

**eFigure 173.** Meta-analysis of difference in mean difference (95% CIs) for the effect of meal distribution on LDL (mg/dL), grouped by baseline BMI status

**eFigure 174.** Meta-analysis of difference in mean difference (95% CIs) for the effect of meal distribution on LDL (mg/dL), grouped by health status

**eFigure 175.** Meta-analysis of difference in mean difference (95% CIs) for the effect of meal distribution on LDL (mg/dL), grouped by delivery personnel

**eFigure 176.** Meta-analysis of difference in mean difference (95% CIs) for the effect of meal distribution on LDL (mg/dL), grouped by resource provision

**eFigure 177.** Funnel plots for weight (TRE vs control)

**eFigure 178.** Funnel plots for BMI (TRE vs control)

**eFigure 179.** Funnel plots for lean mass (TRE vs control)

**eFigure 180.** Funnel plots for energy intake (TRE vs control)

**eFigure 181.** Funnel plots for HbA1c (TRE vs control)

**eFigure 182.** Funnel plots for fasting glucose (TRE vs control)

**eFigure 183.** Funnel plots for LDL (TRE vs control)

**eFigure 184.** Funnel plots for systolic blood pressure (TRE vs control)

**eFigure 185.** Funnel plots for diastolic blood pressure (TRE vs control)

This supplemental material has been provided by the authors to give readers additional information about their work.

## eTable 1: Search strategy and key concepts/MeSH

### Medline (via Ovid)

((Meal adj3 Frequency) or (meal adj3 timing) or "time-restricted eating" or "time-restricted feeding").tw. or exp "intermittent fasting"/ or "intermittent fasting".tw. or (breakfast adj3 skipping).tw. or "no breakfast".tw. or (morning adj3 fasting).tw. or (morning adj3 fasted).tw. or (morning adj3 fast).tw. or "time restricted fasting".tw. or "time restricted diet".tw. or "delayed eating".tw. or (meal adj3 regularity).tw. or (breakfast adj3 omission).tw. or (omitting adj3 breakfast).tw. or (skipping adj3 meal).tw. or (skipping adj3 meals).tw. or "three-meal diet".tw. or "six meal".tw. or "six meals".tw. or "chrono nutrition".tw. or chrono-nutrition.tw. or "High-calorie breakfast".tw.) and (exp "body weight"/ or "body weight".tw. or exp "body mass index"/ or overweight.tw. or obesity.tw. or "weight loss".tw.)

### Cochrane CENTRAL

((Meal:ti,ab NEAR/3 Frequency:ti,ab) OR (meal:ti,ab NEAR/3 timing:ti,ab) OR "time-restricted eating":ti,ab OR "time-restricted feeding":ti,ab) OR [mh "intermittent fasting"] OR "intermittent fasting":ti,ab OR (breakfast:ti,ab NEAR/3 skipping:ti,ab) OR "no breakfast":ti,ab OR (morning:ti,ab NEAR/3 fasting:ti,ab) OR (morning:ti,ab NEAR/3 fasted:ti,ab) OR (morning:ti,ab NEAR/3 fast:ti,ab) OR "time restricted fasting":ti,ab OR "time restricted diet":ti,ab OR "delayed eating":ti,ab OR (meal:ti,ab NEAR/3 regularity:ti,ab) OR (breakfast:ti,ab NEAR/3 omission:ti,ab) OR (omitting:ti,ab NEAR/3 breakfast:ti,ab) OR (skipping:ti,ab NEAR/3 meal:ti,ab) OR (skipping:ti,ab NEAR/3 meals:ti,ab) OR "three-meal diet":ti,ab OR "six meal":ti,ab OR "six meals":ti,ab OR "chrono nutrition":ti,ab OR chrono-nutrition:ti,ab OR "High-calorie breakfast":ti,ab) AND ([mh "body weight"] OR "body weight":ti,ab OR [mh "body mass index"] OR overweight:ti,ab OR obesity:ti,ab OR "weight loss":ti,ab)

### CINAHL

((((TI Meal OR AB Meal) N3 (TI Frequency OR AB Frequency)) OR ((TI meal OR AB meal) N3 (TI timing OR AB timing)) OR (TI "time-restricted eating" OR AB "time-restricted eating") OR (TI "time-restricted feeding" OR AB "time-restricted feeding")) OR (MH "intermittent fasting+") OR (TI "intermittent fasting" OR AB "intermittent fasting")) OR ((TI breakfast OR AB breakfast) N3 (TI skipping OR AB skipping)) OR (TI "no breakfast" OR AB "no breakfast") OR ((TI morning OR AB morning) N3 (TI fasting OR AB fasting)) OR ((TI morning OR AB morning) N3 (TI fasted OR AB fasted)) OR ((TI morning OR AB morning) N3 (TI fast OR AB fast)) OR (TI "time restricted fasting" OR AB "time restricted fasting") OR (TI "time restricted diet" OR AB "time restricted diet") OR (TI "delayed eating" OR AB "delayed eating") OR ((TI meal OR AB meal) N3 (TI regularity OR AB regularity)) OR ((TI breakfast OR AB breakfast) N3 (TI omission OR AB omission)) OR ((TI omitting OR AB omitting) N3 (TI breakfast OR AB breakfast)) OR ((TI skipping OR AB skipping) N3 (TI meal OR AB meal)) OR ((TI skipping OR AB skipping) N3 (TI meals OR AB meals)) OR (TI "three-meal diet" OR AB "three-meal diet") OR (TI "six meal" OR AB "six meal") OR (TI "six meals" OR AB "six meals") OR (TI "chrono nutrition" OR AB "chrono nutrition") OR (TI chrono-nutrition OR AB chrono-nutrition) OR (TI "High-calorie breakfast" OR AB "High-calorie breakfast")) AND ((MH "body weight+") OR (TI "body weight" OR AB "body weight")) OR (MH "body mass index+") OR (TI overweight OR AB overweight) OR (TI obesity OR AB obesity) OR (TI "weight loss" OR AB "weight loss"))

### Embase

((meal NEAR/3 frequency):ti,ab) OR ((meal NEAR/3 timing):ti,ab) OR 'time-restricted eating':ti,ab OR 'time-restricted feeding':ti,ab OR 'intermittent fasting'/exp/mj OR 'intermittent fasting' OR 'intermittent fasting':ti,ab OR ((breakfast NEAR/3 skipping):ti,ab) OR 'no breakfast':ti,ab OR ((morning NEAR/3 fasting):ti,ab) OR ((morning NEAR/3 fasted):ti,ab) OR ((morning NEAR/3 fast):ti,ab) OR 'time restricted

fasting':ti,ab OR 'time restricted diet':ti,ab OR 'delayed eating':ti,ab OR ((meal NEAR/3 regularity):ti,ab) OR ((breakfast NEAR/3 omission):ti,ab) OR ((omitting NEAR/3 breakfast):ti,ab) OR ((skipping NEAR/3 meal):ti,ab) OR ((skipping NEAR/3 meals):ti,ab) OR 'three-meal diet':ti,ab OR 'six meal':ti,ab OR 'six meals':ti,ab OR 'chrono nutrition':ti,ab OR 'high-calorie breakfast':ti,ab) AND ('body weight'/exp OR 'body weight' OR 'body weight':ti,ab OR 'body mass'/exp/mj OR 'body mass index' OR overweight:ti,ab OR obesity:ti,ab OR 'weight loss':ti,ab)

**Note.** eTable 1 shows the exact search strategies used for each of the mentioned databases

**eTable 2: Notable studies excluded with reasoning**

| <b>Author, Date</b>        | <b>Reason for Exclusion</b>    |
|----------------------------|--------------------------------|
| <b>Alencar, 2015</b>       | Wrong intervention duration    |
| <b>Bantle, 2022</b>        | No anthropometric measurements |
| <b>Crimarco, 2019</b>      | Wrong intervention duration    |
| <b>Erdem, 2022</b>         | Wrong comparator               |
| <b>Papamichou, 2022</b>    | Study protocol                 |
| <b>White, 2023</b>         | Study protocol                 |
| <b>Isenmann, 2021</b>      | Wrong intervention duration    |
| <b>Astbury, 2011</b>       | Wrong intervention duration    |
| <b>Nowak, 2021</b>         | Wrong intervention             |
| <b>Gabel, 2022</b>         | Study protocol                 |
| <b>Bao, 2022</b>           | Wrong intervention duration    |
| <b>Pala, 2022</b>          | Study protocol                 |
| <b>Moro, 2021</b>          | Wrong comparator               |
| <b>Obermayer, 2022</b>     | Wrong intervention             |
| <b>Obermayer, 2023</b>     | Wrong intervention             |
| <b>Suthutvoravut, 2022</b> | Study protocol                 |
| <b>Yang, 2023</b>          | Wrong intervention             |
| <b>Ferrocino, 2022</b>     | Wrong study design             |
| <b>Kanaley, 2014</b>       | Wrong study design             |
| <b>Griffiths, 2016</b>     | Wrong intervention             |
| <b>Munsters, 2012</b>      | Wrong intervention duration    |
| <b>Lee, 2023</b>           | Study protocol                 |
| <b>Correia, 2021</b>       | Wrong intervention duration    |
| <b>Opstad, 2021</b>        | Wrong intervention             |
| <b>Godlin Jeneta, 2016</b> | Wrong study design             |
| <b>Gabel, 2019</b>         | Wrong study design             |
| <b>Yildiran, 2019</b>      | Wrong study design             |
| <b>Agyepong, 2021</b>      | Wrong study design             |
| <b>Moore, 2022</b>         | Wrong study design             |
| <b>Yoshimura, 2017</b>     | Wrong intervention duration    |
| <b>Young, 1972</b>         | Wrong intervention duration    |
| <b>Zimmermann, 2023</b>    | Wrong intervention duration    |

Zhang, 2022

Wrong intervention duration

Vondra, 1976

Wrong study design

Note. eTable 2 details each of the full text articles excluded from the review with the excluded reason.

### eTable 3: Included studies

| Study                            | Reports                                                                                                                                                                                                                                                                                                                                                                                                                                                                                                                                                                                                                                                                                                                                                                                                                                                                                                                                                                                                                                                                                                                                                                                                                                                                                                                                                                                                                                                                                                                           |
|----------------------------------|-----------------------------------------------------------------------------------------------------------------------------------------------------------------------------------------------------------------------------------------------------------------------------------------------------------------------------------------------------------------------------------------------------------------------------------------------------------------------------------------------------------------------------------------------------------------------------------------------------------------------------------------------------------------------------------------------------------------------------------------------------------------------------------------------------------------------------------------------------------------------------------------------------------------------------------------------------------------------------------------------------------------------------------------------------------------------------------------------------------------------------------------------------------------------------------------------------------------------------------------------------------------------------------------------------------------------------------------------------------------------------------------------------------------------------------------------------------------------------------------------------------------------------------|
| Che 2021                         | 1. Che T, Yan C, Tian D, Zhang X, Liu X, Wu Z. Time-restricted feeding improves blood glucose and insulin sensitivity in overweight patients with type 2 diabetes: a randomised controlled trial. <i>Nutrition &amp; Metabolism</i> . 2021;18(1)doi:10.1186/s12986-021-00613-9                                                                                                                                                                                                                                                                                                                                                                                                                                                                                                                                                                                                                                                                                                                                                                                                                                                                                                                                                                                                                                                                                                                                                                                                                                                    |
| Chow 2020                        | 1. Bantle A, Alvear A, Knights D, Chow L, Johnson A. Weight Loss Associated With Time Restricted Eating Is Not Reflected in Changes in the Human Gut Microbiome. <i>Current Developments in Nutrition</i> . 2022;6doi:10.1093/cdn/nzac069.003<br>2. Chow LS, Manoogian E, Alvear AC, Wang Q, Panda S, Mashek DG. Time restricted eating (TRE) promotes weight loss, alters body composition, and improves metabolic parameters in overweight humans. 2019;68doi:10.2337/db19-2076-P<br>3. Chow LS, Manoogian ENC, Alvear A, et al. Time-Restricted Eating Effects on Body Composition and Metabolic Measures in Humans who are Overweight: A Feasibility Study. <i>Obesity (19307381)</i> . 2020;28(5)doi:10.1002/oby.22756<br>4. Crose A, Alvear A, Singroy S, et al. Time-Restricted Eating Improves Quality of Life Measures in Overweight Humans. <i>Nutrients</i> . 2021;13(5)doi:10.3390/nu13051430<br>5. Hibbing PR, Shook RP, Panda S, Manoogian ENC, Mashek DG, Chow LS. Predicting energy intake with an accelerometer-based intake-balance method. 2022;doi:10.1017/S0007114522003312<br>6. Mehfooz A, Lee YL, Wang Q, Chow LS. Time-Restricted Eating Did Not Alter Glycemic Variability in Humans Who Are Overweight and without Diabetes. <i>Diabetes</i> . 2022;71doi:10.2337/db22-699-P<br>7. Simon SL, Fleischer JG, Manoogian EN, Panda S, Mashek DG, Chow L. Objectively-measured sleep following a time restricted eating intervention in adults with obesity. 2020;43(SUPPL 1)doi:10.1093/sleep/zsaa056.1025 |
| de Oliveira Maranhao Pureza 2021 | 1. de Oliveira Maranhão Pureza IR, da Silva Junior AE, Silva Praxedes DR, et al. Effects of time-restricted feeding on body weight, body composition and vital signs in low-income women with obesity: A 12-month randomized clinical trial. <i>Clinical Nutrition</i> . 2021;40(3)doi:10.1016/j.clnu.2020.06.036                                                                                                                                                                                                                                                                                                                                                                                                                                                                                                                                                                                                                                                                                                                                                                                                                                                                                                                                                                                                                                                                                                                                                                                                                 |
| Dhurandhar 2014                  | 1. Dhurandhar EJ, Dawson J, Alcorn A, et al. The effectiveness of breakfast recommendations on weight loss: a randomized controlled trial. <i>American Journal of Clinical Nutrition</i> . 2014;100(2)doi:10.3945/ajcn.114.089573                                                                                                                                                                                                                                                                                                                                                                                                                                                                                                                                                                                                                                                                                                                                                                                                                                                                                                                                                                                                                                                                                                                                                                                                                                                                                                 |
| Jamshed 2022                     | 1. Hanick C, Jamshed H, Bryan D, et al. Effects of time-restricted eating on appetite, eating behaviors, and physical activity in adults. 2020;28(SUPPL 2)doi:10.1002/oby.23063                                                                                                                                                                                                                                                                                                                                                                                                                                                                                                                                                                                                                                                                                                                                                                                                                                                                                                                                                                                                                                                                                                                                                                                                                                                                                                                                                   |

2. Hanick C, Steger F, Jamshed H, et al. Early Time-Restricted Eating for Weight Loss and Metabolic Health: a Secondary Per-Protocol Analysis. 2022;30doi:10.1002/oby.23626
  3. Jamshed H, Steger FL, Bryan DR, et al. Effectiveness of Early Time-Restricted Eating for Weight Loss, Fat Loss, and Cardiometabolic Health in Adults With Obesity: A Randomized Clinical Trial. *JAMA Internal Medicine*. 2022;182(9)doi:10.1001/jamainternmed.2022.3050
  4. Steger F, Jamshed H, Bryan D, et al. Effect of time-restricted eating on weight, fat loss and cardiometabolic risk in adults with obesity. 2020;28(SUPPL 2)doi:10.1002/oby.23057
  5. Steger FL, Jamshed H, Bryan DR, et al. Early time-restricted eating affects weight, metabolic health, mood, and sleep in adherent completers: a secondary analysis. 2023;31 Suppl 1(Suppl 1)doi:10.1002/oby.23614
  6. Steger FL, Jamshed H, Martin CK, et al. Impact of early time-restricted eating on diet quality, meal frequency, appetite, and eating behaviors: a randomized trial. 2023;31 Suppl 1(Suppl 1)doi:10.1002/oby.23642
- Kunduraci 2020
1. Kunduraci YE, Ozbek H. Does the Energy Restriction Intermittent Fasting Diet Alleviate Metabolic Syndrome Biomarkers? A Randomized Controlled Trial. *Nutrients*. 2020;12(10)doi:10.3390/nu12103213
- Lin 2023
1. Lin S, Cienfuegos S, Ezpeleta M, et al. Time-Restricted Eating Without Calorie Counting for Weight Loss in a Racially Diverse Population: A Randomized Controlled Trial. *Annals of Internal Medicine*. 2023;176(7)doi:10.7326/M23-0052
- Liu 2022
1. Liu D, Huang Y, Huang C, et al. Calorie Restriction with or without Time-Restricted Eating in Weight Loss. *New England Journal of Medicine*. 2022;386(16)doi:10.1056/NEJMoa2114833
- Lowe 2020
1. Lowe DA, Wu N, Rohdin-Bibby L, et al. Effects of Time-Restricted Eating on Weight Loss and Other Metabolic Parameters in Women and Men With Overweight and Obesity: The TREAT Randomized Clinical Trial. *JAMA Internal Medicine*. 2020;180(11)doi:10.1001/jamainternmed.2020.4153
- Manoogian 2022
1. Manoogian ENC, Zadourian A, Lo HC, et al. Feasibility of time-restricted eating and impacts on cardiometabolic health in 24-h shift workers: The Healthy Heroes randomized control trial. *Cell Metabolism*. 2022;34(10)doi:10.1016/j.cmet.2022.08.018
- Montero 2023
1. Montero MD. *Effects of three 8-hour time-restricted eating schedules on visceral adipose tissue, body composition and cardiometabolic health in men and women with overweight/obesity: A multicenter randomized controlled trial*. University of Granada; 2023.  
<https://digibug.ugr.es/bitstream/handle/10481/84704/89159.pdf?sequence=4&isAllowed=y>

- Pavlou 2023 1. Pavlou V, Cienfuegos S, Lin S, et al. Effect of Time-Restricted Eating on Weight Loss in Adults With Type 2 Diabetes: A Randomized Clinical Trial. *JAMA Netw Open*. Oct 2 2023;6(10):e2339337. doi:10.1001/jamanetworkopen.2023.39337
- Philips 2021 1. Papageorgiou M, Biver E, Mareschal J, et al. The Effects Of Time-Restricted Eating (Tre) And Weight Loss On Bone Metabolism And Health: an Exploratory Analysis In A 6-Month Randomised Controlled Trial. 2023;54doi:10.1016/j.clnesp.2022.09.296
2. Papageorgiou M, Biver E, Mareschal J, et al. The effects of time-restricted eating and weight loss on bone metabolism and health: a 6-month randomized controlled trial. 2023;31 Suppl 1(Suppl 1)doi:10.1002/oby.23577
3. Phillips NE, Mareschal J, Schwab N, et al. The Effects of Time-Restricted Eating versus Standard Dietary Advice on Weight, Metabolic Health and the Consumption of Processed Food: A Pragmatic Randomised Controlled Trial in Community-Based Adults. *Nutrients*. 2021;13(3)doi:10.3390/nu13031042
- Roman 2020 1. Roman SN, Fitzgerald KC, Beier M, Mowry EM. Safety and feasibility of various fasting-mimicking diets among people with multiple sclerosis. *Multiple Sclerosis and Related Disorders*. 2020;42doi:10.1016/j.msard.2020.102149
- Suthutvoravut 2023 1. Suthutvoravut U, Anothaisintawee T, Boonmanunt S, et al. Efficacy of Time-Restricted Eating and Behavioral Economic Intervention in Reducing Fasting Plasma Glucose, HbA1c, and Cardiometabolic Risk Factors in Patients with Impaired Fasting Glucose: A Randomized Controlled Trial. 2023;15(19). doi:10.3390/nu15194233
- Thomas 2022 1. Thomas EA, Zaman A, Sloggett KJ, et al. Early time-restricted eating compared with daily caloric restriction: A randomized trial in adults with obesity. *Obesity (19307381)*. 2022;30(5)doi:10.1002/oby.23420
2. Zaman A, Grau L, Jeffers R, et al. The effects of early time restricted eating plus daily caloric restriction compared to daily caloric restriction alone on continuous glucose levels. *Obesity Science and Practice*. 2023;doi:10.1002/osp4.702
- Wei 2023 1. Wei X, Lin B, Huang Y, et al. Effects of Time-Restricted Eating on Nonalcoholic Fatty Liver Disease: The TREATY-FLD Randomized Clinical Trial. *JAMA Network Open*. 2023;6(3)doi:10.1001/jamanetworkopen.2023.3513
- Bachman 2012 1. Bachman JL, Raynor HA. Effects of manipulating eating frequency during a behavioral weight loss intervention: a pilot randomized controlled trial. *Obesity (Silver Spring, Md)*. 2012;20(5)doi:https://dx.doi.org/10.1038/oby.2011.360
- Forslund 2008 1. Forslund HB, Klingström S, Hagberg H, Löndahl M, Torgerson JS, Lindroos AK. Should snacks be recommended in obesity treatment? A 1-year randomized clinical trial. *European Journal of Clinical Nutrition*. 2008;62(11)doi:10.1038/sj.ejcn.1602860
- Grangeiro 2021 1. Grangeiro É, Trigueiro MS, Siais LO, et al. Hypocaloric diet with lower meal frequency did not affect weight loss, body composition and insulin responsiveness, but improved lipid profile: a randomized clinical trial. 2021;12(24)doi:10.1039/d1fo00484k



- Jakubowicz 2019
1. Jakubowicz D, Froy O, Tsameret S, et al. Three meals diet with high energy breakfast is an effective strategy for weight loss, reduction of glucose variability and of total daily insulin dose in type 2 diabetes. 2018;61doi:10.1007/s00125-018-4693-0
  2. Jakubowicz D, Froy O, Tsameret S, et al. High energy breakfast diet is an effective strategy for weight loss and reduction of the total daily insulin dose in type 2 diabetes. 2018;39(2)
  3. Jakubowicz D, Landau Z, Tsameret S, et al. Reduction in Glycated Hemoglobin and Daily Insulin Dose Alongside Circadian Clock Upregulation in Patients With Type 2 Diabetes Consuming a Three-Meal Diet: A Randomized Clinical Trial. *Diabetes Care*. 2019;42(12)doi:10.2337/dc19-1142
- Kahleova 2014
1. Belinova L, Kahleova H, Hajek M, Dezortova M, Hill M, Pelikanova T. The effect of frequency of meals on hepatic fat content in patients with type 2 diabetes. *Diabetologia*. 2012;55doi:10.1007/s00125-012-2688-9
  2. Belinova L, Kahleova H, Malinska H, et al. The effect of meal frequency in a reduced-energy regimen on the gastrointestinal and appetite hormones in patients with type 2 diabetes: a randomised crossover study. 2017;12(4)doi:10.1371/journal.pone.0174820
  3. Kahleova H, Belinova L, Hajek M, Dezortova M, Hill M, Pelikanova T. Prolonged fasting reduces hepatic fat content in patients with type 2 diabetes. *Diabetes*. 2012;61doi:10.2337/db12-2763-2907
  4. Kahleova H, Belinova L, Hill M, Pelikanova T. The effect of frequency of meals on body weight, HbA1c and resting energy expenditure in patients with type 2 diabetes. *Diabetologia*. 2012;55doi:10.1007/s00125-012-2688-9
  5. Kahleova H, Belinova L, Hill M, Pelikanova T. Two meals a day are better than six for patients with type 2 diabetes. *Diabetes*. 2012;61doi:10.2337/db12-656-835
  6. Kahleova H, Belinova L, Malinska H, et al. Meal frequency and type 2 diabetes. 2015;8doi:10.1159/000382140
  7. Kahleova H, Belinova L, Malinska H, et al. Eating two larger meals a day (breakfast and lunch) is more effective than six smaller meals in a reduced-energy regimen for patients with type 2 diabetes: a randomised crossover study. 2014;57(8)doi:10.1007/s00125-014-3253-5
  8. Kahleova H, Belinova L, Tura A, et al. The effect of frequency of meals on beta cell function in subjects with type 2 diabetes. *Diabetologia*. 2013;56doi:10.1007/s00125-013-3012-z
  9. Kahleova H, Malinska H, Kazdova L, Belinova L, Hill M, Pelikanova T. The effect of meal frequency on fatty acid composition in serum phospholipids in patients with type 2 diabetes. *Diabetologia*. 2014;57(1)doi:10.1007/s00125-014-3355-0
- Papakonstantinou 2016
1. Papakonstantinou E, Kechribari I, Mitrou P, et al. Effect of meal frequency on glucose levels in women with polycystic ovary syndrome: a randomized trial. 2015;8doi:10.1159/000382140

2. Papakonstantinou E, Kechribari I, Mitrou P, et al. Effect of meal frequency on glucose and insulin levels in women with polycystic ovary syndrome: a randomised trial. 2016;70(5)doi:10.1038/ejcn.2015.225
- Papakonstantinou 2018
1. Papakonstantinou E, Kontogianni MD, Mitrou P, et al. Effects of 6 vs 3 eucaloric meal patterns on glycaemic control and satiety in people with impaired glucose tolerance or overt type 2 diabetes: A randomized trial. *Diabetes Metab.* Jun 2018;44(3):226-234. doi:10.1016/j.diabet.2018.03.008
2. Papakonstantinou E, Mitrou P, Kontogianni MD, Dimitriadis G. Effect of meal frequency on glucose and insulin responses in obese people with impaired glucose tolerance and with type 2 diabetes: a randomised trial. 2017;60(1)doi:10.1007/s00125-017-4350-z
- Zargaran 2014
1. Zargaran ZH, Salehi M, Taghi Heydari S, Babajafari S. The effects of 6 Isocaloric Meals on Body Weight, Lipid Profiles, Leptin, and Adiponectin in Overweight Subjects (BMI > 25). 2014;8(2)
- Jakubowicz 2013
1. Jakubowicz D, Bar Dayan Y, Wainstein J. Differential effect of high calorie breakfast vs. high calorie dinner diet on weight loss and glucose metabolism in women with metabolic syndrome. 2013;5doi:10.1111/1753-0407.12032
2. Jakubowicz D, Barnea M, Wainstein J, Froy O. High caloric intake at breakfast vs. dinner differentially influences weight loss of overweight and obese women. 2013;21(12)doi:10.1002/oby.20460
3. Jakubowicz D, Boaz M, Bar-Dayan Y, Wainstein J. Comparison of the effect of high calorie breakfast diet vs high calorie dinner diet on weight loss, ghrelin, lipids and appetite scores in obese non diabetic women. 2012;33(3)
4. Jakubowicz D, Wainstein J, Froy O. High-calorie breakfast improves weight loss and metabolism vs. isocaloric meal at dinner in obese women with metabolic syndrome. 2013;62doi:10.2337/db13-1395-1677
- Lombardo 2014
1. Lombardo M, Bellia A, Padua E, et al. Morning meal more efficient for fat loss in a 3-month lifestyle intervention. *J Am Coll Nutr.* 2014;33(3):198-205. doi:10.1080/07315724.2013.863169
- Madjd 2016
1. Madjd A, Taylor MA, Delavari A, Malekzadeh R, Macdonald IA, Farshchi HR. Beneficial effect of high energy intake at lunch rather than dinner on weight loss in healthy obese women in a weight-loss program: a randomized clinical trial. *Am J Clin Nutr.* Oct 2016;104(4):982-989. doi:10.3945/ajcn.116.134163
- Madjd 2021
1. Madjd A, Taylor MA, Delavari A, Malekzadeh R, Macdonald IA, Farshchi HR. Effects of consuming later evening meal v. earlier evening meal on weight loss during a weight loss diet: a randomised clinical trial. *Br J Nutr.* Aug 28 2021;126(4):632-640. doi:10.1017/s0007114520004456

**eTable 4: Details of Intervention Delivery**

| Author, year                                          | Instructions given                                                                                                                                                                                | Energy/macro-nutrient prescription | Personalisation                                                                                         | Intervention maintenance            | Frequency of contact | Mode of delivery | Intervention provider                   |
|-------------------------------------------------------|---------------------------------------------------------------------------------------------------------------------------------------------------------------------------------------------------|------------------------------------|---------------------------------------------------------------------------------------------------------|-------------------------------------|----------------------|------------------|-----------------------------------------|
| <b>Time-restricted eating</b>                         |                                                                                                                                                                                                   |                                    |                                                                                                         |                                     |                      |                  |                                         |
| <b>Che 2021</b> <sup>33</sup>                         | C: Usual diet, no time restriction<br><br>I <sub>1</sub> : 10h TRE, 8 am - 6 pm<br><br>Guidance on how to estimate portion sizes and keep detailed food records to obtain accurate dietary intake | Ad libitum                         | None                                                                                                    | Supervisor meetings                 | Weekly               | Face-to-face     | Research supervisor<br><br>Nutritionist |
| <b>Chow 2020</b> <sup>34</sup>                        | C: Usual diet, no time restriction<br><br>I <sub>1</sub> : 8h TRE (self-selected)                                                                                                                 | Ad libitum                         | None                                                                                                    | Phone call, email or text reminders | Weekly               | Online           | Not stated                              |
| <b>de Oliveira Maranhao Pureza 2021</b> <sup>35</sup> | C: Daily energy restriction<br><br>I <sub>1</sub> : 12h TRE (self-selected eating window)                                                                                                         | Energy restriction                 | Energy goal: 500-1000 kcal subtracted from total energy expenditure<br><br>Meal plan based on Brazilian | Nutrition counselling               | Monthly              | Face-to-face     | Dietitian                               |

|                                      |                                                                                                                                                                                                                                  |                                        |                                                    |                                            |                                                     |                            |                    |
|--------------------------------------|----------------------------------------------------------------------------------------------------------------------------------------------------------------------------------------------------------------------------------|----------------------------------------|----------------------------------------------------|--------------------------------------------|-----------------------------------------------------|----------------------------|--------------------|
|                                      |                                                                                                                                                                                                                                  |                                        | guideline on obesity and habitual food consumption |                                            |                                                     |                            |                    |
| <b>Dhurandhar 2014</b> <sup>36</sup> | C: General good nutrition habits<br><br>I <sub>1</sub> : Ate breakfast before 10 am<br><br>I <sub>2</sub> : No energy intake before 11 am<br><br>Received a USDA pamphlet “Let’s Eat for the Health of It” and a summary handout | None                                   | None                                               | Phone calls                                | Weeks 4, 8 and 12                                   | Hybrid                     | Study coordinators |
| <b>Erdem 2022</b> <sup>29</sup>      | I <sub>1</sub> : 6h TRE (1-7 pm)<br><br>I <sub>2</sub> : 8h TRE (1-9 pm)<br><br>Initial visit: portion size training                                                                                                             | Ad libitum                             | None                                               | None                                       | /                                                   | Face-to-face               | Researcher         |
| <b>Jamshed 2022</b> <sup>40</sup>    | C: Self-selected ≥12h eating window<br><br>I <sub>1</sub> : 8h TRE (7 am - 3 pm)                                                                                                                                                 | Energy restriction = REE – 500kcal/day | None                                               | Nutrition counselling<br><br>Group classes | Baseline, weeks 2, 6 and 10<br><br>≥3 times a month | Face-to-face<br><br>Hybrid | Dietitian          |

|                                    |                                                                                                                                                                  |                                |                                                                                                                                                                                        |                                       |                                                                                                      |        |                       |
|------------------------------------|------------------------------------------------------------------------------------------------------------------------------------------------------------------|--------------------------------|----------------------------------------------------------------------------------------------------------------------------------------------------------------------------------------|---------------------------------------|------------------------------------------------------------------------------------------------------|--------|-----------------------|
|                                    | Encouraged to increased exercise to 75-150 minutes/week                                                                                                          |                                |                                                                                                                                                                                        |                                       |                                                                                                      |        |                       |
| <b>Kunduraci 2020<sup>42</sup></b> | C: Daily energy restriction<br><br>I <sub>1</sub> : 8h TRE (Self-selected eating window)<br><br>Instructions to fill out food diaries and fasting log given      | Energy restriction             | Energy goal: 25% reduction from habitual energy intake<br><br>Macro- and micro-nutrient distribution<br><br>Meal plan based on Turkey National Dietary Guidelines (Mediterranean Diet) | Phone calls and compliance interviews | Weekly                                                                                               | Hybrid | Clinician & Dietitian |
| <b>Lin 2023<sup>15</sup></b>       | C: Maintained weight, physical activity habits & 10h+ baseline eating window<br><br>I <sub>1</sub> : 8h TRE (12-8 pm). At 26 weeks, eating window widened to 10h | Ad libitum                     | None                                                                                                                                                                                   | Nutrition counselling                 | Weekly for first 12 weeks<br><br>Fortnightly for next 12 weeks<br><br>Monthly for the final 6 months | Online | Dietitian             |
| <b>Liu 2022<sup>43</sup></b>       | C: No time restriction                                                                                                                                           | Energy restriction = 1500-1800 | None                                                                                                                                                                                   | Phone calls/app messages              | Twice a week then monthly in                                                                         | Hybrid | Trained health coach  |

|                               |                                                                                       |                                                                              |      |  |                           |  |                   |                                               |            |
|-------------------------------|---------------------------------------------------------------------------------------|------------------------------------------------------------------------------|------|--|---------------------------|--|-------------------|-----------------------------------------------|------------|
|                               | I <sub>1</sub> : 8h TRE (8am - 4pm)                                                   | kcal/d for men & 1                                                           |      |  |                           |  |                   | the last 6 months                             |            |
|                               | Encouraged to weigh food to ensure accuracy of intake                                 | 200-1500 kcal/d for women                                                    |      |  | Nutrition counselling     |  |                   | Fortnightly then monthly in the last 6 months |            |
|                               | 1 protein shake per day for first 6 months                                            | Macronutrient distribution (40-55% carbohydrate, 15-20% protein, 20-30% fat) |      |  | Health education sessions |  |                   | Monthly                                       |            |
|                               | Written dietary information booklets with food portion advice and sample menus        |                                                                              |      |  |                           |  |                   |                                               |            |
|                               | Mobile app for daily food log with pictures and mealtimes                             |                                                                              |      |  |                           |  |                   |                                               |            |
| <b>Lowe 2020<sup>45</sup></b> | C: 3 meals daily (7-11 am, 11 am-3 pm, 4-10 pm) Snacking between meals was permitted. | Ad libitum                                                                   | None |  | App reminders             |  | Three times a day | Remote                                        | Not stated |

I<sub>1</sub>: 8h TRE (12-8 pm)

Mobile app with Bluetooth scale connected for weight and blood pressure measurements, surveys and message reminders

**Manoogian 2022**<sup>46</sup>

C: No time restriction

Ad libitum

None

App reminders

Not stated

Remote

Dietitian

I<sub>1</sub>: 10h TRE (self-selected eating window)

Mediterranean Diet (60% carbohydrates, 15% protein and 25% fat)

Mediterranean Diet cookbook

Nutrition counselling

Week 6

Mobile app for food log

**Montero 2023**<sup>18</sup>

Received an educational program

No energy restriction

None

None

N/A

N/A

N/A

C: Usual care

|                                   |                                                                                                                                    |                                     |      |                                                                                             |                                                                        |                |            |
|-----------------------------------|------------------------------------------------------------------------------------------------------------------------------------|-------------------------------------|------|---------------------------------------------------------------------------------------------|------------------------------------------------------------------------|----------------|------------|
|                                   | I1: 8h TRE (starting by 10:00am)                                                                                                   | Education on Mediterranean diet     |      |                                                                                             |                                                                        |                |            |
|                                   | I2: 8h TRE (starting by 12:00pm)                                                                                                   |                                     |      |                                                                                             |                                                                        |                |            |
|                                   | I3: 8h TRE (self-selected eating window)                                                                                           |                                     |      |                                                                                             |                                                                        |                |            |
| <b>Pavlou 2023</b> <sup>19</sup>  | Instructed to maintain their weight and usual eating and exercise habits                                                           | No energy restriction               | None | Recorded adherence, weight changes, etc. TRE groups were taught about healthy food choices. | Weekly until 3 months, bi-weekly thereafter.                           | Telephone/zoom | Dietitian  |
|                                   | C: Usual care                                                                                                                      | General healthy eating instructions |      |                                                                                             |                                                                        |                |            |
|                                   | I1: 8h TRE (Ad libitum 12-8pm)                                                                                                     |                                     |      |                                                                                             |                                                                        |                |            |
| <b>Philips 2021</b> <sup>49</sup> | C: Usual care (10-minute nutritional counselling at randomisation and a leaflet summarising food pyramid and Swiss dietary advice) | Ad libitum                          | None | Phone calls and email                                                                       | After 2 weeks of observation, and after 2 and 4 months of intervention | Remote         | Not stated |
|                                   | I <sub>1</sub> : 12h TRE (self-selected eating window with no nutritional advice)                                                  |                                     |      |                                                                                             |                                                                        |                |            |



|                                         |                                                                                                                                                      |                                                                                                             |             |                                                       |                                                       |                                                                                               |                      |
|-----------------------------------------|------------------------------------------------------------------------------------------------------------------------------------------------------|-------------------------------------------------------------------------------------------------------------|-------------|-------------------------------------------------------|-------------------------------------------------------|-----------------------------------------------------------------------------------------------|----------------------|
|                                         | Mobile app for food log                                                                                                                              |                                                                                                             |             |                                                       |                                                       |                                                                                               |                      |
| <b>Roman 2020</b> <sup>50</sup>         | C: Usual diet<br><br>I <sub>1</sub> : 8h TRE (self-selected eating window)                                                                           | Ad libitum                                                                                                  | None        | SMS message                                           | Twice a week                                          | Remote                                                                                        | Not stated           |
| <b>Suthutvoravut 2023</b> <sup>20</sup> | C: Usual care<br><br>I <sub>1</sub> : 9h TRE (8 am - 5 pm)                                                                                           | Ad libitum                                                                                                  | None        | None                                                  | /                                                     | /                                                                                             | Not stated           |
| <b>Thomas 2022</b> <sup>51</sup>        | C: No time restriction<br><br>I <sub>1</sub> : 10h TRE (starting within 3 h of waking)<br><br>Encouraged to perform 150min/week of moderate activity | Energy restriction = REE - 10%                                                                              | Energy goal | Group-based program based on PreventT2 curriculum     | Weekly first 12 weeks then monthly during weeks 13-39 | Cohort 1 & 2: Face-to-face<br><br>Cohort 3: Face-to-face then remote from week 6 due to COVID | Dietitian            |
| <b>Wei 2023</b> <sup>21</sup>           | C: No time restriction<br><br>I <sub>1</sub> : 8h TRE (8 am - 4 pm)<br><br>Encouraged to weigh food to                                               | Energy restriction = 1500-1800 kcal/d for men & 1200-1500 kcal/d for women<br><br>Macronutrient composition | Energy goal | Phone calls/app messages<br><br>Nutrition counselling | Twice a week then monthly in the last 6 months        | Hybrid                                                                                        | Trained nutritionist |

|                                                                                |                                                                   |                           |                                               |
|--------------------------------------------------------------------------------|-------------------------------------------------------------------|---------------------------|-----------------------------------------------|
| ensure accuracy of intake                                                      | (40% to 55% carbohydrate, 15% to 20% protein, and 20% to 30% fat) |                           | Fortnightly then monthly in the last 6 months |
| 1 protein shake per day for first 6 months                                     |                                                                   | Health education sessions | Monthly                                       |
| Written dietary information booklets with food portion advice and sample menus |                                                                   |                           |                                               |
| Mobile app for daily dietary log with pictures and mealtimes                   |                                                                   |                           |                                               |

**Meal Frequency**

|                                  |                                                                                                                                                                                     |                                       |                                                                                                                                                |                                                                                                       |                                                           |              |                                                                                                                                  |
|----------------------------------|-------------------------------------------------------------------------------------------------------------------------------------------------------------------------------------|---------------------------------------|------------------------------------------------------------------------------------------------------------------------------------------------|-------------------------------------------------------------------------------------------------------|-----------------------------------------------------------|--------------|----------------------------------------------------------------------------------------------------------------------------------|
| <b>Bachman 2012<sup>32</sup></b> | I <sub>1</sub> : 3 meals per day<br>I <sub>2</sub> : Grazing group - ≥100kcal every 2-3 h. Distribution of energy recommended to follow typical diet for Americans (75% energy from | Isocaloric energy and fat restriction | Encouraged to decide how they wanted to divide their energy intake between the 3 meals.<br><br>Guidelines in form of meal plan provided. Asked | Meetings<br><br>At each meeting, participants were weighed, homework was discussed, and a behavioural | Weekly for 4 months then bimonthly for remaining 2 months | Face-to-face | Study principle investigator (Masters level training in nutrition, registered dietitian, and training in exercise physiology and |
|----------------------------------|-------------------------------------------------------------------------------------------------------------------------------------------------------------------------------------|---------------------------------------|------------------------------------------------------------------------------------------------------------------------------------------------|-------------------------------------------------------------------------------------------------------|-----------------------------------------------------------|--------------|----------------------------------------------------------------------------------------------------------------------------------|

meals). Provided a list of snack ideas.

Participants with a body weight  $\leq 200$  lbs were prescribed 1,200 kcals/day and participants with body weight  $> 200$  lbs were prescribed 1,500 kcals/day. Intake of fat was restricted to  $< 30\%$  energy from fat. Encouraged to build up physical activity.

to create individual eating schedule, schedules reviewed and adjusted if needed.

lesson. Self-monitoring records were turned in at each meeting and individualized feedback on program goals was provided.

behavioural psychology)

**Forslund 2008<sup>37</sup>**

I<sub>1</sub>: 3 meals per day.

Recommended daily energy distribution: 30% Breakfast, 35% Lunch, 35% Dinner.

I<sub>2</sub>: 3 snacks + 3 meals per day.

Isocaloric energy restriction

Instruction about eating frequency and individualized diet plan provided.

Energy needs calculated; participants given personal energy restriction 30% less than needs.

Meetings

Every 2 weeks for first 12 weeks then every four weeks until week 52

Face-to-face?

Local dietician, physician and nurse

Recommended daily energy distribution: 20% Breakfast, 25% lunch, 25% dinner + 3 snacks 10% each

All diets followed the Swedish Nutrition Recommendations

**Grangeiro 2021<sup>14</sup>**

I<sub>1</sub>: 6 meal diet  
I<sub>2</sub>: 3 meal diet

Isocaloric energy restriction

The dietary prescription was devised by trained nutritionists and the diets were calculated a software.

Initial meeting to teach use of dietary records, second meeting for assessments.

? Face-to-face?

Nutritionists

Hypocaloric diet (decreased from TEE by ~700kcal/day) consisting of six daily meals: breakfast (15%TEE), snack (5%–10% TEE), lunch (25%TEE), snack (5%–10% TEE), dinner (25%TEE) and evening snack (5%–10% TEE) OR consisting of three daily

Diet compliance measured through self-reported food record (assessed during 3 individual meetings). Dietary registration forms reviewed for accuracy.

Carried out until week 12

meals: breakfast (20%-25%TEE), lunch (35%-40% TEE), and dinner (35%-40% TEE)

**Jakubowicz 2019<sup>39</sup>**

I<sub>1</sub>: 3 meal diet  
I<sub>2</sub>: 6 meal diet

Isocaloric energy restriction

Isocaloric energy restriction by subtracting 500 kcal from the individual calculated Harris Benedict equation.

Personal dietary counselling by dietitian

10-15 minute conversation

Appointment for insulin titration

Every 2 weeks

Twice a week

Biweekly

Face-to-face?

Phone

Face-to-face?

Dietitian

Physician

3 meal diet consisted of a large breakfast of 700 kcal, a medium-sized lunch of 600 kcal, and a small dinner of 200 kcal; 6 meal diet consisted of six meals (breakfast, lunch, dinner, and three snacks) with relatively uniform daily caloric distribution in the meals plus 150 kcal in each one of the three snacks.

All participants were asked to eat breakfast before 0930, lunch between 1200-1500, and dinner between 1800-2000. Additional three snacks at 1100, 1700, and 2200.

For both - same macronutrient composition of fat, protein, and carbohydrates (35:25:40%, respectively)

**Kahleova 2014<sup>41</sup>**

I<sub>1</sub>: 6 meal diet (3 main meals (breakfast, lunch, dinner) + 3 smaller snacks in between)

Isocaloric energy restriction

Restriction of 500 kcal/day from resting energy expenditure (REE) of individuals measured by indirect calorimetry

Four day diet tutorial with follow up meetings (lectures + cooking classes)

Diet records

Initial tutorial followed by 1 hour weekly for entire study duration

Face-to-face

Unspecified Dietitian assessed dietary records

I<sub>2</sub>: 2 meal diet  
(Breakfast and  
Lunch)

Weeks 0, 12  
and 24 (3-day  
record)

Followed  
Diabetes and  
Nutrition of the  
European  
Association for  
the Study of  
Diabetes  
guidelines.

Total daily energy  
breakdown: 50–  
55%  
carbohydrates,  
20–25% protein  
and less than 30%  
fat with 30–40  
grams of fibre.

Meals provided for  
a randomised ½ of  
study  
participants.

**Papakonstant  
inou 2016**<sup>47</sup>

I<sub>1</sub>: 3 meal diet  
I<sub>2</sub>: 6 meal diet

Energy  
maintenance

Instructions  
provided on how  
to record food

Energy intake  
records

Daily

Face-to-  
face??

Participants  
kept food  
records

Macronutrient  
breakdown: 40%  
carbohydrates,  
25% protein and  
35% fat.

Monitored and  
adjusted food  
records

Biweekly

Dietitians  
checked food  
records

Three-meal  
pattern  
carbohydrate  
distribution

pattern was 20%  
at breakfast, 50%  
at lunch and 30%  
at dinner.

The six-meal  
carbohydrate  
breakdown was  
20% at breakfast,  
10% at morning  
snack, 30% at  
lunch, 10% at  
afternoon snack,  
20% at dinner and  
10% at before  
bedtime  
snack.



**Papakonstantinou 2018a<sup>48</sup>**

I<sub>1</sub>: 3 meal diet  
I<sub>2</sub>: 6 meal diet

Macronutrient breakdown: 45% carbohydrates, 20% protein and 35% fat.

Three-meal pattern carbohydrate distribution

pattern was 20% at breakfast, 50% at lunch and 30% at dinner.

The six-meal carbohydrate breakdown was 20% at breakfast, 10% at morning snack, 30% at lunch, 10% at afternoon snack,

Energy maintenance

Dietary plans provided with guidance foods to eat and meal preparation.

Caloric requirements calculated using Schofield equation.

For each 12-week intervention, five 7-day food diaries were used to check compliance with the dietary plan. Detailed instructions were given on how to record the quantity of food consumed, using standard household weights and measures.

Food records daily

Education sessions and structured interviews where changes were proposed

Reviewed every 2-weeks ??

Kept by participants, reviewed by dietitian

20% at dinner and  
10% at bedtime

snack.

|                                             |                                                                                                                   |                                                                         |                                                                                                                                                                                                                                             |                                                                          |                        |    |                                             |
|---------------------------------------------|-------------------------------------------------------------------------------------------------------------------|-------------------------------------------------------------------------|---------------------------------------------------------------------------------------------------------------------------------------------------------------------------------------------------------------------------------------------|--------------------------------------------------------------------------|------------------------|----|---------------------------------------------|
| <b>Papakonstantinou 2018b</b> <sup>48</sup> | I <sub>1</sub> : 3 meal diet<br>I <sub>2</sub> : 6 meal diet                                                      | Energy maintenance                                                      | For each 12-week intervention, five 7-day food diaries were used to check compliance with the dietary plan. Detailed instructions were given on how to record the quantity of food consumed, using standard household weights and measures. | Food records daily                                                       | Reviewed every 2-weeks | ?? | Kept by participants, reviewed by dietitian |
|                                             | Macronutrient breakdown: 45% carbohydrates, 20% protein and 35% fat.                                              | Dietary plans provided with guidance foods to eat and meal preparation. |                                                                                                                                                                                                                                             | Education sessions and structured interviews where changes were proposed |                        |    |                                             |
|                                             | Three-meal pattern carbohydrate distribution<br><br>pattern was 20% at breakfast, 50% at lunch and 30% at dinner. | Caloric requirements calculated using Schofield equation.               |                                                                                                                                                                                                                                             |                                                                          |                        |    |                                             |
|                                             | The six-meal carbohydrate breakdown was 20% at breakfast, 10% at morning                                          |                                                                         |                                                                                                                                                                                                                                             |                                                                          |                        |    |                                             |

snack, 30% at lunch, 10% at afternoon snack, 20% at dinner and 10% at bedtime

snack.

|                                          |                                                                                                                                                                                                                                                                                                                                                            |                           |                                                                                                                                                                                                       |                          |                                                        |            |            |
|------------------------------------------|------------------------------------------------------------------------------------------------------------------------------------------------------------------------------------------------------------------------------------------------------------------------------------------------------------------------------------------------------------|---------------------------|-------------------------------------------------------------------------------------------------------------------------------------------------------------------------------------------------------|--------------------------|--------------------------------------------------------|------------|------------|
| <p><b>Zargaran 2014<sup>52</sup></b></p> | <p>C: Normal diet (mostly three meals and two snacks)</p> <p>I<sub>1</sub>: 6 meal diet (iso-caloric meals)</p> <p>The control group was trained only about healthy nutrition in 2 sessions.</p> <p>6 iso-caloric meals, energy is divided into six equal parts (one meal every three hours), instead of their previous meal pattern. The intervention</p> | <p>Energy restriction</p> | <p>Weight loss diet written for both groups. Energy intake planned for each subject was 400 kcal less energy needed for weight maintenance. Macronutrient percentage was the same in both groups.</p> | <p>Training sessions</p> | <p>2 sessions (control), 4 sessions (intervention)</p> | <p>N/A</p> | <p>N/A</p> |
|------------------------------------------|------------------------------------------------------------------------------------------------------------------------------------------------------------------------------------------------------------------------------------------------------------------------------------------------------------------------------------------------------------|---------------------------|-------------------------------------------------------------------------------------------------------------------------------------------------------------------------------------------------------|--------------------------|--------------------------------------------------------|------------|------------|

group was trained on how to divide daily energy into 6

isocaloric meals in 4 sessions.

### Meal Distribution

|                                     |                                                                                                                                                                                                                      |                                                                                                                                                                                                                                                                                  |                                                                                             |                                                              |        |              |                                |
|-------------------------------------|----------------------------------------------------------------------------------------------------------------------------------------------------------------------------------------------------------------------|----------------------------------------------------------------------------------------------------------------------------------------------------------------------------------------------------------------------------------------------------------------------------------|---------------------------------------------------------------------------------------------|--------------------------------------------------------------|--------|--------------|--------------------------------|
| <b>Jakubowicz 2013<sup>38</sup></b> | <b>I1:</b> High-calorie breakfast with a small dinner<br><br><b>I2:</b> high-calorie dinner (D) with a small breakfast<br><br>Meal times:<br>Breakfast:<br>6:00-9:00, lunch:<br>12:00-15:00,<br>dinner: 18:00-21:00. | Total daily energy of 1400 +/- 25 kcal with identical macronutrient content and composition between groups.<br><br>BF meal plan: a large breakfast (700 kcal, 50%), medium-sized lunch (500 kcal, 36%), and a small dinner (200 kcal, 14%)<br><br>Dinner plan was opposite above | Meal plans provided and proper food replacement choices for each item allowed for variation | Weekly 3-day food record<br><br>Bi-weekly Nutrition consults | Weekly | Face-to-face | Research supervisor, Dietitian |
|-------------------------------------|----------------------------------------------------------------------------------------------------------------------------------------------------------------------------------------------------------------------|----------------------------------------------------------------------------------------------------------------------------------------------------------------------------------------------------------------------------------------------------------------------------------|---------------------------------------------------------------------------------------------|--------------------------------------------------------------|--------|--------------|--------------------------------|

|                                   |                                                                                                                                                                                                                       |                                                                                                                                                                             |                                                                                                                              |                                                                                                                           |           |                     |                      |
|-----------------------------------|-----------------------------------------------------------------------------------------------------------------------------------------------------------------------------------------------------------------------|-----------------------------------------------------------------------------------------------------------------------------------------------------------------------------|------------------------------------------------------------------------------------------------------------------------------|---------------------------------------------------------------------------------------------------------------------------|-----------|---------------------|----------------------|
| <b>Lombardo 2014<sup>44</sup></b> | <p>C: Even energy distribution</p> <p>55% energy breakfast to lunch, 45% energy afternoon tea to dinner)</p> <p>I1: Front loading energy</p> <p>70% energy breakfast to lunch, 30% energy afternoon tea to dinner</p> | Ad libitum                                                                                                                                                                  | Mediterranean-style diet tailored to individual                                                                              | <p>3-day diet diary each week</p> <p>Weekly nutrition counselling</p> <p>As needed phone support consultation service</p> | Weekly    | Face-to-Face, Phone | Dietitian            |
| <b>Madjd 2016<sup>16</sup></b>    | <p>I1: Large Lunch group: Energy distribution 15% breakfast 15% snacks, 50% lunch, 20% dinner</p> <p>I2: Large Dinner group</p> <p>Energy distribution same as above with lunch (20%) and</p>                         | <p>Hypoenergetic diet designed for 7-10% weight loss over 12 weeks</p> <p>17% of energy from protein, 23% from fat (10% from saturated fat), and 60% from carbohydrate,</p> | <p>Individualised diet programs in line with food record and preferences with gradual modification to NovinDiet protocol</p> | <p>Nutrition counselling</p> <p>Nutrition resources (booklets)</p> <p>Access to a website, weekly internet magazines</p>  | Bi-weekly | Phone, Face-to-Face | Dietitian, physician |

|                                 |                                                                |                                                                                                                                               |                                                                 |                       |           |                     |           |
|---------------------------------|----------------------------------------------------------------|-----------------------------------------------------------------------------------------------------------------------------------------------|-----------------------------------------------------------------|-----------------------|-----------|---------------------|-----------|
|                                 | dinner (50%) swapped                                           | with 400 g fruit and vegetables                                                                                                               |                                                                 | Physician support     |           |                     |           |
| <b>Madjd 2021</b> <sup>17</sup> | I1: Early dinner group<br>Evening meal between 7 pm-7:30 pm    | 2092–2184 kJ (500–1000 kcal) energy deficit based on EER                                                                                      | Individualised diet program based on food diary and preferences | Nutrition counselling | Bi-Weekly | Phone, Face-to-Face | Dietitian |
|                                 | I2: Late Dinner group<br>Evening meal between 10:30 pm – 11 pm | Energy distribution both groups<br>15 % breakfast<br>15% snacks,<br>50 % lunch,<br>20 % dinner                                                |                                                                 |                       |           |                     |           |
|                                 |                                                                | 17% of energy from protein, 23 % from fat (<10 % from saturated fat) and 60 % from carbohydrate – with at least 400 g/d fruits and vegetables |                                                                 |                       |           |                     |           |

**eTable 5: Adherence outcomes**

| Study                  | Definition                                                                                                                                                                  | Mean (SD)                                                                                                                                      |
|------------------------|-----------------------------------------------------------------------------------------------------------------------------------------------------------------------------|------------------------------------------------------------------------------------------------------------------------------------------------|
| Time-restricted eating |                                                                                                                                                                             |                                                                                                                                                |
| <b>Che 2021</b>        | Daily self-reported eating window adherence (no. of days/week)                                                                                                              | I <sub>1</sub> : 6.59 (0.95)                                                                                                                   |
| <b>Chow 2020</b>       | (a) Daily self-reported logging adherence<br>(b) Eating window compliance within ±15 minutes, ±30 minutes, and ±60 minutes via myCircadianClock (mCC) app over 12 weeks     | C: (a) 90.9% (8.3)<br>I <sub>1</sub> : (a) 83.1% (13.4)<br>(b) ±15 minutes: 55.5% (22.4)<br>±30 minutes: 60% (23)<br>±60 minutes: 66.3% (20.7) |
| <b>Dhurandhar 2014</b> | Self-reported percentage of days complying with the breakfast skipping recommendation over 16 weeks                                                                         | I: 92.40%                                                                                                                                      |
| <b>Jamshed 2022</b>    | Daily self-reported eating window adherence (no. of days/week) via REDCap (Research Electronic Data Capture) surveys                                                        | C: 6.3 (0.8)<br>I <sub>1</sub> : 6.0 (0.8)                                                                                                     |
| <b>Lin 2023</b>        | Control: Percentage of participants adhering to energy restriction from food record data<br><br>TRE: Daily self-reported eating window adherence via app (no. of days/week) | C: 61%<br>I <sub>1</sub> : 6.1 (0.8)                                                                                                           |
| <b>Liu 2022</b>        | Mean percentage of days adhering to the assigned diet assessed from daily dietary log, food pictures, and the eating window noted via app over 12 months                    | C: 83.8% (12.6)<br>I <sub>1</sub> : 84.0% (16.1)                                                                                               |
| <b>Lowe 2020</b>       | Percentage of days adhering to protocol reported on daily adherence surveys                                                                                                 | C: 92.10%<br>I <sub>1</sub> : 83.50%                                                                                                           |
| <b>Manoogian 2022</b>  | Logging adherence (number of days out of 14 days) via myCircadianClock (mCC) app over 12 weeks                                                                              | C: 10.07 (2.67)<br>I <sub>1</sub> : 10.23 (2.71)                                                                                               |
| <b>Roman 2020</b>      | Self-reported percentage of study days with a calorie intake interval (CII) <8 hours duration                                                                               | C: 29.7% (13.87)<br>I <sub>1</sub> : 64.61% (19.80)                                                                                            |
| <b>Thomas 2022</b>     | Self-reported adherence (no. of days/week) via questionnaires over 12 weeks<br><br>(a) Energy restriction<br>(b) Eating window                                              | C: (a) 3.9 (1.5)<br>I <sub>1</sub> : (a) 4.4 (1.6)<br>(b) 5.5 (1.2)                                                                            |
| <b>Wei 2023</b>        | Percentage of days adhering to the diet program via dietary log, food pictures and mealtimes via app over 12 months                                                         | C: 85.0% (10.7)<br>I <sub>1</sub> : 85.7% (9.4)                                                                                                |

Meal frequency

|                       |                                                                                                                           |                                 |
|-----------------------|---------------------------------------------------------------------------------------------------------------------------|---------------------------------|
| <b>Bachman 2012</b>   | (a) Percentage of self-monitoring diaries submitted                                                                       | I <sub>1</sub> :                |
|                       | (b) Percentage of attendance                                                                                              | (a) 78.8% (23.4)                |
|                       |                                                                                                                           | (b) 91.2% (14.1)                |
|                       |                                                                                                                           | I <sub>2</sub> :                |
|                       |                                                                                                                           | (a) 69.2% (31.1)                |
|                       |                                                                                                                           | (b) 81.2% (23.0)                |
| <b>Grangeiro 2021</b> | Average percentage of stipulated meals consumed assessed from the periodic food record assessed three times over 12 weeks | I <sub>1</sub> : 76.80% (16.96) |
|                       |                                                                                                                           | I <sub>2</sub> : 70.81% (16.78) |

Meal distribution

|                        |                                                                                                                            |                                                    |
|------------------------|----------------------------------------------------------------------------------------------------------------------------|----------------------------------------------------|
| <b>Jakubowicz 2013</b> | Self-reported weekly three-day diet record<br>Noncompliance: a deviation of 10% or more from the recommended energy intake | Higher compliance in BF group than D group         |
| <b>Madjd 2021</b>      | Percentage of days following dinner time recommendation from self-reported diary log                                       | I <sub>1</sub> : 91.80%<br>I <sub>2</sub> : 93.20% |

**Note.** eTable 5 details the reported mean (SD) for adherence to the prescribed intervention over the duration of the study based on how each study reported adherence. SD = Standard deviation, C = control group, I<sub>1</sub> = first intervention group, I<sub>2</sub> = second intervention group, BF = Breakfast, D = Dinner

**eTable 6: Hunger outcomes**

| Study                             | Measuring tool | Timepoints extracted | Mean (SD)                                                                                    |
|-----------------------------------|----------------|----------------------|----------------------------------------------------------------------------------------------|
| Time-restricted eating            |                |                      |                                                                                              |
| <b>Jamshed 2022 (Steger 2023)</b> | VAS (0-100 mm) | Baseline & 14 weeks  | C: -18 (38.34)<br>I <sub>1</sub> : -3 (53.85)                                                |
| <b>Thomas 2022</b>                | VAS (0-100 mm) | Baseline & 12 weeks  | C: 0.3 (4.27)<br>I <sub>1</sub> : -2.5 (3.75)                                                |
|                                   | TFEQ (0-14)    | Baseline & 12 weeks  | C: -1.1 (0.89)<br>I <sub>1</sub> : -1.0 (0.84)                                               |
| Meal frequency                    |                |                      |                                                                                              |
| <b>Bachman 2012</b>               | VAS (0-100 mm) | Baseline & 26 weeks  | I <sub>1</sub> : no significant difference<br>I <sub>2</sub> : significant decrease (p<0.05) |
| <b>Jakubowicz 2019</b>            | VAS (0-100 mm) | Baseline & 12 weeks  | I <sub>1</sub> : -18 (3)                                                                     |



|                              |                |                               |                                                                                   |
|------------------------------|----------------|-------------------------------|-----------------------------------------------------------------------------------|
|                              |                |                               | $I_2$ : 2 (1.7)                                                                   |
| <b>Papakonstantinou 2016</b> | VAS (0-10)     | Biweekly average for 12 weeks | $I_1$ : 3.1 (0.35)<br>$I_2$ : 2.3 (0.30)                                          |
| <b>Papakonstantinou 2018</b> | VAS (0-10)     | Biweekly average for 12 weeks | $I_1$ : 3.30 (2.12)<br>$I_2$ : 2.54 (1.65)                                        |
| Meal distribution            |                |                               |                                                                                   |
| <b>Jakubowicz 2013</b>       | VAS (0-100 mm) | Week 2                        | Mean daily hunger levels in BF group were 28% lower than D group ( $p < 0.0001$ ) |

**Note.** eTable 6 details the reported mean (SD) for hunger as measured using the detailed measuring tool. SD = Standard deviation, C = control group,  $I_1$  = first intervention group,  $I_2$  = second intervention group

### eTable 7: Satiety outcomes

| Study                             | Measuring tool | Timepoints extracted | Mean (SD)                                                                           |
|-----------------------------------|----------------|----------------------|-------------------------------------------------------------------------------------|
| Time-restricted eating            |                |                      |                                                                                     |
| <b>Jamshed 2022 (Steger 2023)</b> | VAS (0-100 mm) | Baseline & 14 weeks  | C: -20 (38.34)<br>$I_1$ : -6 (32.31)                                                |
| <b>Thomas 2022</b>                | VAS (0-100 mm) | Baseline & 12 weeks  | C: -0.3 (5.24)<br>$I_1$ : -2.4 (4.5)                                                |
| Meal frequency                    |                |                      |                                                                                     |
| <b>Papakonstantinou 2016</b>      | VAS (0-10)     | Biweekly average     | $I_1$ : 8.0 (0.22)<br>$I_2$ : 8.3 (0.24)                                            |
| <b>Papakonstantinou 2018</b>      | VAS (0-10)     | Biweekly average     | $I_1$ : 7.84 (1.58)<br>$I_2$ : 7.72 (1.99)                                          |
| Meal distribution                 |                |                      |                                                                                     |
| <b>Jakubowicz 2013</b>            | VAS (0-100 mm) | Week 2               | Mean daily satiety levels in BF group were 31% higher than D group ( $p < 0.0001$ ) |

**Note.** eTable 7 details the reported mean (SD) for satiety as measured using the detailed measuring tool. SD = Standard deviation, C = control group,  $I_1$  = first intervention group,  $I_2$  = second intervention group

### eTable 8: Notable clinical trials excluded

| Clinical Trial Number      | Intervention           | Year | Stage of completion | Notes                                                     |
|----------------------------|------------------------|------|---------------------|-----------------------------------------------------------|
| <b>ACTRN12620000453987</b> | Time-restricted eating | 2020 | Completed           | Full text not found<br><br>No anthropometric measurements |

|                            |                        |      |                       |                                                |
|----------------------------|------------------------|------|-----------------------|------------------------------------------------|
| <b>ACTRN12613000935730</b> | Time-restricted eating | 2013 | Completed             | Full text found<br>Wrong comparator            |
| <b>ChiCTR2000032048</b>    | Time-restricted eating | 2020 | Not yet recruiting    | Full text not found                            |
| <b>ChiCTR1800016271</b>    | Intermittent fasting   | 2018 | Recruiting            | Full text not found                            |
| <b>ChiCTR2200058929</b>    | Breakfast skipping     | 2022 | Not yet recruiting    | Full text not found                            |
| <b>ChiCTR2100052582</b>    | Time-restricted eating | 2021 | Recruiting            | Full text not found                            |
| <b>ChiCTR2100052876</b>    | Time-restricted eating | 2021 | Recruiting            | Full text not found                            |
| <b>ChiCTR2100051792</b>    | Time-restricted eating | 2021 | Recruitment completed | Full text not found                            |
| <b>ChiCTR2000029797</b>    | Time-restricted eating | 2020 | Completed             | Full text found<br>Wrong intervention duration |
| <b>ChiCTR1800016104</b>    | Intermittent fasting   | 2018 | Not yet recruiting    | Full text not found                            |
| <b>ChiCTR1900025424</b>    | Intermittent fasting   | 2019 | Not approved          | Full text not found                            |
| <b>ChiCTR2000039115</b>    | Time-restricted eating | 2020 | Recruiting            | Wrong intervention duration                    |
| <b>ChiCTR2200056363</b>    | Time-restricted eating | 2022 | Not yet recruiting    | Full text not found                            |
| <b>ChiCTR2300067375</b>    | Time-restricted eating | 2023 | Not yet recruiting    | Full text not found                            |
| <b>ChiCTR2300074846</b>    | Time-restricted eating | 2023 | Not yet recruiting    | Full text not found                            |
| <b>CTRI/2022/02/040292</b> | Time-restricted eating | 2022 | Open to recruitment   | Full text not found                            |
| <b>CTRI/2022/06/043312</b> | Time-restricted eating | 2022 | Open to recruitment   | Wrong comparator                               |
| <b>CTRI/2022/11/047684</b> | Time-restricted eating | 2022 | Not yet recruiting    | Full text not found                            |
| <b>CTRI/2022/07/044356</b> | Time-restricted eating | 2022 | Closed to recruitment | Wrong comparator                               |

|                            |                                   |      |                         |                                         |
|----------------------------|-----------------------------------|------|-------------------------|-----------------------------------------|
| <b>DRKS00031928</b>        | Time-restricted eating            | 2023 | Recruiting              | Full text not found                     |
| <b>DRKS00028261</b>        | Time-restricted eating            | 2022 | Recruiting              | Full text not found                     |
| <b>IRCT2012102911307N1</b> | Meal frequency                    | 2012 | Completed               | Full text included (Zargaran 2014)      |
| <b>KCT0005390</b>          | Time-restricted eating            | 2020 | Recruiting              | Full text not found                     |
| <b>NCT02525419</b>         | High-protein intermittent fasting | 2015 | Completed               | Full text found<br>Wrong intervention   |
| <b>NCT05742165</b>         | Time-restricted eating            | 2023 | Recruiting              | Full text not found                     |
| <b>NCT02948517</b>         | Time-restricted eating            | 2016 | Completed               | Full text found<br>Wrong study design   |
| <b>NCT05581862</b>         | Meal frequency                    | 2022 | Completed               | Full text not found                     |
| <b>NCT03571048</b>         | Time-restricted eating            | 2018 | Completed               | Full text included (Thomas 2022)        |
| <b>NCT03745612</b>         | Time-restricted eating            | 2018 | Completed               | Full text included (Liu 2022)           |
| <b>NCT03792282</b>         | Time-restricted eating            | 2019 | Completed               | Full text not found<br>Wrong comparator |
| <b>NCT04692532</b>         | Time-restricted eating            | 2021 | Enrolling by invitation | Full text not found                     |
| <b>NCT05548517</b>         | Time-restricted eating            | 2022 | Recruiting              | Full text not found                     |
| <b>NCT04916730</b>         | Time-restricted eating            | 2021 | Recruiting              | Full text not found                     |
| <b>NCT05870982</b>         | Time-restricted eating            | 2023 | Not yet recruiting      | Full text not found                     |
| <b>NCT05880095</b>         | Time-restricted eating            | 2023 | Recruiting              | Full text not found                     |
| <b>NCT05629858</b>         | Time-restricted eating            | 2023 | Enrolling by invitation | Full text not found                     |
| <b>NCT04127994</b>         | Meal frequency                    | 2019 | Recruiting              | Full text not found                     |
| <b>NCT01178723</b>         | Meal distribution                 | 2010 | Unknown status          | Full text not found                     |

|                    |                        |      |                        |                                           |
|--------------------|------------------------|------|------------------------|-------------------------------------------|
| <b>NCT03689608</b> | Intermittent fasting   | 2018 | Completed              | Full text found<br>Wrong intervention     |
| <b>NCT04155619</b> | Time-restricted eating | 2019 | Recruiting             | No anthropometric measurements            |
| <b>NCT04997486</b> | Time-restricted eating | 2021 | Active, not recruiting | No anthropometric measurements            |
| <b>NCT04243746</b> | Time-restricted eating | 2020 | Completed              | Full text not found                       |
| <b>NCT04057339</b> | Time-restricted eating | 2019 | Active, not recruiting | Full text not found                       |
| <b>NCT05220956</b> | Time-restricted eating | 2022 | Recruiting             | No anthropometric measurements            |
| <b>NCT04502329</b> | Time-restricted eating | 2020 | Completed              | Full text included (Kunduraci 2020)       |
| <b>NCT01277471</b> | Meal frequency         | 2011 | Completed              | Full text included (Kahleova 2014)        |
| <b>NCT01781780</b> | Breakfast skipping     | 2013 | Completed              | Full text included (Dhurandhar 2014)      |
| <b>NCT03393195</b> | Time-restricted eating | 2018 | Completed              | Full text included (Lowe 2020)            |
| <b>NCT03459703</b> | Time-restricted eating | 2018 | Completed              | Full text included (Jamshed 2022)         |
| <b>NCT03802253</b> | Time-restricted eating | 2019 | Recruiting             | Full text not found                       |
| <b>NCT04062773</b> | Time-restricted eating | 2019 | Unknown status         | Full text not found                       |
| <b>NCT04131647</b> | Intermittent fasting   | 2019 | Recruiting             | Full text not found<br>Wrong intervention |
| <b>NCT04534985</b> | Time-restricted eating | 2020 | Active, not recruiting | Full text not found                       |
| <b>NCT04557540</b> | Intermittent fasting   | 2020 | Recruiting             | Wrong comparator                          |
| <b>NCT05126199</b> | Time-restricted eating | 2021 | Recruiting             | Full text not found                       |

|                             |                        |      |                        |                                         |
|-----------------------------|------------------------|------|------------------------|-----------------------------------------|
| <b>NCT05225337</b>          | Time-restricted eating | 2022 | Completed              | Full text included (Pavlou 2023)        |
| <b>NCT05229835</b>          | Time-restricted eating | 2022 | Active, not recruiting | No anthropometric measurements          |
| <b>NCT05230160</b>          | Intermittent fasting   | 2022 | Not yet recruiting     | Wrong intervention                      |
| <b>NCT05290246</b>          | Time-restricted eating | 2022 | Recruiting             | Wrong comparator                        |
| <b>NCT05310721</b>          | Time-restricted eating | 2022 | Completed              | Full text included (Montero 2023)       |
| <b>NCT05549362</b>          | Time-restricted eating | 2022 | Recruiting             | No anthropometric measurements          |
| <b>NCT05730231</b>          | Time-restricted eating | 2022 | Active, not recruiting | Full text not found                     |
| <b>NCT05860413</b>          | Time-restricted eating | 2022 | Recruiting             | Wrong comparator                        |
| <b>NCT06018415</b>          | Time-restricted eating | 2023 | Not yet recruiting     | Full text not found                     |
| <b>NL9756</b>               | Time-restricted eating | 2021 | NA                     | Trial not found                         |
| <b>PACTR202301674821174</b> | Time-restricted eating | 2023 | Recruitment completed  | Full text not found                     |
| <b>RBR-3p8346g</b>          | Meal frequency         | 2021 | Not yet recruiting     | Full text not found                     |
| <b>RBR-45fpgqh</b>          | Time-restricted eating | 2023 | Recruiting             | Full text not found                     |
| <b>SLCTR/2018/001</b>       | Time-restricted eating | 2018 | Pending                | Full text not found                     |
| <b>TCTR20230131002</b>      | Time-restricted eating | 2023 | Recruitment completed  | Not yet published                       |
| <b>TCTR20210520002</b>      | Time-restricted eating | 2021 | Completed              | Full text included (Suthutvoravut 2023) |
| <b>UMIN000045481</b>        | Breakfast skipping     | 2021 | Recruitment suspended  | Full text not found                     |

**Note.** eTable 8 details the clinical trials excluded from the review at full text screening with current stage of completion and reason for exclusion.

|                                  | Bias arising from randomisation process | Bias due to deviations from intended interventions | Bias due to missing outcome data | Bias in measurement of the outcome | Bias in selection of the reported result | Overall bias |
|----------------------------------|-----------------------------------------|----------------------------------------------------|----------------------------------|------------------------------------|------------------------------------------|--------------|
| Bachman 2012                     | +                                       | +                                                  | +                                | -                                  | ?                                        | -            |
| Che 2021                         | +                                       | +                                                  | +                                | -                                  | ?                                        | -            |
| Chow 2020                        | -                                       | -                                                  | +                                | -                                  | ?                                        | -            |
| de Oliveira Maranhao Pureza 2021 | +                                       | +                                                  | +                                | ?                                  | +                                        | ?            |
| Dhurandhar 2014                  | +                                       | +                                                  | ?                                | -                                  | ?                                        | -            |
| Forslund 2008                    | +                                       | -                                                  | -                                | -                                  | ?                                        | -            |
| Grangeiro 2021                   | +                                       | -                                                  | -                                | -                                  | ?                                        | -            |
| Jakubowicz 2013                  | +                                       | -                                                  | -                                | -                                  | ?                                        | -            |
| Jakubowicz 2019                  | +                                       | ?                                                  | -                                | ?                                  | ?                                        | -            |
| Jamshed 2022                     | +                                       | +                                                  | +                                | ?                                  | +                                        | ?            |
| Kahleova 2014                    | +                                       | +                                                  | +                                | -                                  | ?                                        | -            |
| Kunduraci & Ozbek 2020           | +                                       | -                                                  | -                                | -                                  | ?                                        | -            |
| Lin 2023                         | +                                       | +                                                  | +                                | ?                                  | ?                                        | ?            |
| Liu 2022                         | +                                       | +                                                  | +                                | ?                                  | +                                        | ?            |
| Lombardo 2014                    | ?                                       | -                                                  | -                                | -                                  | ?                                        | -            |
| Lowe 2020                        | +                                       | +                                                  | +                                | ?                                  | +                                        | ?            |
| Madjd 2016                       | +                                       | +                                                  | +                                | -                                  | ?                                        | -            |
| Madjd 2021                       | +                                       | +                                                  | +                                | -                                  | ?                                        | -            |
| Manoogian 2022                   | +                                       | +                                                  | +                                | -                                  | ?                                        | -            |
| Montero 2023                     | +                                       |                                                    | +                                | -                                  | ?                                        | -            |
| Papakonstantinou 2016            | +                                       | ?                                                  | -                                | -                                  | ?                                        | -            |
| Papakonstantinou 2018a           | +                                       | ?                                                  | -                                | ?                                  | ?                                        | -            |
| Papakonstantinou 2018b           | +                                       | ?                                                  | -                                | ?                                  | ?                                        | -            |
| Pavlou 2023                      | +                                       | +                                                  | +                                | ?                                  | ?                                        | ?            |
| Philips 2021                     | +                                       | -                                                  | -                                | -                                  | -                                        | -            |
| Roman 2020                       | ?                                       | -                                                  | -                                | -                                  | ?                                        | -            |
| Suthutvoravut 2023               | ?                                       | +                                                  | +                                | -                                  | ?                                        | -            |
| Thomas 2022                      | +                                       | ?                                                  | +                                | -                                  | -                                        | -            |
| Wei 2023                         | +                                       | +                                                  | +                                | ?                                  | +                                        | ?            |
| Zargaran 2014                    | ?                                       | -                                                  | -                                | -                                  | ?                                        | -            |

**eFigure 1: Risk of summary for included studies.**

**Note.** eFigure 1 details the individual risk of each study included in the review by domain. green = low risk, yellow = some caution, red = high risk

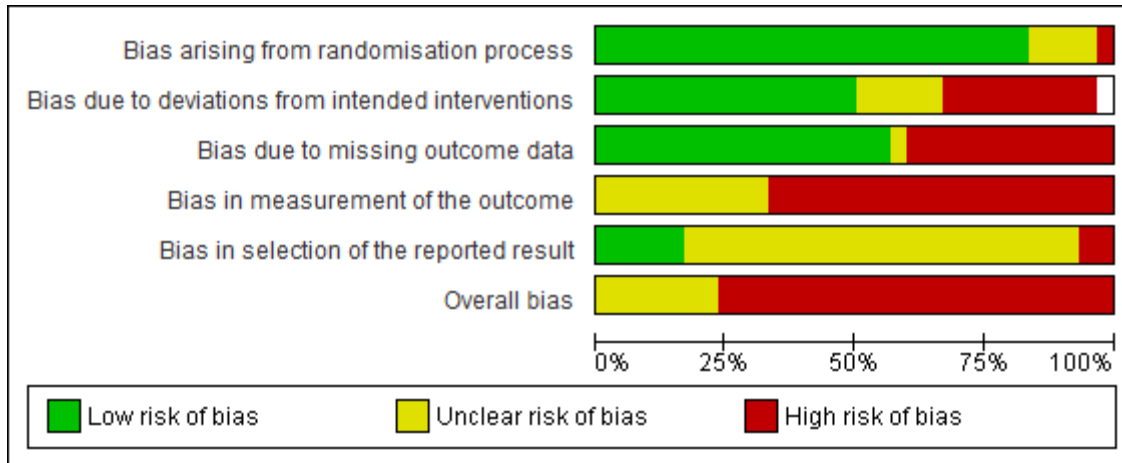

**eFigure 2: Risk of bias graph for included studies.**

**Note.** eFigure 2 details the overall risk of bias for all studies included in the review.

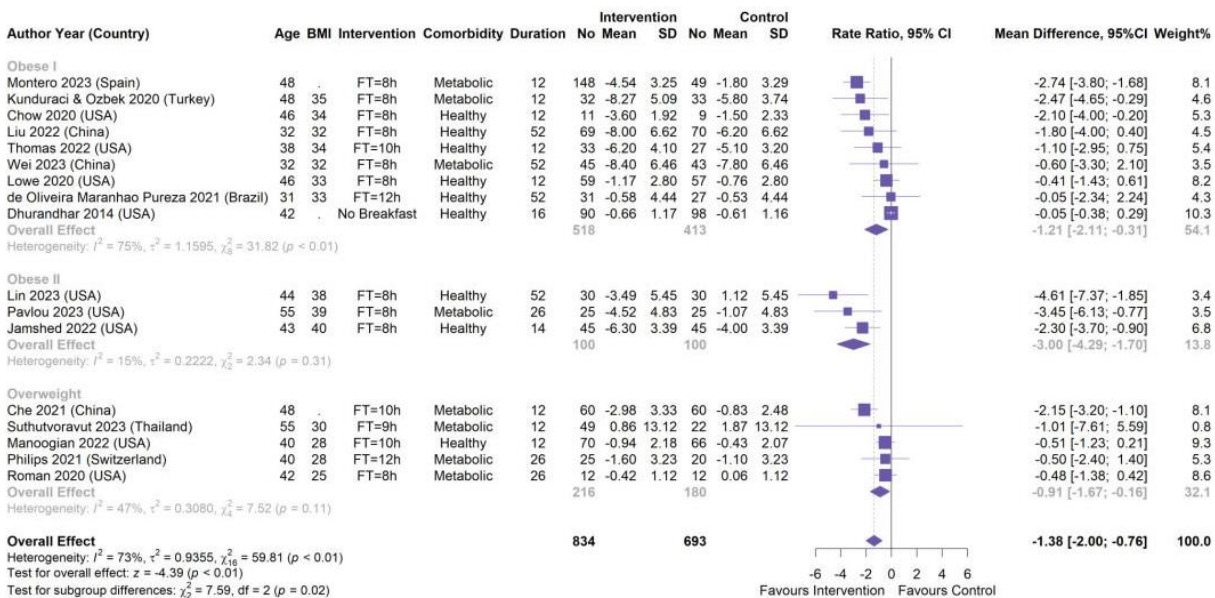

**eFigure 3: Meta-analysis of difference in mean difference (95% CIs) for the effect of time-restricted eating on weight (kg), grouped by baseline BMI status.**

BMI: Body Mass Index; SD: Standard Deviation; CI: Confidence Interval; USA: United States of America; FT: Feeding Time; Duration: follow-up duration in weeks; 2M/3M/6M: 2, 3 or 6 meals; 3M+2S: 3 meals and 2 snacks; 3M+3S: 3 meals and 3 snacks; 10S: Grazing diet – 100kcal every 2-3 hours; HCB: High Calorie Breakfast; HCD: High Calorie Dinner; ED: Early Dinner; LD: Late Dinner; FL: Front Loading; EED: Equal Energy Distribution; ML: Middle Loading; BL: Back Loading.

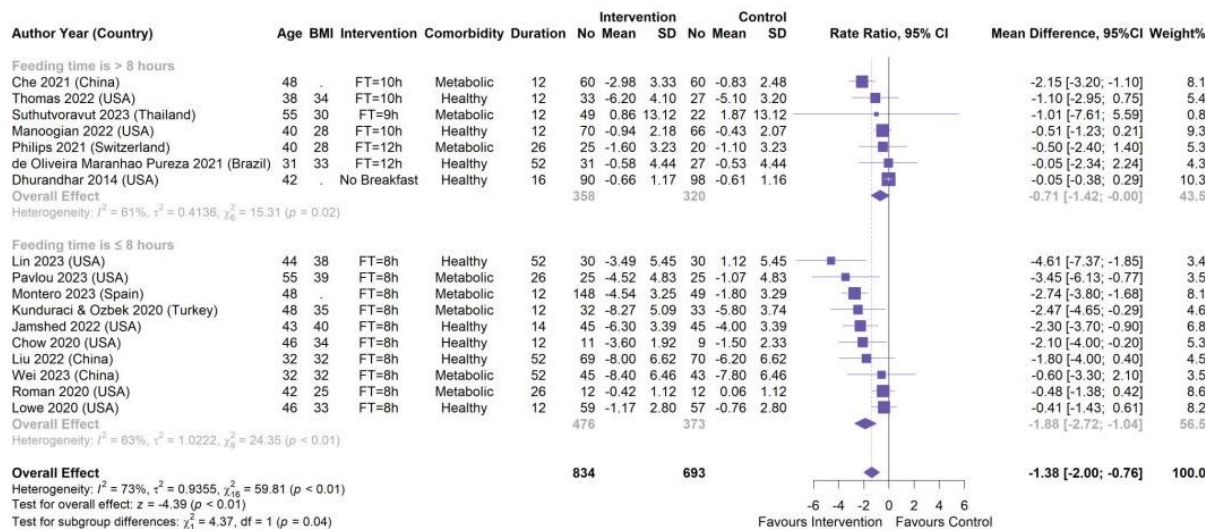

**eFigure 4: Meta-analysis of difference in mean difference (95% CIs) for the effect of time-restricted eating interventions on weight (kg), grouped by eating window.**

BMI: Body Mass Index; SD: Standard Deviation; CI: Confidence Interval; USA: United States of America; FT: Feeding Time; Duration: follow-up duration in weeks; 2M/3M/6M: 2, 3 or 6 meals; 3M+2S: 3 meals and 2 snacks; 3M+3S: 3 meals and 3 snacks; 10S: Grazing diet – 100kcal every 2-3 hours; HCB: High Calorie Breakfast; HCD: High Calorie Dinner; ED: Early Dinner; LD: Late Dinner; FL: Front Loading; EED: Equal Energy Distribution; ML: Middle Loading; BL: Back Loading.

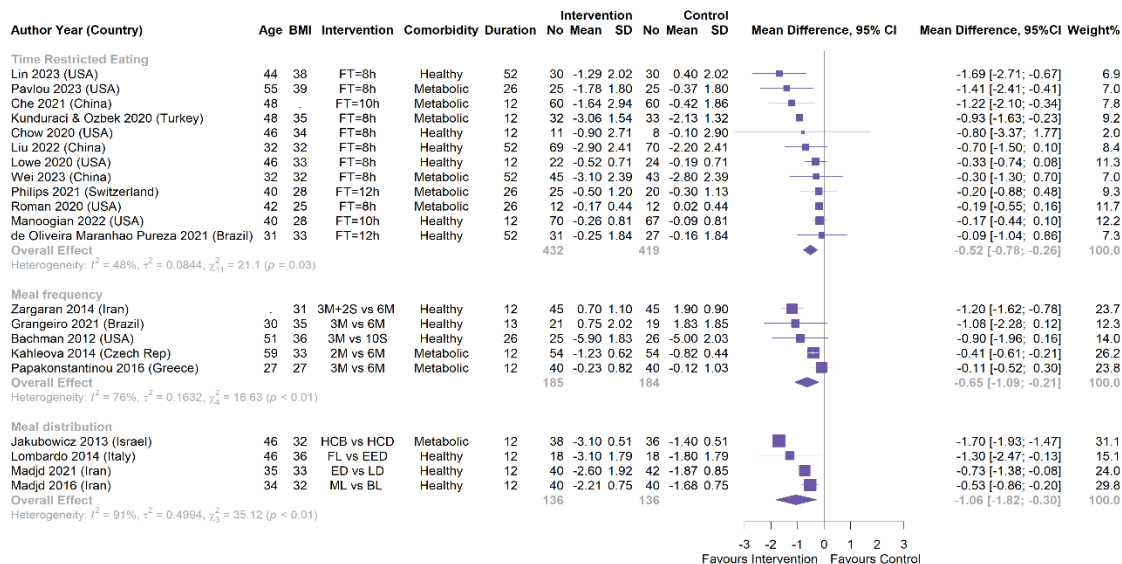

**eFigure 5: Meta-analysis of difference in mean difference (95% CIs) for the effect of meal timing interventions on BMI (kg/m<sup>2</sup>), grouped by intervention type.**

BMI: Body Mass Index; SD: Standard Deviation; CI: Confidence Interval; USA: United States of America; FT: Feeding Time; Duration: follow-up duration in weeks; 2M/3M/6M: 2, 3 or 6 meals; 3M+2S: 3 meals and 2 snacks; 3M+3S: 3 meals and 3 snacks; 10S: Grazing diet – 100kcal every 2-3 hours; HCB: High Calorie Breakfast; HCD: High Calorie Dinner; ED: Early Dinner; LD: Late Dinner; FL: Front Loading; EED: Equal Energy Distribution; ML: Middle Loading; BL: Back Loading.



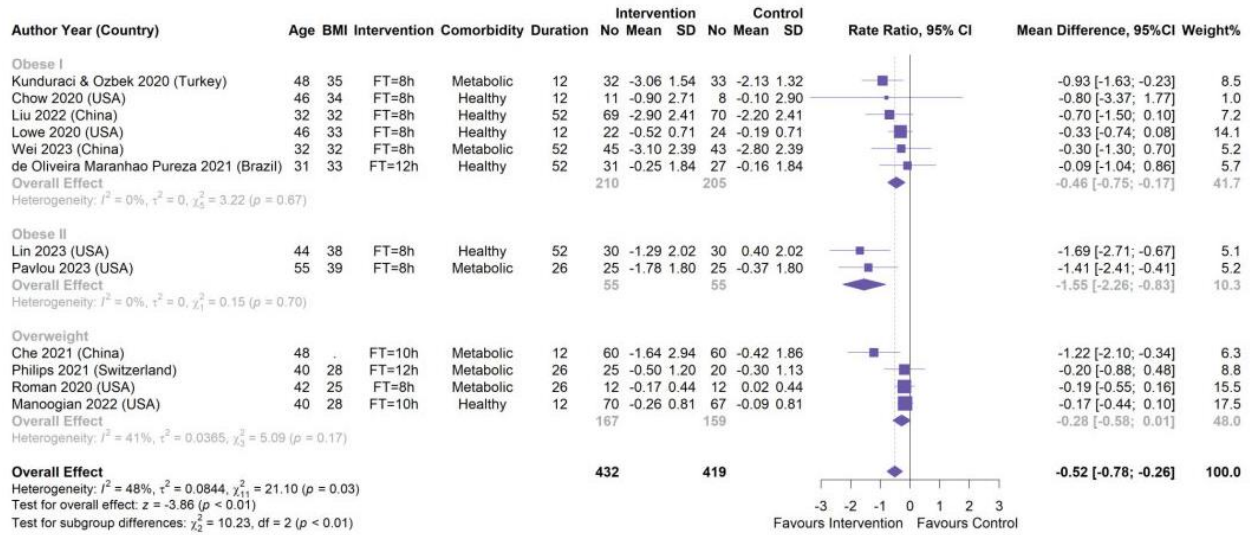

**eFigure 6: Meta-analysis of difference in mean difference (95% CIs) for the effect of time-restricted eating on BMI (kg/m<sup>2</sup>), grouped by baseline BMI status.**

BMI: Body Mass Index; SD: Standard Deviation; CI: Confidence Interval; USA: United States of America; FT: Feeding Time; Duration: follow-up duration in weeks; 2M/3M/6M: 2, 3 or 6 meals; 3M+2S: 3 meals and 2 snacks; 3M+3S: 3 meals and 3 snacks; 10S: Grazing diet – 100kcal every 2-3 hours; HCB: High Calorie Breakfast; HCD: High Calorie Dinner; ED: Early Dinner; LD: Late Dinner; FL: Front Loading; EED: Equal Energy Distribution; ML: Middle Loading; BL: Back Loading.

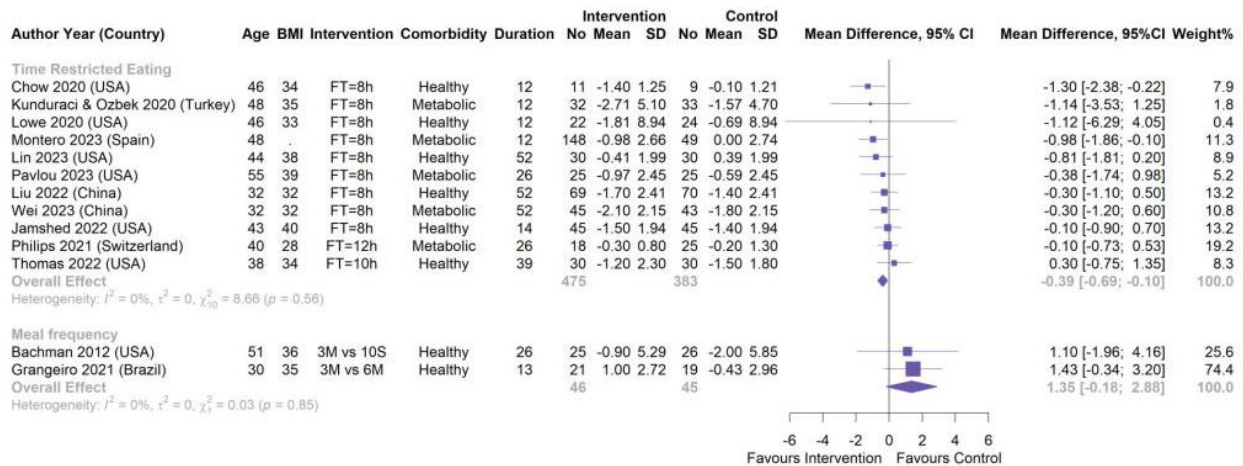

**eFigure 7: Meta-analysis of difference in mean difference (95% CIs) for the effect of meal timing interventions on lean mass (kg), grouped by the nature of the meal timing intervention.**

BMI: Body Mass Index; SD: Standard Deviation; CI: Confidence Interval; USA: United States of America; FT: Feeding Time; Duration: follow-up duration in weeks; 2M/3M/6M: 2, 3 or 6 meals; 3M+2S: 3 meals and 2 snacks; 3M+3S: 3 meals and 3 snacks; 10S: Grazing diet – 100kcal every 2-3 hours; HCB: High Calorie Breakfast; HCD: High Calorie Dinner; ED: Early Dinner; LD: Late Dinner; FL: Front Loading; EED: Equal Energy Distribution; ML: Middle Loading; BL: Back Loading.

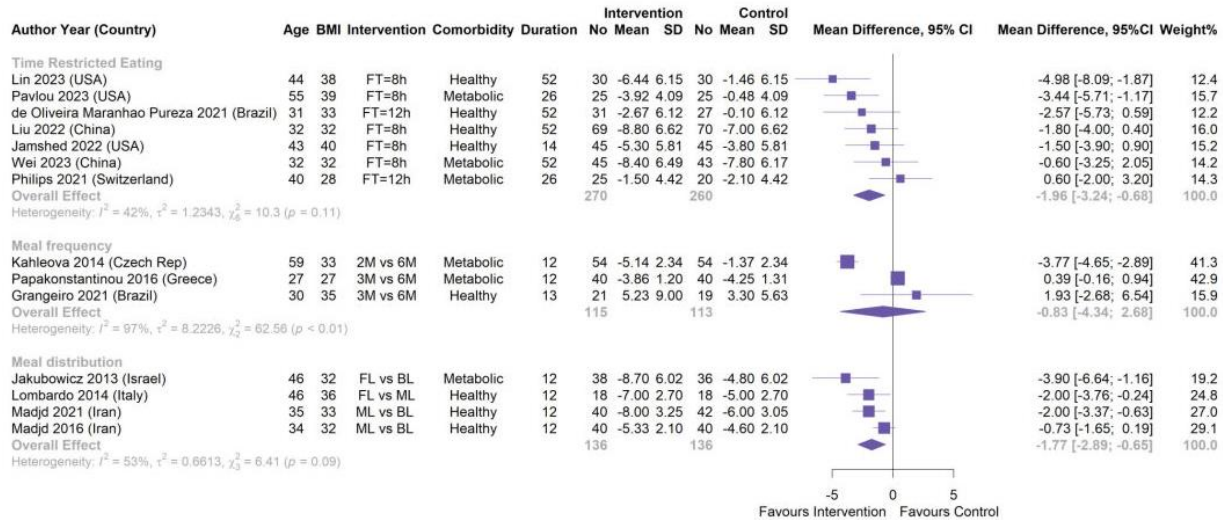

**eFigure 8: Meta-analysis of difference in mean difference (95% CIs) for the effect of meal timing interventions on waist circumference (cm), grouped by meal timing intervention.**

BMI: Body Mass Index; SD: Standard Deviation; CI: Confidence Interval; USA: United States of America; FT: Feeding Time; Duration: follow-up duration in weeks; 2M/3M/6M: 2, 3 or 6 meals; 3M+2S: 3 meals and 2 snacks; 3M+3S: 3 meals and 3 snacks; 10S: Grazing diet – 100kcal every 2-3 hours; HCB: High Calorie Breakfast; HCD: High Calorie Dinner; ED: Early Dinner; LD: Late Dinner; FL: Front Loading; EED: Equal Energy Distribution; ML: Middle Loading; BL: Back Loading.

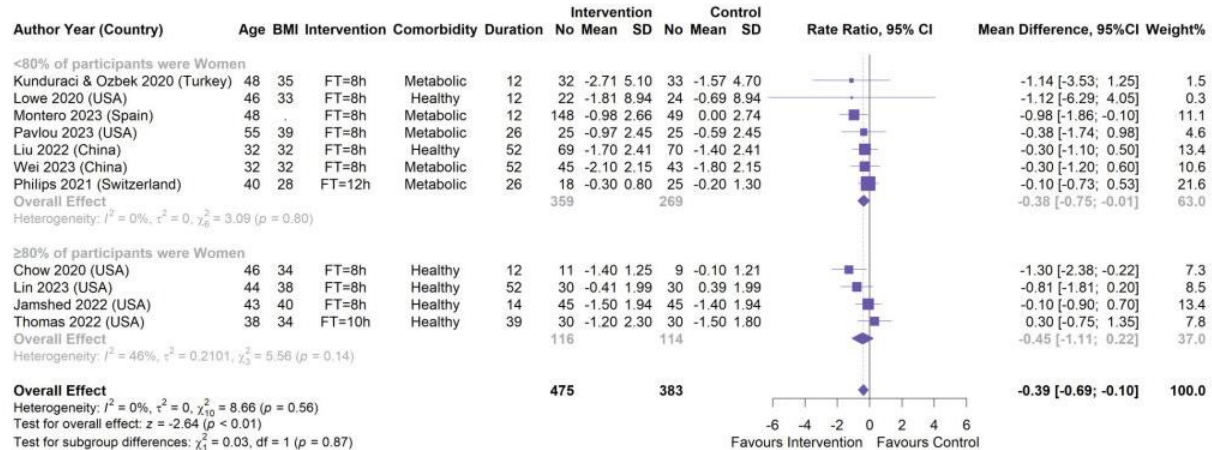

**eFigure 9: Meta-analysis of difference in mean difference (95% CIs) for the effect of time-restricted eating on lean mass (kg), grouped by gender proportion.**

BMI: Body Mass Index; SD: Standard Deviation; CI: Confidence Interval; USA: United States of America; FT: Feeding Time; Duration: follow-up duration in weeks; 2M/3M/6M: 2, 3 or 6 meals; 3M+2S: 3 meals and 2 snacks; 3M+3S: 3 meals and 3 snacks; 10S: Grazing diet – 100kcal every 2-3 hours; HCB: High Calorie Breakfast; HCD: High Calorie Dinner; ED: Early Dinner; LD: Late Dinner; FL: Front Loading; EED: Equal Energy Distribution; ML: Middle Loading; BL: Back Loading.

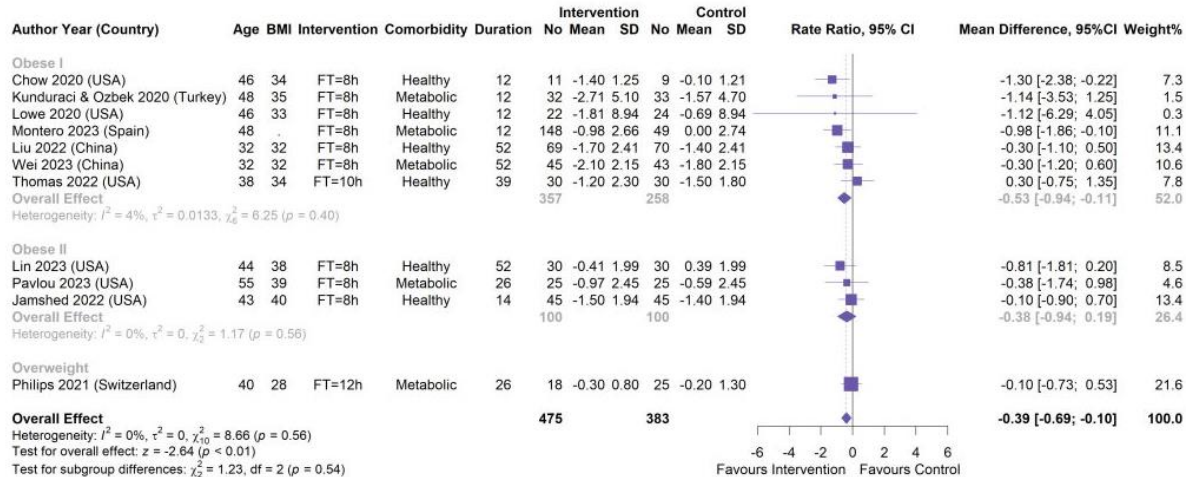

**eFigure 10: Meta-analysis of difference in mean difference (95% CIs) for the effect of time-restricted eating on lean mass (kg), grouped by baseline BMI status.**

BMI: Body Mass Index; SD: Standard Deviation; CI: Confidence Interval; USA: United States of America; FT: Feeding Time; Duration: follow-up duration in weeks; 2M/3M/6M: 2, 3 or 6 meals; 3M+2S: 3 meals and 2 snacks; 3M+3S: 3 meals and 3 snacks; 10S: Grazing diet – 100kcal every 2-3 hours; HCB: High Calorie Breakfast; HCD: High Calorie Dinner; ED: Early Dinner; LD: Late Dinner; FL: Front Loading; EED: Equal Energy Distribution; ML: Middle Loading; BL: Back Loading.

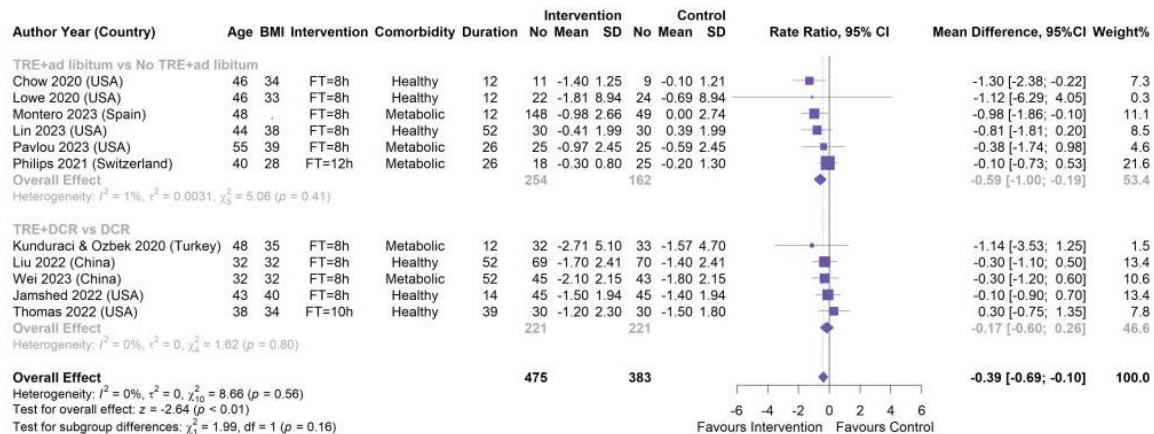

**eFigure 11: Meta-analysis of difference in mean difference (95% CIs) for the effect of time-restricted eating on lean mass (kg), grouped by energy prescription.**

BMI: Body Mass Index; SD: Standard Deviation; CI: Confidence Interval; USA: United States of America; FT: Feeding Time; Duration: follow-up duration in weeks; 2M/3M/6M: 2, 3 or 6 meals; 3M+2S: 3 meals and 2 snacks; 3M+3S: 3 meals and 3 snacks; 10S: Grazing diet – 100kcal every 2-3 hours; HCB: High Calorie Breakfast; HCD: High Calorie Dinner; ED: Early Dinner; LD: Late Dinner; FL: Front Loading; EED: Equal Energy Distribution; ML: Middle Loading; BL: Back Loading.

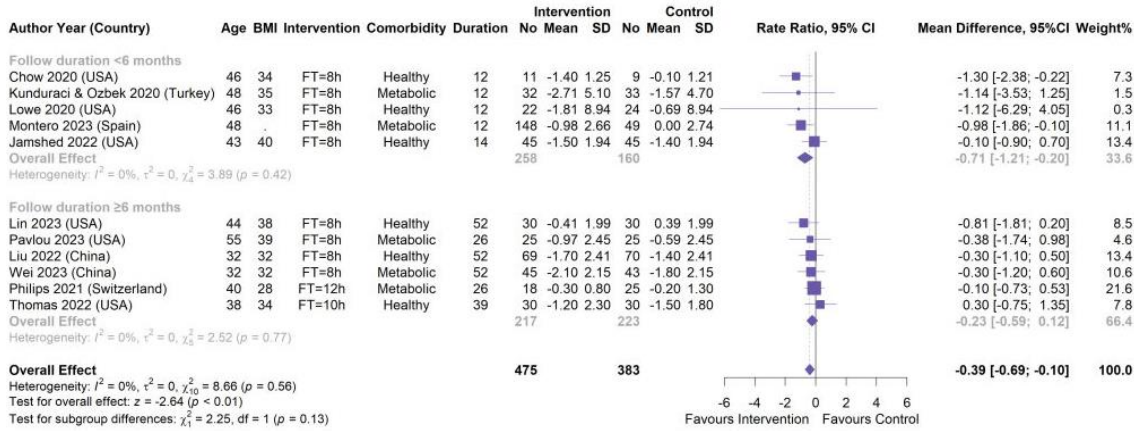

**eFigure 12: Meta-analysis of difference in mean difference (95% CIs) for the effect of time-restricted eating on lean mass (kg), grouped by follow duration.**

BMI: Body Mass Index; SD: Standard Deviation; CI: Confidence Interval; USA: United States of America; FT: Feeding Time; Duration: follow-up duration in weeks; 2M/3M/6M: 2, 3 or 6 meals; 3M+2S: 3 meals and 2 snacks; 3M+3S: 3 meals and 3 snacks; 10S: Grazing diet – 100kcal every 2-3 hours; HCB: High Calorie Breakfast; HCD: High Calorie Dinner; ED: Early Dinner; LD: Late Dinner; FL: Front Loading; EED: Equal Energy Distribution; ML: Middle Loading; BL: Back Loading.

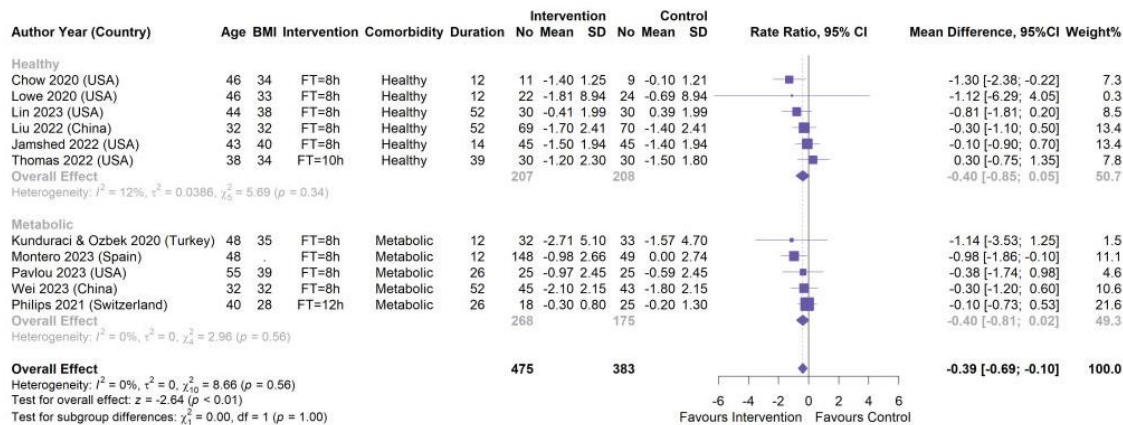

**eFigure 13: Meta-analysis of difference in mean difference (95% CIs) for the effect of time-restricted eating on lean mass (kg), grouped by health status.**

BMI: Body Mass Index; SD: Standard Deviation; CI: Confidence Interval; USA: United States of America; FT: Feeding Time; Duration: follow-up duration in weeks; 2M/3M/6M: 2, 3 or 6 meals; 3M+2S: 3 meals and 2 snacks; 3M+3S: 3 meals and 3 snacks; 10S: Grazing diet – 100kcal every 2-3 hours; HCB: High Calorie Breakfast; HCD: High Calorie Dinner; ED: Early Dinner; LD: Late Dinner; FL: Front Loading; EED: Equal Energy Distribution; ML: Middle Loading; BL: Back Loading.

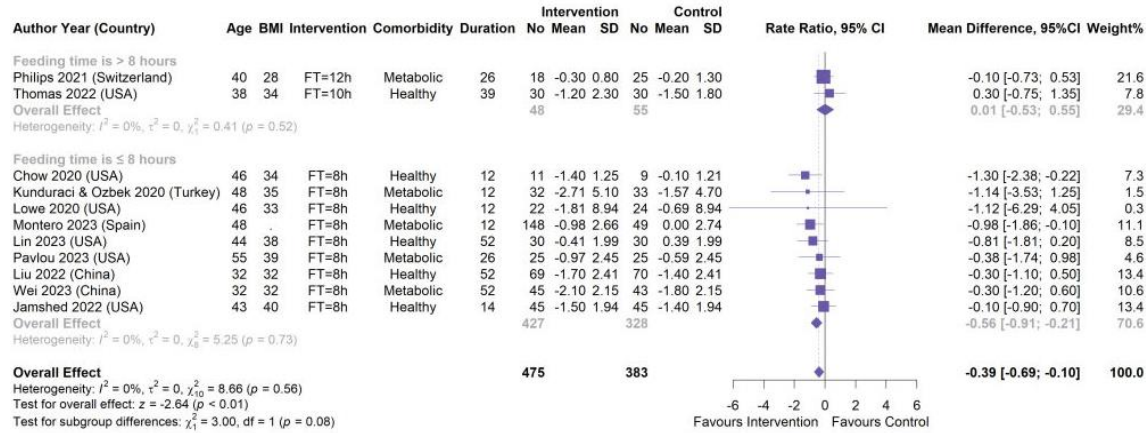

**eFigure 14: Meta-analysis of difference in mean difference (95% CIs) for the effect of time-restricted eating on lean mass (kg), grouped by eating window.**

BMI: Body Mass Index; SD: Standard Deviation; CI: Confidence Interval; USA: United States of America; FT: Feeding Time; Duration: follow-up duration in weeks; 2M/3M/6M: 2, 3 or 6 meals; 3M+2S: 3 meals and 2 snacks; 3M+3S: 3 meals and 3 snacks; 10S: Grazing diet – 100kcal every 2-3 hours; HCB: High Calorie Breakfast; HCD: High Calorie Dinner; ED: Early Dinner; LD: Late Dinner; FL: Front Loading; EED: Equal Energy Distribution; ML: Middle Loading; BL: Back Loading.

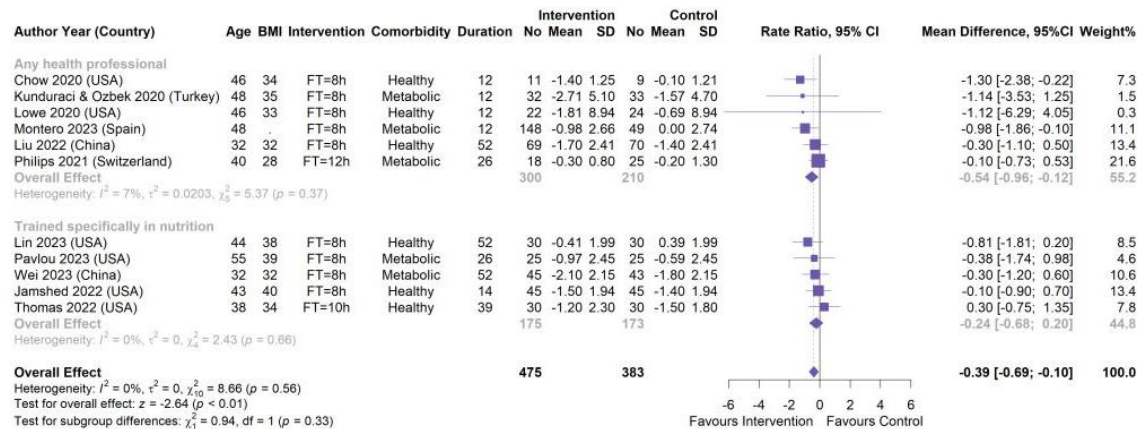

**eFigure 15: Meta-analysis of difference in mean difference (95% CIs) for the effect of time-restricted eating on lean mass (kg), grouped by delivery personnel.**

BMI: Body Mass Index; SD: Standard Deviation; CI: Confidence Interval; USA: United States of America; FT: Feeding Time; Duration: follow-up duration in weeks; 2M/3M/6M: 2, 3 or 6 meals; 3M+2S: 3 meals and 2 snacks; 3M+3S: 3 meals and 3 snacks; 10S: Grazing diet – 100kcal every 2-3 hours; HCB: High Calorie Breakfast; HCD: High Calorie Dinner; ED: Early Dinner; LD: Late Dinner; FL: Front Loading; EED: Equal Energy Distribution; ML: Middle Loading; BL: Back Loading.

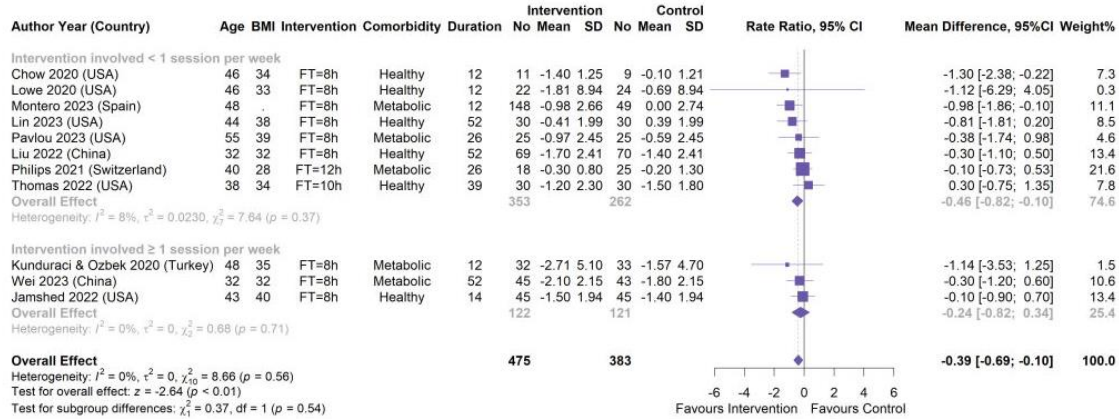

**eFigure 16: Meta-analysis of difference in mean difference (95% CIs) for the effect of time-restricted eating on lean mass (kg), grouped by frequency of contact.**

BMI: Body Mass Index; SD: Standard Deviation; CI: Confidence Interval; USA: United States of America; FT: Feeding Time; Duration: follow-up duration in weeks; 2M/3M/6M: 2, 3 or 6 meals; 3M+2S: 3 meals and 2 snacks; 3M+3S: 3 meals and 3 snacks; 10S: Grazing diet – 100kcal every 2-3 hours; HCB: High Calorie Breakfast; HCD: High Calorie Dinner; ED: Early Dinner; LD: Late Dinner; FL: Front Loading; EED: Equal Energy Distribution; ML: Middle Loading; BL: Back Loading.

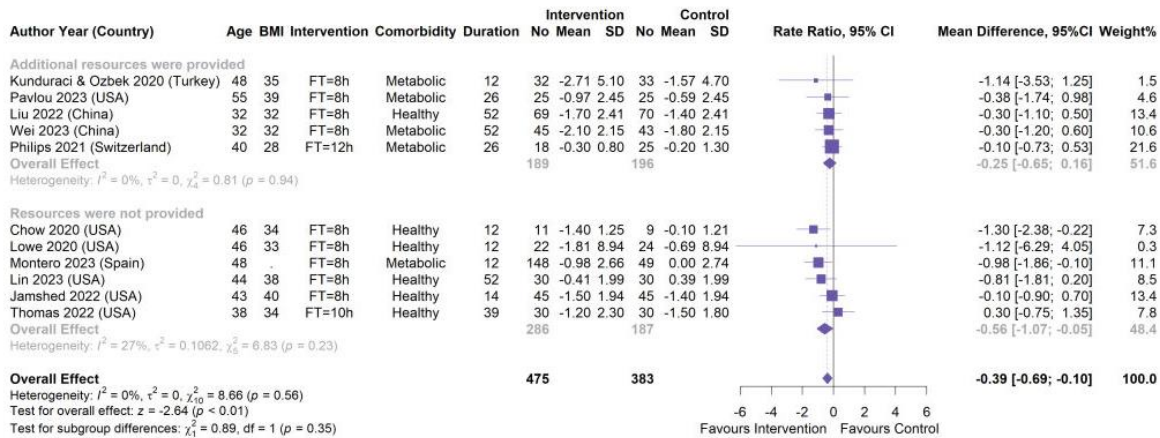

**eFigure 17: Meta-analysis of difference in mean difference (95% CIs) for the effect of time-restricted eating on lean mass (kg), grouped by resource provision.**

BMI: Body Mass Index; SD: Standard Deviation; CI: Confidence Interval; USA: United States of America; FT: Feeding Time; Duration: follow-up duration in weeks; 2M/3M/6M: 2, 3 or 6 meals; 3M+2S: 3 meals and 2 snacks; 3M+3S: 3 meals and 3 snacks; 10S: Grazing diet – 100kcal every 2-3 hours; HCB: High Calorie Breakfast; HCD: High Calorie Dinner; ED: Early Dinner; LD: Late Dinner; FL: Front Loading; EED: Equal Energy Distribution; ML: Middle Loading; BL: Back Loading.

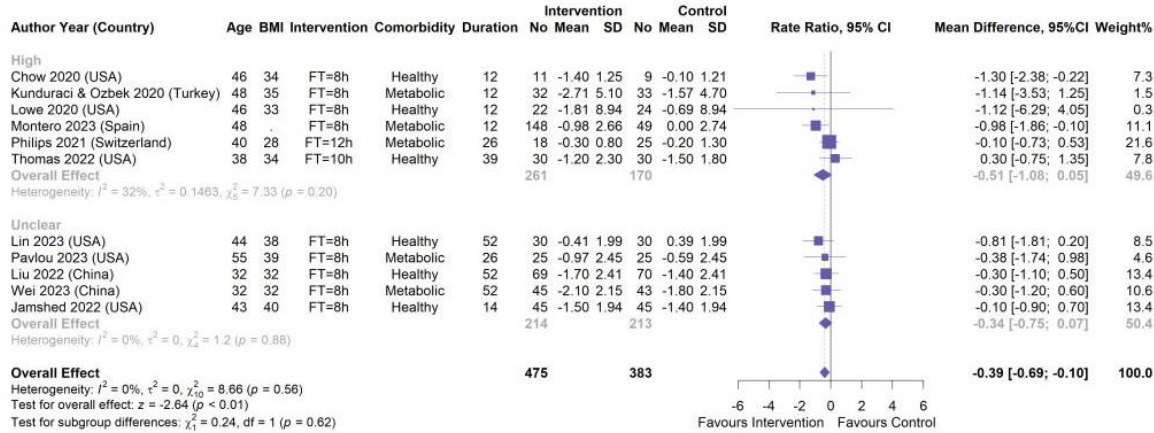

**eFigure 18: Meta-analysis of difference in mean difference (95% CIs) for the effect of time-restricted eating on lean mass (kg), grouped by risk of bias.**

BMI: Body Mass Index; SD: Standard Deviation; CI: Confidence Interval; USA: United States of America; FT: Feeding Time; Duration: follow-up duration in weeks; 2M/3M/6M: 2, 3 or 6 meals; 3M+2S: 3 meals and 2 snacks; 3M+3S: 3 meals and 3 snacks; 10S: Grazing diet – 100kcal every 2-3 hours; HCB: High Calorie Breakfast; HCD: High Calorie Dinner; ED: Early Dinner; LD: Late Dinner; FL: Front Loading; EED: Equal Energy Distribution; ML: Middle Loading; BL: Back Loading.

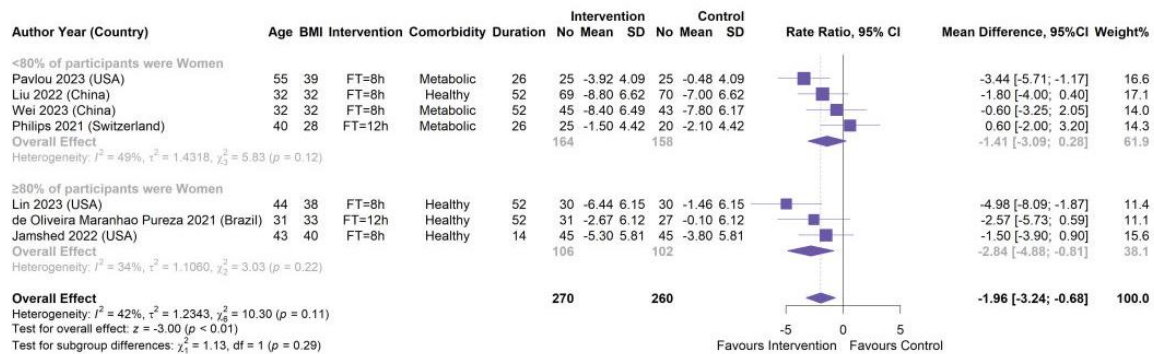

**eFigure 19: Meta-analysis of difference in mean difference (95% CIs) for the effect of time-restricted eating on waist circumference (cm), grouped by gender proportion.**

BMI: Body Mass Index; SD: Standard Deviation; CI: Confidence Interval; USA: United States of America; FT: Feeding Time; Duration: follow-up duration in weeks; 2M/3M/6M: 2, 3 or 6 meals; 3M+2S: 3 meals and 2 snacks; 3M+3S: 3 meals and 3 snacks; 10S: Grazing diet – 100kcal every 2-3 hours; HCB: High Calorie Breakfast; HCD: High Calorie Dinner; ED: Early Dinner; LD: Late Dinner; FL: Front Loading; EED: Equal Energy Distribution; ML: Middle Loading; BL: Back Loading.

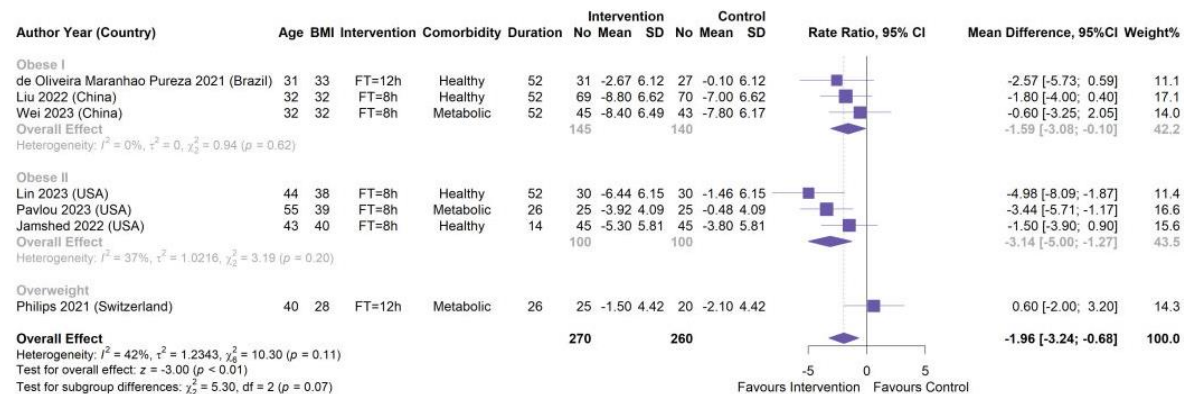

### eFigure 20: Meta-analysis of difference in mean difference (95% CIs) for the effect of time-restricted eating on waist circumference (cm), grouped by baseline BMI status.

BMI: Body Mass Index; SD: Standard Deviation; CI: Confidence Interval; USA: United States of America; FT: Feeding Time; Duration: follow-up duration in weeks; 2M/3M/6M: 2, 3 or 6 meals; 3M+2S: 3 meals and 2 snacks; 3M+3S: 3 meals and 3 snacks; 10S: Grazing diet – 100kcal every 2-3 hours; HCB: High Calorie Breakfast; HCD: High Calorie Dinner; ED: Early Dinner; LD: Late Dinner; FL: Front Loading; EED: Equal Energy Distribution; ML: Middle Loading; BL: Back Loading.

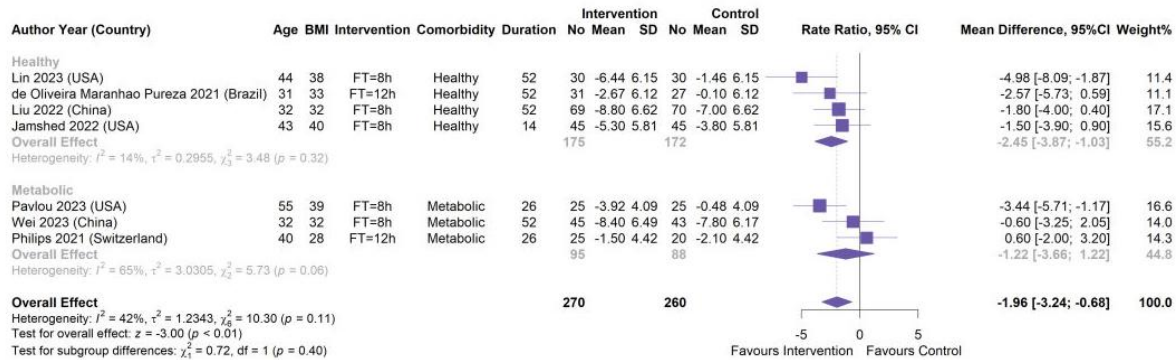

### eFigure 21: Meta-analysis of difference in mean difference (95% CIs) for the effect of time-restricted eating on waist circumference (cm), grouped by health status.

BMI: Body Mass Index; SD: Standard Deviation; CI: Confidence Interval; USA: United States of America; FT: Feeding Time; Duration: follow-up duration in weeks; 2M/3M/6M: 2, 3 or 6 meals; 3M+2S: 3 meals and 2 snacks; 3M+3S: 3 meals and 3 snacks; 10S: Grazing diet – 100kcal every 2-3 hours; HCB: High Calorie Breakfast; HCD: High Calorie Dinner; ED: Early Dinner; LD: Late Dinner; FL: Front Loading; EED: Equal Energy Distribution; ML: Middle Loading; BL: Back Loading.

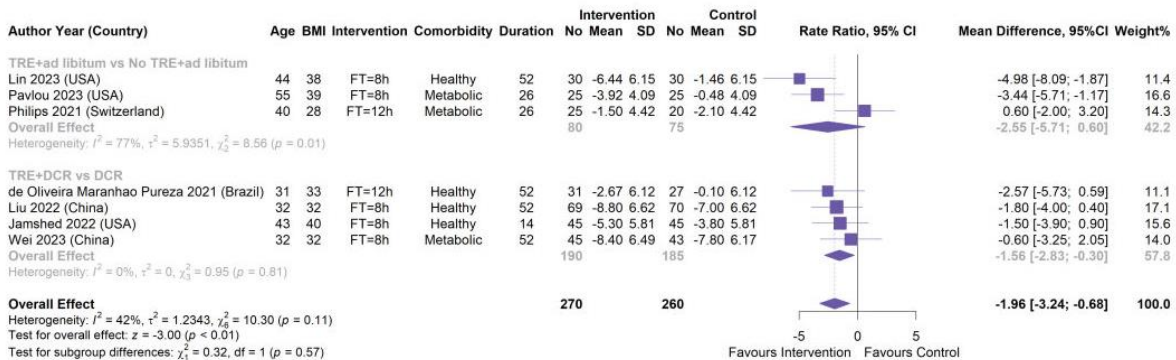

### eFigure 22: Meta-analysis of difference in mean difference (95% CIs) for the effect of time-restricted eating on waist circumference (cm), grouped by energy prescription.

BMI: Body Mass Index; SD: Standard Deviation; CI: Confidence Interval; USA: United States of America; FT: Feeding Time; Duration: follow-up duration in weeks; 2M/3M/6M: 2, 3 or 6 meals; 3M+2S: 3 meals and 2 snacks; 3M+3S: 3 meals and 3 snacks; 10S: Grazing diet – 100kcal every 2-3 hours; HCB: High Calorie Breakfast; HCD: High Calorie Dinner; ED: Early Dinner; LD: Late Dinner; FL: Front Loading; EED: Equal Energy Distribution; ML: Middle Loading; BL: Back Loading.



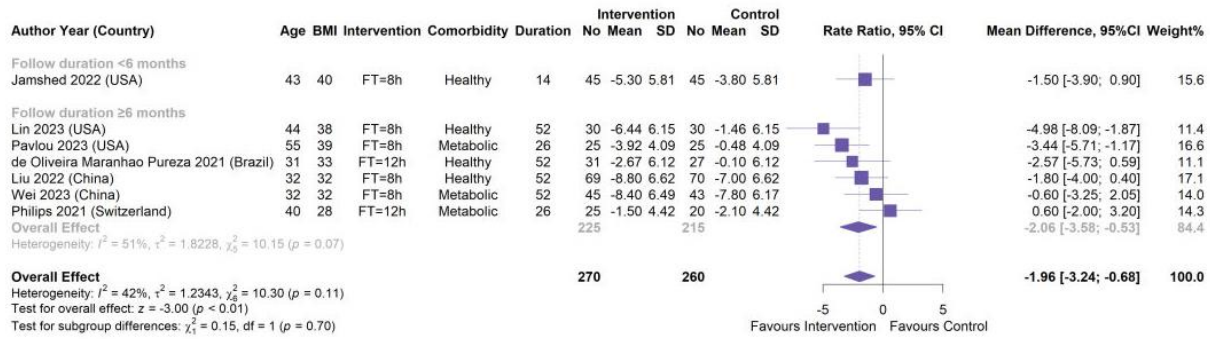

**eFigure 23: Meta-analysis of difference in mean difference (95% CIs) for the effect of time-restricted eating on waist circumference (cm), grouped by follow duration.**

BMI: Body Mass Index; SD: Standard Deviation; CI: Confidence Interval; USA: United States of America; FT: Feeding Time; Duration: follow-up duration in weeks; 2M/3M/6M: 2, 3 or 6 meals; 3M+2S: 3 meals and 2 snacks; 3M+3S: 3 meals and 3 snacks; 10S: Grazing diet – 100kcal every 2-3 hours; HCB: High Calorie Breakfast; HCD: High Calorie Dinner; ED: Early Dinner; LD: Late Dinner; FL: Front Loading; EED: Equal Energy Distribution; ML: Middle Loading; BL: Back Loading.

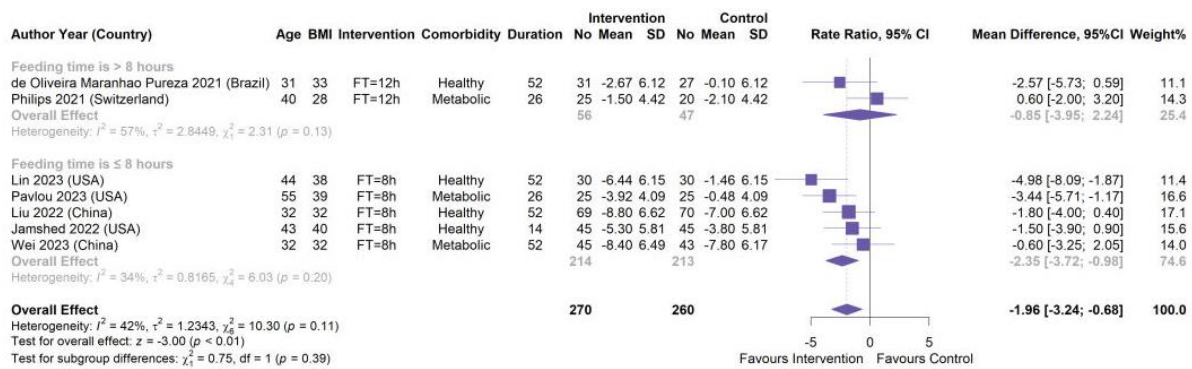

**eFigure 24: Meta-analysis of difference in mean difference (95% CIs) for the effect of time-restricted eating on waist circumference (cm), grouped by eating window.**

BMI: Body Mass Index; SD: Standard Deviation; CI: Confidence Interval; USA: United States of America; FT: Feeding Time; Duration: follow-up duration in weeks; 2M/3M/6M: 2, 3 or 6 meals; 3M+2S: 3 meals and 2 snacks; 3M+3S: 3 meals and 3 snacks; 10S: Grazing diet – 100kcal every 2-3 hours; HCB: High Calorie Breakfast; HCD: High Calorie Dinner; ED: Early Dinner; LD: Late Dinner; FL: Front Loading; EED: Equal Energy Distribution; ML: Middle Loading; BL: Back Loading.

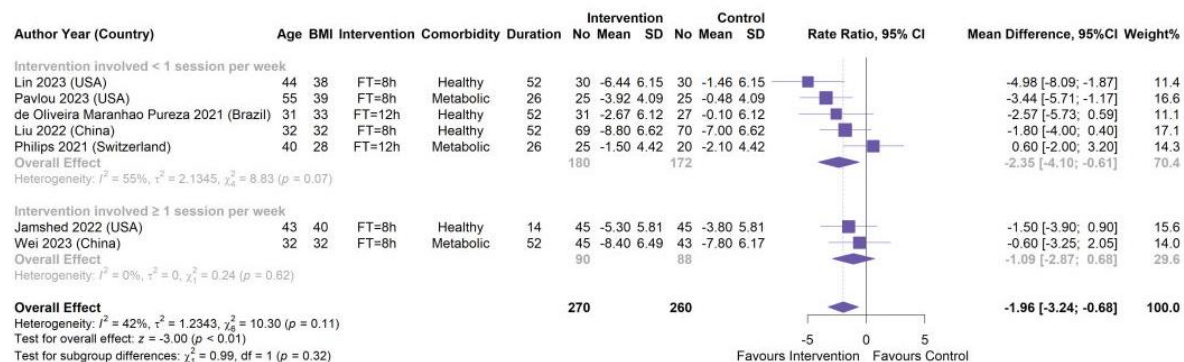

### eFigure 25: Meta-analysis of difference in mean difference (95% CIs) for the effect of time-restricted eating on waist circumference (cm), grouped by frequency of contact.

BMI: Body Mass Index; SD: Standard Deviation; CI: Confidence Interval; USA: United States of America; FT: Feeding Time; Duration: follow-up duration in weeks; 2M/3M/6M: 2, 3 or 6 meals; 3M+2S: 3 meals and 2 snacks; 3M+3S: 3 meals and 3 snacks; 10S: Grazing diet – 100kcal every 2-3 hours; HCB: High Calorie Breakfast; HCD: High Calorie Dinner; ED: Early Dinner; LD: Late Dinner; FL: Front Loading; EED: Equal Energy Distribution; ML: Middle Loading; BL: Back Loading.

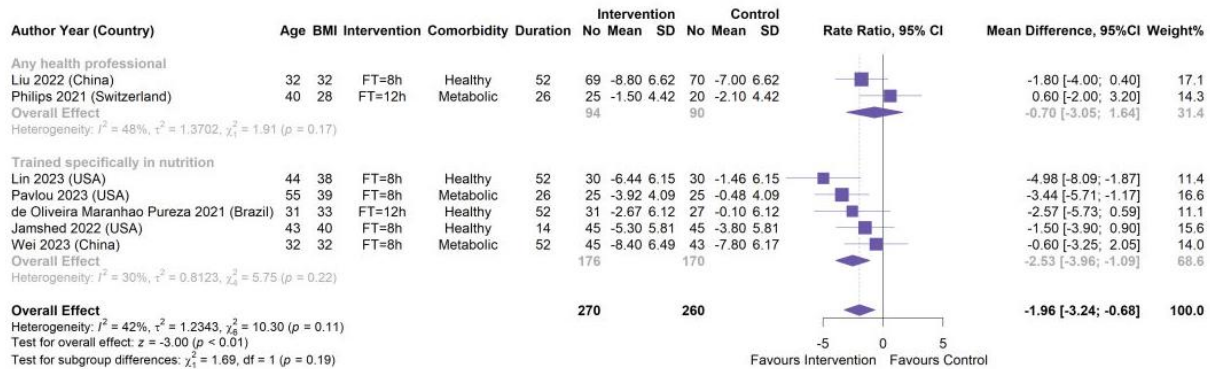

### eFigure 26: Meta-analysis of difference in mean difference (95% CIs) for the effect of time-restricted eating on waist circumference (cm), grouped by delivery personnel.

BMI: Body Mass Index; SD: Standard Deviation; CI: Confidence Interval; USA: United States of America; FT: Feeding Time; Duration: follow-up duration in weeks; 2M/3M/6M: 2, 3 or 6 meals; 3M+2S: 3 meals and 2 snacks; 3M+3S: 3 meals and 3 snacks; 10S: Grazing diet – 100kcal every 2-3 hours; HCB: High Calorie Breakfast; HCD: High Calorie Dinner; ED: Early Dinner; LD: Late Dinner; FL: Front Loading; EED: Equal Energy Distribution; ML: Middle Loading; BL: Back Loading.

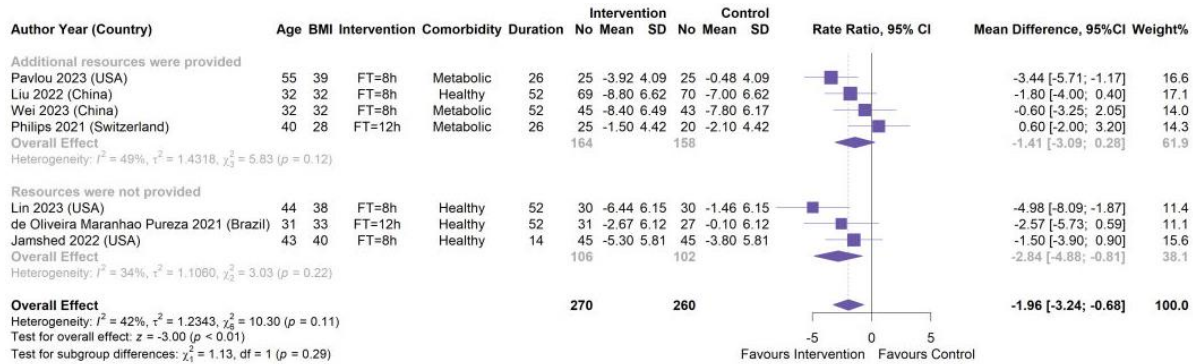

### eFigure 27: Meta-analysis of difference in mean difference (95% CIs) for the effect of time-restricted eating on waist circumference (cm), grouped by resource provision.

BMI: Body Mass Index; SD: Standard Deviation; CI: Confidence Interval; USA: United States of America; FT: Feeding Time; Duration: follow-up duration in weeks; 2M/3M/6M: 2, 3 or 6 meals; 3M+2S: 3 meals and 2 snacks; 3M+3S: 3 meals and 3 snacks; 10S: Grazing diet – 100kcal every 2-3 hours; HCB: High Calorie Breakfast; HCD: High Calorie Dinner; ED: Early Dinner; LD: Late Dinner; FL: Front Loading; EED: Equal Energy Distribution; ML: Middle Loading; BL: Back Loading.

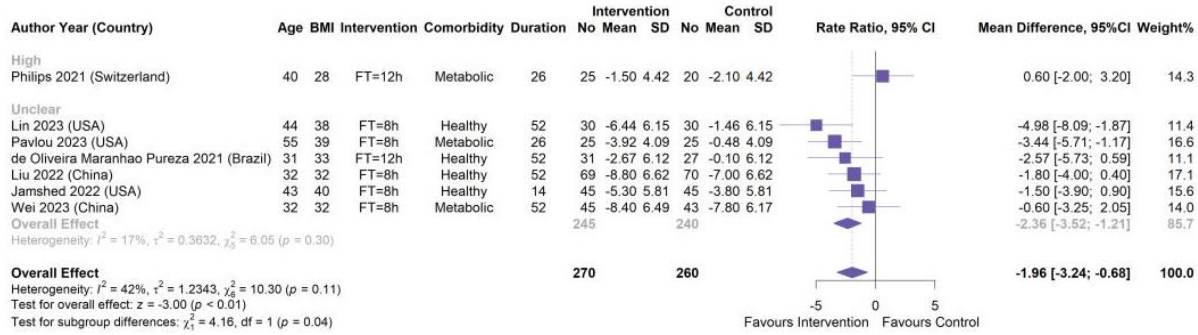

**eFigure 28: Meta-analysis of difference in mean difference (95% CIs) for the effect of time-restricted eating on waist circumference (cm), grouped by risk of bias.**

BMI: Body Mass Index; SD: Standard Deviation; CI: Confidence Interval; USA: United States of America; FT: Feeding Time; Duration: follow-up duration in weeks; 2M/3M/6M: 2, 3 or 6 meals; 3M+2S: 3 meals and 2 snacks; 3M+3S: 3 meals and 3 snacks; 10S: Grazing diet – 100kcal every 2-3 hours; HCB: High Calorie Breakfast; HCD: High Calorie Dinner; ED: Early Dinner; LD: Late Dinner; FL: Front Loading; EED: Equal Energy Distribution; ML: Middle Loading; BL: Back Loading.

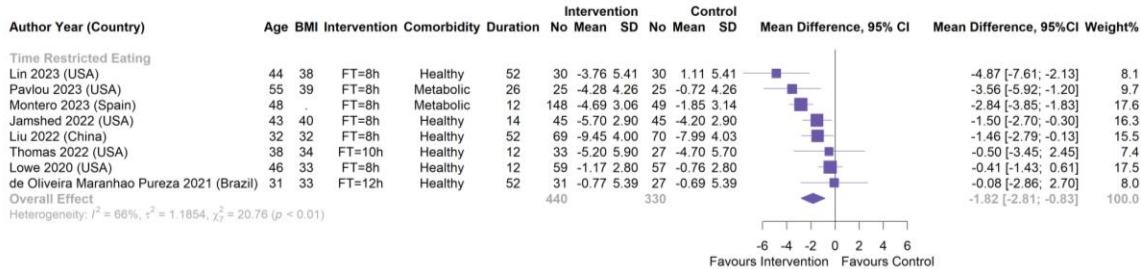

**eFigure 29: Meta-analysis of difference in mean difference (95% CIs) for the effect of meal timing interventions on percentage of weight loss (%), grouped by the meal timing intervention.**

BMI: Body Mass Index; SD: Standard Deviation; CI: Confidence Interval; USA: United States of America; FT: Feeding Time; Duration: follow-up duration in weeks; 2M/3M/6M: 2, 3 or 6 meals; 3M+2S: 3 meals and 2 snacks; 3M+3S: 3 meals and 3 snacks; 10S: Grazing diet – 100kcal every 2-3 hours; HCB: High Calorie Breakfast; HCD: High Calorie Dinner; ED: Early Dinner; LD: Late Dinner; FL: Front Loading; EED: Equal Energy Distribution; ML: Middle Loading; BL: Back Loading.

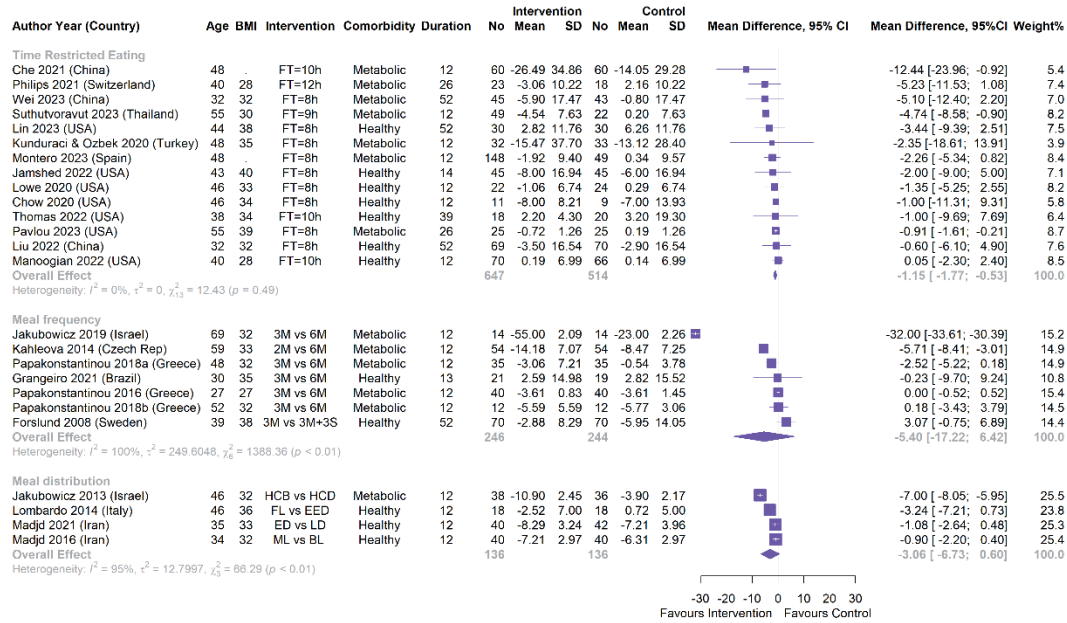

**eFigure 30: Meta-analysis of difference in mean difference (95% CIs) for the effect of meal timing interventions on fasting plasma glucose (mg/dL), grouped by the meal timing intervention.**

BMI: Body Mass Index; SD: Standard Deviation; CI: Confidence Interval; USA: United States of America; FT: Feeding Time; Duration: follow-up duration in weeks; 2M/3M/6M: 2, 3 or 6 meals; 3M+2S: 3 meals and 2 snacks; 3M+3S: 3 meals and 3 snacks; 10S: Grazing diet – 100kcal every 2-3 hours; HCB: High Calorie Breakfast; HCD: High Calorie Dinner; ED: Early Dinner; LD: Late Dinner; FL: Front Loading; EED: Equal Energy Distribution; ML: Middle Loading; BL: Back Loading.

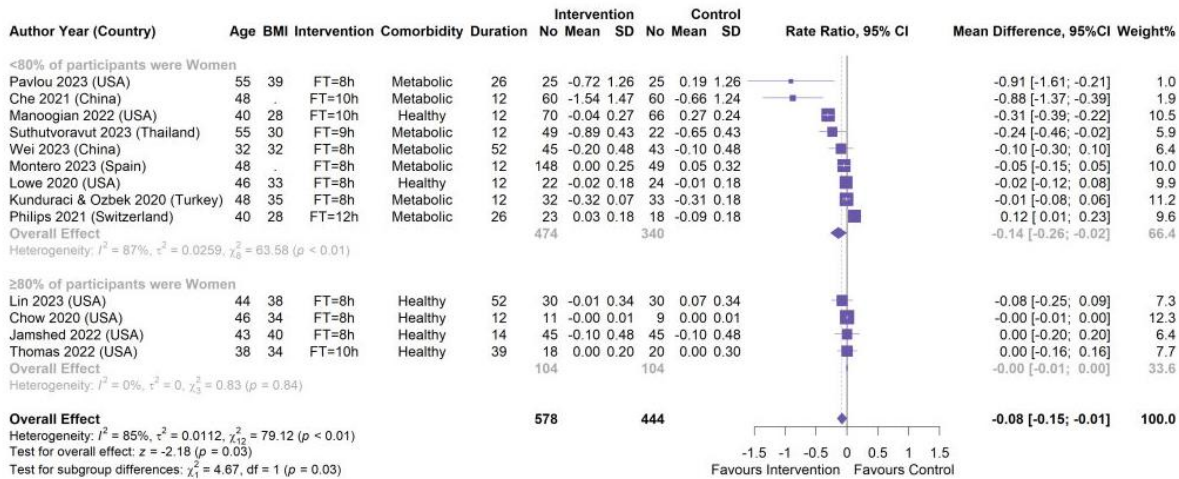

**eFigure 31: Meta-analysis of difference in mean difference (95% CIs) for the effect of time-restricted eating on HbA1c (%), grouped by gender proportion.**

BMI: Body Mass Index; SD: Standard Deviation; CI: Confidence Interval; USA: United States of America; FT: Feeding Time; Duration: follow-up duration in weeks; 2M/3M/6M: 2, 3 or 6 meals; 3M+2S: 3 meals and 2 snacks; 3M+3S: 3 meals and 3 snacks; 10S: Grazing diet – 100kcal every 2-3 hours; HCB: High Calorie Breakfast; HCD: High Calorie Dinner; ED: Early Dinner; LD: Late Dinner; FL: Front Loading; EED: Equal Energy Distribution; ML: Middle Loading; BL: Back Loading.

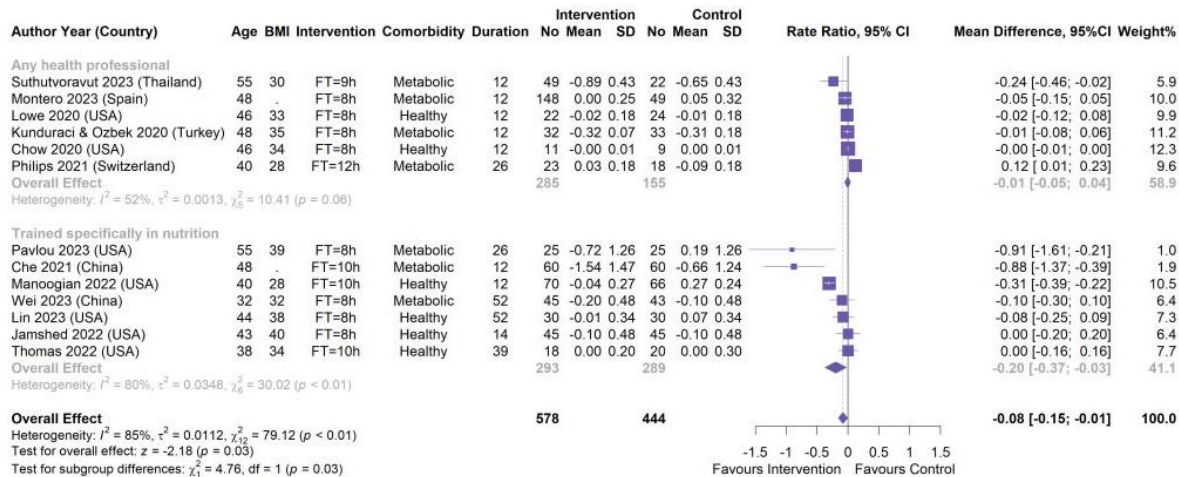

**eFigure 32: Meta-analysis of difference in mean difference (95% CIs) for the effect of time-restricted eating on HbA1c (%), grouped by delivery personnel.**

BMI: Body Mass Index; SD: Standard Deviation; CI: Confidence Interval; USA: United States of America; FT: Feeding Time; Duration: follow-up duration in weeks; 2M/3M/6M: 2, 3 or 6 meals; 3M+2S: 3 meals and 2 snacks; 3M+3S: 3 meals and 3 snacks; 10S: Grazing diet – 100kcal every 2-3 hours; HCB: High Calorie Breakfast; HCD: High Calorie Dinner; ED: Early Dinner; LD: Late Dinner; FL: Front Loading; EED: Equal Energy Distribution; ML: Middle Loading; BL: Back Loading.

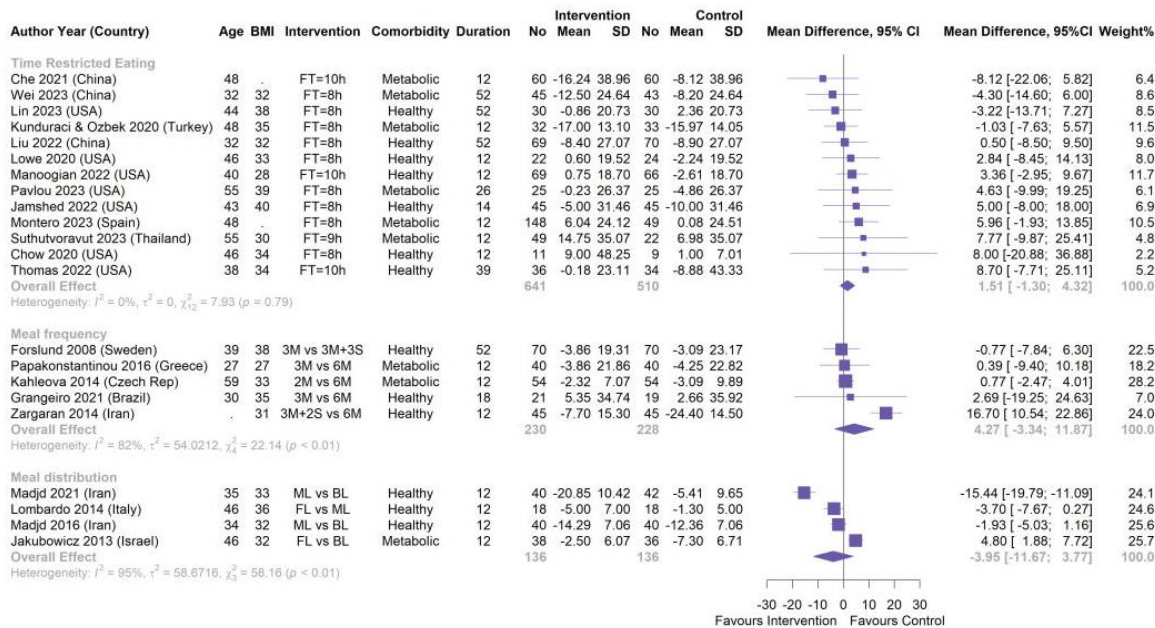

**eFigure 33: Meta-analysis of difference in mean difference (95% CIs) for the effect of meal timing interventions on LDL (mg/dL), grouped by the meal timing intervention.**

BMI: Body Mass Index; SD: Standard Deviation; CI: Confidence Interval; USA: United States of America; FT: Feeding Time; Duration: follow-up duration in weeks; 2M/3M/6M: 2, 3 or 6 meals; 3M+2S: 3 meals and 2 snacks; 3M+3S: 3 meals and 3 snacks; 10S: Grazing diet – 100kcal every 2-3 hours; HCB: High Calorie Breakfast; HCD: High Calorie Dinner; ED: Early Dinner; LD: Late Dinner; FL: Front Loading; EED: Equal Energy Distribution; ML: Middle Loading; BL: Back Loading.

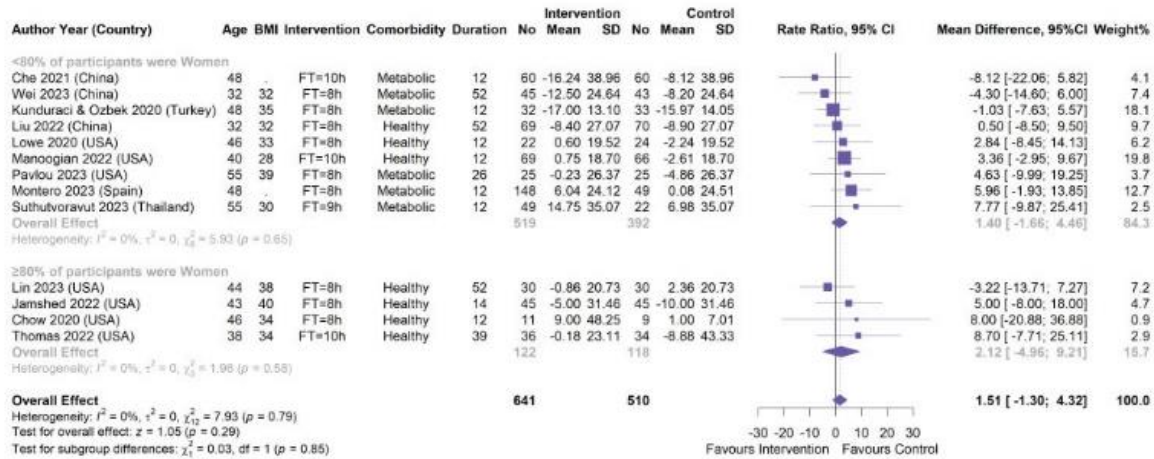

**eFigure 34: Meta-analysis of difference in mean difference (95% CIs) for the effect of time-restricted eating on LDL (mg/dL), grouped by gender proportion.**

BMI: Body Mass Index; SD: Standard Deviation; CI: Confidence Interval; USA: United States of America; FT: Feeding Time; Duration: follow-up duration in weeks; 2M/3M/6M: 2, 3 or 6 meals; 3M+2S: 3 meals and 2 snacks; 3M+3S: 3 meals and 3 snacks; 10S: Grazing diet – 100kcal every 2-3 hours; HCB: High Calorie Breakfast; HCD: High Calorie Dinner; ED: Early Dinner; LD: Late Dinner; FL: Front Loading; EED: Equal Energy Distribution; ML: Middle Loading; BL: Back Loading.

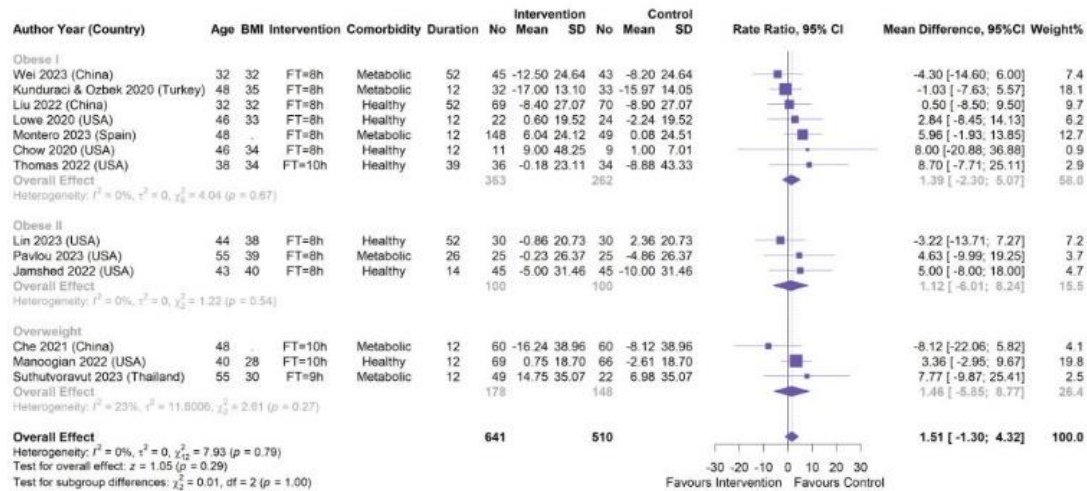

**eFigure 35: Meta-analysis of difference in mean difference (95% CIs) for the effect of time-restricted eating on LDL (mg/dL), grouped by baseline BMI status.**

BMI: Body Mass Index; SD: Standard Deviation; CI: Confidence Interval; USA: United States of America; FT: Feeding Time; Duration: follow-up duration in weeks; 2M/3M/6M: 2, 3 or 6 meals; 3M+2S: 3 meals and 2 snacks; 3M+3S: 3 meals and 3 snacks; 10S: Grazing diet – 100kcal every 2-3 hours; HCB: High Calorie Breakfast; HCD: High Calorie Dinner; ED: Early Dinner; LD: Late Dinner; FL: Front Loading; EED: Equal Energy Distribution; ML: Middle Loading; BL: Back Loading.

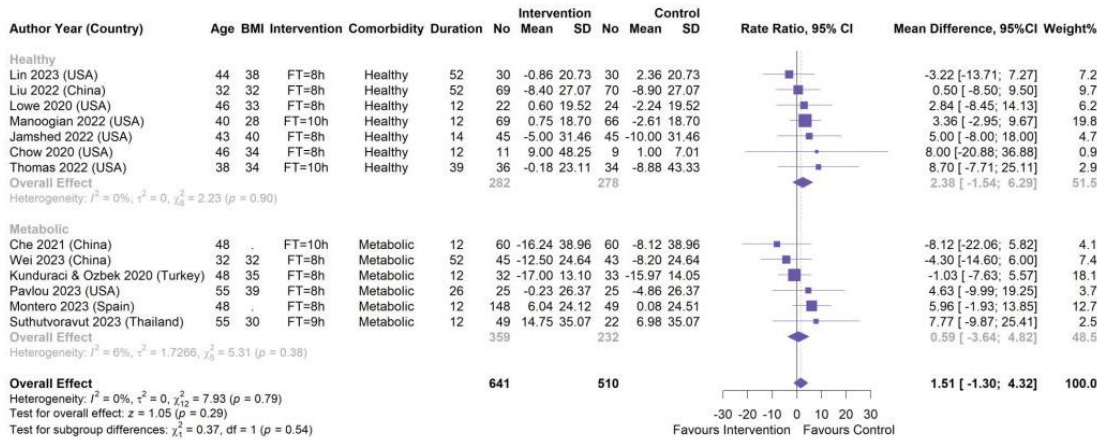

**eFigure 36: Meta-analysis of difference in mean difference (95% CIs) for the effect of time-restricted eating on LDL (mg/dL), grouped by health status.**

BMI: Body Mass Index; SD: Standard Deviation; CI: Confidence Interval; USA: United States of America; FT: Feeding Time; Duration: follow-up duration in weeks; 2M/3M/6M: 2, 3 or 6 meals; 3M+2S: 3 meals and 2 snacks; 3M+3S: 3 meals and 3 snacks; 10S: Grazing diet – 100kcal every 2-3 hours; HCB: High Calorie Breakfast; HCD: High Calorie Dinner; ED: Early Dinner; LD: Late Dinner; FL: Front Loading; EED: Equal Energy Distribution; ML: Middle Loading; BL: Back Loading.

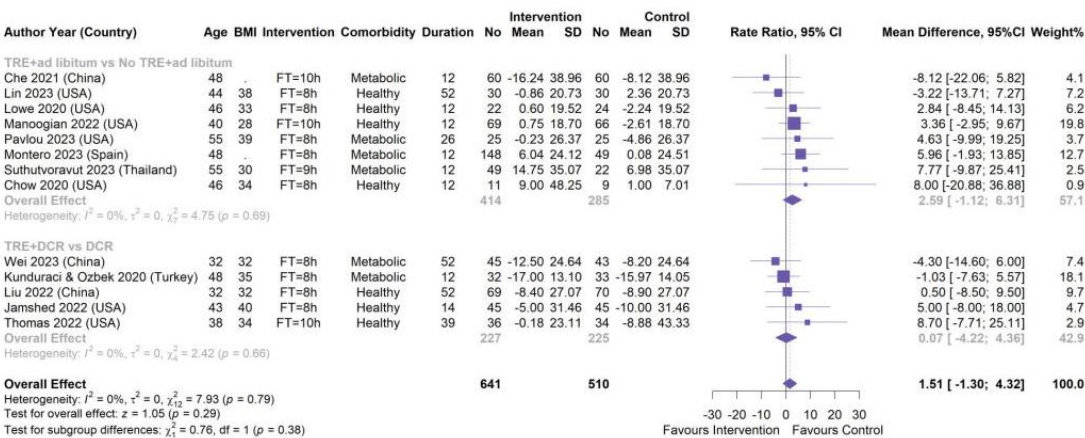

**eFigure 37: Meta-analysis of difference in mean difference (95% CIs) for the effect of time-restricted eating on LDL (mg/dL), grouped by energy prescription.**

BMI: Body Mass Index; SD: Standard Deviation; CI: Confidence Interval; USA: United States of America; FT: Feeding Time; Duration: follow-up duration in weeks; 2M/3M/6M: 2, 3 or 6 meals; 3M+2S: 3 meals and 2 snacks; 3M+3S: 3 meals and 3 snacks; 10S: Grazing diet – 100kcal every 2-3 hours; HCB: High Calorie Breakfast; HCD: High Calorie Dinner; ED: Early Dinner; LD: Late Dinner; FL: Front Loading; EED: Equal Energy Distribution; ML: Middle Loading; BL: Back Loading.

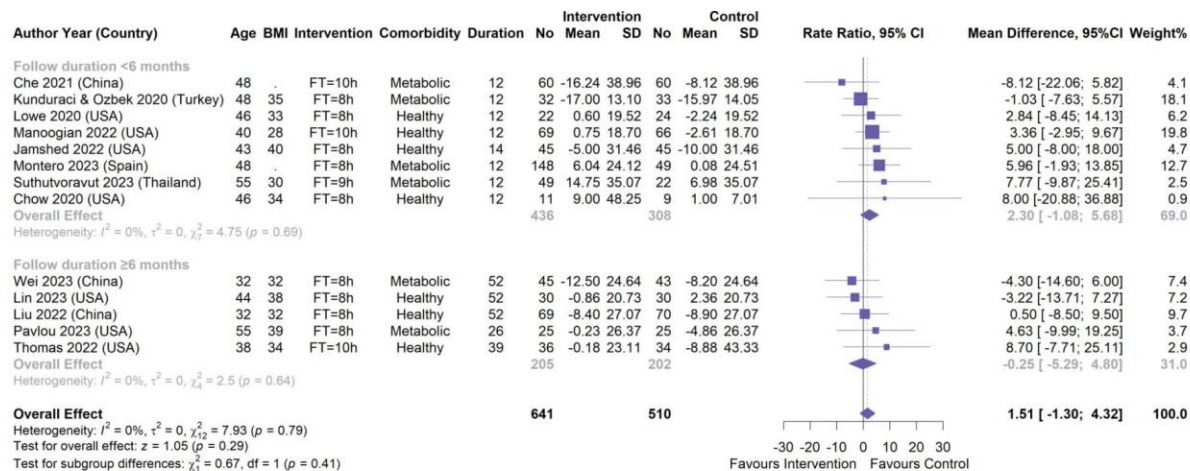

**eFigure 38: Meta-analysis of difference in mean difference (95% CIs) for the effect of time-restricted eating on LDL (mg/dL), grouped by follow duration.**

BMI: Body Mass Index; SD: Standard Deviation; CI: Confidence Interval; USA: United States of America; FT: Feeding Time; Duration: follow-up duration in weeks; 2M/3M/6M: 2, 3 or 6 meals; 3M+2S: 3 meals and 2 snacks; 3M+3S: 3 meals and 3 snacks; 10S: Grazing diet – 100kcal every 2-3 hours; HCB: High Calorie Breakfast; HCD: High Calorie Dinner; ED: Early Dinner; LD: Late Dinner; FL: Front Loading; EED: Equal Energy Distribution; ML: Middle Loading; BL: Back Loading.

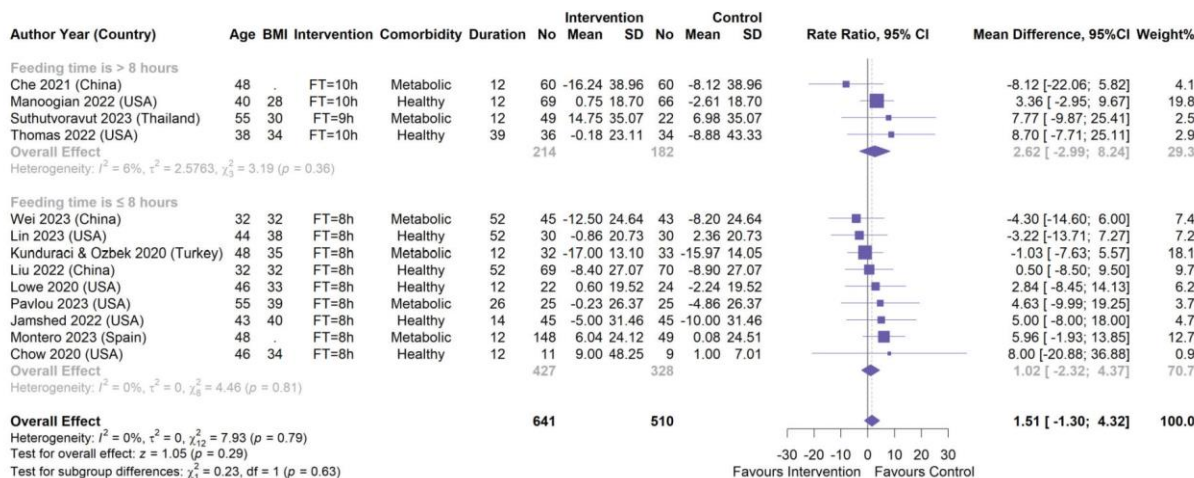

**eFigure 39: Meta-analysis of difference in mean difference (95% CIs) for the effect of time-restricted eating on LDL (mg/dL), grouped by eating window.**

BMI: Body Mass Index; SD: Standard Deviation; CI: Confidence Interval; USA: United States of America; FT: Feeding Time; Duration: follow-up duration in weeks; 2M/3M/6M: 2, 3 or 6 meals; 3M+2S: 3 meals and 2 snacks; 3M+3S: 3 meals and 3 snacks; 10S: Grazing diet – 100kcal every 2-3 hours; HCB: High Calorie Breakfast; HCD: High Calorie Dinner; ED: Early Dinner; LD: Late Dinner; FL: Front Loading; EED: Equal Energy Distribution; ML: Middle Loading; BL: Back Loading.



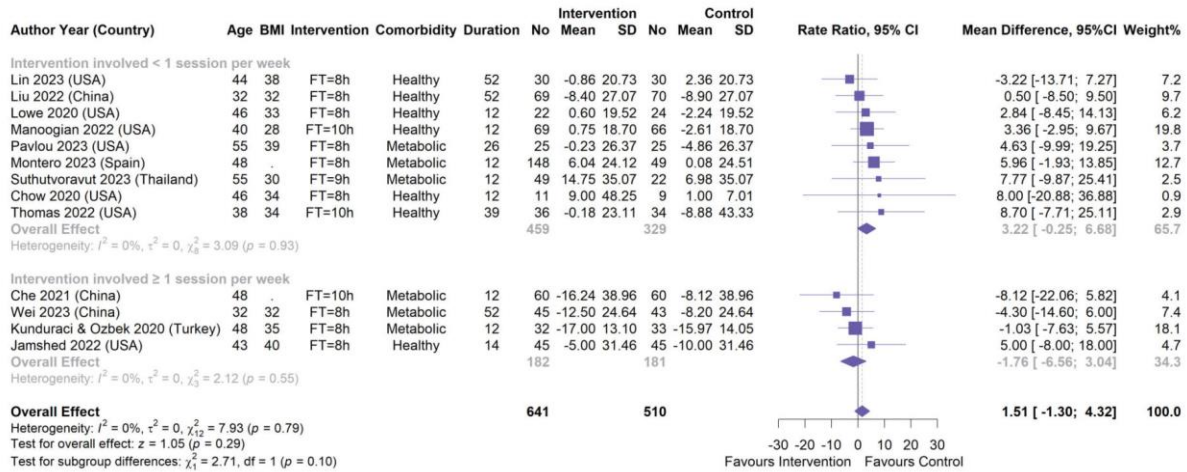

**eFigure 40: Meta-analysis of difference in mean difference (95% CIs) for the effect of time-restricted eating on LDL (mg/dL), grouped by frequency of contact.**

BMI: Body Mass Index; SD: Standard Deviation; CI: Confidence Interval; USA: United States of America; FT: Feeding Time; Duration: follow-up duration in weeks; 2M/3M/6M: 2, 3 or 6 meals; 3M+2S: 3 meals and 2 snacks; 3M+3S: 3 meals and 3 snacks; 10S: Grazing diet – 100kcal every 2-3 hours; HCB: High Calorie Breakfast; HCD: High Calorie Dinner; ED: Early Dinner; LD: Late Dinner; FL: Front Loading; EED: Equal Energy Distribution; ML: Middle Loading; BL: Back Loading.

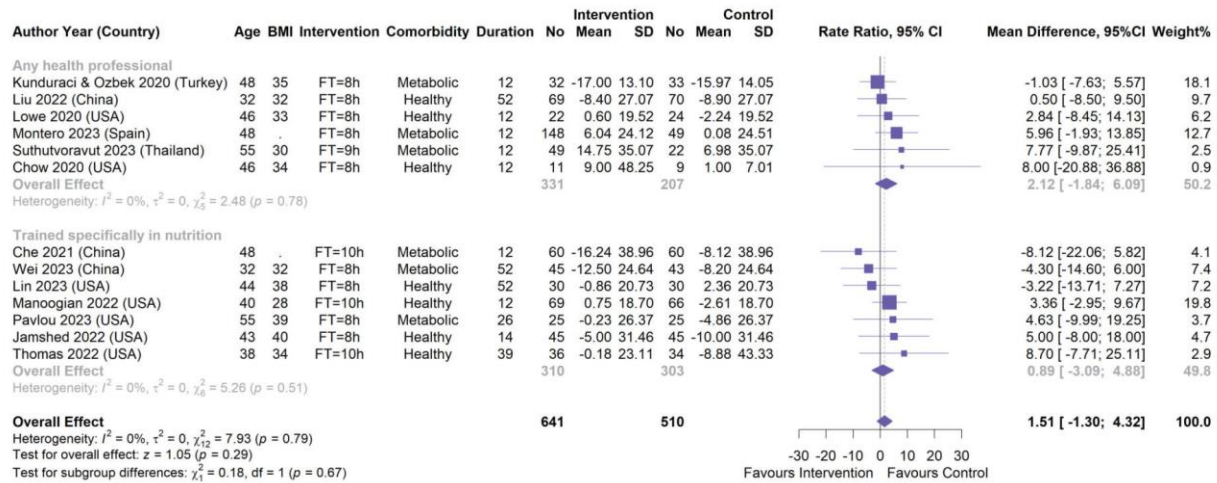

**eFigure 41: Meta-analysis of difference in mean difference (95% CIs) for the effect of time-restricted eating on LDL (mg/dL), grouped by delivery personnel.**

BMI: Body Mass Index; SD: Standard Deviation; CI: Confidence Interval; USA: United States of America; FT: Feeding Time; Duration: follow-up duration in weeks; 2M/3M/6M: 2, 3 or 6 meals; 3M+2S: 3 meals and 2 snacks; 3M+3S: 3 meals and 3 snacks; 10S: Grazing diet – 100kcal every 2-3 hours; HCB: High Calorie Breakfast; HCD: High Calorie Dinner; ED: Early Dinner; LD: Late Dinner; FL: Front Loading; EED: Equal Energy Distribution; ML: Middle Loading; BL: Back Loading.

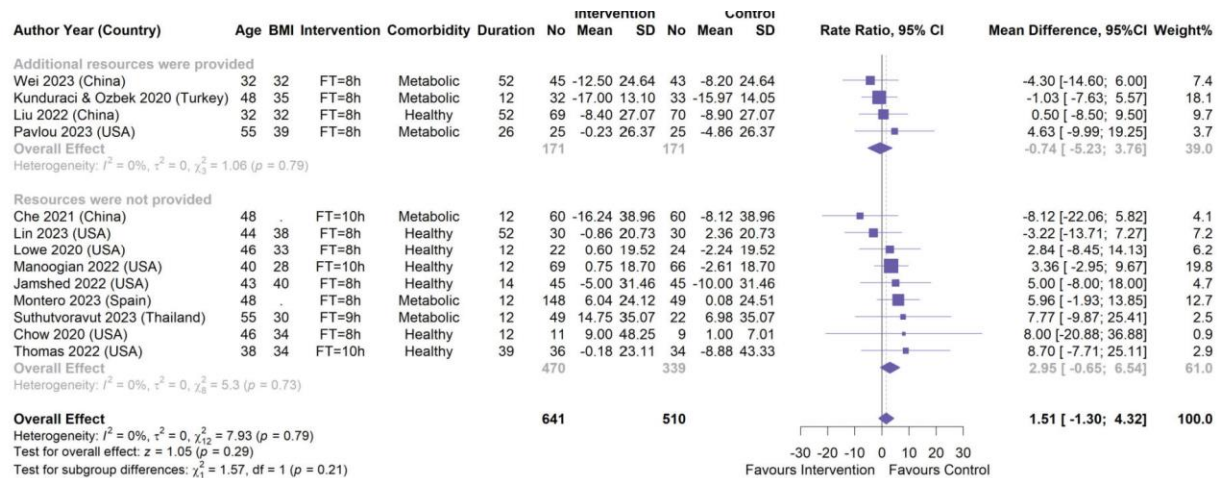

**eFigure 42: Meta-analysis of difference in mean difference (95% CIs) for the effect of time-restricted eating on LDL (mg/dL), grouped by resource provision.**

BMI: Body Mass Index; SD: Standard Deviation; CI: Confidence Interval; USA: United States of America; FT: Feeding Time; Duration: follow-up duration in weeks; 2M/3M/6M: 2, 3 or 6 meals; 3M+2S: 3 meals and 2 snacks; 3M+3S: 3 meals and 3 snacks; 10S: Grazing diet – 100kcal every 2-3 hours; HCB: High Calorie Breakfast; HCD: High Calorie Dinner; ED: Early Dinner; LD: Late Dinner; FL: Front Loading; EED: Equal Energy Distribution; ML: Middle Loading; BL: Back Loading.

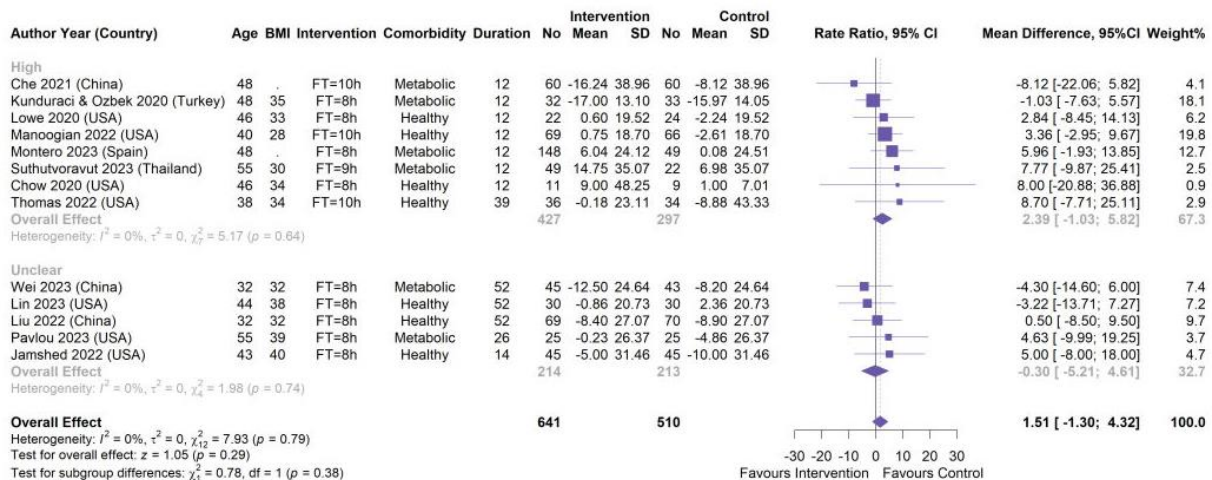

**eFigure 43: Meta-analysis of difference in mean difference (95% CIs) for the effect of time-restricted eating on LDL (mg/dL), grouped by risk of bias.**

BMI: Body Mass Index; SD: Standard Deviation; CI: Confidence Interval; USA: United States of America; FT: Feeding Time; Duration: follow-up duration in weeks; 2M/3M/6M: 2, 3 or 6 meals; 3M+2S: 3 meals and 2 snacks; 3M+3S: 3 meals and 3 snacks; 10S: Grazing diet – 100kcal every 2-3 hours; HCB: High Calorie Breakfast; HCD: High Calorie Dinner; ED: Early Dinner; LD: Late Dinner; FL: Front Loading; EED: Equal Energy Distribution; ML: Middle Loading; BL: Back Loading.

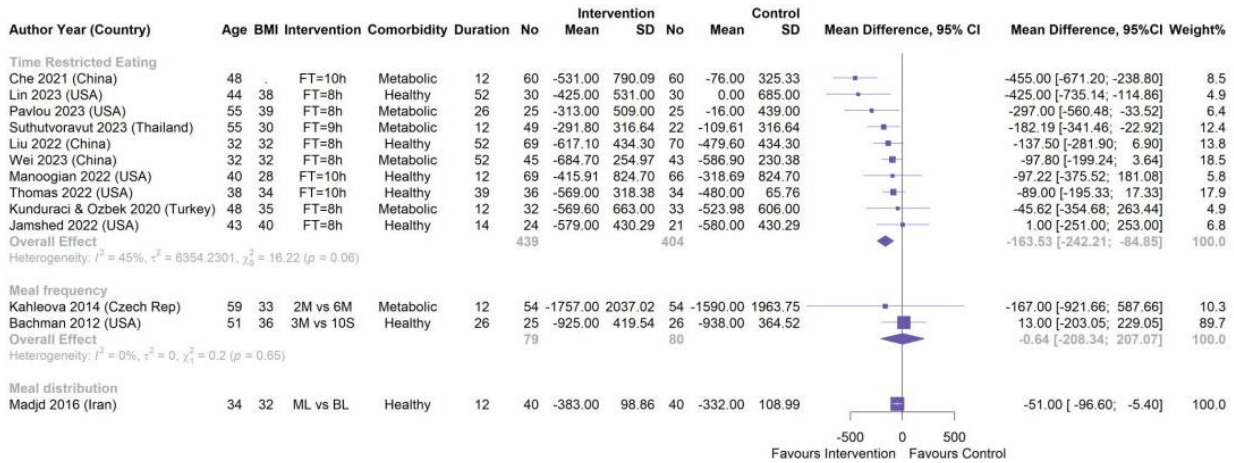

**eFigure 44: Meta-analysis of difference in mean difference (95% CIs) for the effect of meal timing interventions on energy intake (kcal/day), grouped by the meal timing intervention.**

BMI: Body Mass Index; SD: Standard Deviation; CI: Confidence Interval; USA: United States of America; FT: Feeding Time; Duration: follow-up duration in weeks; 2M/3M/6M: 2, 3 or 6 meals; 3M+2S: 3 meals and 2 snacks; 3M+3S: 3 meals and 3 snacks; 10S: Grazing diet – 100kcal every 2-3 hours; HCB: High Calorie Breakfast; HCD: High Calorie Dinner; ED: Early Dinner; LD: Late Dinner; FL: Front Loading; EED: Equal Energy Distribution; ML: Middle Loading; BL: Back Loading.

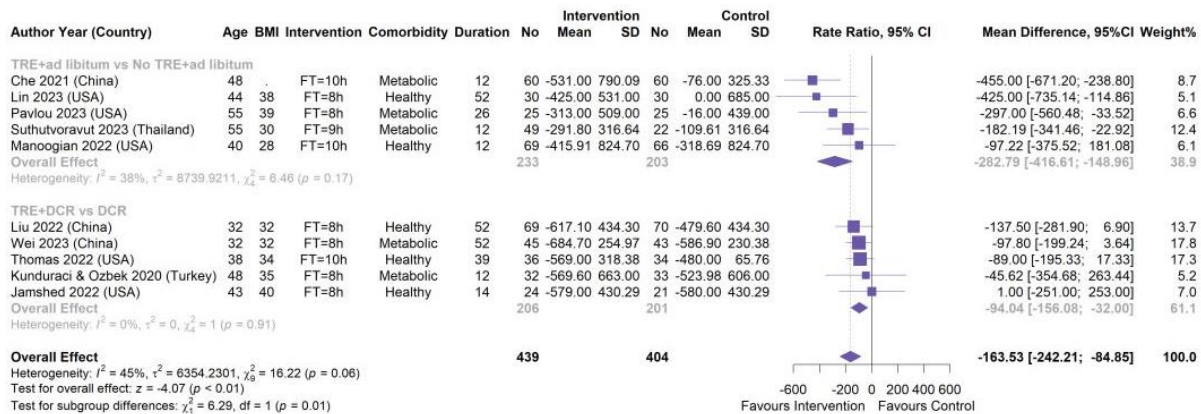

**eFigure 45: Meta-analysis of difference in mean difference (95% CIs) for the effect of time-restricted eating on energy intake (kcal/day), grouped by energy prescription.**

BMI: Body Mass Index; SD: Standard Deviation; CI: Confidence Interval; USA: United States of America; FT: Feeding Time; Duration: follow-up duration in weeks; 2M/3M/6M: 2, 3 or 6 meals; 3M+2S: 3 meals and 2 snacks; 3M+3S: 3 meals and 3 snacks; 10S: Grazing diet – 100kcal every 2-3 hours; HCB: High Calorie Breakfast; HCD: High Calorie Dinner; ED: Early Dinner; LD: Late Dinner; FL: Front Loading; EED: Equal Energy Distribution; ML: Middle Loading; BL: Back Loading.

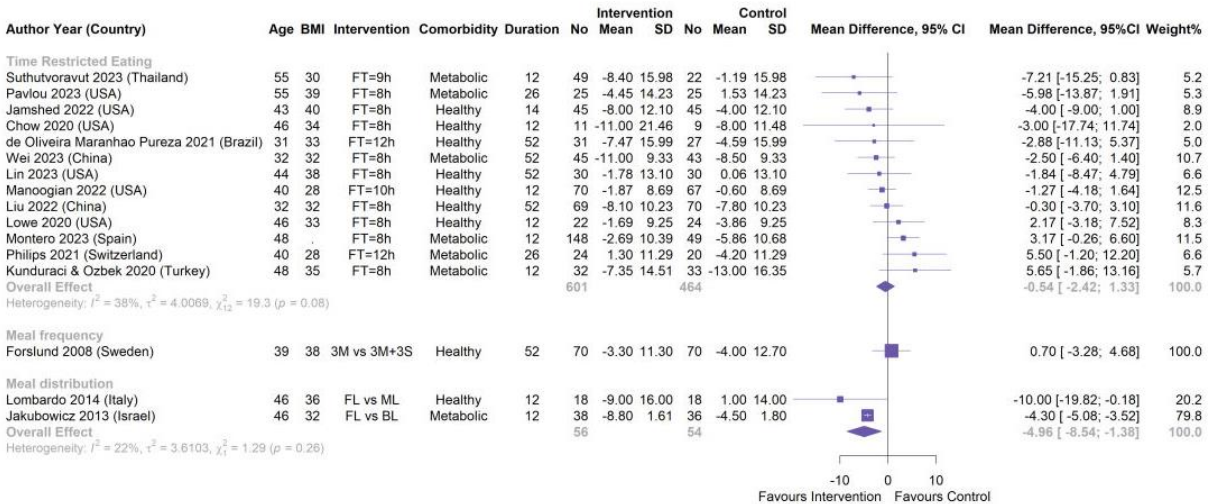

**eFigure 46: Meta-analysis of difference in mean difference (95% CIs) for the effect of meal timing interventions on systolic blood pressure (mmHg), grouped by the meal timing intervention.**

BMI: Body Mass Index; SD: Standard Deviation; CI: Confidence Interval; USA: United States of America; FT: Feeding Time; Duration: follow-up duration in weeks; 2M/3M/6M: 2, 3 or 6 meals; 3M+2S: 3 meals and 2 snacks; 3M+3S: 3 meals and 3 snacks; 10S: Grazing diet – 100kcal every 2-3 hours; HCB: High Calorie Breakfast; HCD: High Calorie Dinner; ED: Early Dinner; LD: Late Dinner; FL: Front Loading; EED: Equal Energy Distribution; ML: Middle Loading; BL: Back Loading.

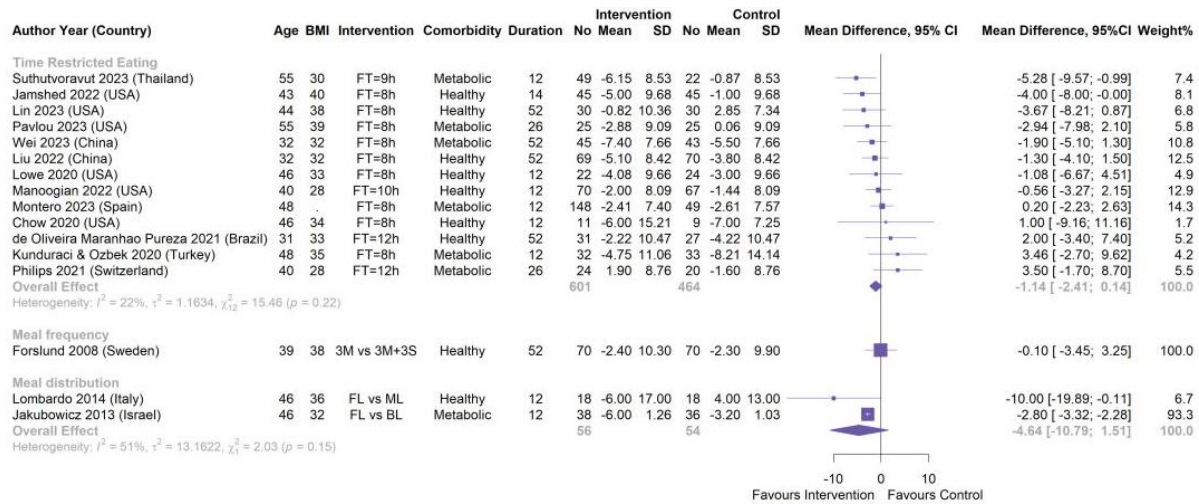

**eFigure 47: Meta-analysis of difference in mean difference (95% CIs) for the effect of meal timing interventions on diastolic blood pressure (mmHg), grouped by the meal timing intervention.**

BMI: Body Mass Index; SD: Standard Deviation; CI: Confidence Interval; USA: United States of America; FT: Feeding Time; Duration: follow-up duration in weeks; 2M/3M/6M: 2, 3 or 6 meals; 3M+2S: 3 meals and 2 snacks; 3M+3S: 3 meals and 3 snacks; 10S: Grazing diet – 100kcal every 2-3 hours; HCB: High Calorie Breakfast; HCD: High Calorie Dinner; ED: Early Dinner; LD: Late Dinner; FL: Front Loading; EED: Equal Energy Distribution; ML: Middle Loading; BL: Back Loading.

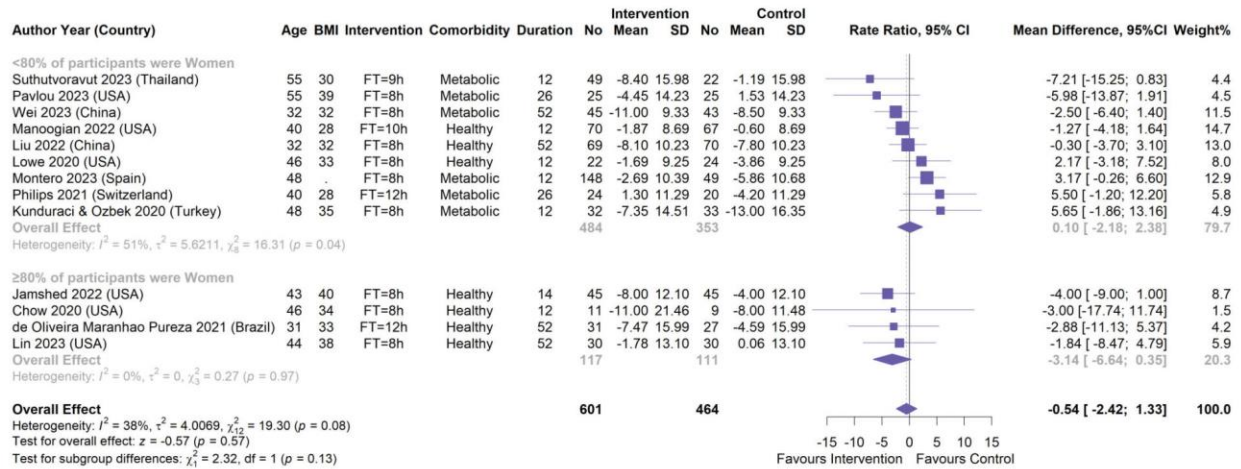

**eFigure 48: Meta-analysis of difference in mean difference (95% CIs) for the effect of time-restricted eating on systolic blood pressure (mmHg), grouped by gender proportion.**

BMI: Body Mass Index; SD: Standard Deviation; CI: Confidence Interval; USA: United States of America; FT: Feeding Time; Duration: follow-up duration in weeks; 2M/3M/6M: 2, 3 or 6 meals; 3M+2S: 3 meals and 2 snacks; 3M+3S: 3 meals and 3 snacks; 10S: Grazing diet – 100kcal every 2-3 hours; HCB: High Calorie Breakfast; HCD: High Calorie Dinner; ED: Early Dinner; LD: Late Dinner; FL: Front Loading; EED: Equal Energy Distribution; ML: Middle Loading; BL: Back Loading.

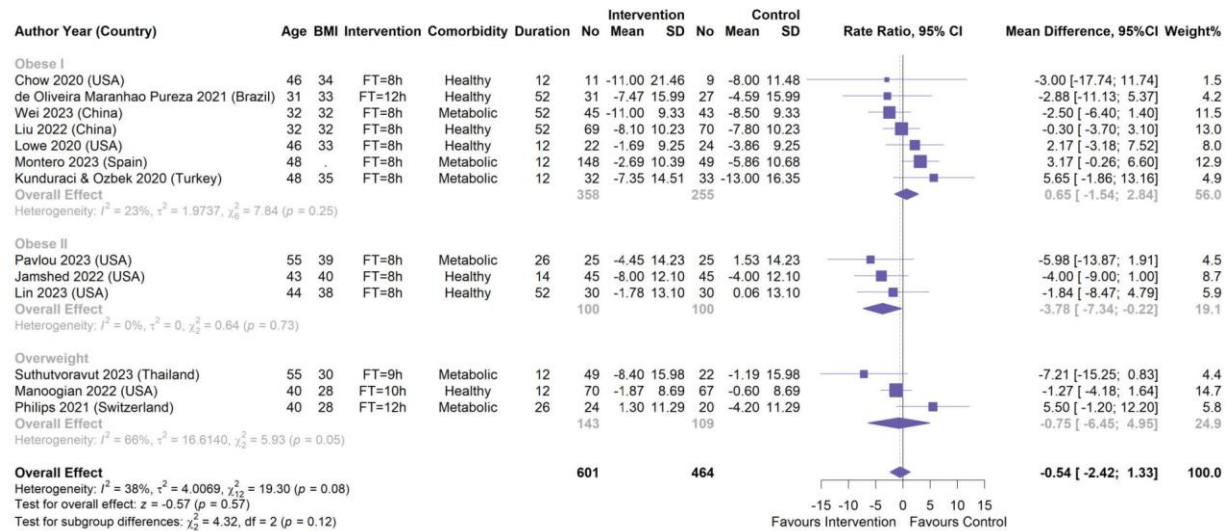

**eFigure 49: Meta-analysis of difference in mean difference (95% CIs) for the effect of time-restricted eating on systolic blood pressure (mmHg), grouped by baseline BMI status.**

BMI: Body Mass Index; SD: Standard Deviation; CI: Confidence Interval; USA: United States of America; FT: Feeding Time; Duration: follow-up duration in weeks; 2M/3M/6M: 2, 3 or 6 meals; 3M+2S: 3 meals and 2 snacks; 3M+3S: 3 meals and 3 snacks; 10S: Grazing diet – 100kcal every 2-3 hours; HCB: High Calorie Breakfast; HCD: High Calorie Dinner; ED: Early Dinner; LD: Late Dinner; FL: Front Loading; EED: Equal Energy Distribution; ML: Middle Loading; BL: Back Loading.

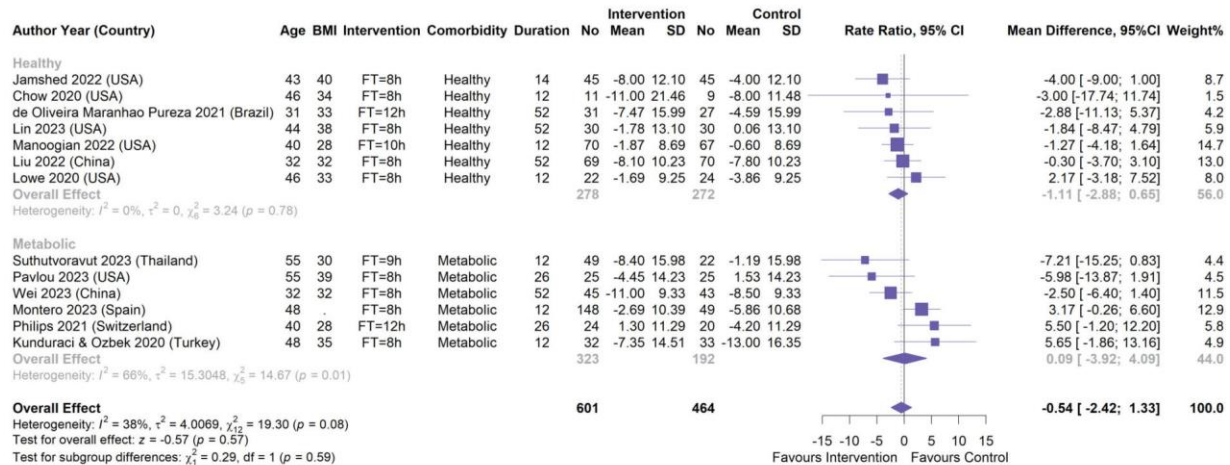

**eFigure 50: Meta-analysis of difference in mean difference (95% CIs) for the effect of time-restricted eating on systolic blood pressure (mmHg), grouped by health status.**

BMI: Body Mass Index; SD: Standard Deviation; CI: Confidence Interval; USA: United States of America; FT: Feeding Time; Duration: follow-up duration in weeks; 2M/3M/6M: 2, 3 or 6 meals; 3M+2S: 3 meals and 2 snacks; 3M+3S: 3 meals and 3 snacks; 10S: Grazing diet – 100kcal every 2-3 hours; HCB: High Calorie Breakfast; HCD: High Calorie Dinner; ED: Early Dinner; LD: Late Dinner; FL: Front Loading; EED: Equal Energy Distribution; ML: Middle Loading; BL: Back Loading.

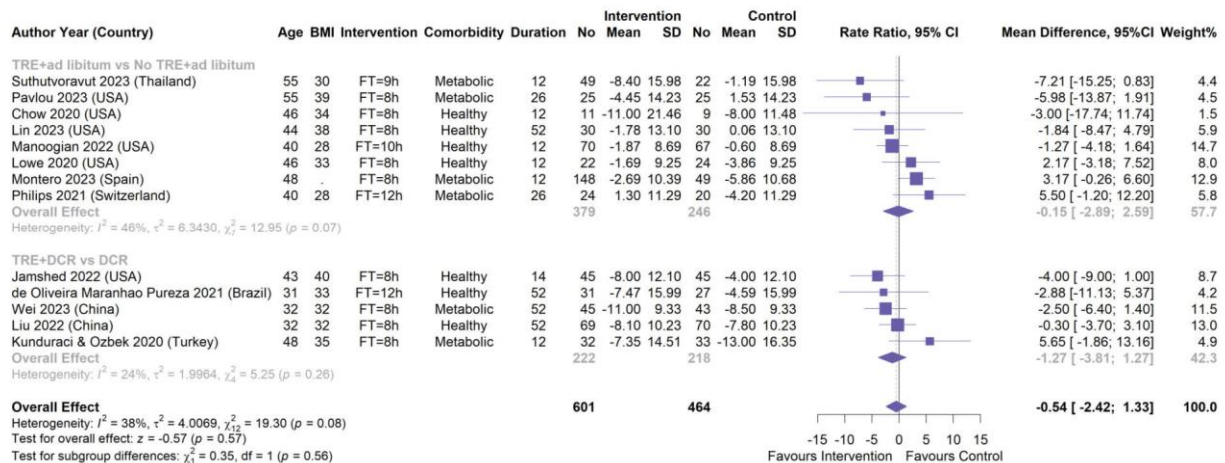

**eFigure 51: Meta-analysis of difference in mean difference (95% CIs) for the effect of time-restricted eating on systolic blood pressure (mmHg), grouped by energy prescription.**

BMI: Body Mass Index; SD: Standard Deviation; CI: Confidence Interval; USA: United States of America; FT: Feeding Time; Duration: follow-up duration in weeks; 2M/3M/6M: 2, 3 or 6 meals; 3M+2S: 3 meals and 2 snacks; 3M+3S: 3 meals and 3 snacks; 10S: Grazing diet – 100kcal every 2-3 hours; HCB: High Calorie Breakfast; HCD: High Calorie Dinner; ED: Early Dinner; LD: Late Dinner; FL: Front Loading; EED: Equal Energy Distribution; ML: Middle Loading; BL: Back Loading.

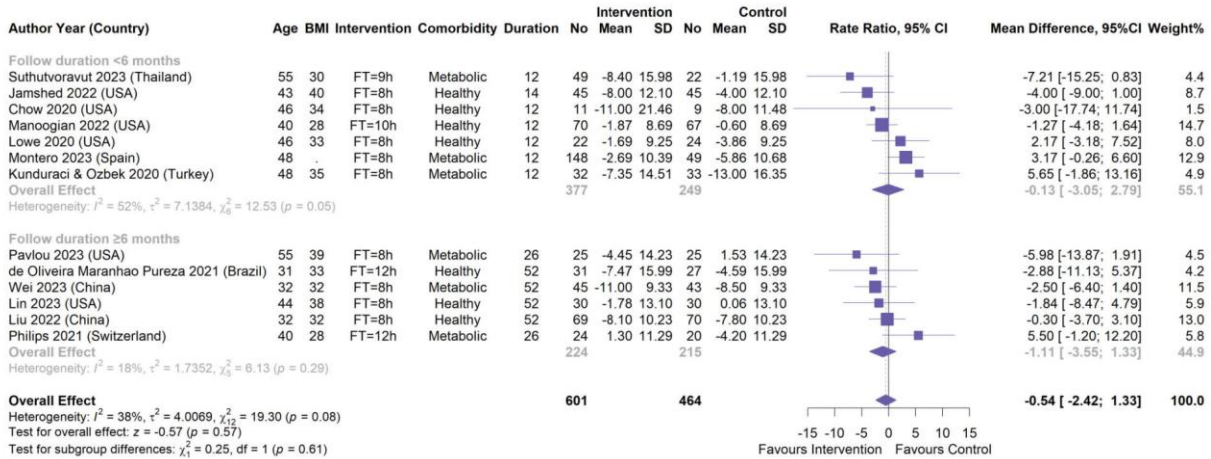

**eFigure 52: Meta-analysis of difference in mean difference (95% CIs) for the effect of time-restricted eating on systolic blood pressure (mmHg), grouped by follow duration.**

BMI: Body Mass Index; SD: Standard Deviation; CI: Confidence Interval; USA: United States of America; FT: Feeding Time; Duration: follow-up duration in weeks; 2M/3M/6M: 2, 3 or 6 meals; 3M+2S: 3 meals and 2 snacks; 3M+3S: 3 meals and 3 snacks; 10S: Grazing diet – 100kcal every 2-3 hours; HCB: High Calorie Breakfast; HCD: High Calorie Dinner; ED: Early Dinner; LD: Late Dinner; FL: Front Loading; EED: Equal Energy Distribution; ML: Middle Loading; BL: Back Loading.

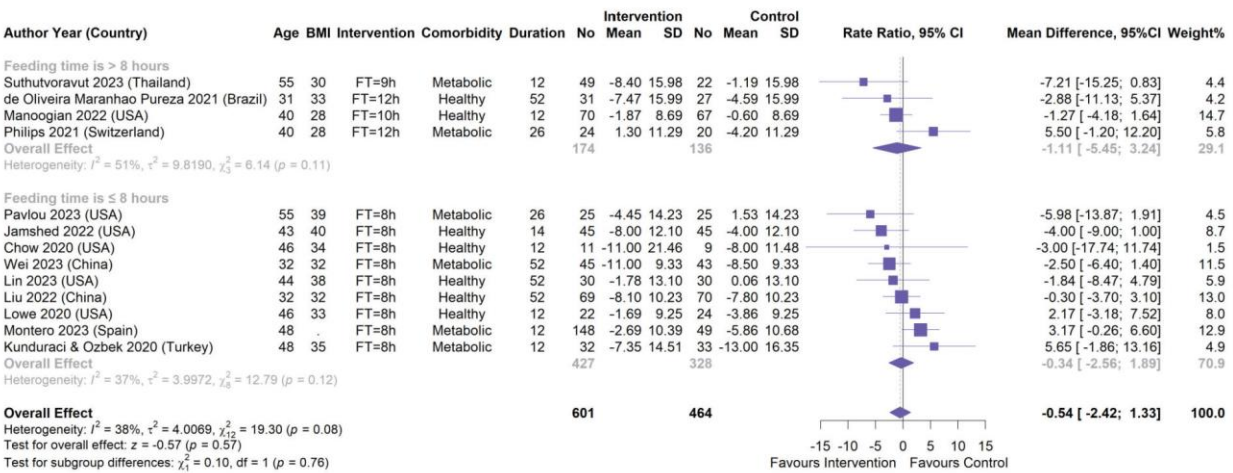

**eFigure 53: Meta-analysis of difference in mean difference (95% CIs) for the effect of time-restricted eating on systolic blood pressure (mmHg), grouped by eating window.**

BMI: Body Mass Index; SD: Standard Deviation; CI: Confidence Interval; USA: United States of America; FT: Feeding Time; Duration: follow-up duration in weeks; 2M/3M/6M: 2, 3 or 6 meals; 3M+2S: 3 meals and 2 snacks; 3M+3S: 3 meals and 3 snacks; 10S: Grazing diet – 100kcal every 2-3 hours; HCB: High Calorie Breakfast; HCD: High Calorie Dinner; ED: Early Dinner; LD: Late Dinner; FL: Front Loading; EED: Equal Energy Distribution; ML: Middle Loading; BL: Back Loading.

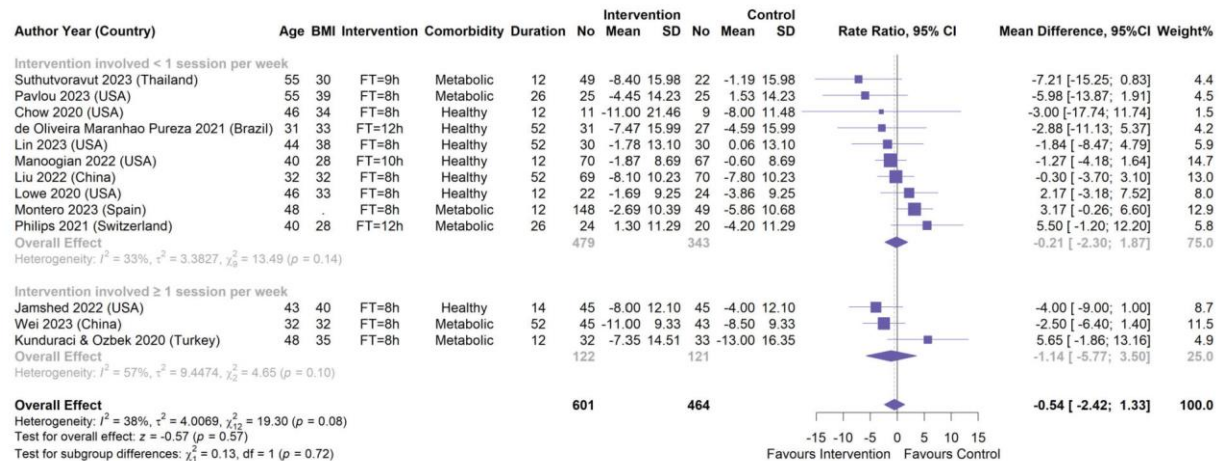

**eFigure 54: Meta-analysis of difference in mean difference (95% CIs) for the effect of time-restricted eating on systolic blood pressure (mmHg), grouped by frequency of contact.**

BMI: Body Mass Index; SD: Standard Deviation; CI: Confidence Interval; USA: United States of America; FT: Feeding Time; Duration: follow-up duration in weeks; 2M/3M/6M: 2, 3 or 6 meals; 3M+2S: 3 meals and 2 snacks; 3M+3S: 3 meals and 3 snacks; 10S: Grazing diet – 100kcal every 2-3 hours; HCB: High Calorie Breakfast; HCD: High Calorie Dinner; ED: Early Dinner; LD: Late Dinner; FL: Front Loading; EED: Equal Energy Distribution; ML: Middle Loading; BL: Back Loading.

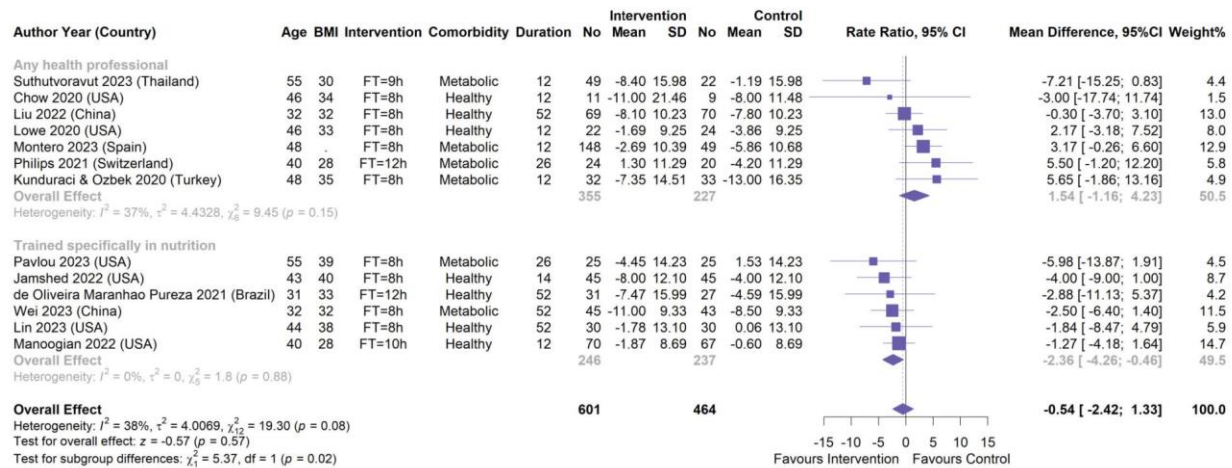

**eFigure 55: Meta-analysis of difference in mean difference (95% CIs) for the effect of time-restricted eating on systolic blood pressure (mmHg), grouped by delivery personnel.**

BMI: Body Mass Index; SD: Standard Deviation; CI: Confidence Interval; USA: United States of America; FT: Feeding Time; Duration: follow-up duration in weeks; 2M/3M/6M: 2, 3 or 6 meals; 3M+2S: 3 meals and 2 snacks; 3M+3S: 3 meals and 3 snacks; 10S: Grazing diet – 100kcal every 2-3 hours; HCB: High Calorie Breakfast; HCD: High Calorie Dinner; ED: Early Dinner; LD: Late Dinner; FL: Front Loading; EED: Equal Energy Distribution; ML: Middle Loading; BL: Back Loading.



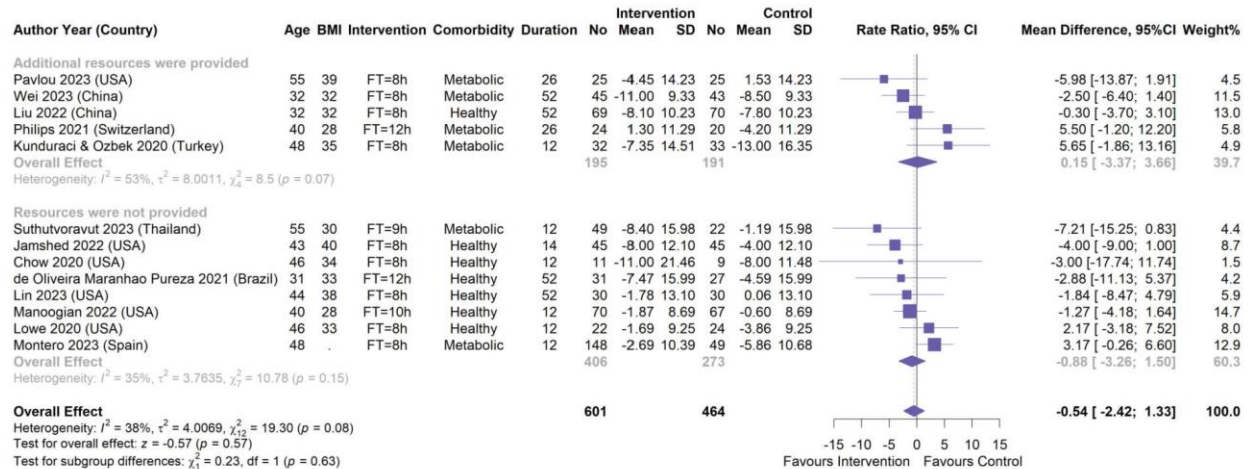

**eFigure 56: Meta-analysis of difference in mean difference (95% CIs) for the effect of time-restricted eating on systolic blood pressure (mmHg), grouped by resource provision.**

BMI: Body Mass Index; SD: Standard Deviation; CI: Confidence Interval; USA: United States of America; FT: Feeding Time; Duration: follow-up duration in weeks; 2M/3M/6M: 2, 3 or 6 meals; 3M+2S: 3 meals and 2 snacks; 3M+3S: 3 meals and 3 snacks; 10S: Grazing diet – 100kcal every 2-3 hours; HCB: High Calorie Breakfast; HCD: High Calorie Dinner; ED: Early Dinner; LD: Late Dinner; FL: Front Loading; EED: Equal Energy Distribution; ML: Middle Loading; BL: Back Loading.

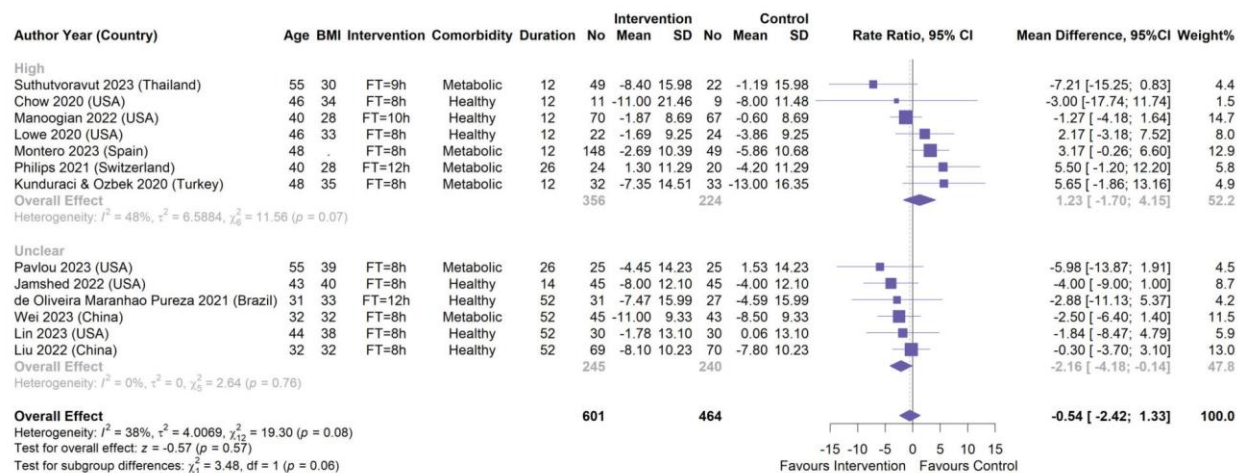

**eFigure 57: Meta-analysis of difference in mean difference (95% CIs) for the effect of time-restricted eating on systolic blood pressure (mmHg), grouped by risk of bias.**

BMI: Body Mass Index; SD: Standard Deviation; CI: Confidence Interval; USA: United States of America; FT: Feeding Time; Duration: follow-up duration in weeks; 2M/3M/6M: 2, 3 or 6 meals; 3M+2S: 3 meals and 2 snacks; 3M+3S: 3 meals and 3 snacks; 10S: Grazing diet – 100kcal every 2-3 hours; HCB: High Calorie Breakfast; HCD: High Calorie Dinner; ED: Early Dinner; LD: Late Dinner; FL: Front Loading; EED: Equal Energy Distribution; ML: Middle Loading; BL: Back Loading.

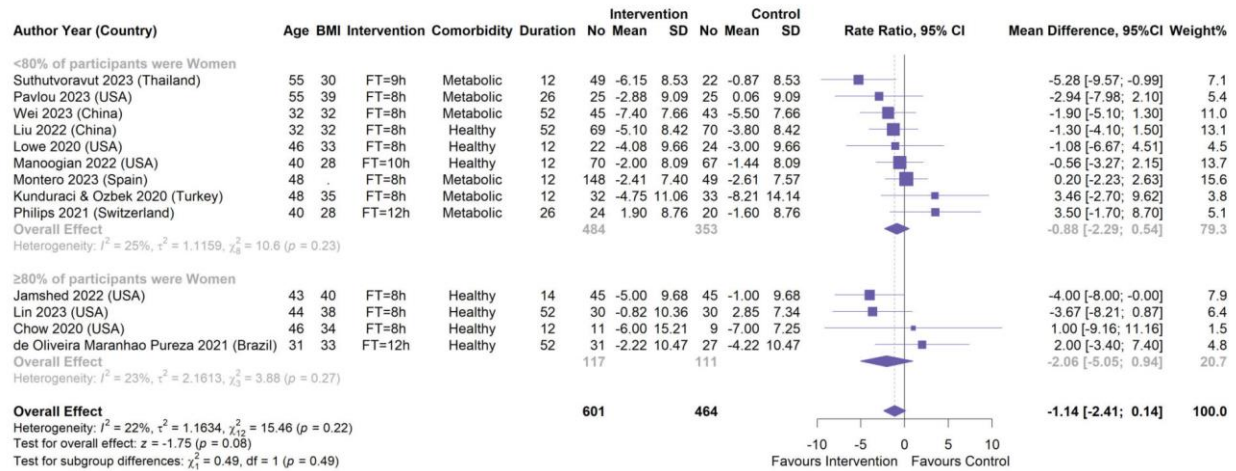

**eFigure 58: Meta-analysis of difference in mean difference (95% CIs) for the effect of time-restricted eating on diastolic blood pressure (mmHg), grouped by gender proportion.**

BMI: Body Mass Index; SD: Standard Deviation; CI: Confidence Interval; USA: United States of America; FT: Feeding Time; Duration: follow-up duration in weeks; 2M/3M/6M: 2, 3 or 6 meals; 3M+2S: 3 meals and 2 snacks; 3M+3S: 3 meals and 3 snacks; 10S: Grazing diet – 100kcal every 2-3 hours; HCB: High Calorie Breakfast; HCD: High Calorie Dinner; ED: Early Dinner; LD: Late Dinner; FL: Front Loading; EED: Equal Energy Distribution; ML: Middle Loading; BL: Back Loading.

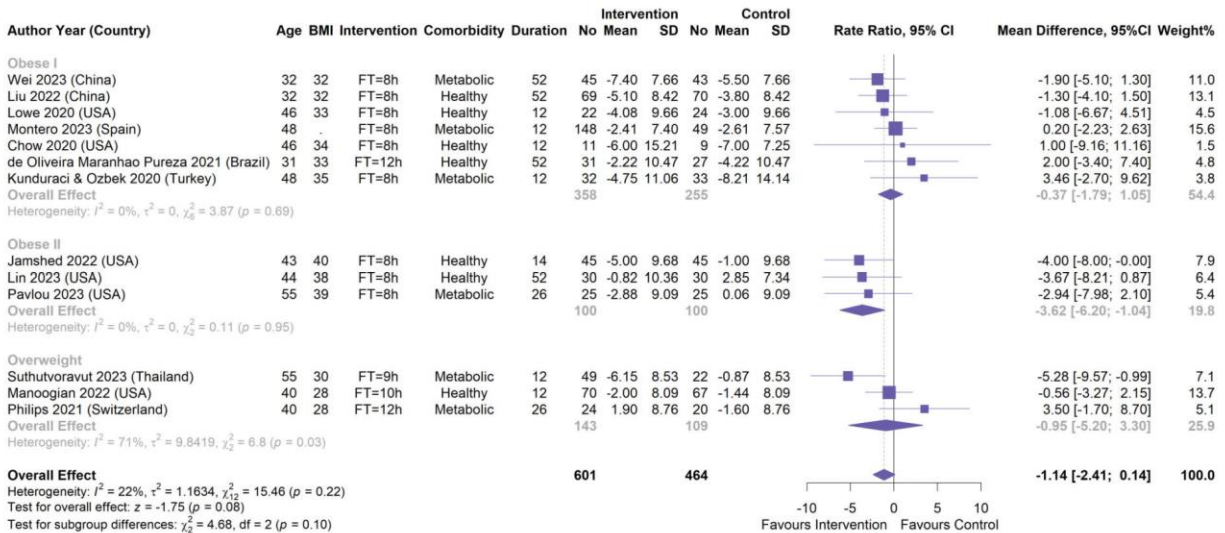

**eFigure 59: Meta-analysis of difference in mean difference (95% CIs) for the effect of time-restricted eating on diastolic blood pressure (mmHg), grouped by baseline BMI status.**

BMI: Body Mass Index; SD: Standard Deviation; CI: Confidence Interval; USA: United States of America; FT: Feeding Time; Duration: follow-up duration in weeks; 2M/3M/6M: 2, 3 or 6 meals; 3M+2S: 3 meals and 2 snacks; 3M+3S: 3 meals and 3 snacks; 10S: Grazing diet – 100kcal every 2-3 hours; HCB: High Calorie Breakfast; HCD: High Calorie Dinner; ED: Early Dinner; LD: Late Dinner; FL: Front Loading; EED: Equal Energy Distribution; ML: Middle Loading; BL: Back Loading.

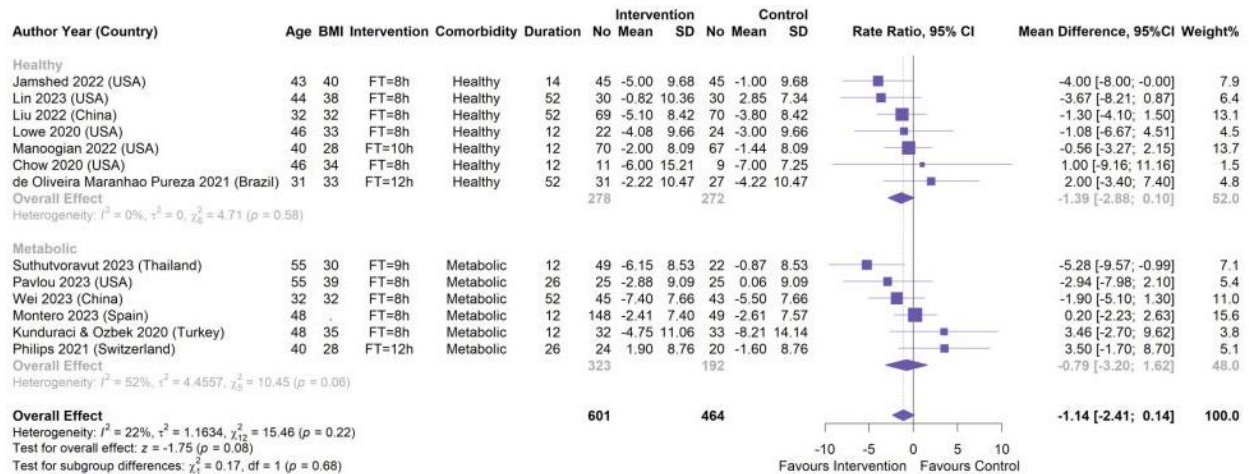

**eFigure 60: Meta-analysis of difference in mean difference (95% CIs) for the effect of time-restricted eating on diastolic blood pressure (mmHg), grouped by health status**

BMI: Body Mass Index; SD: Standard Deviation; CI: Confidence Interval; USA: United States of America; FT: Feeding Time; Duration: follow-up duration in weeks; 2M/3M/6M: 2, 3 or 6 meals; 3M+2S: 3 meals and 2 snacks; 3M+3S: 3 meals and 3 snacks; 10S: Grazing diet – 100kcal every 2-3 hours; HCB: High Calorie Breakfast; HCD: High Calorie Dinner; ED: Early Dinner; LD: Late Dinner; FL: Front Loading; EED: Equal Energy Distribution; ML: Middle Loading; BL: Back Loading.

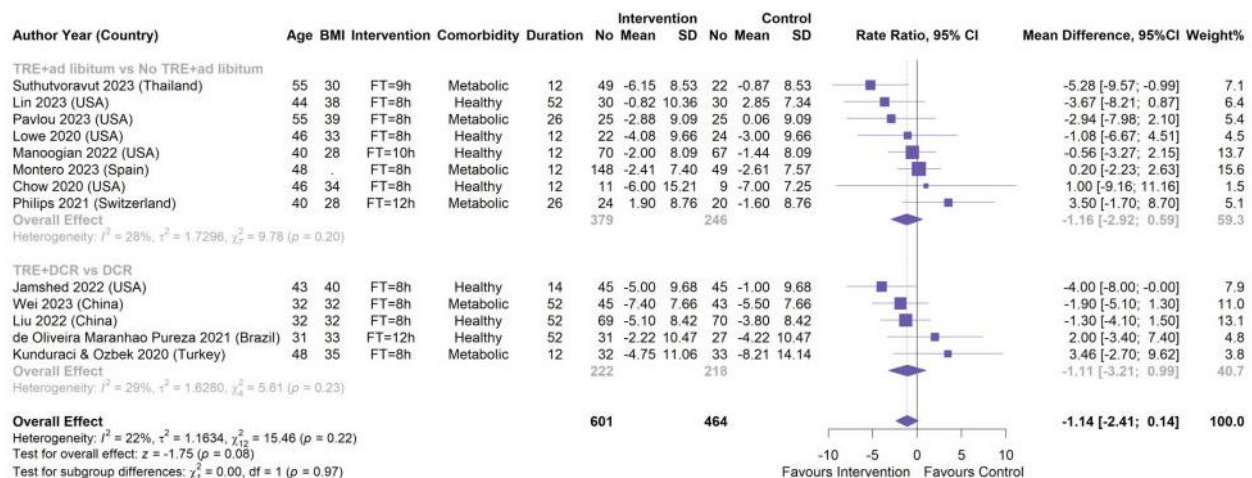

**eFigure 61: Meta-analysis of difference in mean difference (95% CIs) for the effect of time-restricted eating on Diastolic blood pressure (mmHg), grouped by energy prescription**

BMI: Body Mass Index; SD: Standard Deviation; CI: Confidence Interval; USA: United States of America; FT: Feeding Time; Duration: follow-up duration in weeks; 2M/3M/6M: 2, 3 or 6 meals; 3M+2S: 3 meals and 2 snacks; 3M+3S: 3 meals and 3 snacks; 10S: Grazing diet – 100kcal every 2-3 hours; HCB: High Calorie Breakfast; HCD: High Calorie Dinner; ED: Early Dinner; LD: Late Dinner; FL: Front Loading; EED: Equal Energy Distribution; ML: Middle Loading; BL: Back Loading.

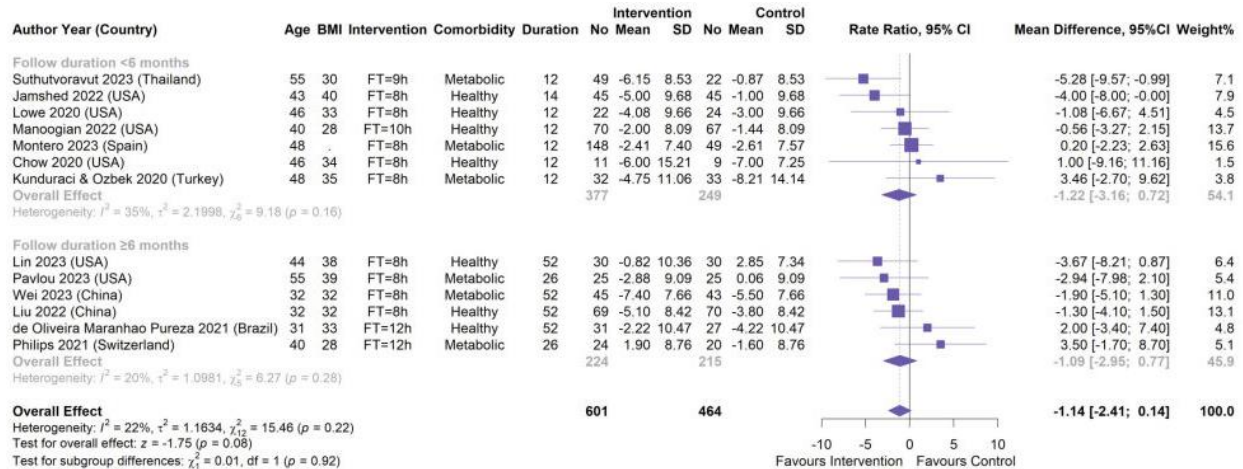

**eFigure 62: Meta-analysis of difference in mean difference (95% CIs) for the effect of time-restricted eating on Diastolic blood pressure (mmHg), grouped by follow duration**

BMI: Body Mass Index; SD: Standard Deviation; CI: Confidence Interval; USA: United States of America; FT: Feeding Time; Duration: follow-up duration in weeks; 2M/3M/6M: 2, 3 or 6 meals; 3M+2S: 3 meals and 2 snacks; 3M+3S: 3 meals and 3 snacks; 10S: Grazing diet – 100kcal every 2-3 hours; HCB: High Calorie Breakfast; HCD: High Calorie Dinner; ED: Early Dinner; LD: Late Dinner; FL: Front Loading; EED: Equal Energy Distribution; ML: Middle Loading; BL: Back Loading.

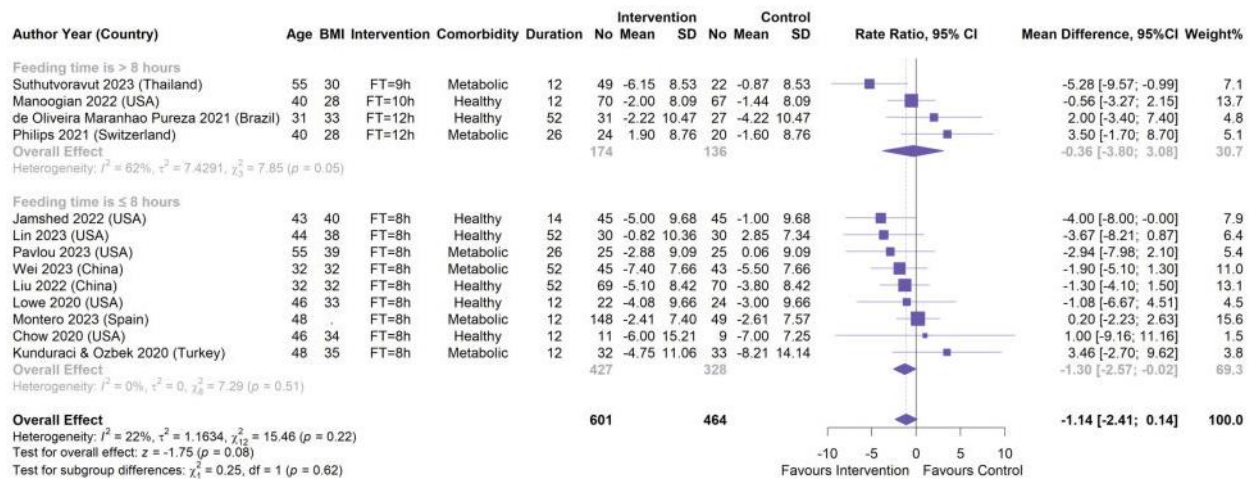

**eFigure 63: Meta-analysis of difference in mean difference (95% CIs) for the effect of time-restricted eating on Diastolic blood pressure (mmHg), grouped by eating window**

BMI: Body Mass Index; SD: Standard Deviation; CI: Confidence Interval; USA: United States of America; FT: Feeding Time; Duration: follow-up duration in weeks; 2M/3M/6M: 2, 3 or 6 meals; 3M+2S: 3 meals and 2 snacks; 3M+3S: 3 meals and 3 snacks; 10S: Grazing diet – 100kcal every 2-3 hours; HCB: High Calorie Breakfast; HCD: High Calorie Dinner; ED: Early Dinner; LD: Late Dinner; FL: Front Loading; EED: Equal Energy Distribution; ML: Middle Loading; BL: Back Loading.

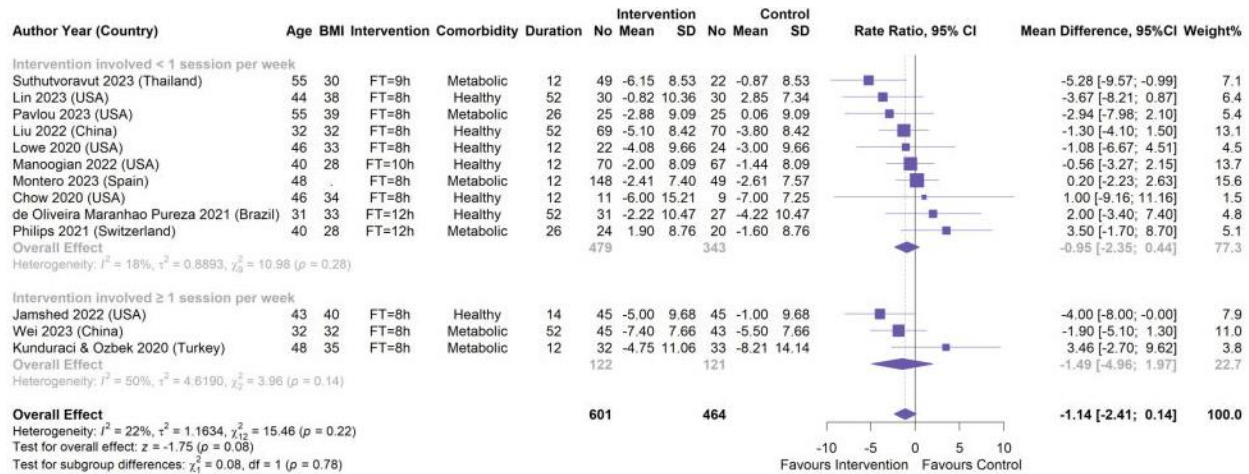

**eFigure 64: Meta-analysis of difference in mean difference (95% CIs) for the effect of time-restricted eating on Diastolic blood pressure (mmHg), grouped by frequency of contact**

BMI: Body Mass Index; SD: Standard Deviation; CI: Confidence Interval; USA: United States of America; FT: Feeding Time; Duration: follow-up duration in weeks; 2M/3M/6M: 2, 3 or 6 meals; 3M+2S: 3 meals and 2 snacks; 3M+3S: 3 meals and 3 snacks; 10S: Grazing diet – 100kcal every 2-3 hours; HCB: High Calorie Breakfast; HCD: High Calorie Dinner; ED: Early Dinner; LD: Late Dinner; FL: Front Loading; EED: Equal Energy Distribution; ML: Middle Loading; BL: Back Loading.

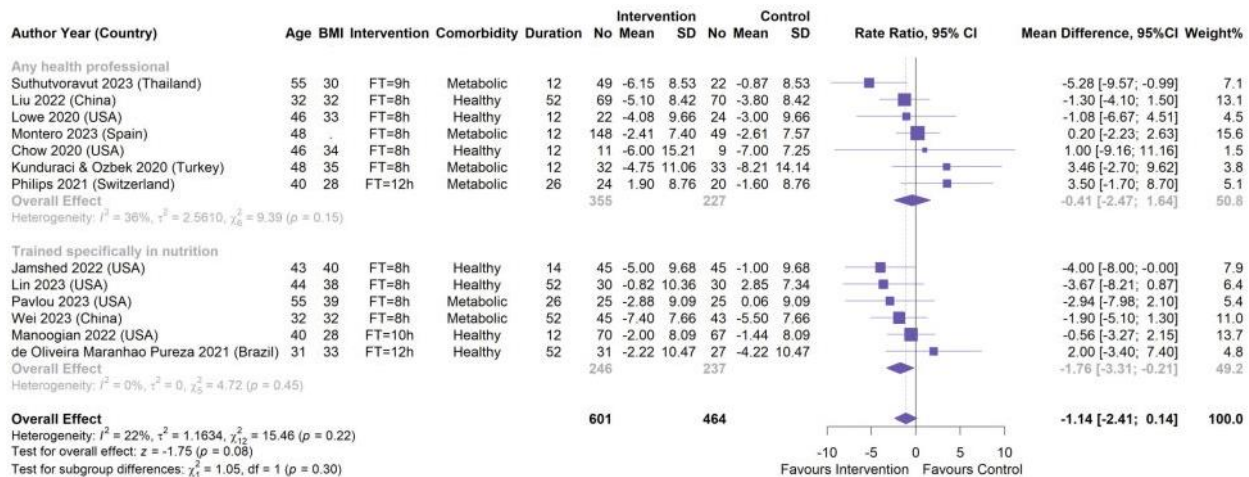

**eFigure 65: Meta-analysis of difference in mean difference (95% CIs) for the effect of time-restricted eating on Diastolic blood pressure (mmHg), grouped by delivery personnel**

BMI: Body Mass Index; SD: Standard Deviation; CI: Confidence Interval; USA: United States of America; FT: Feeding Time; Duration: follow-up duration in weeks; 2M/3M/6M: 2, 3 or 6 meals; 3M+2S: 3 meals and 2 snacks; 3M+3S: 3 meals and 3 snacks; 10S: Grazing diet – 100kcal every 2-3 hours; HCB: High Calorie Breakfast; HCD: High Calorie Dinner; ED: Early Dinner; LD: Late Dinner; FL: Front Loading; EED: Equal Energy Distribution; ML: Middle Loading; BL: Back Loading.

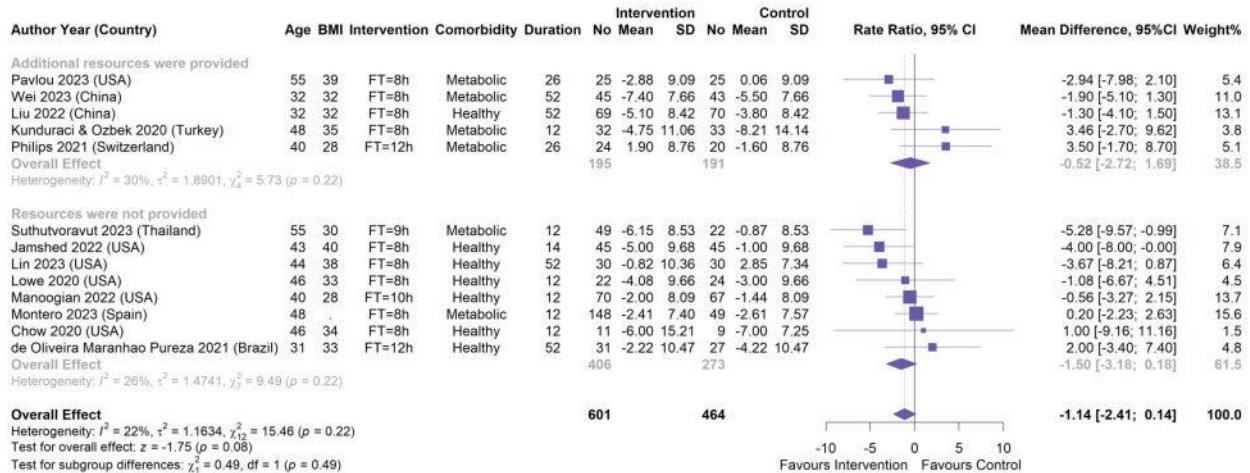

**eFigure 66: Meta-analysis of difference in mean difference (95% CIs) for the effect of time-restricted eating on Diastolic blood pressure (mmHg), grouped by resource provision**

BMI: Body Mass Index; SD: Standard Deviation; CI: Confidence Interval; USA: United States of America; FT: Feeding Time; Duration: follow-up duration in weeks; 2M/3M/6M: 2, 3 or 6 meals; 3M+2S: 3 meals and 2 snacks; 3M+3S: 3 meals and 3 snacks; 10S: Grazing diet – 100kcal every 2-3 hours; HCB: High Calorie Breakfast; HCD: High Calorie Dinner; ED: Early Dinner; LD: Late Dinner; FL: Front Loading; EED: Equal Energy Distribution; ML: Middle Loading; BL: Back Loading.

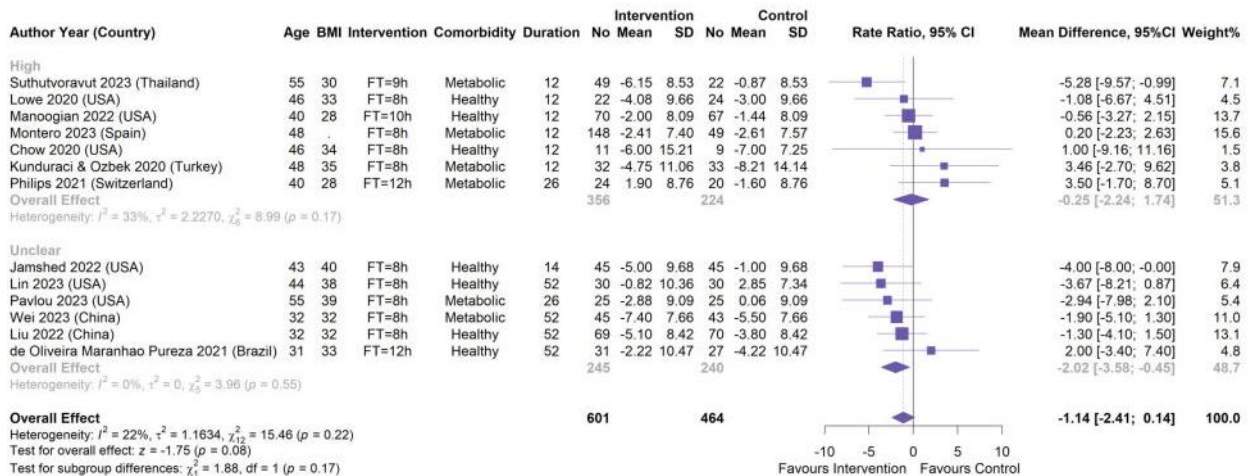

**eFigure 67: Meta-analysis of difference in mean difference (95% CIs) for the effect of time-restricted eating on Diastolic blood pressure (mmHg), grouped by risk of bias**

BMI: Body Mass Index; SD: Standard Deviation; CI: Confidence Interval; USA: United States of America; FT: Feeding Time; Duration: follow-up duration in weeks; 2M/3M/6M: 2, 3 or 6 meals; 3M+2S: 3 meals and 2 snacks; 3M+3S: 3 meals and 3 snacks; 10S: Grazing diet – 100kcal every 2-3 hours; HCB: High Calorie Breakfast; HCD: High Calorie Dinner; ED: Early Dinner; LD: Late Dinner; FL: Front Loading; EED: Equal Energy Distribution; ML: Middle Loading; BL: Back Loading.

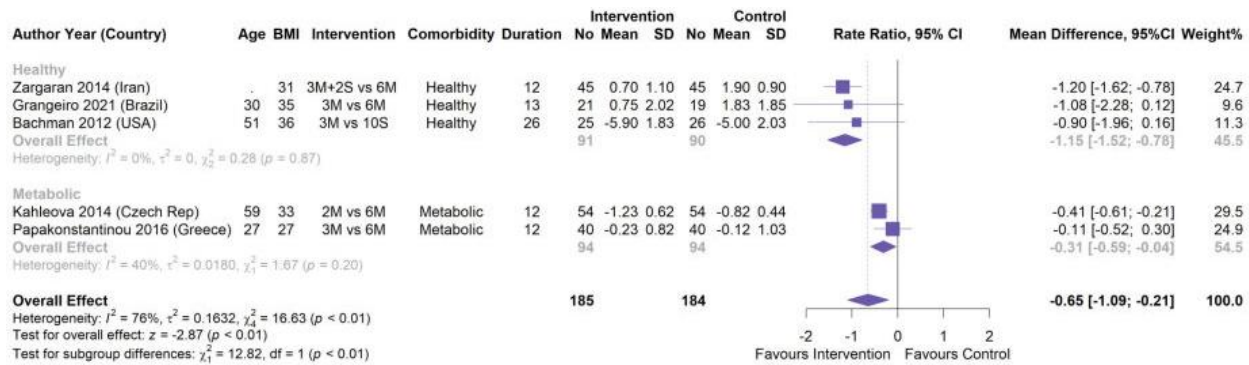

**eFigure 68: Meta-analysis of difference in mean difference (95% CIs) for the effect of meal frequency on BMI (kg/m<sup>2</sup>), grouped by health status**

BMI: Body Mass Index; SD: Standard Deviation; CI: Confidence Interval; USA: United States of America; FT: Feeding Time; Duration: follow-up duration in weeks; 2M/3M/6M: 2, 3 or 6 meals; 3M+2S: 3 meals and 2 snacks; 3M+3S: 3 meals and 3 snacks; 10S: Grazing diet – 100kcal every 2-3 hours; HCB: High Calorie Breakfast; HCD: High Calorie Dinner; ED: Early Dinner; LD: Late Dinner; FL: Front Loading; EED: Equal Energy Distribution; ML: Middle Loading; BL: Back Loading.

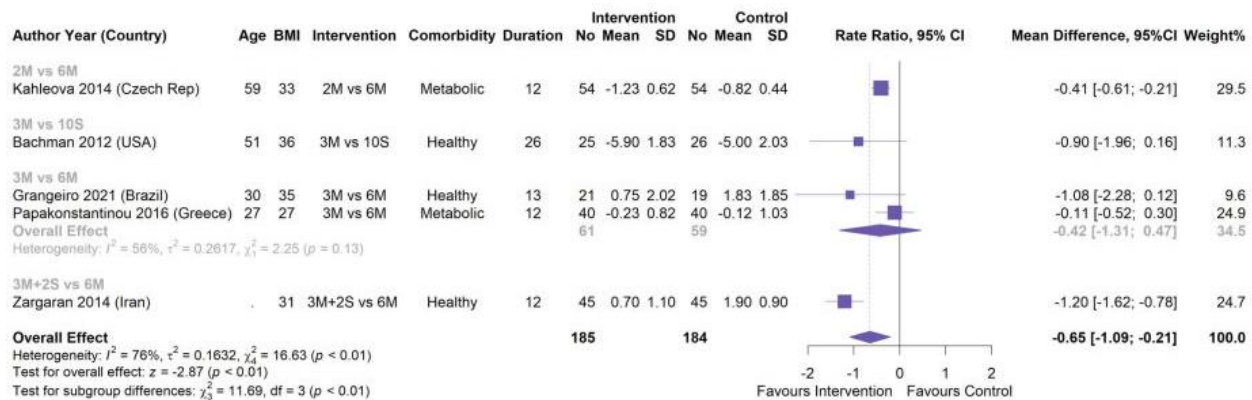

**eFigure 69: Meta-analysis of difference in mean difference (95% CIs) for the effect of meal frequency on BMI (kg/m<sup>2</sup>), grouped by intervention intensity**

BMI: Body Mass Index; SD: Standard Deviation; CI: Confidence Interval; USA: United States of America; FT: Feeding Time; Duration: follow-up duration in weeks; 2M/3M/6M: 2, 3 or 6 meals; 3M+2S: 3 meals and 2 snacks; 3M+3S: 3 meals and 3 snacks; 10S: Grazing diet – 100kcal every 2-3 hours; HCB: High Calorie Breakfast; HCD: High Calorie Dinner; ED: Early Dinner; LD: Late Dinner; FL: Front Loading; EED: Equal Energy Distribution; ML: Middle Loading; BL: Back Loading.

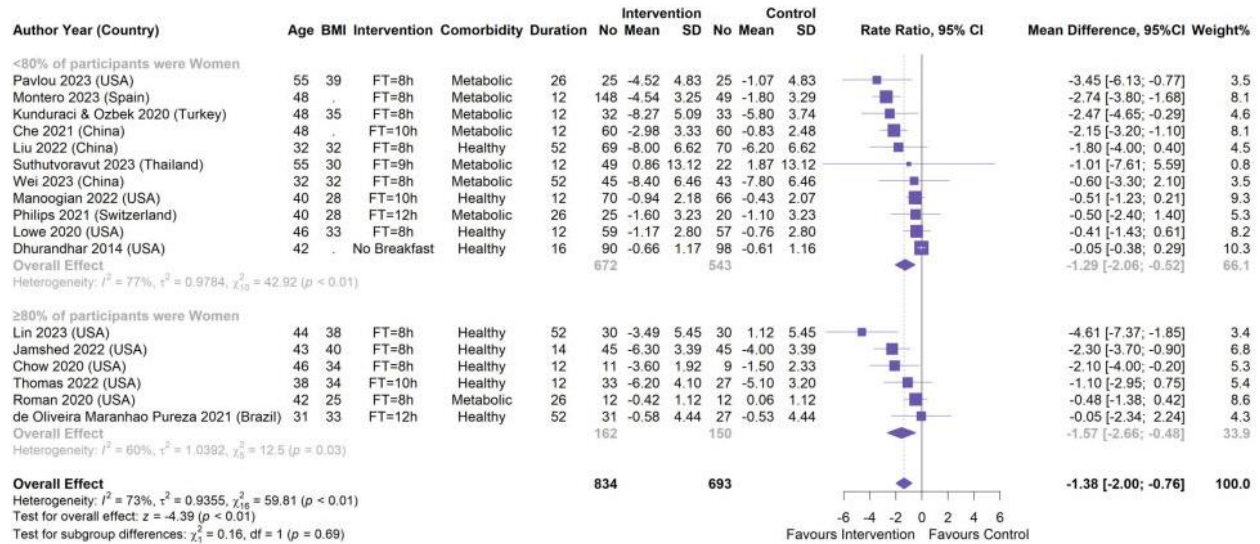

**eFigure 70: Meta-analysis of difference in mean difference (95% CIs) for the effect of time restricted eating on weight (kg), grouped by gender proportion**

BMI: Body Mass Index; SD: Standard Deviation; CI: Confidence Interval; USA: United States of America; FT: Feeding Time; Duration: follow-up duration in weeks; 2M/3M/6M: 2, 3 or 6 meals; 3M+2S: 3 meals and 2 snacks; 3M+3S: 3 meals and 3 snacks; 10S: Grazing diet – 100kcal every 2-3 hours; HCB: High Calorie Breakfast; HCD: High Calorie Dinner; ED: Early Dinner; LD: Late Dinner; FL: Front Loading; EED: Equal Energy Distribution; ML: Middle Loading; BL: Back Loading.

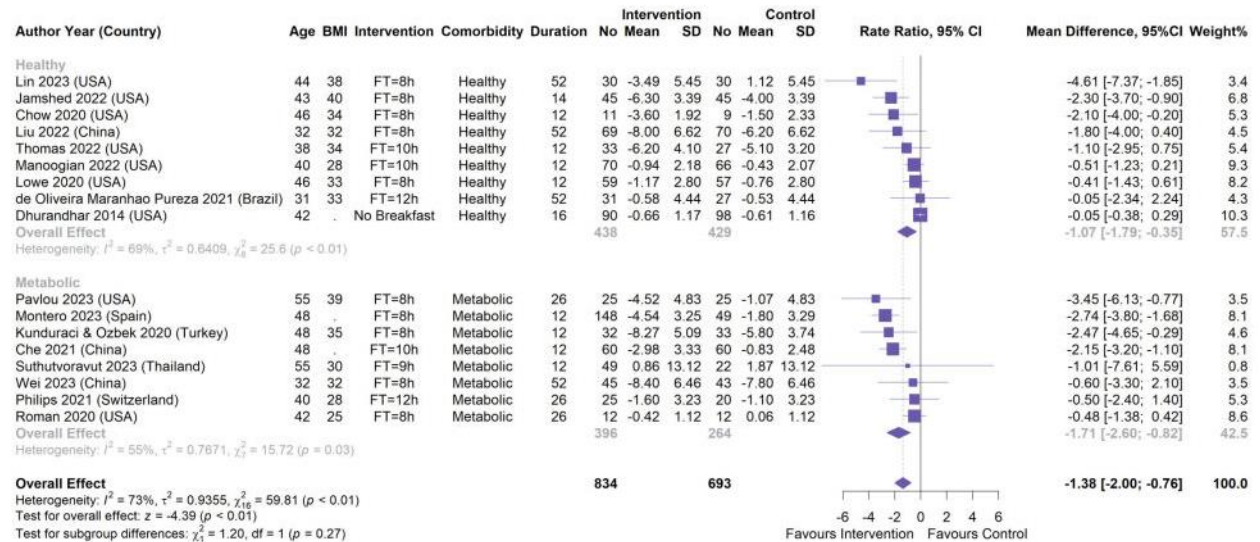

**eFigure 71: Meta-analysis of difference in mean difference (95% CIs) for the effect of time restricted eating on weight (kg), grouped by health status**

BMI: Body Mass Index; SD: Standard Deviation; CI: Confidence Interval; USA: United States of America; FT: Feeding Time; Duration: follow-up duration in weeks; 2M/3M/6M: 2, 3 or 6 meals; 3M+2S: 3 meals and 2 snacks; 3M+3S: 3 meals and 3 snacks; 10S: Grazing diet – 100kcal every 2-3 hours; HCB: High Calorie Breakfast; HCD: High Calorie Dinner; ED: Early Dinner; LD: Late Dinner; FL: Front Loading; EED: Equal Energy Distribution; ML: Middle Loading; BL: Back Loading.



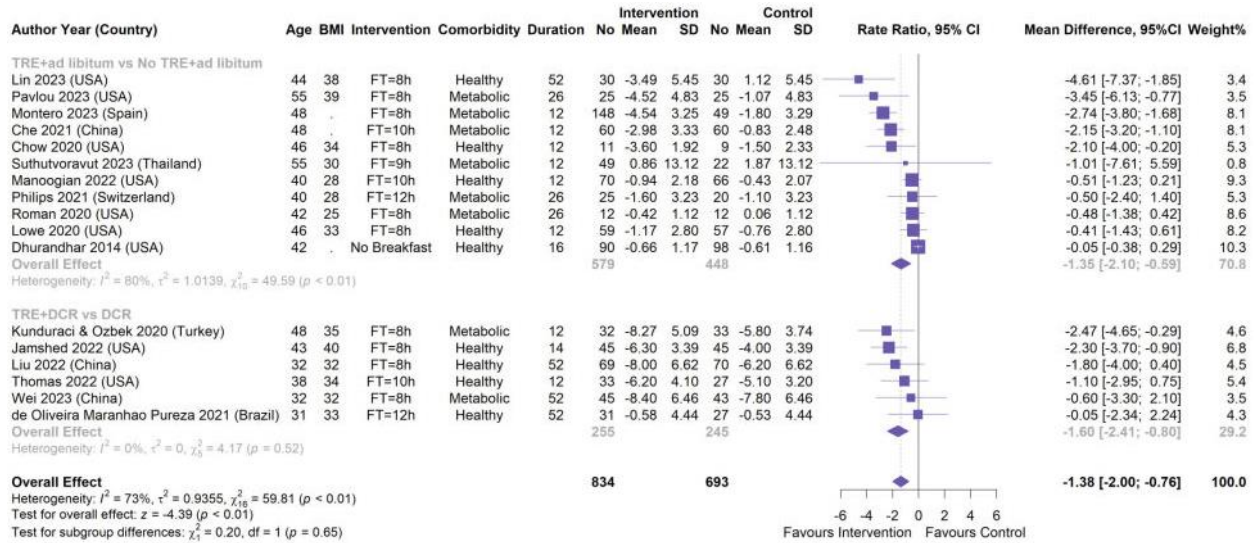

**eFigure 72: Meta-analysis of difference in mean difference (95% CIs) for the effect of time restricted eating on weight (kg), grouped by energy prescription**

BMI: Body Mass Index; SD: Standard Deviation; CI: Confidence Interval; USA: United States of America; FT: Feeding Time; Duration: follow-up duration in weeks; 2M/3M/6M: 2, 3 or 6 meals; 3M+2S: 3 meals and 2 snacks; 3M+3S: 3 meals and 3 snacks; 10S: Grazing diet – 100kcal every 2-3 hours; HCB: High Calorie Breakfast; HCD: High Calorie Dinner; ED: Early Dinner; LD: Late Dinner; FL: Front Loading; EED: Equal Energy Distribution; ML: Middle Loading; BL: Back Loading.

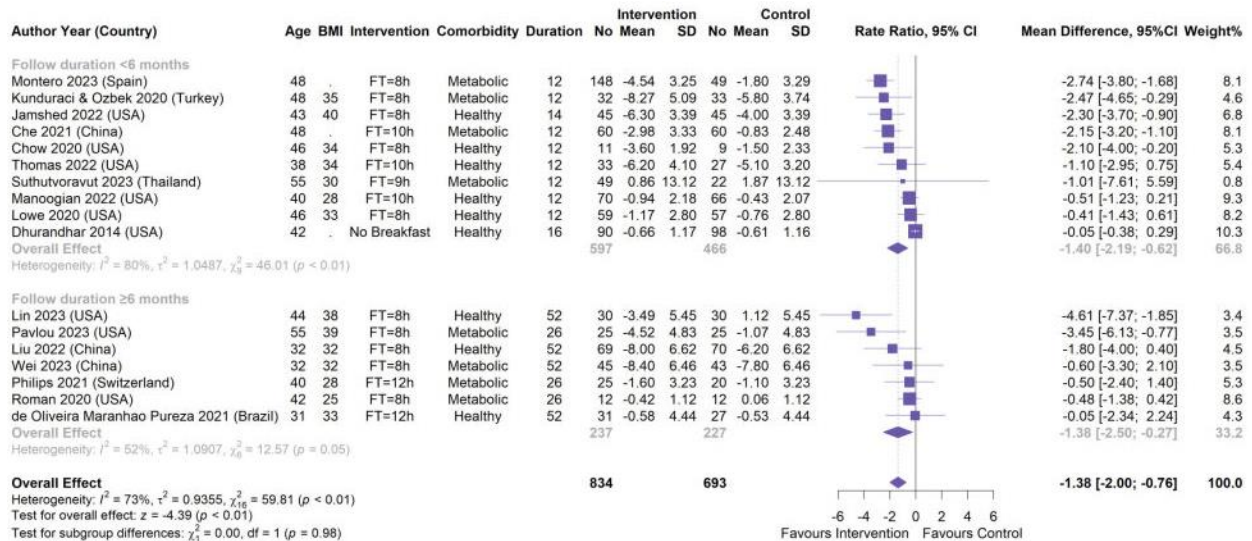

**eFigure 73: Meta-analysis of difference in mean difference (95% CIs) for the effect of time restricted eating on weight (kg), grouped by follow duration**

BMI: Body Mass Index; SD: Standard Deviation; CI: Confidence Interval; USA: United States of America; FT: Feeding Time; Duration: follow-up duration in weeks; 2M/3M/6M: 2, 3 or 6 meals; 3M+2S: 3 meals and 2 snacks; 3M+3S: 3 meals and 3 snacks; 10S: Grazing diet – 100kcal every 2-3 hours; HCB: High Calorie Breakfast; HCD: High Calorie Dinner; ED: Early Dinner; LD: Late Dinner; FL: Front Loading; EED: Equal Energy Distribution; ML: Middle Loading; BL: Back Loading.

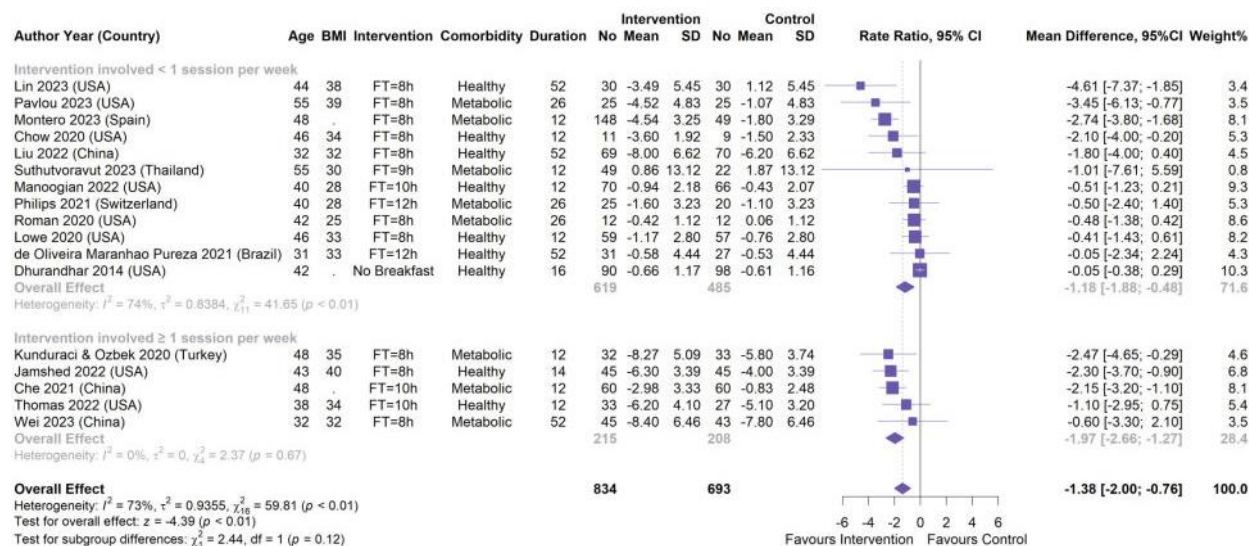

**eFigure 74: Meta-analysis of difference in mean difference (95% CIs) for the effect of time restricted eating on weight (kg), grouped by frequency of contact**

BMI: Body Mass Index; SD: Standard Deviation; CI: Confidence Interval; USA: United States of America; FT: Feeding Time; Duration: follow-up duration in weeks; 2M/3M/6M: 2, 3 or 6 meals; 3M+2S: 3 meals and 2 snacks; 3M+3S: 3 meals and 3 snacks; 10S: Grazing diet – 100kcal every 2-3 hours; HCB: High Calorie Breakfast; HCD: High Calorie Dinner; ED: Early Dinner; LD: Late Dinner; FL: Front Loading; EED: Equal Energy Distribution; ML: Middle Loading; BL: Back Loading.

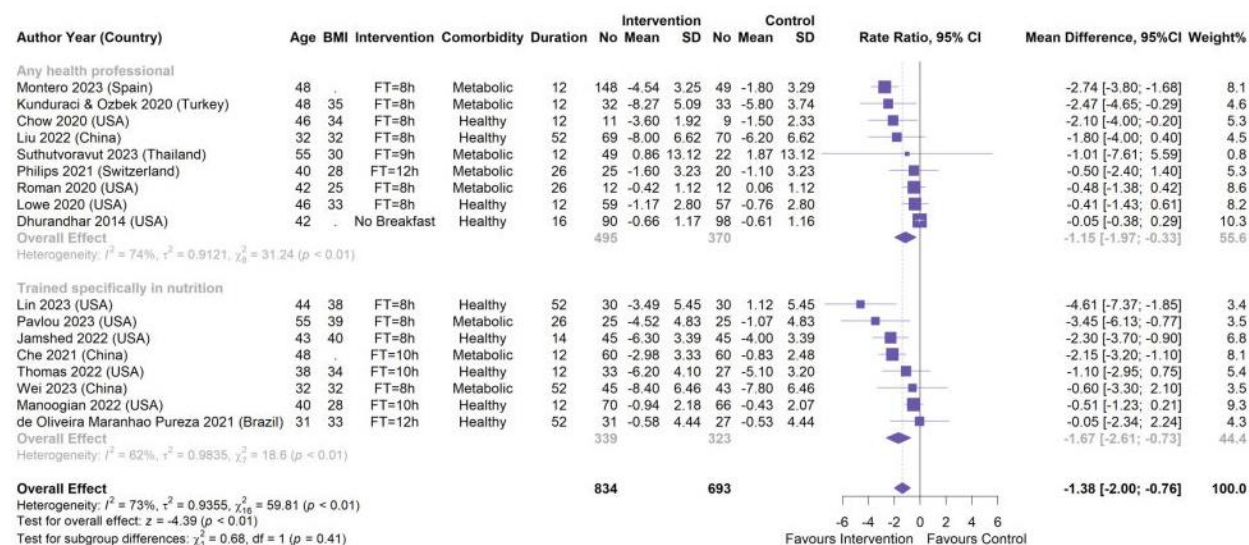

**eFigure 75: Meta-analysis of difference in mean difference (95% CIs) for the effect of time restricted eating on weight (kg), grouped by delivery personnel**

BMI: Body Mass Index; SD: Standard Deviation; CI: Confidence Interval; USA: United States of America; FT: Feeding Time; Duration: follow-up duration in weeks; 2M/3M/6M: 2, 3 or 6 meals; 3M+2S: 3 meals and 2 snacks; 3M+3S: 3 meals and 3 snacks; 10S: Grazing diet – 100kcal every 2-3 hours; HCB: High Calorie Breakfast; HCD: High Calorie Dinner; ED: Early Dinner; LD: Late Dinner; FL: Front Loading; EED: Equal Energy Distribution; ML: Middle Loading; BL: Back Loading.

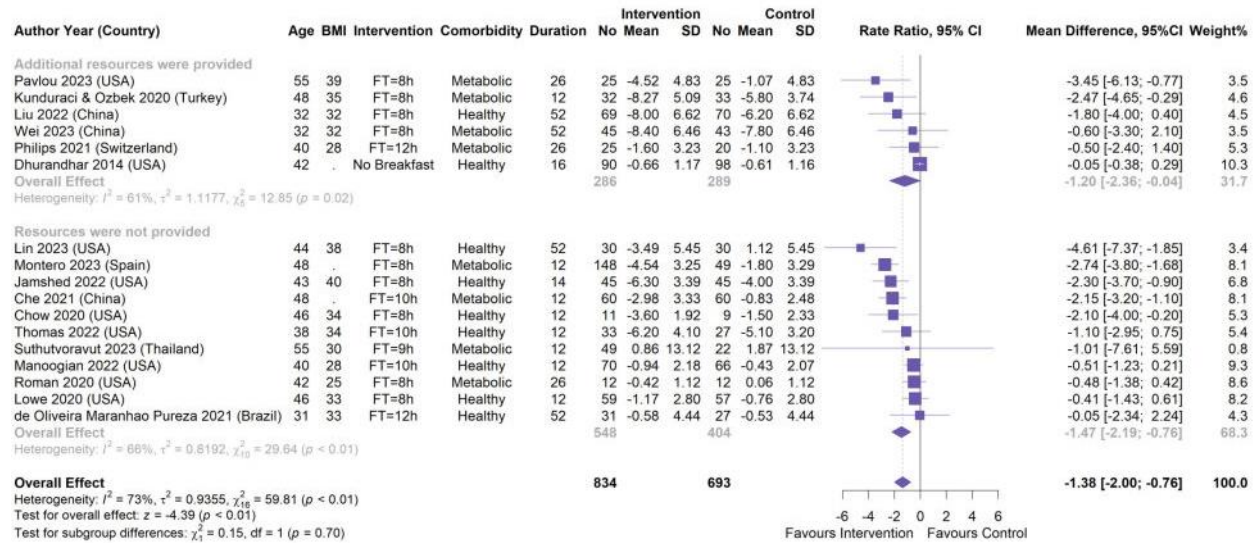

**eFigure 76: Meta-analysis of difference in mean difference (95% CIs) for the effect of time restricted eating on weight (kg), grouped by resource provision**

BMI: Body Mass Index; SD: Standard Deviation; CI: Confidence Interval; USA: United States of America; FT: Feeding Time; Duration: follow-up duration in weeks; 2M/3M/6M: 2, 3 or 6 meals; 3M+2S: 3 meals and 2 snacks; 3M+3S: 3 meals and 3 snacks; 10S: Grazing diet – 100kcal every 2-3 hours; HCB: High Calorie Breakfast; HCD: High Calorie Dinner; ED: Early Dinner; LD: Late Dinner; FL: Front Loading; EED: Equal Energy Distribution; ML: Middle Loading; BL: Back Loading.

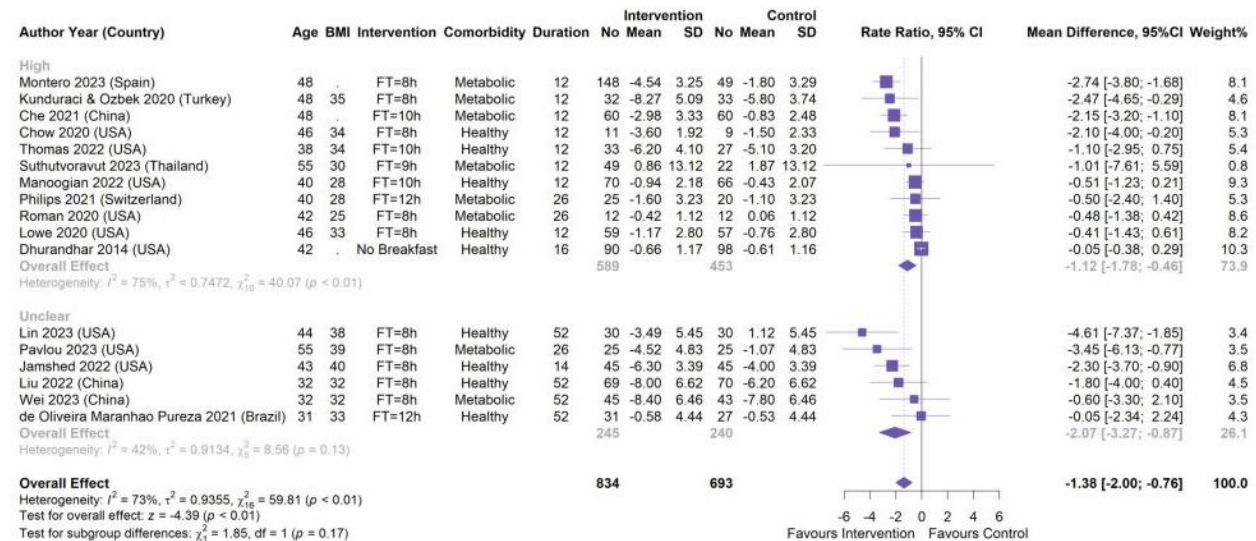

**eFigure 77: Meta-analysis of difference in mean difference (95% CIs) for the effect of time restricted eating on weight (kg), grouped by risk of bias**

BMI: Body Mass Index; SD: Standard Deviation; CI: Confidence Interval; USA: United States of America; FT: Feeding Time; Duration: follow-up duration in weeks; 2M/3M/6M: 2, 3 or 6 meals; 3M+2S: 3 meals and 2 snacks; 3M+3S: 3 meals and 3 snacks; 10S: Grazing diet – 100kcal every 2-3 hours; HCB: High Calorie Breakfast; HCD: High Calorie Dinner; ED: Early Dinner; LD: Late Dinner; FL: Front Loading; EED: Equal Energy Distribution; ML: Middle Loading; BL: Back Loading.

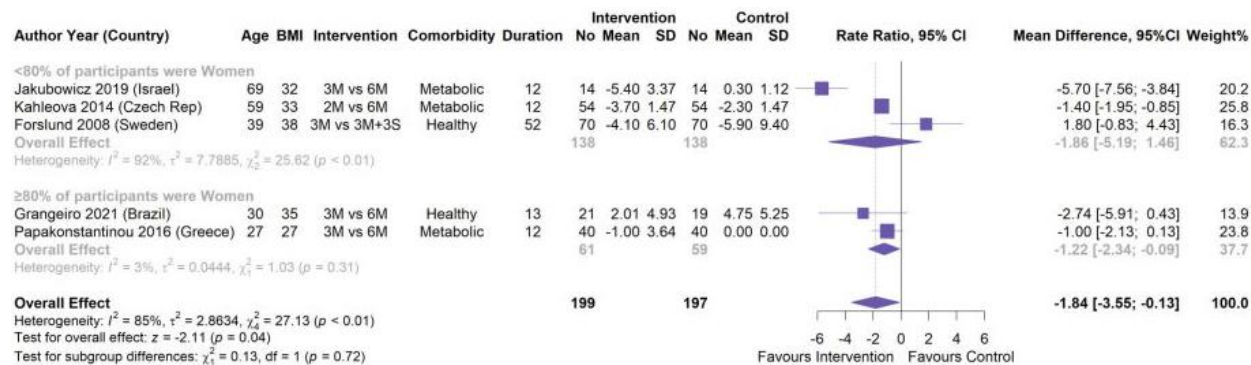

**eFigure 78: Meta-analysis of difference in mean difference (95% CIs) for the effect of meal frequency on weight (kg), grouped by gender proportion**

BMI: Body Mass Index; SD: Standard Deviation; CI: Confidence Interval; USA: United States of America; FT: Feeding Time; Duration: follow-up duration in weeks; 2M/3M/6M: 2, 3 or 6 meals; 3M+2S: 3 meals and 2 snacks; 3M+3S: 3 meals and 3 snacks; 10S: Grazing diet – 100kcal every 2-3 hours; HCB: High Calorie Breakfast; HCD: High Calorie Dinner; ED: Early Dinner; LD: Late Dinner; FL: Front Loading; EED: Equal Energy Distribution; ML: Middle Loading; BL: Back Loading.

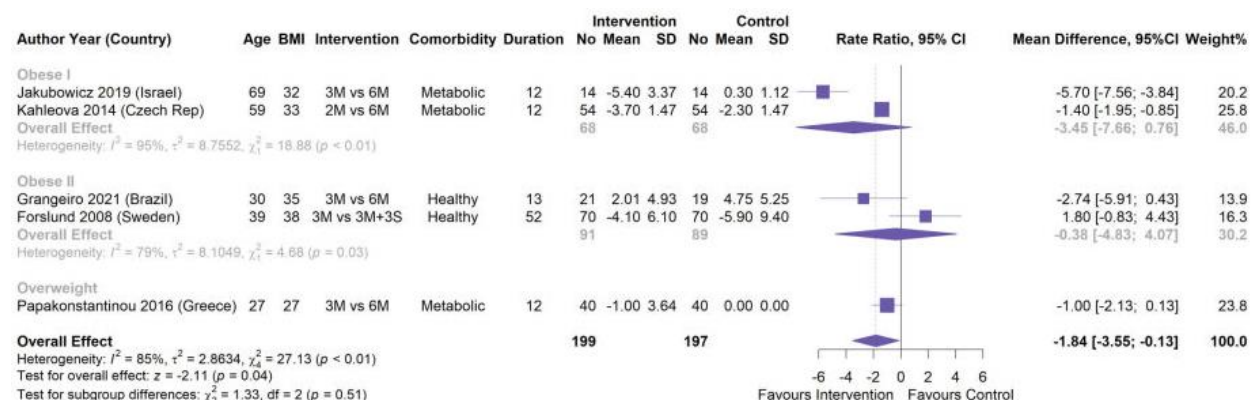

**eFigure 79: Meta-analysis of difference in mean difference (95% CIs) for the effect of meal frequency on weight (kg), grouped by baseline BMI status**

BMI: Body Mass Index; SD: Standard Deviation; CI: Confidence Interval; USA: United States of America; FT: Feeding Time; Duration: follow-up duration in weeks; 2M/3M/6M: 2, 3 or 6 meals; 3M+2S: 3 meals and 2 snacks; 3M+3S: 3 meals and 3 snacks; 10S: Grazing diet – 100kcal every 2-3 hours; HCB: High Calorie Breakfast; HCD: High Calorie Dinner; ED: Early Dinner; LD: Late Dinner; FL: Front Loading; EED: Equal Energy Distribution; ML: Middle Loading; BL: Back Loading.

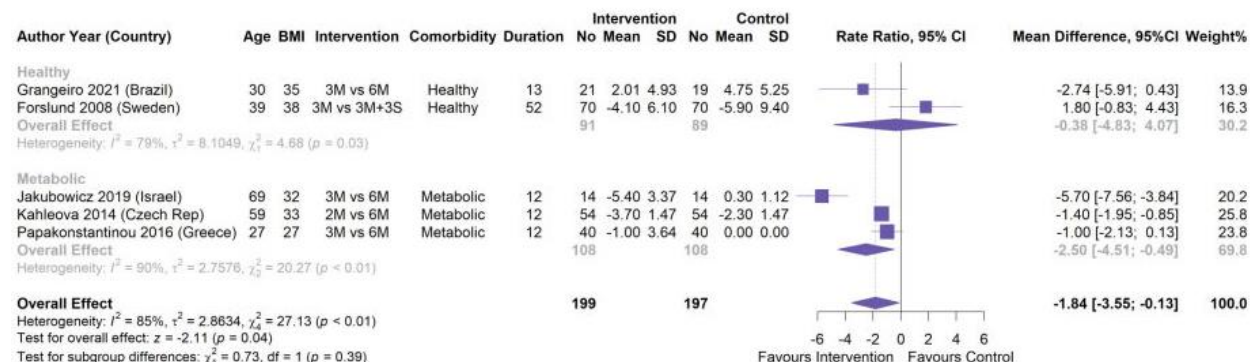

**eFigure 80: Meta-analysis of difference in mean difference (95% CIs) for the effect of meal frequency on weight (kg), grouped by health status**

BMI: Body Mass Index; SD: Standard Deviation; CI: Confidence Interval; USA: United States of America; FT: Feeding Time; Duration: follow-up duration in weeks; 2M/3M/6M: 2, 3 or 6 meals; 3M+2S: 3 meals and 2 snacks; 3M+3S: 3 meals and 3 snacks; 10S: Grazing diet – 100kcal every 2-3 hours; HCB: High Calorie Breakfast; HCD: High Calorie Dinner; ED: Early Dinner; LD: Late Dinner; FL: Front Loading; EED: Equal Energy Distribution; ML: Middle Loading; BL: Back Loading.

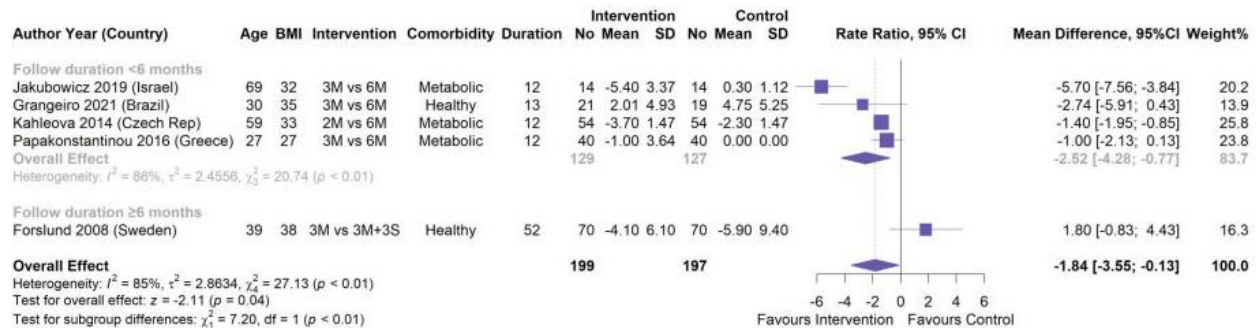

**eFigure 81: Meta-analysis of difference in mean difference (95% CIs) for the effect of meal frequency on weight (kg), grouped by follow duration**

BMI: Body Mass Index; SD: Standard Deviation; CI: Confidence Interval; USA: United States of America; FT: Feeding Time; Duration: follow-up duration in weeks; 2M/3M/6M: 2, 3 or 6 meals; 3M+2S: 3 meals and 2 snacks; 3M+3S: 3 meals and 3 snacks; 10S: Grazing diet – 100kcal every 2-3 hours; HCB: High Calorie Breakfast; HCD: High Calorie Dinner; ED: Early Dinner; LD: Late Dinner; FL: Front Loading; EED: Equal Energy Distribution; ML: Middle Loading; BL: Back Loading.

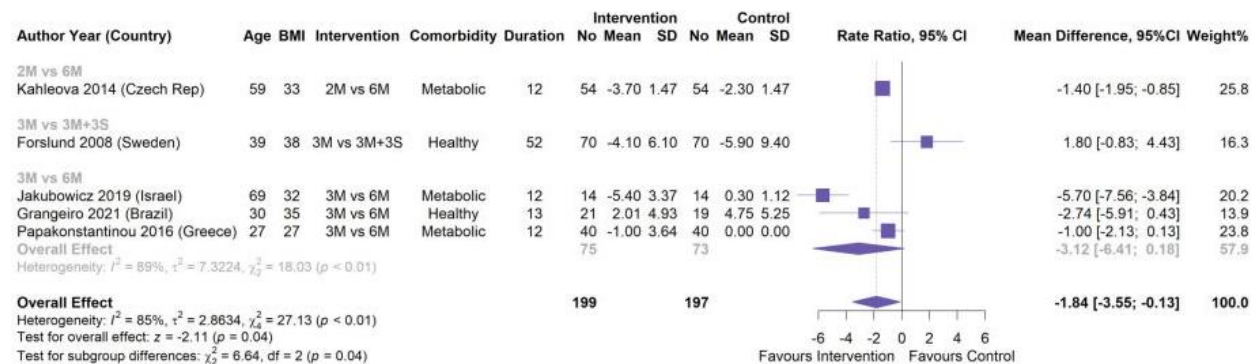

**eFigure 82: Meta-analysis of difference in mean difference (95% CIs) for the effect of meal frequency on weight (kg), grouped by intervention intensity**

BMI: Body Mass Index; SD: Standard Deviation; CI: Confidence Interval; USA: United States of America; FT: Feeding Time; Duration: follow-up duration in weeks; 2M/3M/6M: 2, 3 or 6 meals; 3M+2S: 3 meals and 2 snacks; 3M+3S: 3 meals and 3 snacks; 10S: Grazing diet – 100kcal every 2-3 hours; HCB: High Calorie Breakfast; HCD: High Calorie Dinner; ED: Early Dinner; LD: Late Dinner; FL: Front Loading; EED: Equal Energy Distribution; ML: Middle Loading; BL: Back Loading.

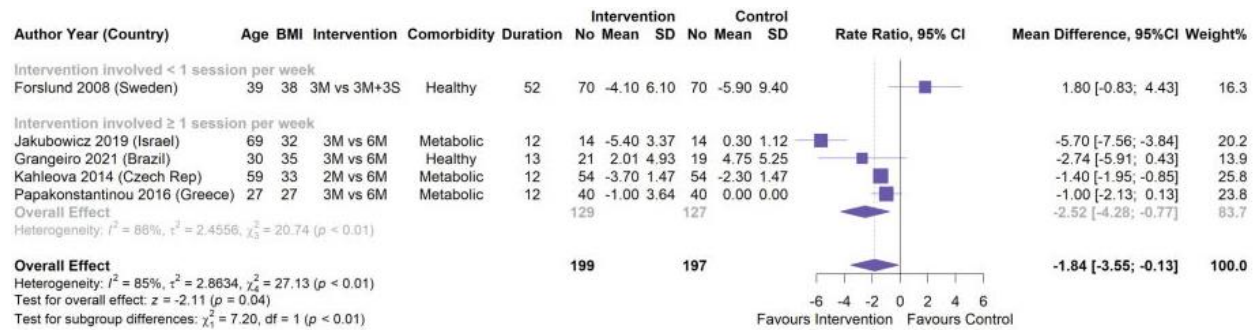

**eFigure 83: Meta-analysis of difference in mean difference (95% CIs) for the effect of meal frequency on weight (kg), grouped by frequency of contact**

BMI: Body Mass Index; SD: Standard Deviation; CI: Confidence Interval; USA: United States of America; FT: Feeding Time; Duration: follow-up duration in weeks; 2M/3M/6M: 2, 3 or 6 meals; 3M+2S: 3 meals and 2 snacks; 3M+3S: 3 meals and 3 snacks; 10S: Grazing diet – 100kcal every 2-3 hours; HCB: High Calorie Breakfast; HCD: High Calorie Dinner; ED: Early Dinner; LD: Late Dinner; FL: Front Loading; EED: Equal Energy Distribution; ML: Middle Loading; BL: Back Loading.

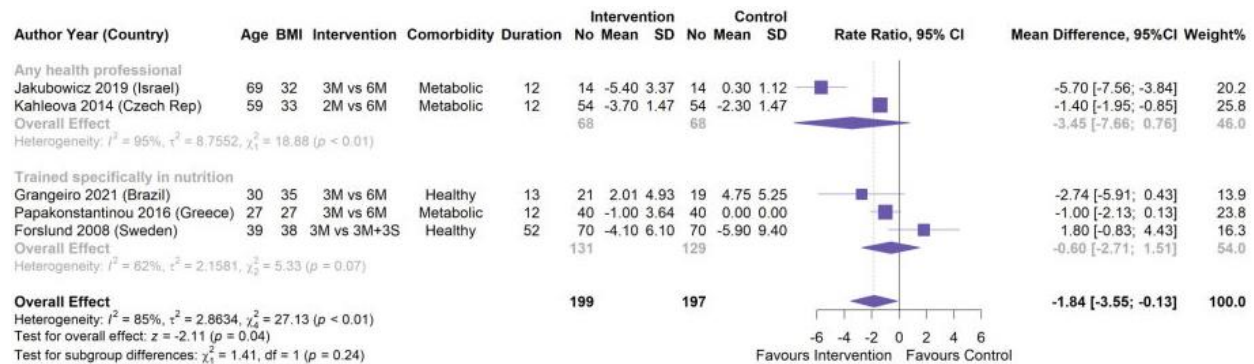

**eFigure 84: Meta-analysis of difference in mean difference (95% CIs) for the effect of meal frequency on weight (kg), grouped by delivery personnel**

BMI: Body Mass Index; SD: Standard Deviation; CI: Confidence Interval; USA: United States of America; FT: Feeding Time; Duration: follow-up duration in weeks; 2M/3M/6M: 2, 3 or 6 meals; 3M+2S: 3 meals and 2 snacks; 3M+3S: 3 meals and 3 snacks; 10S: Grazing diet – 100kcal every 2-3 hours; HCB: High Calorie Breakfast; HCD: High Calorie Dinner; ED: Early Dinner; LD: Late Dinner; FL: Front Loading; EED: Equal Energy Distribution; ML: Middle Loading; BL: Back Loading.

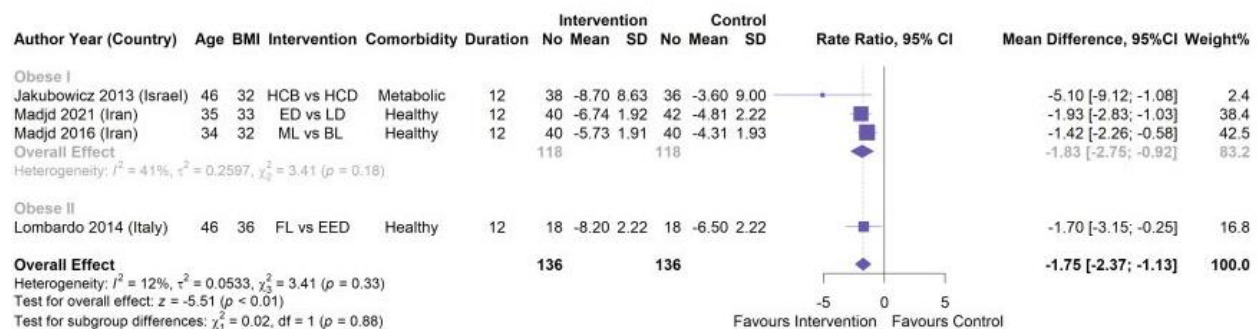

**eFigure 85: Meta-analysis of difference in mean difference (95% CIs) for the effect of meal distribution on weight (kg), grouped by baseline BMI status**

BMI: Body Mass Index; SD: Standard Deviation; CI: Confidence Interval; USA: United States of America; FT: Feeding Time; Duration: follow-up duration in weeks; 2M/3M/6M: 2, 3 or 6 meals; 3M+2S: 3 meals and 2 snacks; 3M+3S: 3 meals and 3 snacks; 10S: Grazing diet – 100kcal every 2-3 hours; HCB: High Calorie Breakfast; HCD: High Calorie Dinner; ED: Early Dinner; LD: Late Dinner; FL: Front Loading; EED: Equal Energy Distribution; ML: Middle Loading; BL: Back Loading.

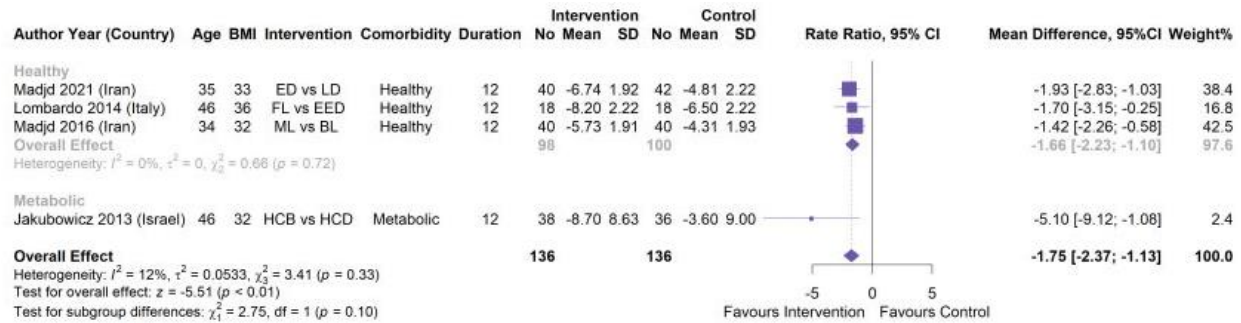

**eFigure 86: Meta-analysis of difference in mean difference (95% CIs) for the effect of meal distribution on weight (kg), grouped by health status**

BMI: Body Mass Index; SD: Standard Deviation; CI: Confidence Interval; USA: United States of America; FT: Feeding Time; Duration: follow-up duration in weeks; 2M/3M/6M: 2, 3 or 6 meals; 3M+2S: 3 meals and 2 snacks; 3M+3S: 3 meals and 3 snacks; 10S: Grazing diet – 100kcal every 2-3 hours; HCB: High Calorie Breakfast; HCD: High Calorie Dinner; ED: Early Dinner; LD: Late Dinner; FL: Front Loading; EED: Equal Energy Distribution; ML: Middle Loading; BL: Back Loading.

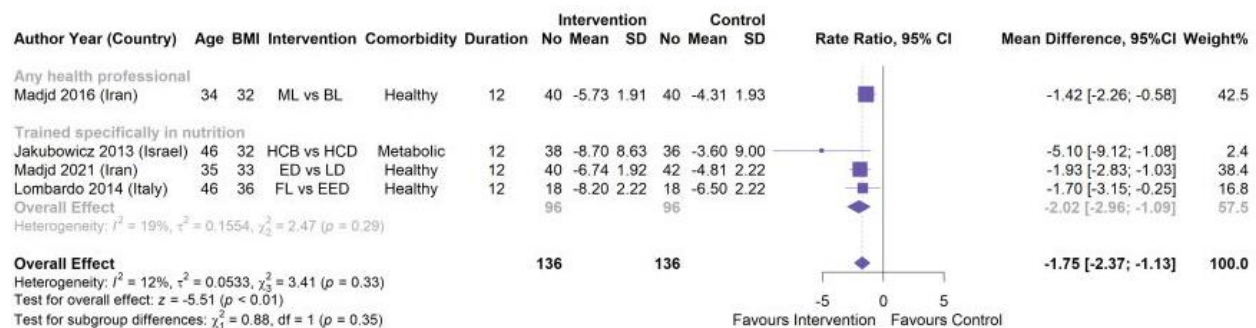

**eFigure 87: Meta-analysis of difference in mean difference (95% CIs) for the effect of meal distribution on weight (kg), grouped by delivery personnel**

BMI: Body Mass Index; SD: Standard Deviation; CI: Confidence Interval; USA: United States of America; FT: Feeding Time; Duration: follow-up duration in weeks; 2M/3M/6M: 2, 3 or 6 meals; 3M+2S: 3 meals and 2 snacks; 3M+3S: 3 meals and 3 snacks; 10S: Grazing diet – 100kcal every 2-3 hours; HCB: High Calorie Breakfast; HCD: High Calorie Dinner; ED: Early Dinner; LD: Late Dinner; FL: Front Loading; EED: Equal Energy Distribution; ML: Middle Loading; BL: Back Loading.

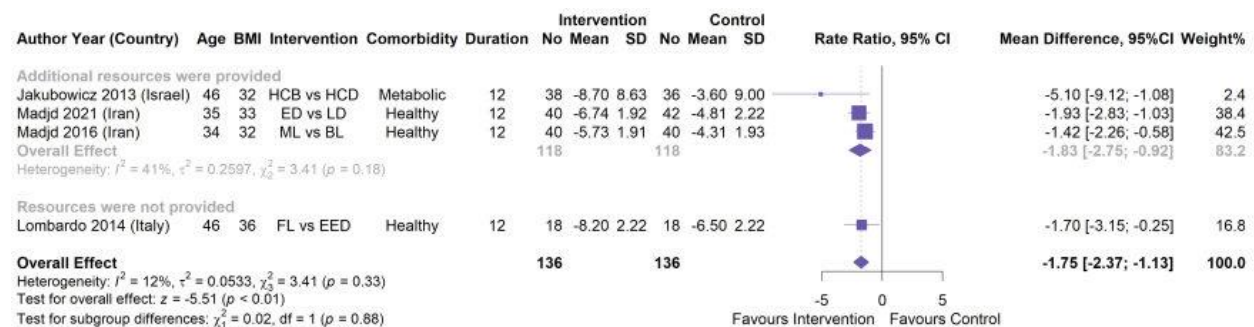

**eFigure 88: Meta-analysis of difference in mean difference (95% CIs) for the effect of meal distribution on weight (kg), grouped by resource provision**

BMI: Body Mass Index; SD: Standard Deviation; CI: Confidence Interval; USA: United States of America; FT: Feeding Time; Duration: follow-up duration in weeks; 2M/3M/6M: 2, 3 or 6 meals; 3M+2S: 3 meals and 2 snacks; 3M+3S: 3 meals and 3 snacks; 10S: Grazing diet – 100kcal every 2-3 hours; HCB: High Calorie Breakfast; HCD: High Calorie Dinner; ED: Early Dinner; LD: Late Dinner; FL: Front Loading; EED: Equal Energy Distribution; HCB: High Calorie Breakfast; ML: Middle Loading; BL: Back Loading.

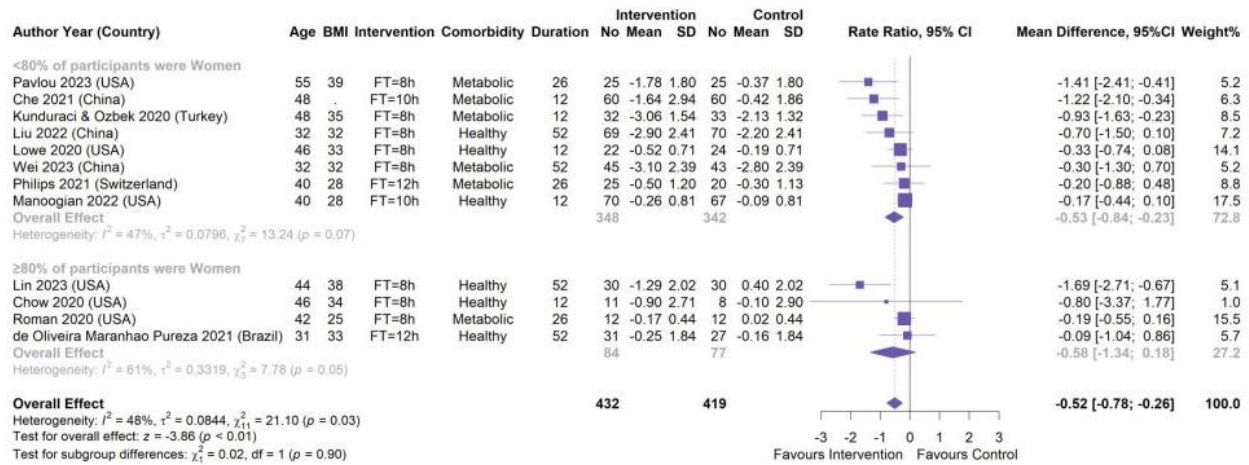

**eFigure 89: Meta-analysis of difference in mean difference (95% CIs) for the effect of time restricted eating on BMI (kg/m<sup>2</sup>), grouped by gender proportion**

BMI: Body Mass Index; SD: Standard Deviation; CI: Confidence Interval; USA: United States of America; FT: Feeding Time; Duration: follow-up duration in weeks; 2M/3M/6M: 2, 3 or 6 meals; 3M+2S: 3 meals and 2 snacks; 3M+3S: 3 meals and 3 snacks; 10S: Grazing diet – 100kcal every 2-3 hours; HCB: High Calorie Breakfast; HCD: High Calorie Dinner; ED: Early Dinner; LD: Late Dinner; FL: Front Loading; EED: Equal Energy Distribution; ML: Middle Loading; BL: Back Loading.

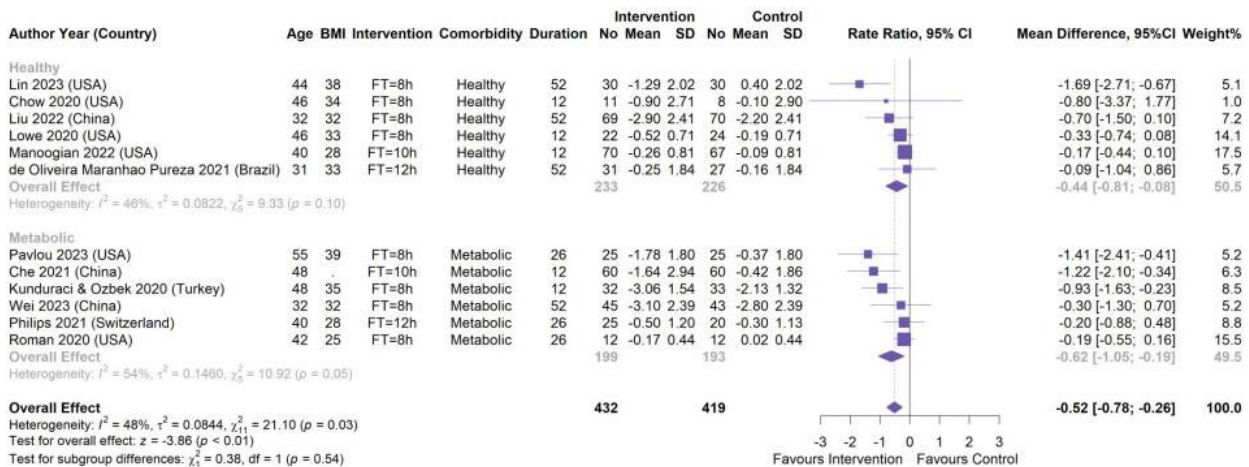

**eFigure 90: Meta-analysis of difference in mean difference (95% CIs) for the effect of time restricted eating on BMI (kg/m<sup>2</sup>), grouped by health status**

BMI: Body Mass Index; SD: Standard Deviation; CI: Confidence Interval; USA: United States of America; FT: Feeding Time; Duration: follow-up duration in weeks; 2M/3M/6M: 2, 3 or 6 meals; 3M+2S: 3 meals and 2 snacks; 3M+3S: 3 meals and 3 snacks; 10S: Grazing diet – 100kcal every 2-3 hours; HCB: High Calorie Breakfast; HCD: High Calorie Dinner; ED: Early Dinner; LD: Late Dinner; FL: Front Loading; EED: Equal Energy Distribution; ML: Middle Loading; BL: Back Loading.



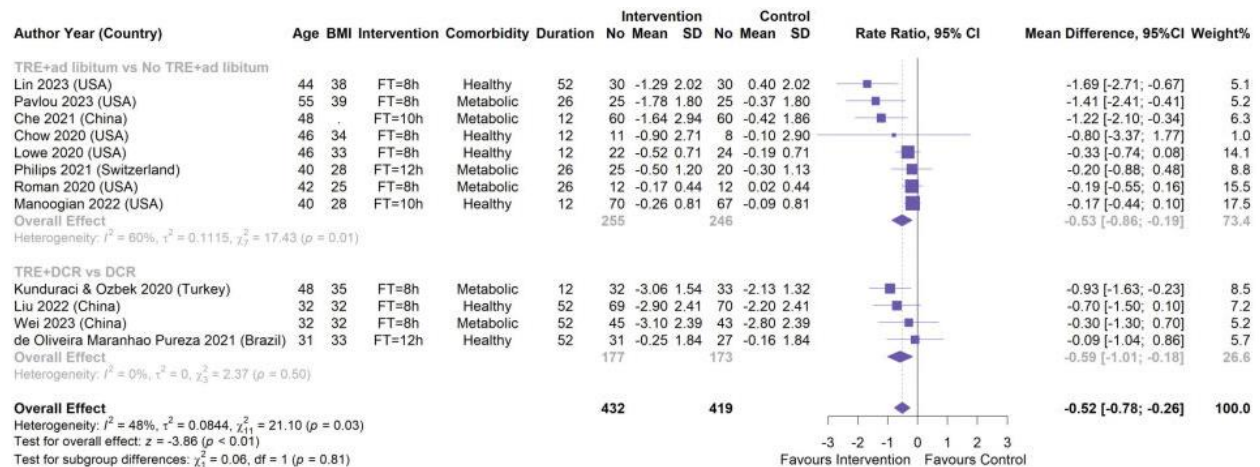

**eFigure 91: Meta-analysis of difference in mean difference (95% CIs) for the effect of time restricted eating on BMI (kg/m<sup>2</sup>), grouped by energy prescription**

BMI: Body Mass Index; SD: Standard Deviation; CI: Confidence Interval; USA: United States of America; FT: Feeding Time; Duration: follow-up duration in weeks; 2M/3M/6M: 2, 3 or 6 meals; 3M+2S: 3 meals and 2 snacks; 3M+3S: 3 meals and 3 snacks; 10S: Grazing diet – 100kcal every 2-3 hours; HCB: High Calorie Breakfast; HCD: High Calorie Dinner; ED: Early Dinner; LD: Late Dinner; FL: Front Loading; EED: Equal Energy Distribution; ML: Middle Loading; BL: Back Loading.

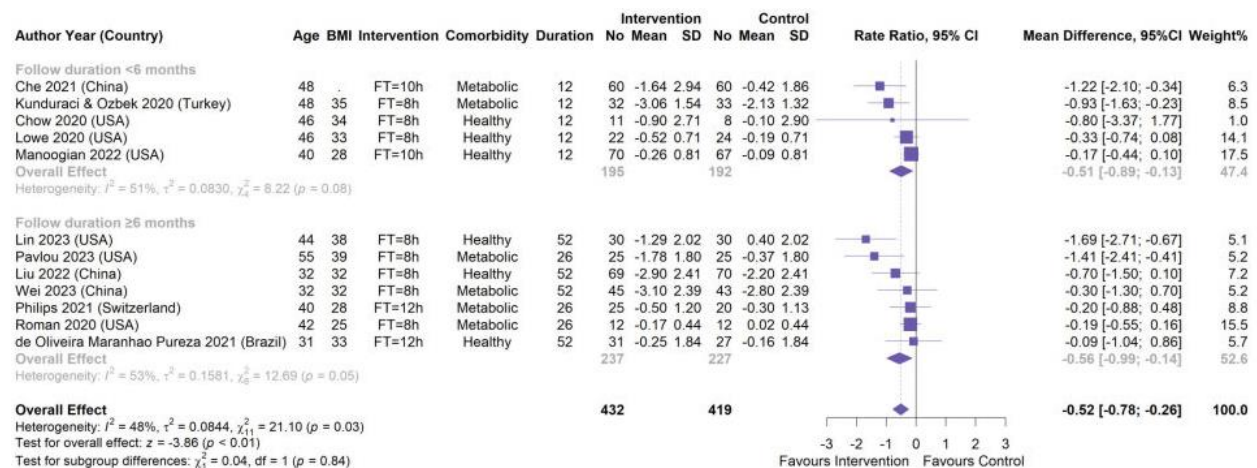

**eFigure 92: Meta-analysis of difference in mean difference (95% CIs) for the effect of time restricted eating on BMI (kg/m<sup>2</sup>), grouped by follow duration**

BMI: Body Mass Index; SD: Standard Deviation; CI: Confidence Interval; USA: United States of America; FT: Feeding Time; Duration: follow-up duration in weeks; 2M/3M/6M: 2, 3 or 6 meals; 3M+2S: 3 meals and 2 snacks; 3M+3S: 3 meals and 3 snacks; 10S: Grazing diet – 100kcal every 2-3 hours; HCB: High Calorie Breakfast; HCD: High Calorie Dinner; ED: Early Dinner; LD: Late Dinner; FL: Front Loading; EED: Equal Energy Distribution; ML: Middle Loading; BL: Back Loading.

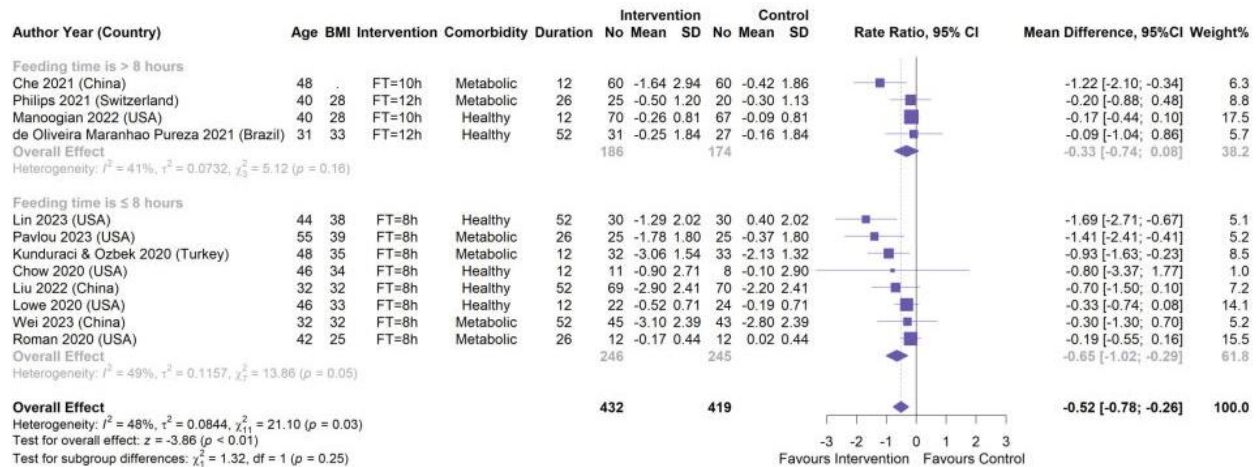

**eFigure 93: Meta-analysis of difference in mean difference (95% CIs) for the effect of time restricted eating on BMI (kg/m<sup>2</sup>), grouped by eating window**

BMI: Body Mass Index; SD: Standard Deviation; CI: Confidence Interval; USA: United States of America; FT: Feeding Time; Duration: follow-up duration in weeks; 2M/3M/6M: 2, 3 or 6 meals; 3M+2S: 3 meals and 2 snacks; 3M+3S: 3 meals and 3 snacks; 10S: Grazing diet – 100kcal every 2-3 hours; HCB: High Calorie Breakfast; HCD: High Calorie Dinner; ED: Early Dinner; LD: Late Dinner; FL: Front Loading; EED: Equal Energy Distribution; ML: Middle Loading; BL: Back Loading.

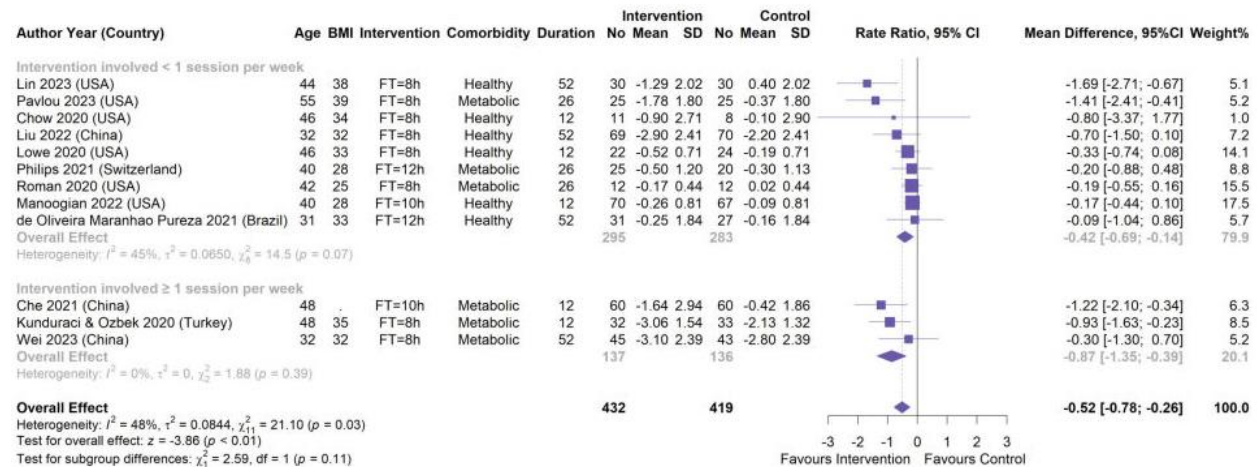

**eFigure 94: Meta-analysis of difference in mean difference (95% CIs) for the effect of time restricted eating on BMI (kg/m<sup>2</sup>), grouped by frequency of contact**

BMI: Body Mass Index; SD: Standard Deviation; CI: Confidence Interval; USA: United States of America; FT: Feeding Time; Duration: follow-up duration in weeks; 2M/3M/6M: 2, 3 or 6 meals; 3M+2S: 3 meals and 2 snacks; 3M+3S: 3 meals and 3 snacks; 10S: Grazing diet – 100kcal every 2-3 hours; HCB: High Calorie Breakfast; HCD: High Calorie Dinner; ED: Early Dinner; LD: Late Dinner; FL: Front Loading; EED: Equal Energy Distribution; ML: Middle Loading; BL: Back Loading.

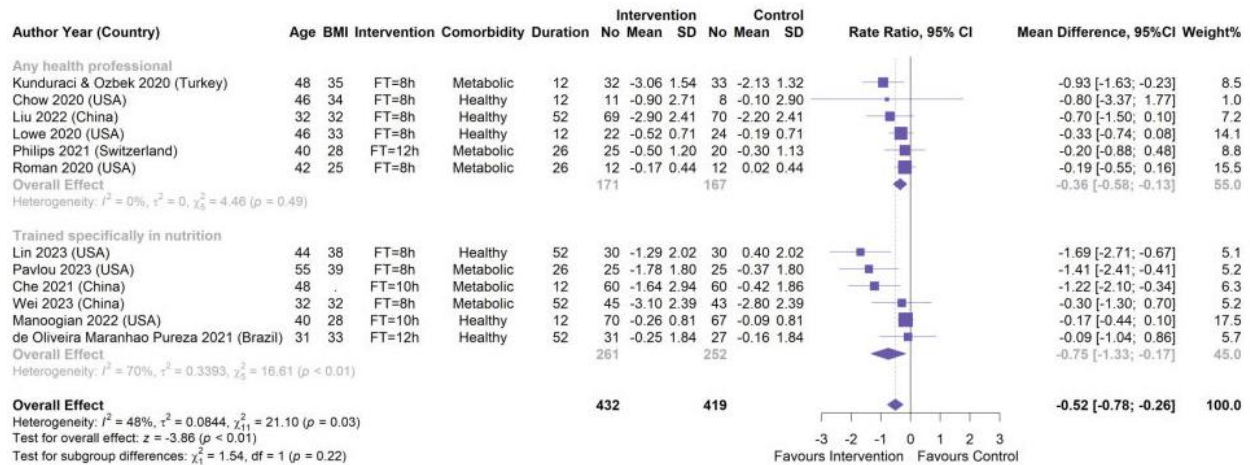

**eFigure 95: Meta-analysis of difference in mean difference (95% CIs) for the effect of time restricted eating on BMI (kg/m<sup>2</sup>), grouped by delivery personnel**

BMI: Body Mass Index; SD: Standard Deviation; CI: Confidence Interval; USA: United States of America; FT: Feeding Time; Duration: follow-up duration in weeks; 2M/3M/6M: 2, 3 or 6 meals; 3M+2S: 3 meals and 2 snacks; 3M+3S: 3 meals and 3 snacks; 10S: Grazing diet – 100kcal every 2-3 hours; HCB: High Calorie Breakfast; HCD: High Calorie Dinner; ED: Early Dinner; LD: Late Dinner; FL: Front Loading; EED: Equal Energy Distribution; ML: Middle Loading; BL: Back Loading.

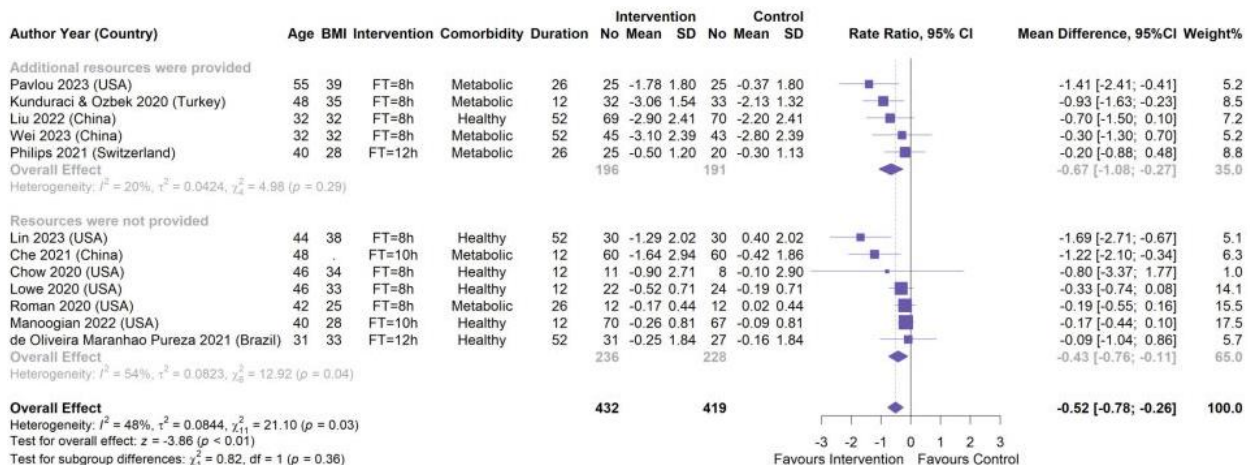

**eFigure 96: Meta-analysis of difference in mean difference (95% CIs) for the effect of time restricted eating on BMI (kg/m<sup>2</sup>), grouped by resource provision**

BMI: Body Mass Index; SD: Standard Deviation; CI: Confidence Interval; USA: United States of America; FT: Feeding Time; Duration: follow-up duration in weeks; 2M/3M/6M: 2, 3 or 6 meals; 3M+2S: 3 meals and 2 snacks; 3M+3S: 3 meals and 3 snacks; 10S: Grazing diet – 100kcal every 2-3 hours; HCB: High Calorie Breakfast; HCD: High Calorie Dinner; ED: Early Dinner; LD: Late Dinner; FL: Front Loading; EED: Equal Energy Distribution; ML: Middle Loading; BL: Back Loading.

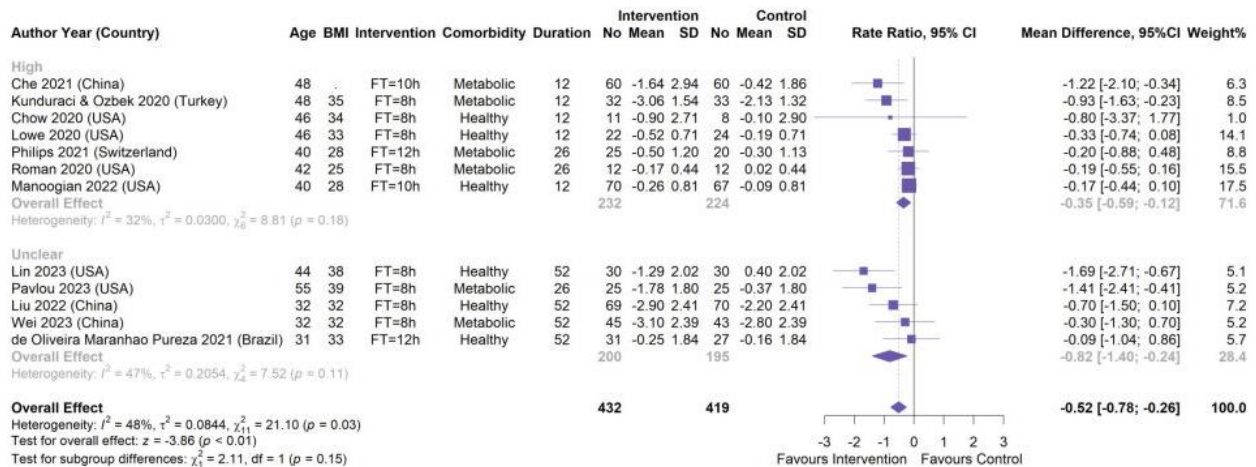

**eFigure 97: Meta-analysis of difference in mean difference (95% CIs) for the effect of time restricted eating on BMI (kg/m<sup>2</sup>), grouped by risk of bias**

BMI: Body Mass Index; SD: Standard Deviation; CI: Confidence Interval; USA: United States of America; FT: Feeding Time; Duration: follow-up duration in weeks; 2M/3M/6M: 2, 3 or 6 meals; 3M+2S: 3 meals and 2 snacks; 3M+3S: 3 meals and 3 snacks; 10S: Grazing diet – 100kcal every 2-3 hours; HCB: High Calorie Breakfast; HCD: High Calorie Dinner; ED: Early Dinner; LD: Late Dinner; FL: Front Loading; EED: Equal Energy Distribution; ML: Middle Loading; BL: Back Loading.

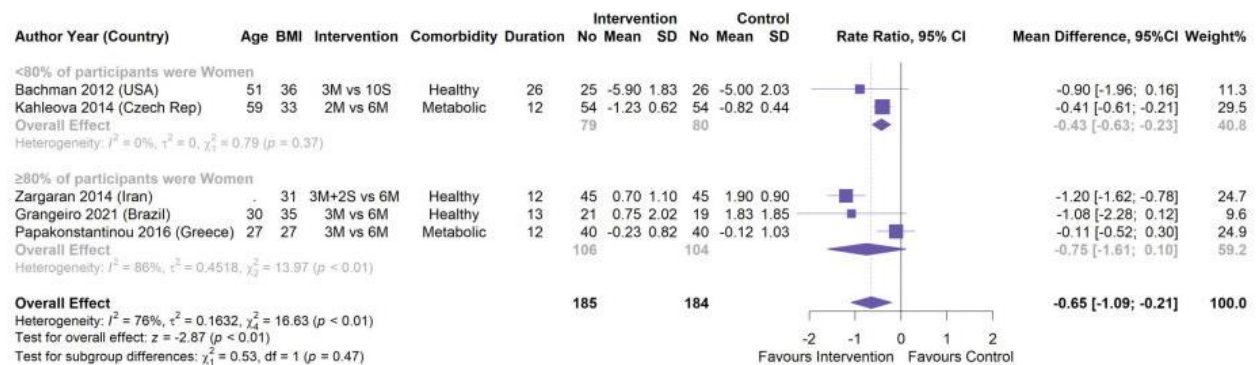

**eFigure 98: Meta-analysis of difference in mean difference (95% CIs) for the effect of meal frequency on BMI (kg/m<sup>2</sup>), grouped by gender proportion**

BMI: Body Mass Index; SD: Standard Deviation; CI: Confidence Interval; USA: United States of America; FT: Feeding Time; Duration: follow-up duration in weeks; 2M/3M/6M: 2, 3 or 6 meals; 3M+2S: 3 meals and 2 snacks; 3M+3S: 3 meals and 3 snacks; 10S: Grazing diet – 100kcal every 2-3 hours; HCB: High Calorie Breakfast; HCD: High Calorie Dinner; ED: Early Dinner; LD: Late Dinner; FL: Front Loading; EED: Equal Energy Distribution; ML: Middle Loading; BL: Back Loading.

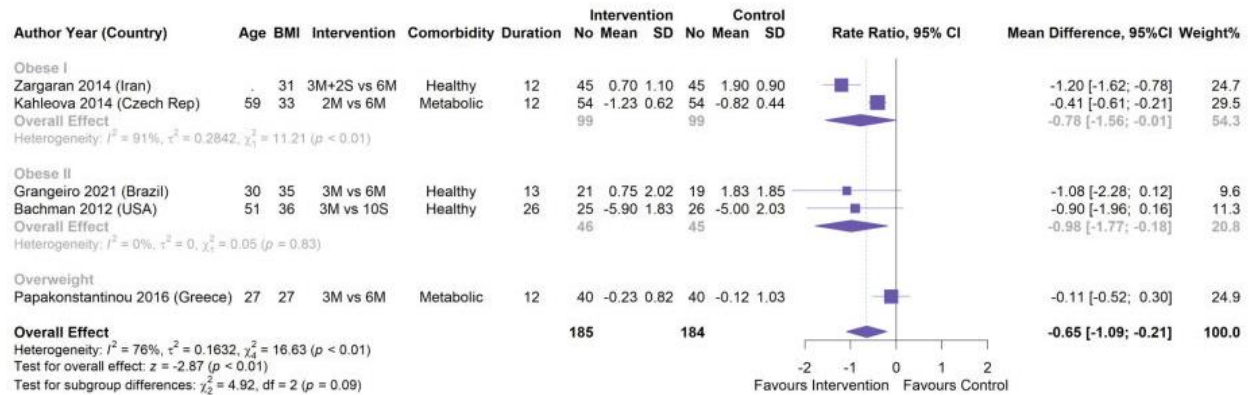

**eFigure 99: Meta-analysis of difference in mean difference (95% CIs) for the effect of meal frequency on BMI (kg/m<sup>2</sup>), grouped by baseline BMI status**

BMI: Body Mass Index; SD: Standard Deviation; CI: Confidence Interval; USA: United States of America; FT: Feeding Time; Duration: follow-up duration in weeks; 2M/3M/6M: 2, 3 or 6 meals; 3M+2S: 3 meals and 2 snacks; 3M+3S: 3 meals and 3 snacks; 10S: Grazing diet – 100kcal every 2-3 hours; HCB: High Calorie Breakfast; HCD: High Calorie Dinner; ED: Early Dinner; LD: Late Dinner; FL: Front Loading; EED: Equal Energy Distribution; ML: Middle Loading; BL: Back Loading.

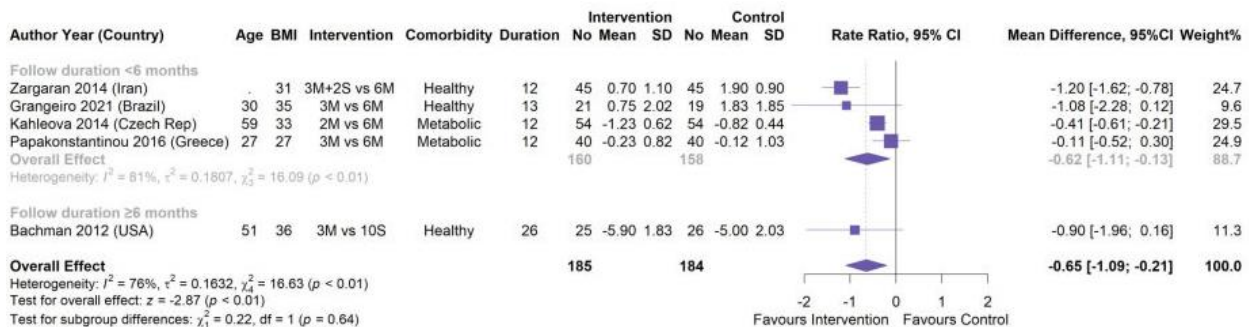

**eFigure 100: Meta-analysis of difference in mean difference (95% CIs) for the effect of meal frequency on BMI (kg/m<sup>2</sup>), grouped by follow duration**

BMI: Body Mass Index; SD: Standard Deviation; CI: Confidence Interval; USA: United States of America; FT: Feeding Time; Duration: follow-up duration in weeks; 2M/3M/6M: 2, 3 or 6 meals; 3M+2S: 3 meals and 2 snacks; 3M+3S: 3 meals and 3 snacks; 10S: Grazing diet – 100kcal every 2-3 hours; HCB: High Calorie Breakfast; HCD: High Calorie Dinner; ED: Early Dinner; LD: Late Dinner; FL: Front Loading; EED: Equal Energy Distribution; ML: Middle Loading; BL: Back Loading.

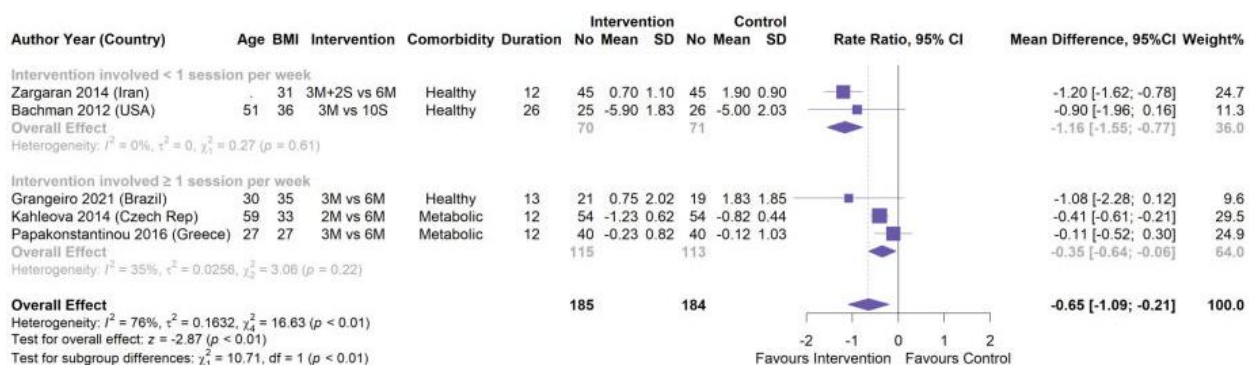

**eFigure 101: Meta-analysis of difference in mean difference (95% CIs) for the effect of meal frequency on BMI (kg/m<sup>2</sup>), grouped by frequency of contact**

BMI: Body Mass Index; SD: Standard Deviation; CI: Confidence Interval; USA: United States of America; FT: Feeding Time; Duration: follow-up duration in weeks; 2M/3M/6M: 2, 3 or 6 meals; 3M+2S: 3 meals and 2 snacks; 3M+3S: 3 meals and 3 snacks; 10S: Grazing diet

- 100kcal every 2-3 hours; HCB: High Calorie Breakfast; HCD: High Calorie Dinner; ED: Early Dinner; LD: Late Dinner; FL: Front Loading; EED: Equal Energy Distribution; ML: Middle Loading; BL: Back Loading.

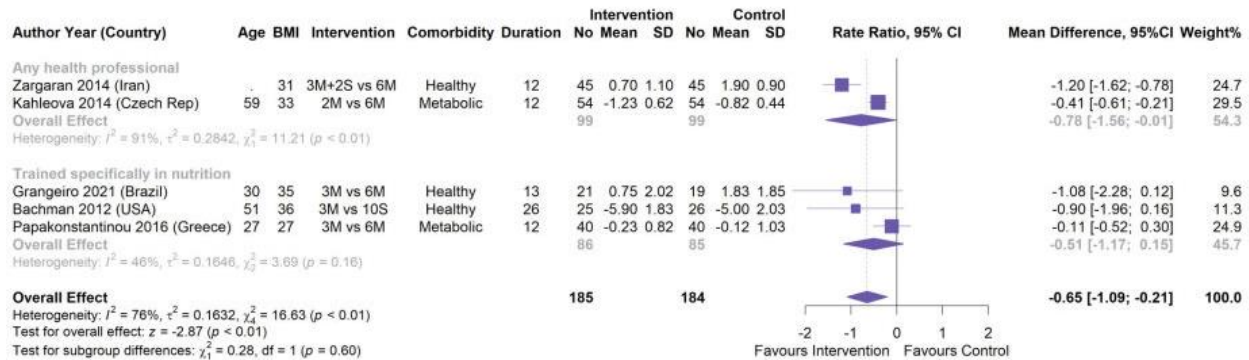

**eFigure 102: Meta-analysis of difference in mean difference (95% CIs) for the effect of meal frequency on BMI (kg/m<sup>2</sup>), grouped by delivery personnel**

BMI: Body Mass Index; SD: Standard Deviation; CI: Confidence Interval; USA: United States of America; FT: Feeding Time; Duration: follow-up duration in weeks; 2M/3M/6M: 2, 3 or 6 meals; 3M+2S: 3 meals and 2 snacks; 3M+3S: 3 meals and 3 snacks; 10S: Grazing diet - 100kcal every 2-3 hours; HCB: High Calorie Breakfast; HCD: High Calorie Dinner; ED: Early Dinner; LD: Late Dinner; FL: Front Loading; EED: Equal Energy Distribution; ML: Middle Loading; BL: Back Loading.

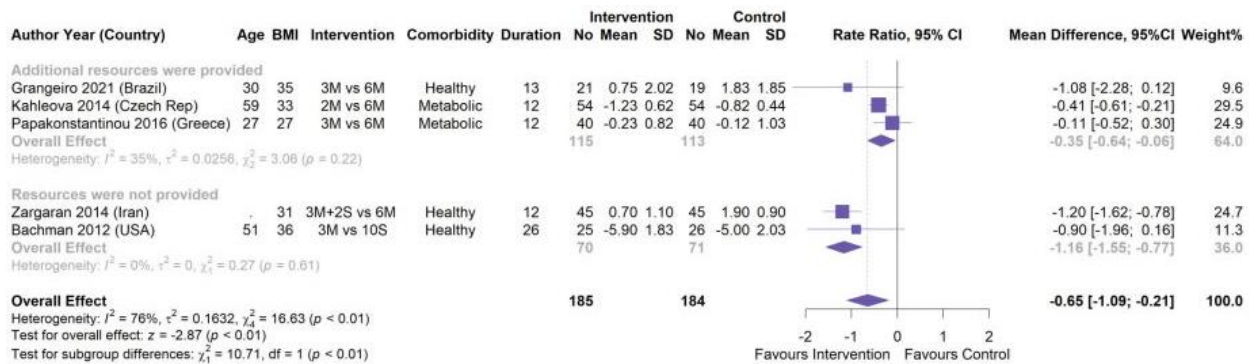

**eFigure 103: Meta-analysis of difference in mean difference (95% CIs) for the effect of meal frequency on BMI (kg/m<sup>2</sup>), grouped by resource provision**

BMI: Body Mass Index; SD: Standard Deviation; CI: Confidence Interval; USA: United States of America; FT: Feeding Time; Duration: follow-up duration in weeks; 2M/3M/6M: 2, 3 or 6 meals; 3M+2S: 3 meals and 2 snacks; 3M+3S: 3 meals and 3 snacks; 10S: Grazing diet - 100kcal every 2-3 hours; HCB: High Calorie Breakfast; HCD: High Calorie Dinner; ED: Early Dinner; LD: Late Dinner; FL: Front Loading; EED: Equal Energy Distribution; ML: Middle Loading; BL: Back Loading.

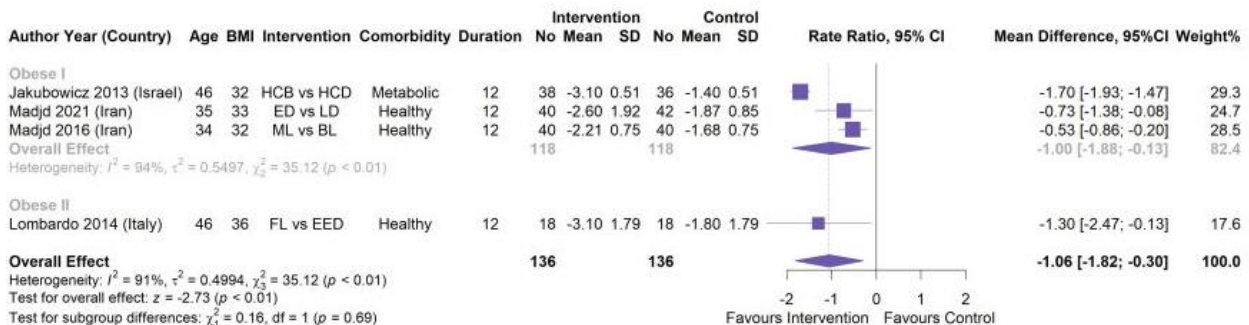

**eFigure 104: Meta-analysis of difference in mean difference (95% CIs) for the effect of meal distribution on BMI (kg/m<sup>2</sup>), grouped by baseline BMI status**

BMI: Body Mass Index; SD: Standard Deviation; CI: Confidence Interval; USA: United States of America; FT: Feeding Time; Duration: follow-up duration in weeks; 2M/3M/6M: 2, 3 or 6 meals; 3M+2S: 3 meals and 2 snacks; 3M+3S: 3 meals and 3 snacks; 10S: Grazing diet – 100kcal every 2-3 hours; HCB: High Calorie Breakfast; HCD: High Calorie Dinner; ED: Early Dinner; LD: Late Dinner; FL: Front Loading; EED: Equal Energy Distribution; ML: Middle Loading; BL: Back Loading.

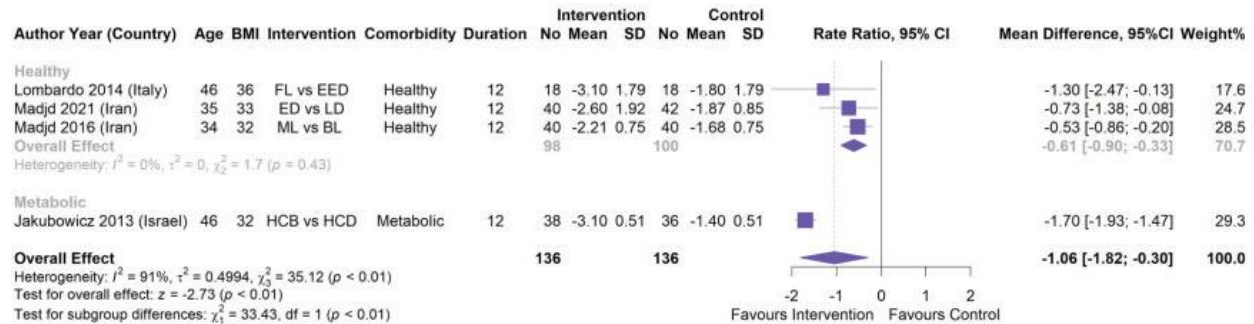

**eFigure 105: Meta-analysis of difference in mean difference (95% CIs) for the effect of meal distribution on BMI (kg/m<sup>2</sup>), grouped by health status**

BMI: Body Mass Index; SD: Standard Deviation; CI: Confidence Interval; USA: United States of America; FT: Feeding Time; Duration: follow-up duration in weeks; 2M/3M/6M: 2, 3 or 6 meals; 3M+2S: 3 meals and 2 snacks; 3M+3S: 3 meals and 3 snacks; 10S: Grazing diet – 100kcal every 2-3 hours; HCB: High Calorie Breakfast; HCD: High Calorie Dinner; ED: Early Dinner; LD: Late Dinner; FL: Front Loading; EED: Equal Energy Distribution; ML: Middle Loading; BL: Back Loading.

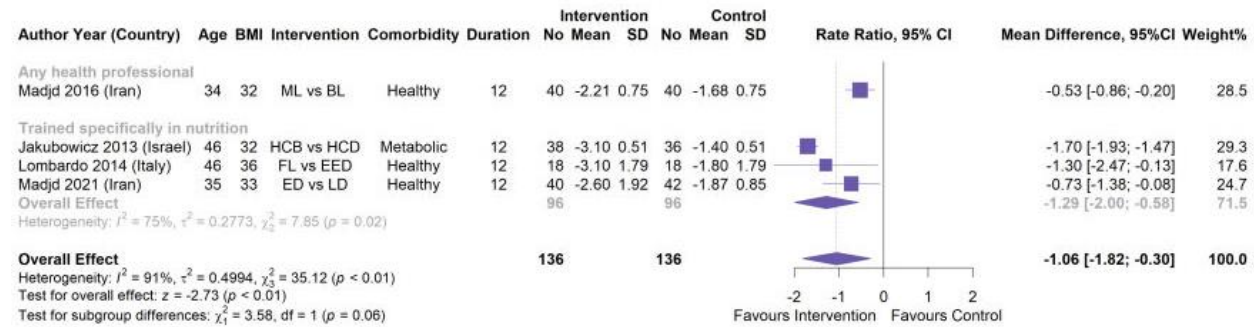

**eFigure 106: Meta-analysis of difference in mean difference (95% CIs) for the effect of meal distribution on BMI (kg/m<sup>2</sup>), grouped by delivery personnel**

BMI: Body Mass Index; SD: Standard Deviation; CI: Confidence Interval; USA: United States of America; FT: Feeding Time; Duration: follow-up duration in weeks; 2M/3M/6M: 2, 3 or 6 meals; 3M+2S: 3 meals and 2 snacks; 3M+3S: 3 meals and 3 snacks; 10S: Grazing diet – 100kcal every 2-3 hours; HCB: High Calorie Breakfast; HCD: High Calorie Dinner; ED: Early Dinner; LD: Late Dinner; FL: Front Loading; EED: Equal Energy Distribution; ML: Middle Loading; BL: Back Loading.

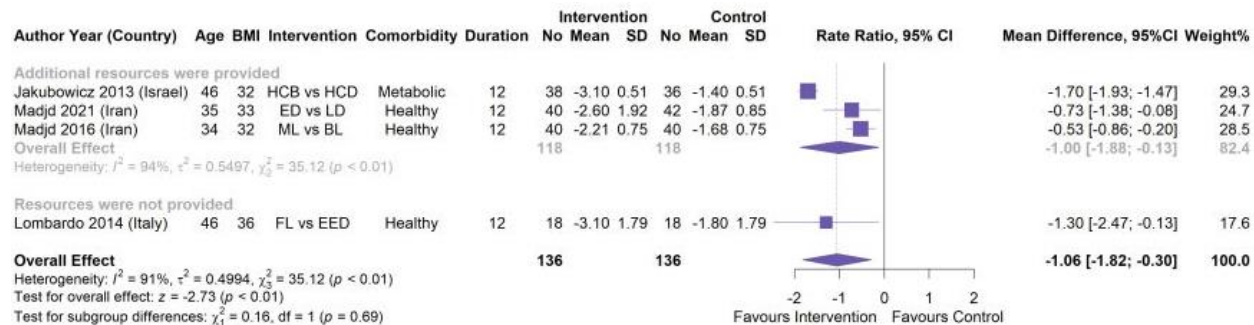

**eFigure 107: Meta-analysis of difference in mean difference (95% CIs) for the effect of meal distribution on BMI (kg/m<sup>2</sup>), grouped by resource provision**

BMI: Body Mass Index; SD: Standard Deviation; CI: Confidence Interval; USA: United States of America; FT: Feeding Time; Duration: follow-up duration in weeks; 2M/3M/6M: 2, 3 or 6 meals; 3M+2S: 3 meals and 2 snacks; 3M+3S: 3 meals and 3 snacks; 10S: Grazing diet – 100kcal every 2-3 hours; HCB: High Calorie Breakfast; HCD: High Calorie Dinner; ED: Early Dinner; LD: Late Dinner; FL: Front Loading; EED: Equal Energy Distribution; ML: Middle Loading; BL: Back Loading.

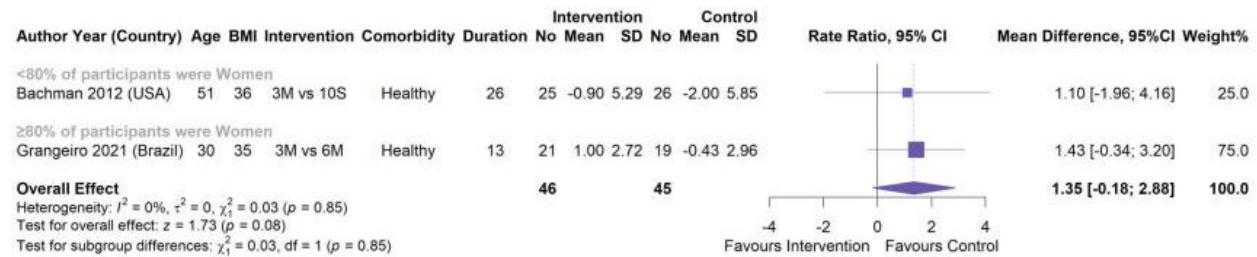

**eFigure 108: Meta-analysis of difference in mean difference (95% CIs) for the effect of meal frequency on lean mass (kg), grouped by gender proportion**

BMI: Body Mass Index; SD: Standard Deviation; CI: Confidence Interval; USA: United States of America; FT: Feeding Time; Duration: follow-up duration in weeks; 2M/3M/6M: 2, 3 or 6 meals; 3M+2S: 3 meals and 2 snacks; 3M+3S: 3 meals and 3 snacks; 10S: Grazing diet – 100kcal every 2-3 hours; HCB: High Calorie Breakfast; HCD: High Calorie Dinner; ED: Early Dinner; LD: Late Dinner; FL: Front Loading; EED: Equal Energy Distribution; ML: Middle Loading; BL: Back Loading.

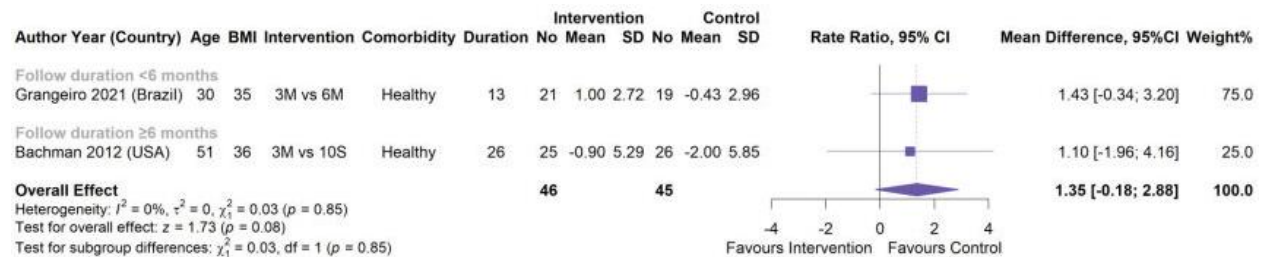

**eFigure 109: Meta-analysis of difference in mean difference (95% CIs) for the effect of meal frequency on lean mass (kg), grouped by follow duration**

BMI: Body Mass Index; SD: Standard Deviation; CI: Confidence Interval; USA: United States of America; FT: Feeding Time; Duration: follow-up duration in weeks; 2M/3M/6M: 2, 3 or 6 meals; 3M+2S: 3 meals and 2 snacks; 3M+3S: 3 meals and 3 snacks; 10S: Grazing diet – 100kcal every 2-3 hours; HCB: High Calorie Breakfast; HCD: High Calorie Dinner; ED: Early Dinner; LD: Late Dinner; FL: Front Loading; EED: Equal Energy Distribution; ML: Middle Loading; BL: Back Loading.

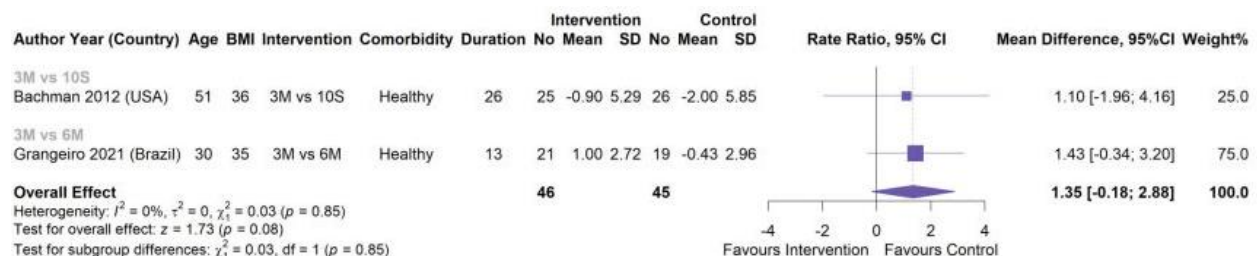

**eFigure 110: Meta-analysis of difference in mean difference (95% CIs) for the effect of meal frequency on lean mass (kg), grouped by intervention intensity**

BMI: Body Mass Index; SD: Standard Deviation; CI: Confidence Interval; USA: United States of America; FT: Feeding Time; Duration: follow-up duration in weeks; 2M/3M/6M: 2, 3 or 6 meals; 3M+2S: 3 meals and 2 snacks; 3M+3S: 3 meals and 3 snacks; 10S: Grazing diet – 100kcal every 2-3 hours; HCB: High Calorie Breakfast; HCD: High Calorie Dinner; ED: Early Dinner; LD: Late Dinner; FL: Front Loading; EED: Equal Energy Distribution; ML: Middle Loading; BL: Back Loading.



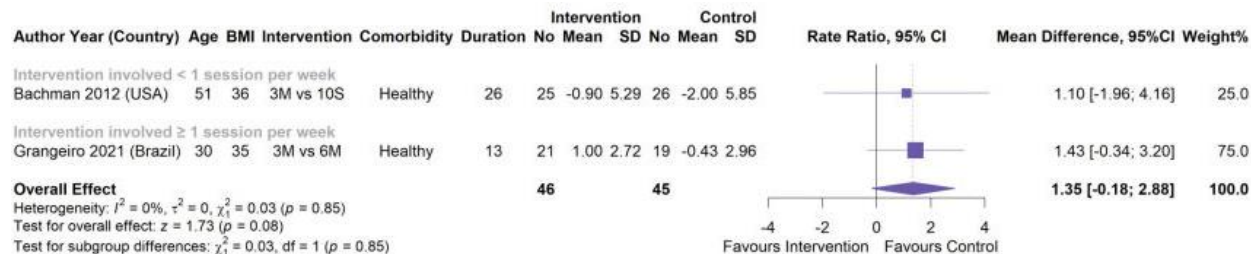

**eFigure 111: Meta-analysis of difference in mean difference (95% CIs) for the effect of meal frequency on lean mass (kg), grouped by frequency of contact**

BMI: Body Mass Index; SD: Standard Deviation; CI: Confidence Interval; USA: United States of America; FT: Feeding Time; Duration: follow-up duration in weeks; 2M/3M/6M: 2, 3 or 6 meals; 3M+2S: 3 meals and 2 snacks; 3M+3S: 3 meals and 3 snacks; 10S: Grazing diet – 100kcal every 2-3 hours; HCB: High Calorie Breakfast; HCD: High Calorie Dinner; ED: Early Dinner; LD: Late Dinner; FL: Front Loading; EED: Equal Energy Distribution; ML: Middle Loading; BL: Back Loading.

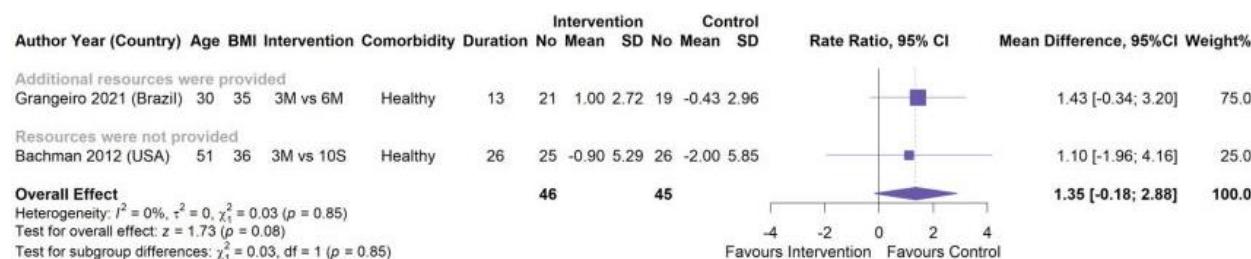

**eFigure 112: Meta-analysis of difference in mean difference (95% CIs) for the effect of meal frequency on lean mass (kg), grouped by resource provision**

BMI: Body Mass Index; SD: Standard Deviation; CI: Confidence Interval; USA: United States of America; FT: Feeding Time; Duration: follow-up duration in weeks; 2M/3M/6M: 2, 3 or 6 meals; 3M+2S: 3 meals and 2 snacks; 3M+3S: 3 meals and 3 snacks; 10S: Grazing diet – 100kcal every 2-3 hours; HCB: High Calorie Breakfast; HCD: High Calorie Dinner; ED: Early Dinner; LD: Late Dinner; FL: Front Loading; EED: Equal Energy Distribution; ML: Middle Loading; BL: Back Loading.

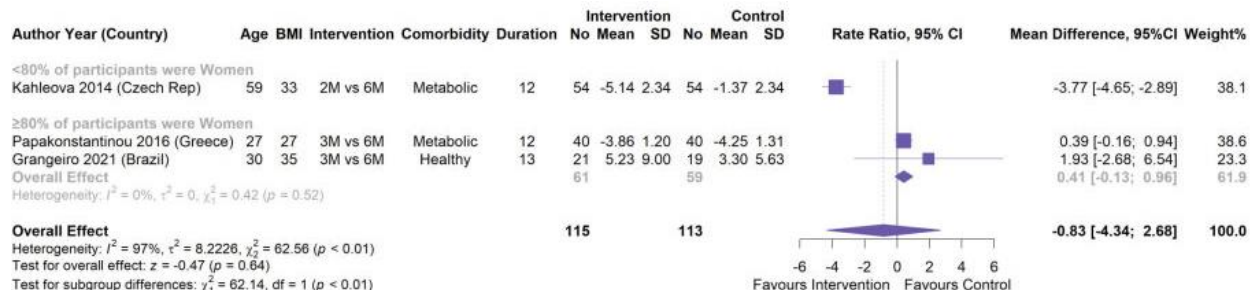

**eFigure 113: Meta-analysis of difference in mean difference (95% CIs) for the effect of meal frequency on waist circumference (cm), grouped by gender proportion**

BMI: Body Mass Index; SD: Standard Deviation; CI: Confidence Interval; USA: United States of America; FT: Feeding Time; Duration: follow-up duration in weeks; 2M/3M/6M: 2, 3 or 6 meals; 3M+2S: 3 meals and 2 snacks; 3M+3S: 3 meals and 3 snacks; 10S: Grazing diet – 100kcal every 2-3 hours; HCB: High Calorie Breakfast; HCD: High Calorie Dinner; ED: Early Dinner; LD: Late Dinner; FL: Front Loading; EED: Equal Energy Distribution; ML: Middle Loading; BL: Back Loading.

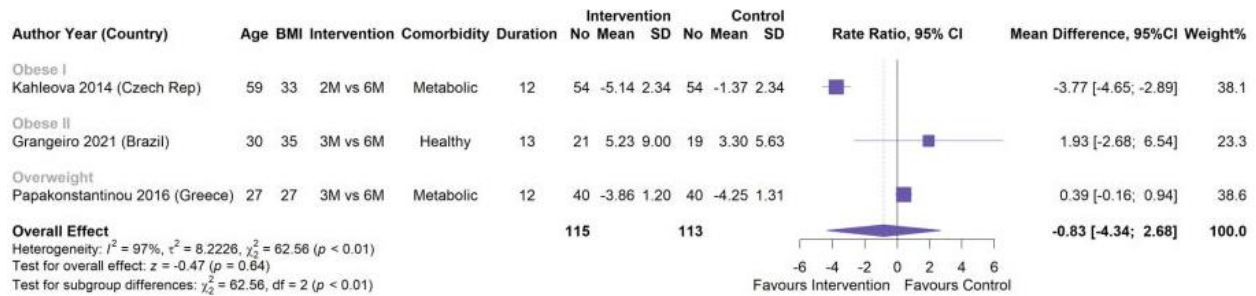

**eFigure 114: Meta-analysis of difference in mean difference (95% CIs) for the effect of meal frequency on waist circumference (cm), grouped by baseline BMI status**

BMI: Body Mass Index; SD: Standard Deviation; CI: Confidence Interval; USA: United States of America; FT: Feeding Time; Duration: follow-up duration in weeks; 2M/3M/6M: 2, 3 or 6 meals; 3M+2S: 3 meals and 2 snacks; 3M+3S: 3 meals and 3 snacks; 10S: Grazing diet – 100kcal every 2-3 hours; HCB: High Calorie Breakfast; HCD: High Calorie Dinner; ED: Early Dinner; LD: Late Dinner; FL: Front Loading; EED: Equal Energy Distribution; ML: Middle Loading; BL: Back Loading.

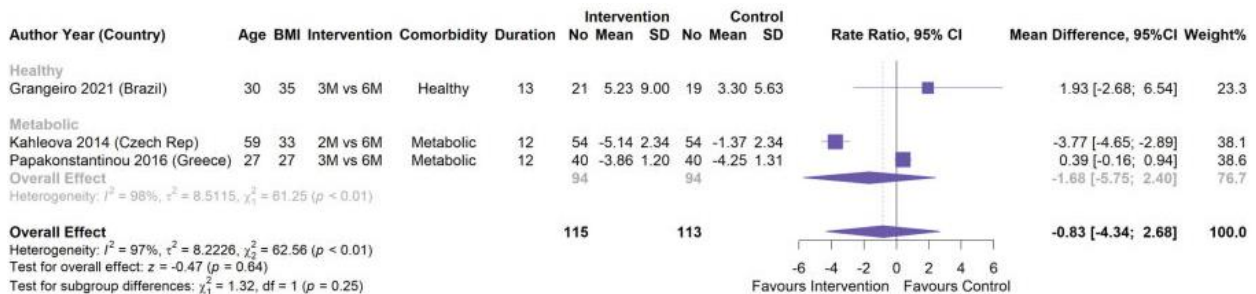

**eFigure 115: Meta-analysis of difference in mean difference (95% CIs) for the effect of meal frequency on waist circumference (cm), grouped by health status**

BMI: Body Mass Index; SD: Standard Deviation; CI: Confidence Interval; USA: United States of America; FT: Feeding Time; Duration: follow-up duration in weeks; 2M/3M/6M: 2, 3 or 6 meals; 3M+2S: 3 meals and 2 snacks; 3M+3S: 3 meals and 3 snacks; 10S: Grazing diet – 100kcal every 2-3 hours; HCB: High Calorie Breakfast; HCD: High Calorie Dinner; ED: Early Dinner; LD: Late Dinner; FL: Front Loading; EED: Equal Energy Distribution; ML: Middle Loading; BL: Back Loading.

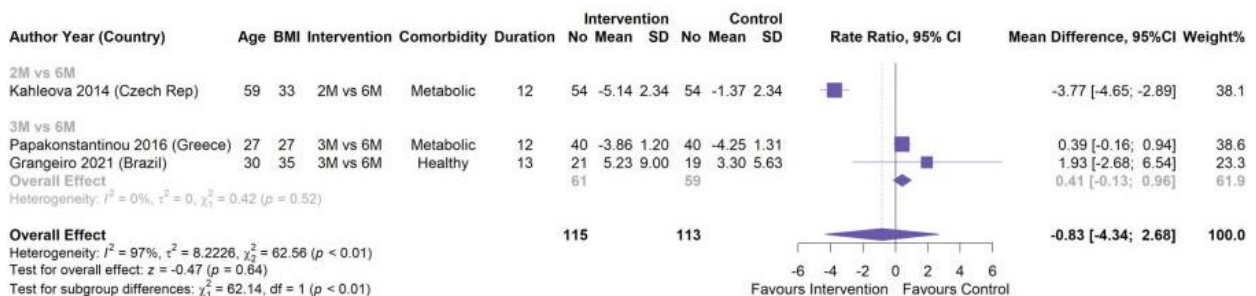

**eFigure 116: Meta-analysis of difference in mean difference (95% CIs) for the effect of meal frequency on waist circumference (cm), grouped by intervention intensity**

BMI: Body Mass Index; SD: Standard Deviation; CI: Confidence Interval; USA: United States of America; FT: Feeding Time; Duration: follow-up duration in weeks; 2M/3M/6M: 2, 3 or 6 meals; 3M+2S: 3 meals and 2 snacks; 3M+3S: 3 meals and 3 snacks; 10S: Grazing diet – 100kcal every 2-3 hours; HCB: High Calorie Breakfast; HCD: High Calorie Dinner; ED: Early Dinner; LD: Late Dinner; FL: Front Loading; EED: Equal Energy Distribution; ML: Middle Loading; BL: Back Loading.

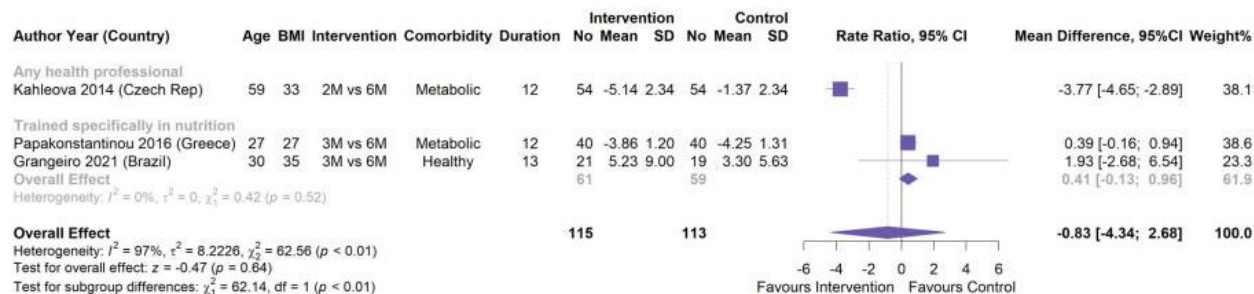

**eFigure 117: Meta-analysis of difference in mean difference (95% CIs) for the effect of meal frequency on waist circumference (cm), grouped by delivery personnel**

BMI: Body Mass Index; SD: Standard Deviation; CI: Confidence Interval; USA: United States of America; FT: Feeding Time; Duration: follow-up duration in weeks; 2M/3M/6M: 2, 3 or 6 meals; 3M+2S: 3 meals and 2 snacks; 3M+3S: 3 meals and 3 snacks; 10S: Grazing diet – 100kcal every 2-3 hours; HCB: High Calorie Breakfast; HCD: High Calorie Dinner; ED: Early Dinner; LD: Late Dinner; FL: Front Loading; EED: Equal Energy Distribution; ML: Middle Loading; BL: Back Loading.

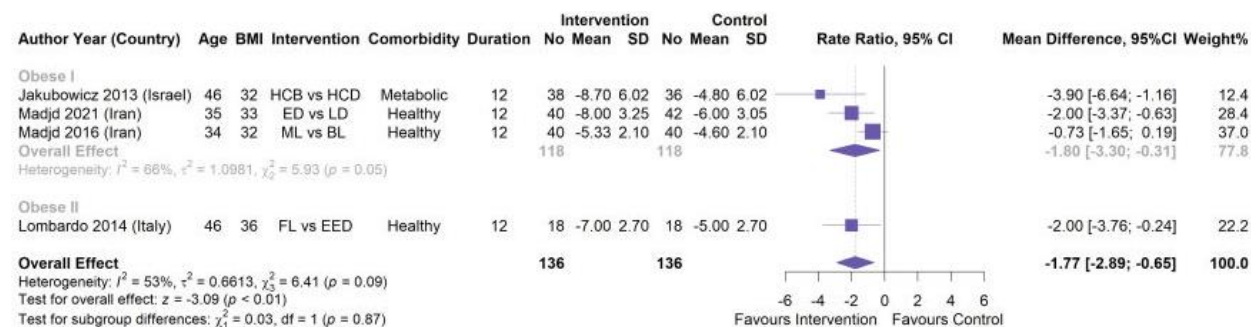

**eFigure 118: Meta-analysis of difference in mean difference (95% CIs) for the effect of meal distribution on waist circumference (cm), grouped by baseline BMI status**

BMI: Body Mass Index; SD: Standard Deviation; CI: Confidence Interval; USA: United States of America; FT: Feeding Time; Duration: follow-up duration in weeks; 2M/3M/6M: 2, 3 or 6 meals; 3M+2S: 3 meals and 2 snacks; 3M+3S: 3 meals and 3 snacks; 10S: Grazing diet – 100kcal every 2-3 hours; HCB: High Calorie Breakfast; HCD: High Calorie Dinner; ED: Early Dinner; LD: Late Dinner; FL: Front Loading; EED: Equal Energy Distribution; ML: Middle Loading; BL: Back Loading.

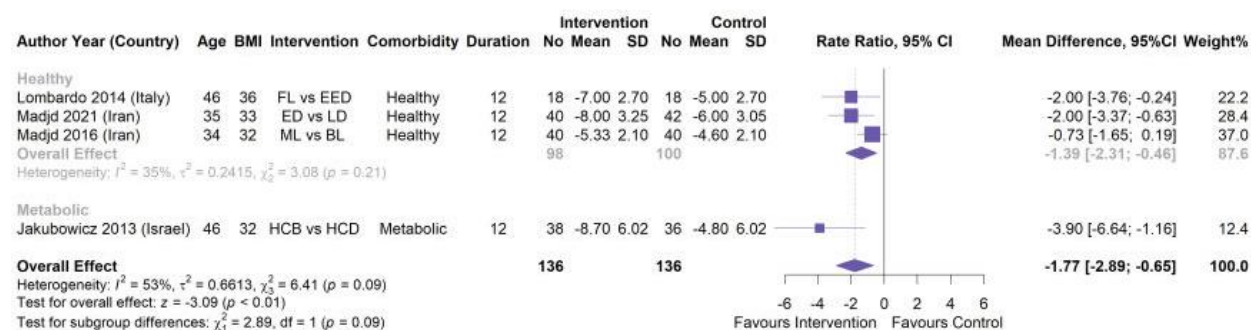

**eFigure 119: Meta-analysis of difference in mean difference (95% CIs) for the effect of meal distribution on waist circumference (cm), grouped by health status**

BMI: Body Mass Index; SD: Standard Deviation; CI: Confidence Interval; USA: United States of America; FT: Feeding Time; Duration: follow-up duration in weeks; 2M/3M/6M: 2, 3 or 6 meals; 3M+2S: 3 meals and 2 snacks; 3M+3S: 3 meals and 3 snacks; 10S: Grazing diet – 100kcal every 2-3 hours; HCB: High Calorie Breakfast; HCD: High Calorie Dinner; ED: Early Dinner; LD: Late Dinner; FL: Front Loading; EED: Equal Energy Distribution; ML: Middle Loading; BL: Back Loading.

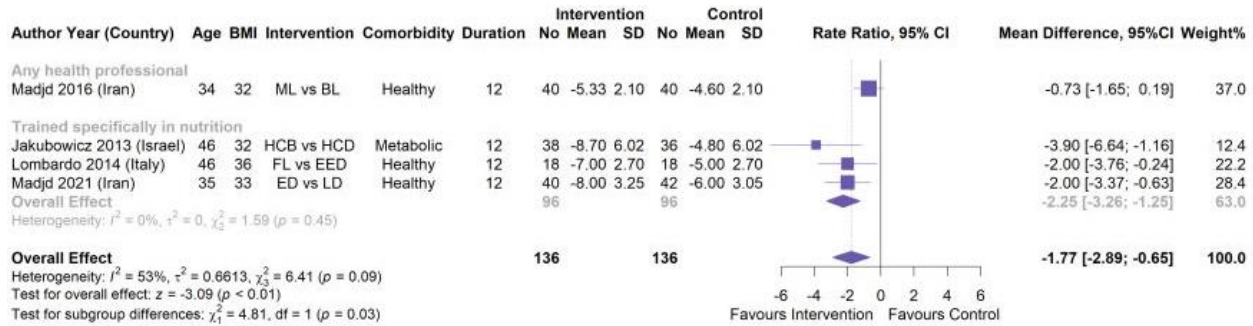

**eFigure 120: Meta-analysis of difference in mean difference (95% CIs) for the effect of meal distribution on waist circumference (cm), grouped by delivery personnel**

BMI: Body Mass Index; SD: Standard Deviation; CI: Confidence Interval; USA: United States of America; FT: Feeding Time; Duration: follow-up duration in weeks; 2M/3M/6M: 2, 3 or 6 meals; 3M+2S: 3 meals and 2 snacks; 3M+3S: 3 meals and 3 snacks; 10S: Grazing diet – 100kcal every 2-3 hours; HCB: High Calorie Breakfast; HCD: High Calorie Dinner; ED: Early Dinner; LD: Late Dinner; FL: Front Loading; EED: Equal Energy Distribution; ML: Middle Loading; BL: Back Loading.

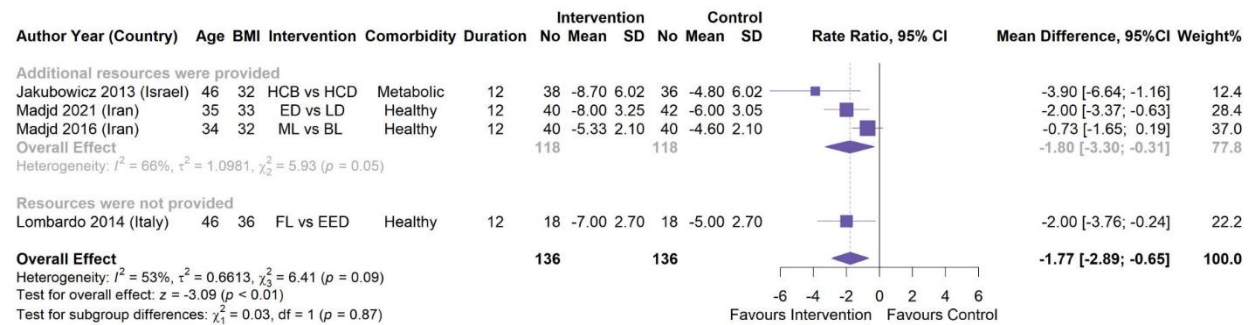

**eFigure 121: Meta-analysis of difference in mean difference (95% CIs) for the effect of meal distribution on waist circumference (cm), grouped by resource provision**

BMI: Body Mass Index; SD: Standard Deviation; CI: Confidence Interval; USA: United States of America; FT: Feeding Time; Duration: follow-up duration in weeks; 2M/3M/6M: 2, 3 or 6 meals; 3M+2S: 3 meals and 2 snacks; 3M+3S: 3 meals and 3 snacks; 10S: Grazing diet – 100kcal every 2-3 hours; HCB: High Calorie Breakfast; HCD: High Calorie Dinner; ED: Early Dinner; LD: Late Dinner; FL: Front Loading; EED: Equal Energy Distribution; ML: Middle Loading; BL: Back Loading.

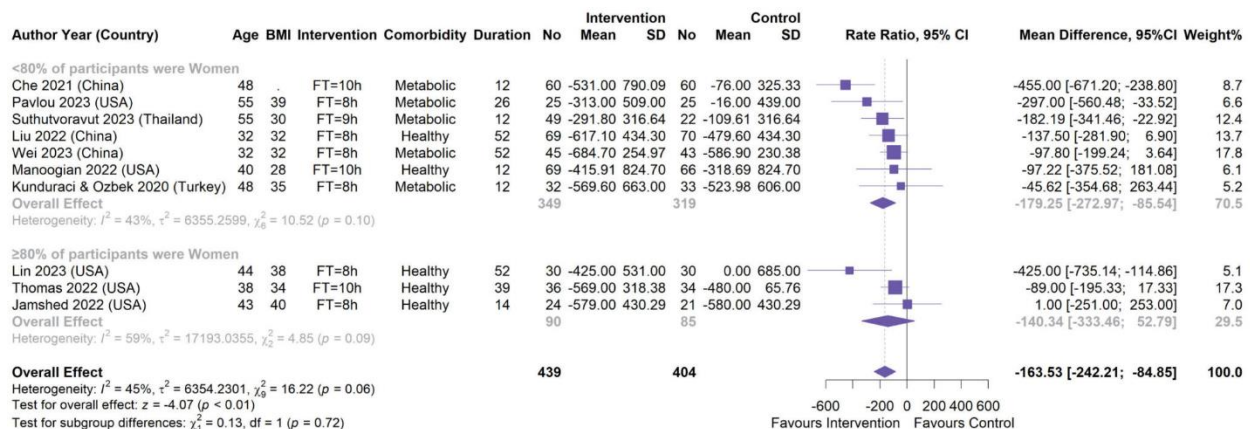

**eFigure 122: Meta-analysis of difference in mean difference (95% CIs) for the effect of time-restricted eating on energy intake (kcal/day), grouped by gender proportion**

BMI: Body Mass Index; SD: Standard Deviation; CI: Confidence Interval; USA: United States of America; FT: Feeding Time; Duration: follow-up duration in weeks; 2M/3M/6M: 2, 3 or 6 meals; 3M+2S: 3 meals and 2 snacks; 3M+3S: 3 meals and 3 snacks; 10S: Grazing diet

- 100kcal every 2-3 hours; HCB: High Calorie Breakfast; HCD: High Calorie Dinner; ED: Early Dinner; LD: Late Dinner; FL: Front Loading; EED: Equal Energy Distribution; ML: Middle Loading; BL: Back Loading.

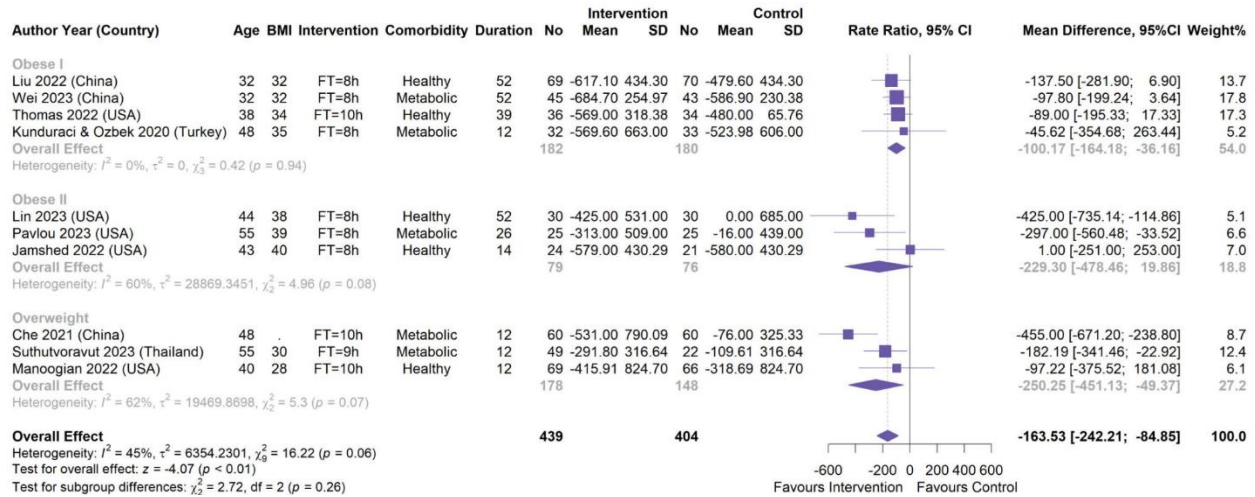

**eFigure 123: Meta-analysis of difference in mean difference (95% CIs) for the effect of time-restricted eating on energy intake (kcal/day), grouped by baseline BMI status**

BMI: Body Mass Index; SD: Standard Deviation; CI: Confidence Interval; USA: United States of America; FT: Feeding Time; Duration: follow-up duration in weeks; 2M/3M/6M: 2, 3 or 6 meals; 3M+2S: 3 meals and 2 snacks; 3M+3S: 3 meals and 3 snacks; 10S: Grazing diet - 100kcal every 2-3 hours; HCB: High Calorie Breakfast; HCD: High Calorie Dinner; ED: Early Dinner; LD: Late Dinner; FL: Front Loading; EED: Equal Energy Distribution; ML: Middle Loading; BL: Back Loading.

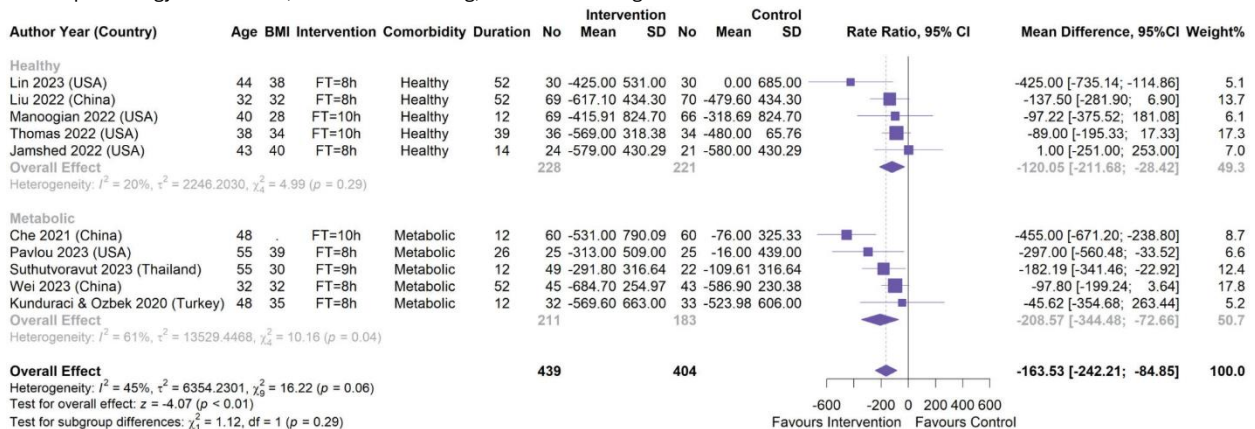

**eFigure 124: Meta-analysis of difference in mean difference (95% CIs) for the effect of time-restricted eating on energy intake (kcal/day), grouped by health status**

BMI: Body Mass Index; SD: Standard Deviation; CI: Confidence Interval; USA: United States of America; FT: Feeding Time; Duration: follow-up duration in weeks; 2M/3M/6M: 2, 3 or 6 meals; 3M+2S: 3 meals and 2 snacks; 3M+3S: 3 meals and 3 snacks; 10S: Grazing diet - 100kcal every 2-3 hours; HCB: High Calorie Breakfast; HCD: High Calorie Dinner; ED: Early Dinner; LD: Late Dinner; FL: Front Loading; EED: Equal Energy Distribution; ML: Middle Loading; BL: Back Loading.

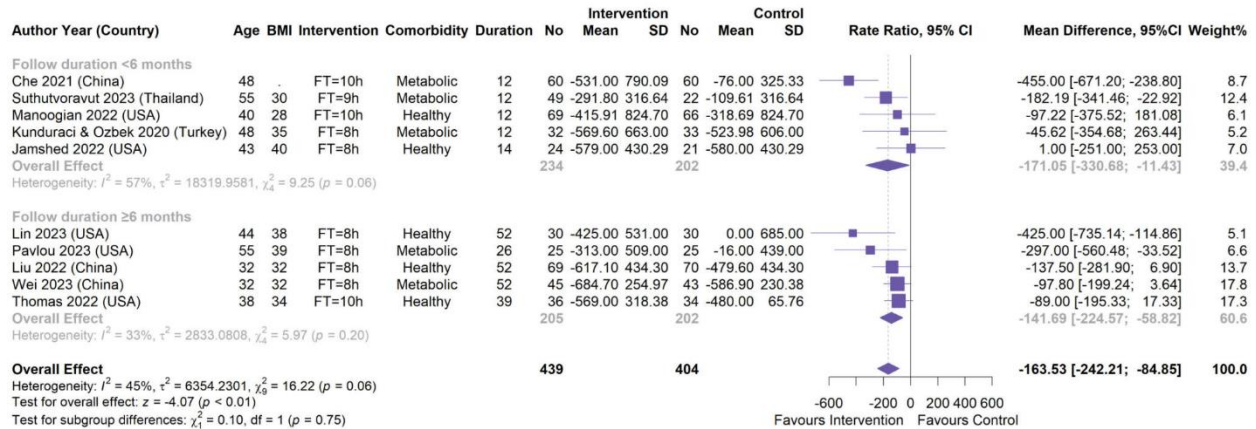

**eFigure 125: Meta-analysis of difference in mean difference (95% CIs) for the effect of time-restricted eating on energy intake (kcal/day), grouped by follow duration**

BMI: Body Mass Index; SD: Standard Deviation; CI: Confidence Interval; USA: United States of America; FT: Feeding Time; Duration: follow-up duration in weeks; 2M/3M/6M: 2, 3 or 6 meals; 3M+2S: 3 meals and 2 snacks; 3M+3S: 3 meals and 3 snacks; 10S: Grazing diet – 100kcal every 2-3 hours; HCB: High Calorie Breakfast; HCD: High Calorie Dinner; ED: Early Dinner; LD: Late Dinner; FL: Front Loading; EED: Equal Energy Distribution; ML: Middle Loading; BL: Back Loading.

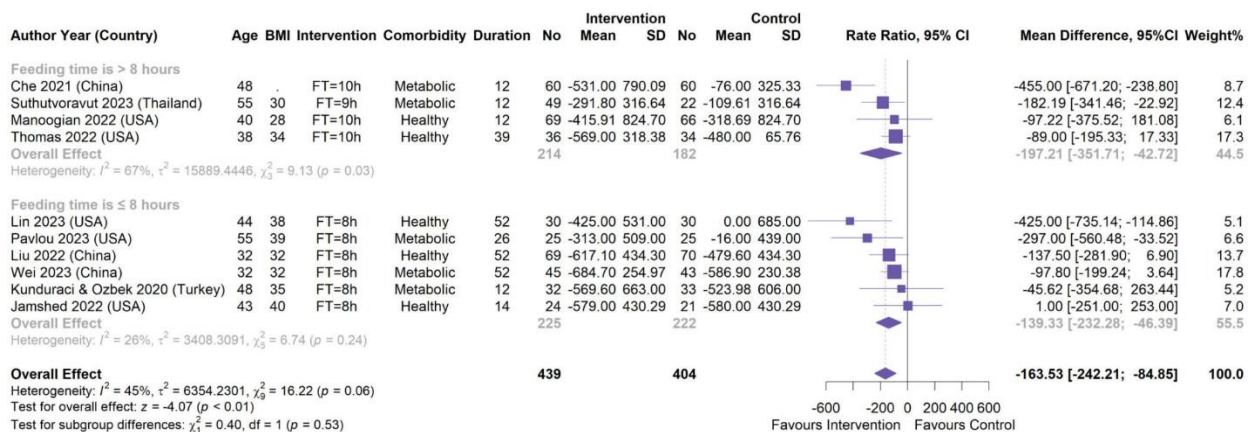

**eFigure 126: Meta-analysis of difference in mean difference (95% CIs) for the effect of time-restricted eating on energy intake (kcal/day), grouped by eating window**

BMI: Body Mass Index; SD: Standard Deviation; CI: Confidence Interval; USA: United States of America; FT: Feeding Time; Duration: follow-up duration in weeks; 2M/3M/6M: 2, 3 or 6 meals; 3M+2S: 3 meals and 2 snacks; 3M+3S: 3 meals and 3 snacks; 10S: Grazing diet – 100kcal every 2-3 hours; HCB: High Calorie Breakfast; HCD: High Calorie Dinner; ED: Early Dinner; LD: Late Dinner; FL: Front Loading; EED: Equal Energy Distribution; ML: Middle Loading; BL: Back Loading.

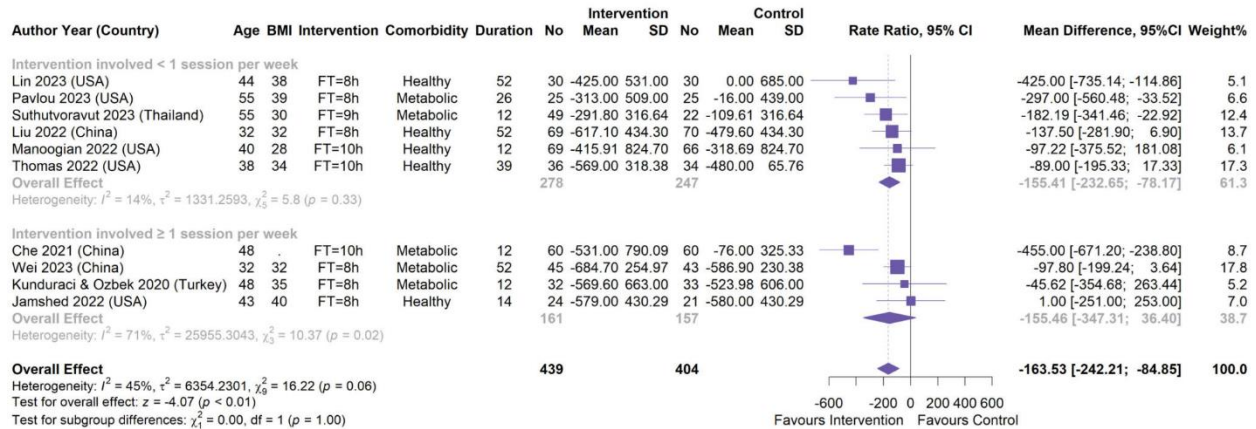

**eFigure 127: Meta-analysis of difference in mean difference (95% CIs) for the effect of time-restricted eating on energy intake (kcal/day), grouped by frequency of contact**

BMI: Body Mass Index; SD: Standard Deviation; CI: Confidence Interval; USA: United States of America; FT: Feeding Time; Duration: follow-up duration in weeks; 2M/3M/6M: 2, 3 or 6 meals; 3M+2S: 3 meals and 2 snacks; 3M+3S: 3 meals and 3 snacks; 10S: Grazing diet – 100kcal every 2-3 hours; HCB: High Calorie Breakfast; HCD: High Calorie Dinner; ED: Early Dinner; LD: Late Dinner; FL: Front Loading; EED: Equal Energy Distribution; ML: Middle Loading; BL: Back Loading.

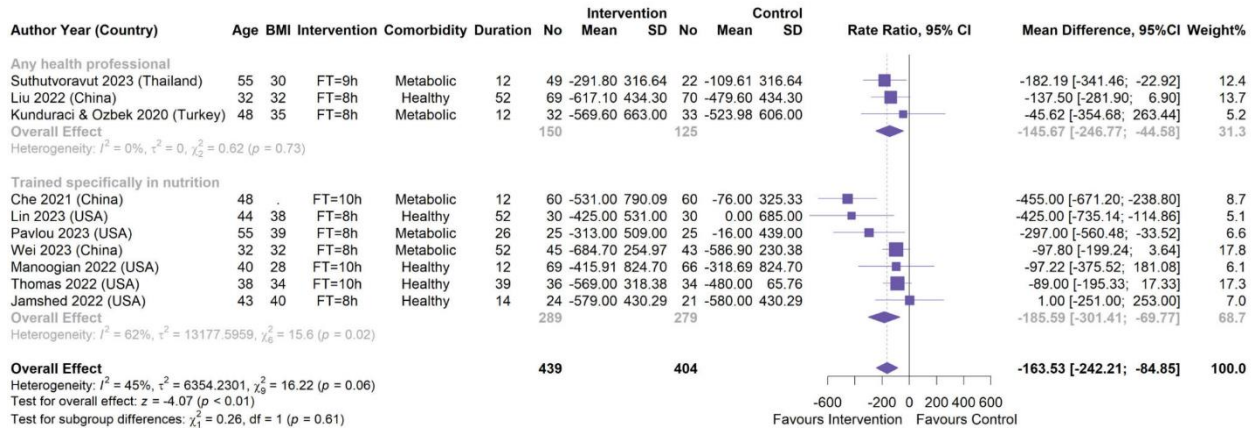

**eFigure 128: Meta-analysis of difference in mean difference (95% CIs) for the effect of time-restricted eating on energy intake (kcal/day), grouped by delivery personnel**

BMI: Body Mass Index; SD: Standard Deviation; CI: Confidence Interval; USA: United States of America; FT: Feeding Time; Duration: follow-up duration in weeks; 2M/3M/6M: 2, 3 or 6 meals; 3M+2S: 3 meals and 2 snacks; 3M+3S: 3 meals and 3 snacks; 10S: Grazing diet – 100kcal every 2-3 hours; HCB: High Calorie Breakfast; HCD: High Calorie Dinner; ED: Early Dinner; LD: Late Dinner; FL: Front Loading; EED: Equal Energy Distribution; ML: Middle Loading; BL: Back Loading.

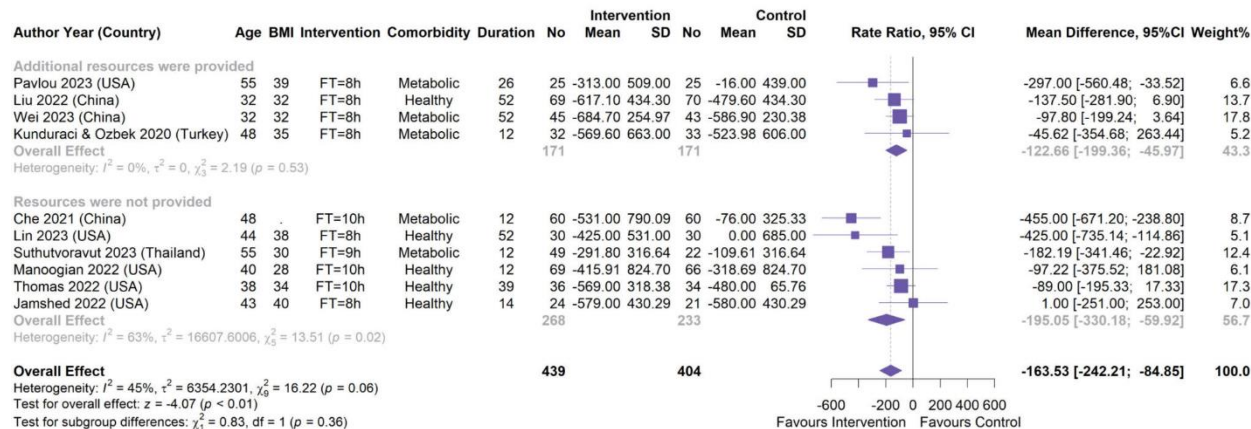

**eFigure 129: Meta-analysis of difference in mean difference (95% CIs) for the effect of time-restricted eating on energy intake (kcal/day), grouped by resource provision**

BMI: Body Mass Index; SD: Standard Deviation; CI: Confidence Interval; USA: United States of America; FT: Feeding Time; Duration: follow-up duration in weeks; 2M/3M/6M: 2, 3 or 6 meals; 3M+2S: 3 meals and 2 snacks; 3M+3S: 3 meals and 3 snacks; 10S: Grazing diet – 100kcal every 2-3 hours; HCB: High Calorie Breakfast; HCD: High Calorie Dinner; ED: Early Dinner; LD: Late Dinner; FL: Front Loading; EED: Equal Energy Distribution; ML: Middle Loading; BL: Back Loading.

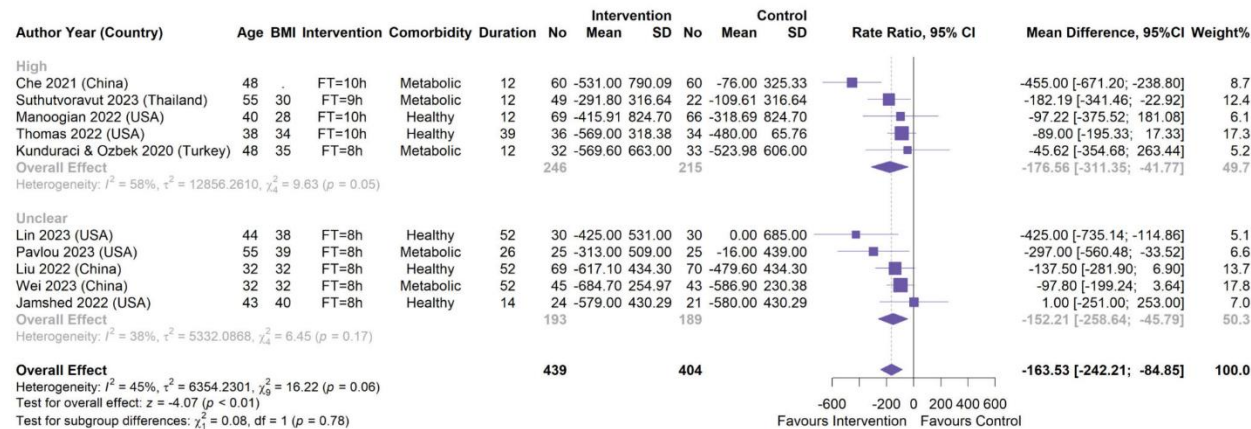

**eFigure 130: Meta-analysis of difference in mean difference (95% CIs) for the effect of time-restricted eating on energy intake (kcal/day), grouped by risk of bias**

BMI: Body Mass Index; SD: Standard Deviation; CI: Confidence Interval; USA: United States of America; FT: Feeding Time; Duration: follow-up duration in weeks; 2M/3M/6M: 2, 3 or 6 meals; 3M+2S: 3 meals and 2 snacks; 3M+3S: 3 meals and 3 snacks; 10S: Grazing diet – 100kcal every 2-3 hours; HCB: High Calorie Breakfast; HCD: High Calorie Dinner; ED: Early Dinner; LD: Late Dinner; FL: Front Loading; EED: Equal Energy Distribution; ML: Middle Loading; BL: Back Loading.



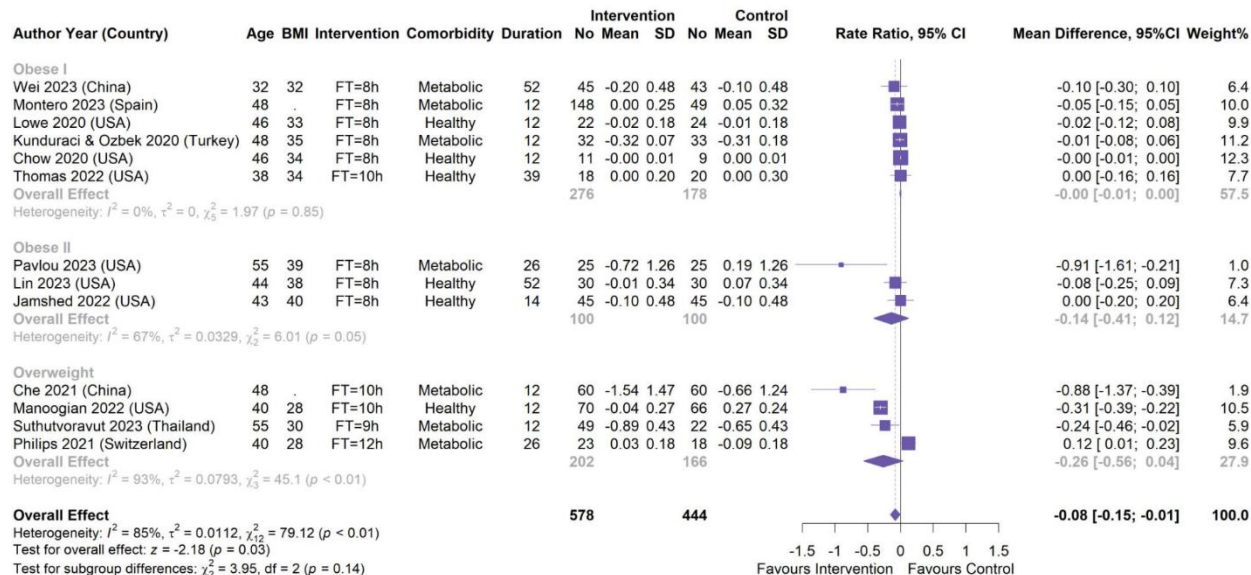

**eFigure 131: Meta-analysis of difference in mean difference (95% CIs) for the effect of time-restricted eating on HbA1c (%), grouped by baseline BMI status**

BMI: Body Mass Index; SD: Standard Deviation; CI: Confidence Interval; USA: United States of America; FT: Feeding Time; Duration: follow-up duration in weeks; 2M/3M/6M: 2, 3 or 6 meals; 3M+2S: 3 meals and 2 snacks; 3M+3S: 3 meals and 3 snacks; 10S: Grazing diet – 100kcal every 2-3 hours; HCB: High Calorie Breakfast; HCD: High Calorie Dinner; ED: Early Dinner; LD: Late Dinner; FL: Front Loading; EED: Equal Energy Distribution; ML: Middle Loading; BL: Back Loading.

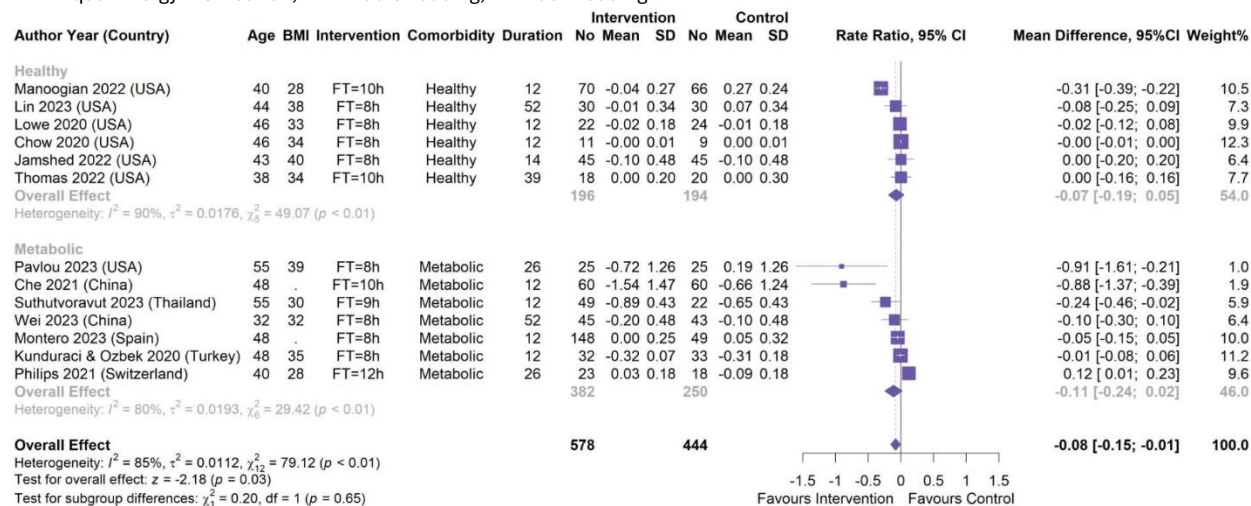

**eFigure 132: Meta-analysis of difference in mean difference (95% CIs) for the effect of time-restricted eating on HbA1c (%), grouped by health status**

BMI: Body Mass Index; SD: Standard Deviation; CI: Confidence Interval; USA: United States of America; FT: Feeding Time; Duration: follow-up duration in weeks; 2M/3M/6M: 2, 3 or 6 meals; 3M+2S: 3 meals and 2 snacks; 3M+3S: 3 meals and 3 snacks; 10S: Grazing diet – 100kcal every 2-3 hours; HCB: High Calorie Breakfast; HCD: High Calorie Dinner; ED: Early Dinner; LD: Late Dinner; FL: Front Loading; EED: Equal Energy Distribution; ML: Middle Loading; BL: Back Loading.

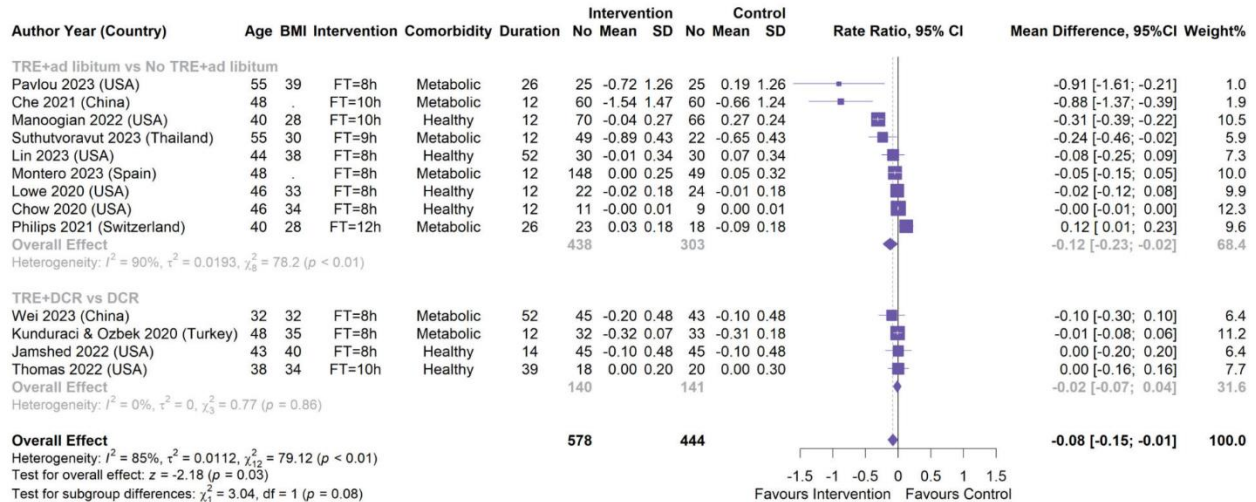

**eFigure 133: Meta-analysis of difference in mean difference (95% CIs) for the effect of time-restricted eating on HbA1c (%), grouped by energy prescription**

BMI: Body Mass Index; SD: Standard Deviation; CI: Confidence Interval; USA: United States of America; FT: Feeding Time; Duration: follow-up duration in weeks; 2M/3M/6M: 2, 3 or 6 meals; 3M+2S: 3 meals and 2 snacks; 3M+3S: 3 meals and 3 snacks; 10S: Grazing diet – 100kcal every 2-3 hours; HCB: High Calorie Breakfast; HCD: High Calorie Dinner; ED: Early Dinner; LD: Late Dinner; FL: Front Loading; EED: Equal Energy Distribution; ML: Middle Loading; BL: Back Loading.

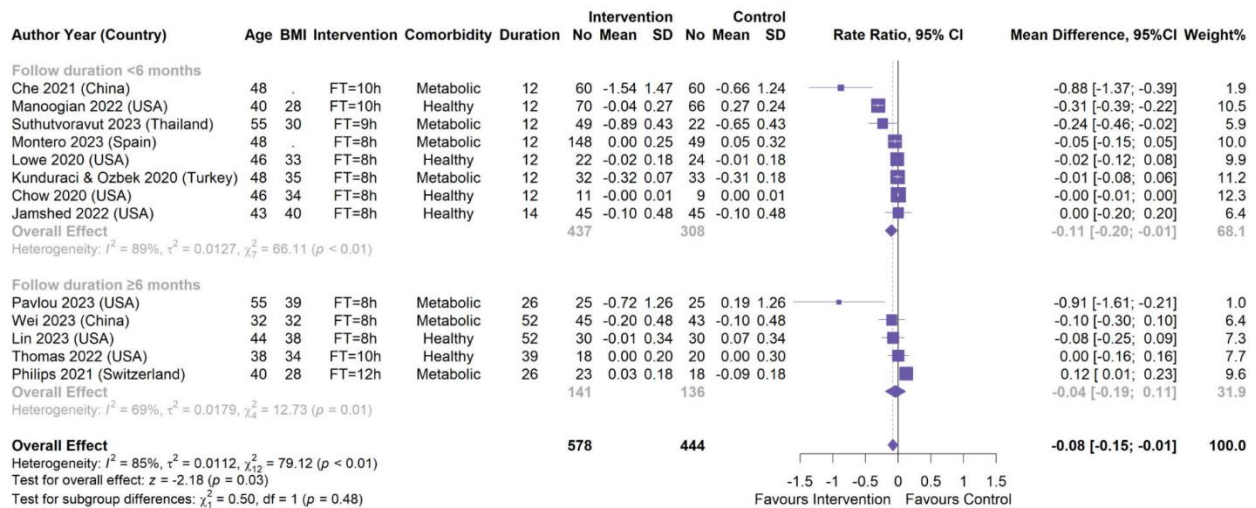

**eFigure 134: Meta-analysis of difference in mean difference (95% CIs) for the effect of time-restricted eating on HbA1c (%), grouped by follow duration**

BMI: Body Mass Index; SD: Standard Deviation; CI: Confidence Interval; USA: United States of America; FT: Feeding Time; Duration: follow-up duration in weeks; 2M/3M/6M: 2, 3 or 6 meals; 3M+2S: 3 meals and 2 snacks; 3M+3S: 3 meals and 3 snacks; 10S: Grazing diet – 100kcal every 2-3 hours; HCB: High Calorie Breakfast; HCD: High Calorie Dinner; ED: Early Dinner; LD: Late Dinner; FL: Front Loading; EED: Equal Energy Distribution; ML: Middle Loading; BL: Back Loading.

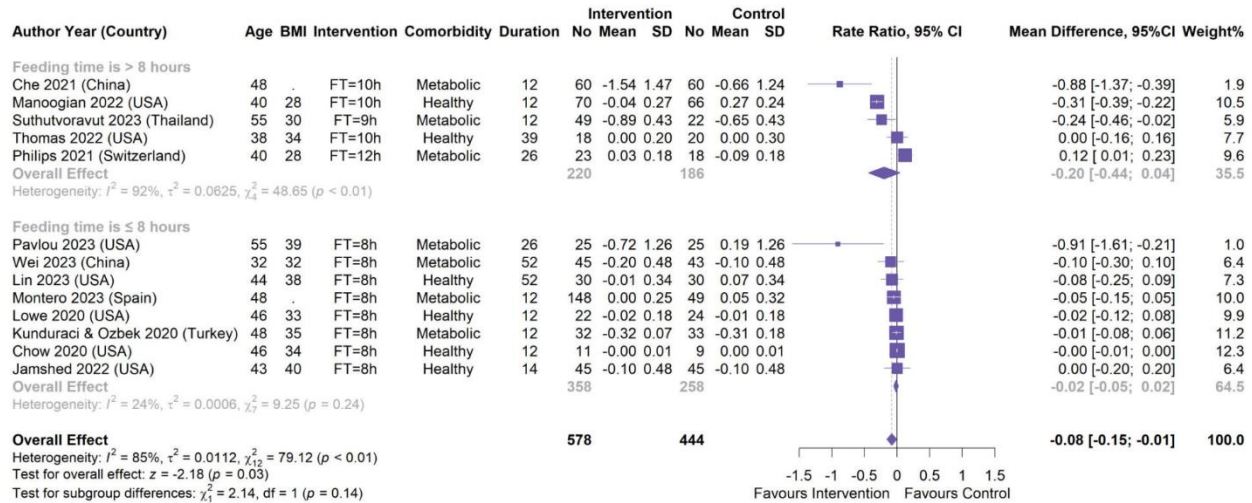

**eFigure 135: Meta-analysis of difference in mean difference (95% CIs) for the effect of time-restricted eating on HbA1c (%), grouped by eating window**

BMI: Body Mass Index; SD: Standard Deviation; CI: Confidence Interval; USA: United States of America; FT: Feeding Time; Duration: follow-up duration in weeks; 2M/3M/6M: 2, 3 or 6 meals; 3M+2S: 3 meals and 2 snacks; 3M+3S: 3 meals and 3 snacks; 10S: Grazing diet – 100kcal every 2-3 hours; HCB: High Calorie Breakfast; HCD: High Calorie Dinner; ED: Early Dinner; LD: Late Dinner; FL: Front Loading; EED: Equal Energy Distribution; ML: Middle Loading; BL: Back Loading.

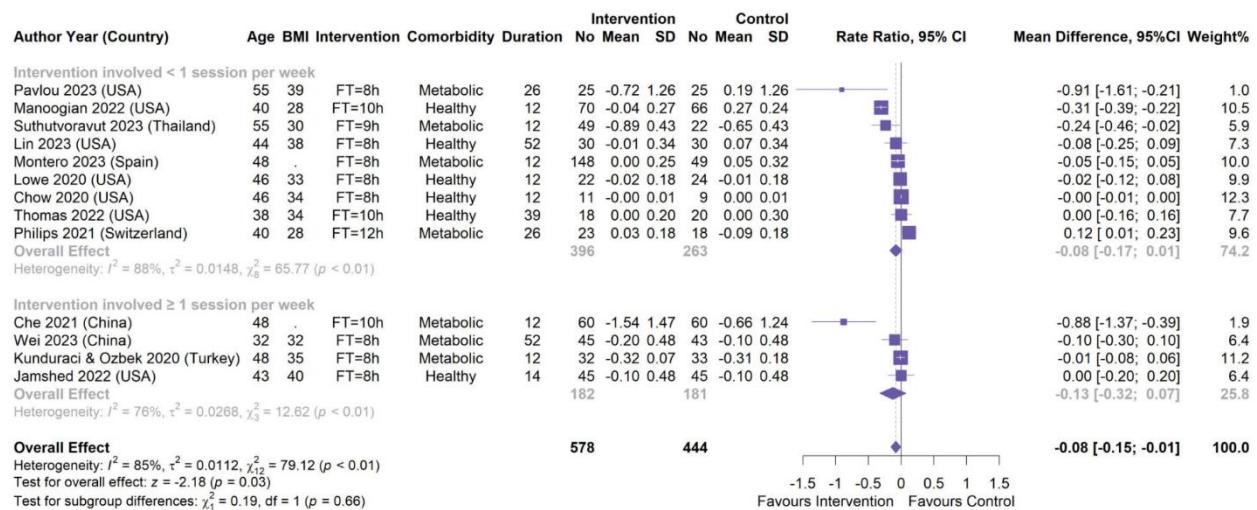

**eFigure 136: Meta-analysis of difference in mean difference (95% CIs) for the effect of time-restricted eating on HbA1c (%), grouped by frequency of contact**

BMI: Body Mass Index; SD: Standard Deviation; CI: Confidence Interval; USA: United States of America; FT: Feeding Time; Duration: follow-up duration in weeks; 2M/3M/6M: 2, 3 or 6 meals; 3M+2S: 3 meals and 2 snacks; 3M+3S: 3 meals and 3 snacks; 10S: Grazing diet – 100kcal every 2-3 hours; HCB: High Calorie Breakfast; HCD: High Calorie Dinner; ED: Early Dinner; LD: Late Dinner; FL: Front Loading; EED: Equal Energy Distribution; ML: Middle Loading; BL: Back Loading.

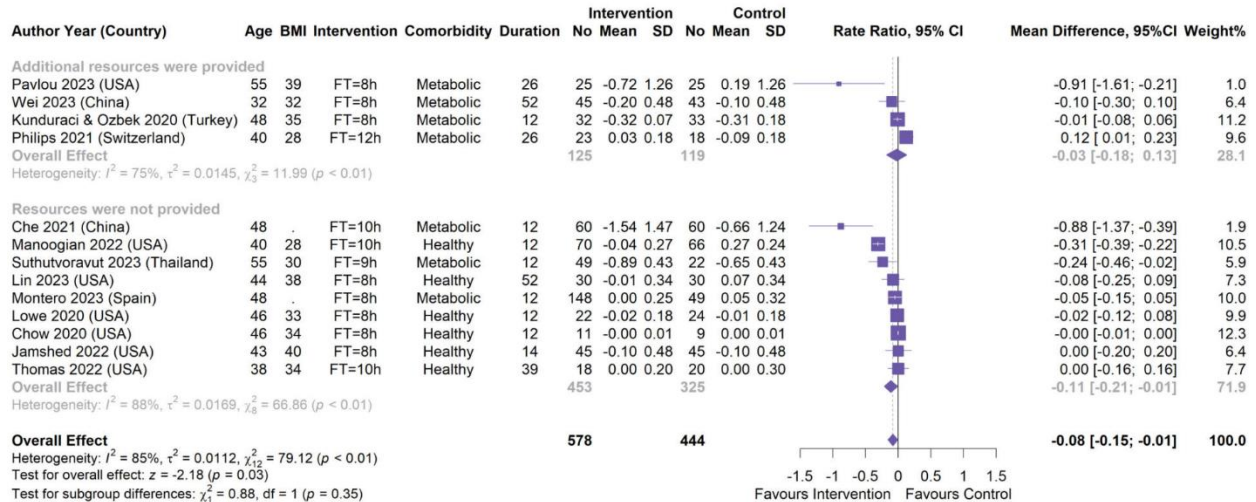

**eFigure 137: Meta-analysis of difference in mean difference (95% CIs) for the effect of time-restricted eating on HbA1c (%), grouped by resource provision**

BMI: Body Mass Index; SD: Standard Deviation; CI: Confidence Interval; USA: United States of America; FT: Feeding Time; Duration: follow-up duration in weeks; 2M/3M/6M: 2, 3 or 6 meals; 3M+2S: 3 meals and 2 snacks; 3M+3S: 3 meals and 3 snacks; 10S: Grazing diet – 100kcal every 2-3 hours; HCB: High Calorie Breakfast; HCD: High Calorie Dinner; ED: Early Dinner; LD: Late Dinner; FL: Front Loading; EED: Equal Energy Distribution; ML: Middle Loading; BL: Back Loading.

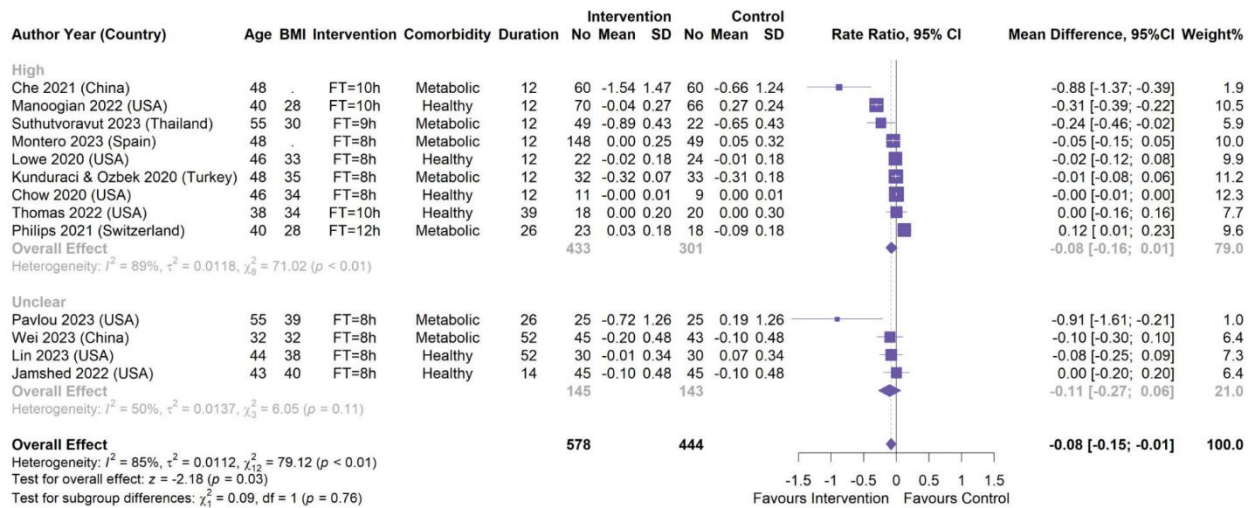

**eFigure 138: Meta-analysis of difference in mean difference (95% CIs) for the effect of time-restricted eating on HbA1c (%), grouped by risk of bias**

BMI: Body Mass Index; SD: Standard Deviation; CI: Confidence Interval; USA: United States of America; FT: Feeding Time; Duration: follow-up duration in weeks; 2M/3M/6M: 2, 3 or 6 meals; 3M+2S: 3 meals and 2 snacks; 3M+3S: 3 meals and 3 snacks; 10S: Grazing diet – 100kcal every 2-3 hours; HCB: High Calorie Breakfast; HCD: High Calorie Dinner; ED: Early Dinner; LD: Late Dinner; FL: Front Loading; EED: Equal Energy Distribution; ML: Middle Loading; BL: Back Loading.

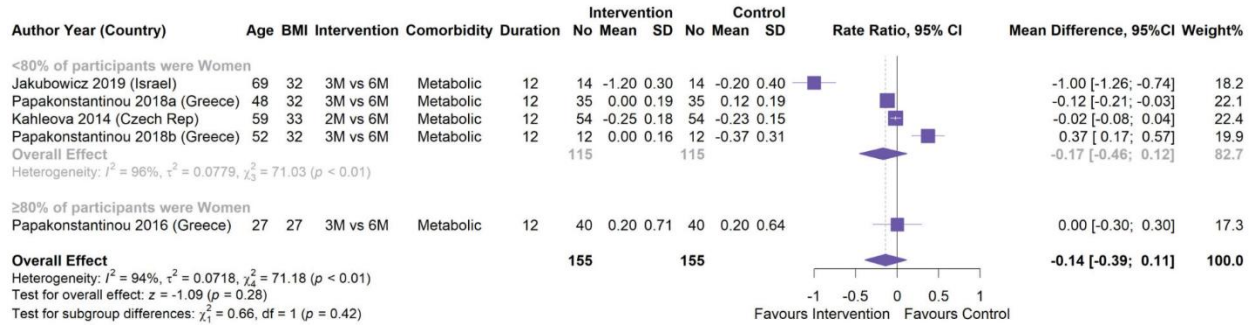

**eFigure 139: Meta-analysis of difference in mean difference (95% CIs) for the effect of meal frequency on HbA1c (%), grouped by gender proportion**

BMI: Body Mass Index; SD: Standard Deviation; CI: Confidence Interval; USA: United States of America; FT: Feeding Time; Duration: follow-up duration in weeks; 2M/3M/6M: 2, 3 or 6 meals; 3M+2S: 3 meals and 2 snacks; 3M+3S: 3 meals and 3 snacks; 10S: Grazing diet – 100kcal every 2-3 hours; HCB: High Calorie Breakfast; HCD: High Calorie Dinner; ED: Early Dinner; LD: Late Dinner; FL: Front Loading; EED: Equal Energy Distribution; ML: Middle Loading; BL: Back Loading.

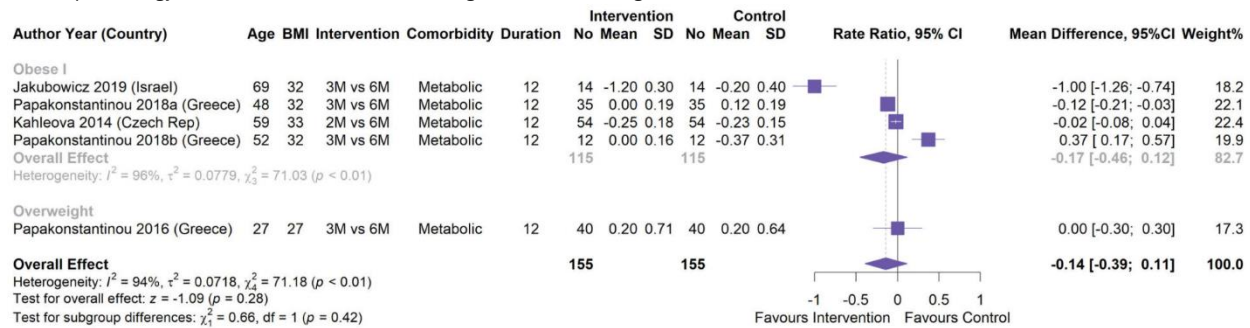

**eFigure 140: Meta-analysis of difference in mean difference (95% CIs) for the effect of meal frequency on HbA1c (%), grouped by baseline BMI status**

BMI: Body Mass Index; SD: Standard Deviation; CI: Confidence Interval; USA: United States of America; FT: Feeding Time; Duration: follow-up duration in weeks; 2M/3M/6M: 2, 3 or 6 meals; 3M+2S: 3 meals and 2 snacks; 3M+3S: 3 meals and 3 snacks; 10S: Grazing diet – 100kcal every 2-3 hours; HCB: High Calorie Breakfast; HCD: High Calorie Dinner; ED: Early Dinner; LD: Late Dinner; FL: Front Loading; EED: Equal Energy Distribution; ML: Middle Loading; BL: Back Loading.

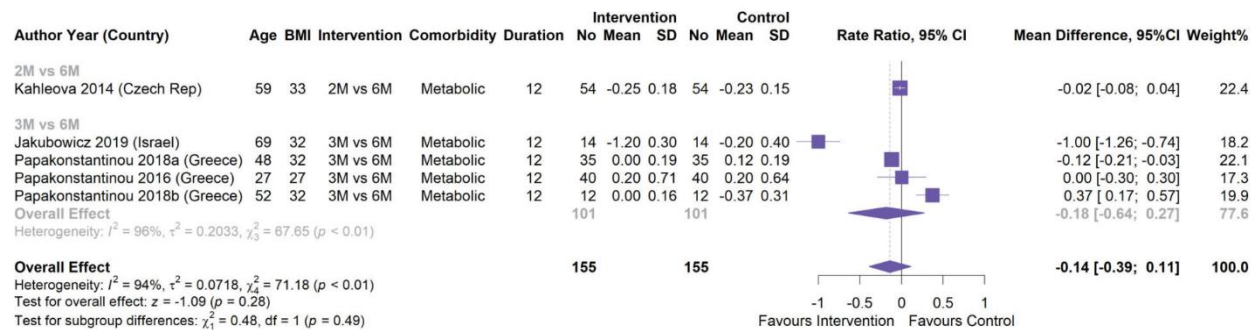

**eFigure 141: Meta-analysis of difference in mean difference (95% CIs) for the effect of meal frequency on HbA1c (%), grouped by intervention intensity**

BMI: Body Mass Index; SD: Standard Deviation; CI: Confidence Interval; USA: United States of America; FT: Feeding Time; Duration: follow-up duration in weeks; 2M/3M/6M: 2, 3 or 6 meals; 3M+2S: 3 meals and 2 snacks; 3M+3S: 3 meals and 3 snacks; 10S: Grazing diet – 100kcal every 2-3 hours; HCB: High Calorie Breakfast; HCD: High Calorie Dinner; ED: Early Dinner; LD: Late Dinner; FL: Front Loading; EED: Equal Energy Distribution; ML: Middle Loading; BL: Back Loading.

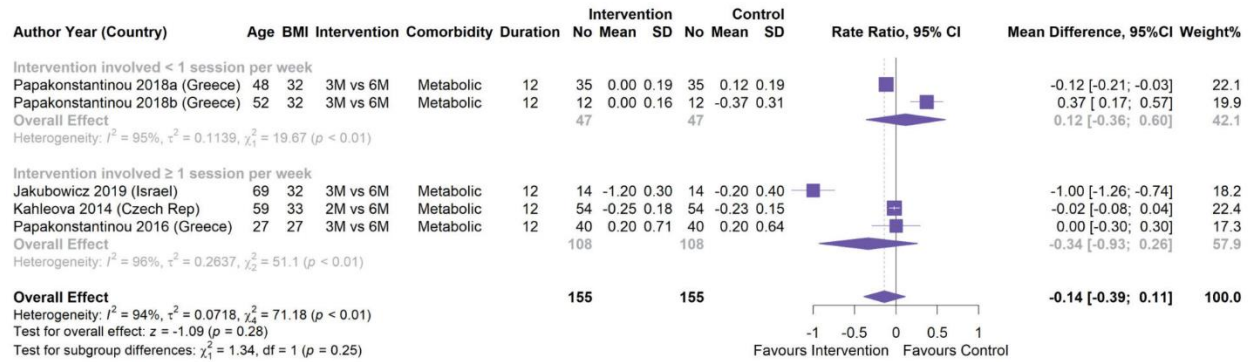

**eFigure 142: Meta-analysis of difference in mean difference (95% CIs) for the effect of meal frequency on HbA1c (%), grouped by frequency of contact**

BMI: Body Mass Index; SD: Standard Deviation; CI: Confidence Interval; USA: United States of America; FT: Feeding Time; Duration: follow-up duration in weeks; 2M/3M/6M: 2, 3 or 6 meals; 3M+2S: 3 meals and 2 snacks; 3M+3S: 3 meals and 3 snacks; 10S: Grazing diet – 100kcal every 2-3 hours; HCB: High Calorie Breakfast; HCD: High Calorie Dinner; ED: Early Dinner; LD: Late Dinner; FL: Front Loading; EED: Equal Energy Distribution; ML: Middle Loading; BL: Back Loading.

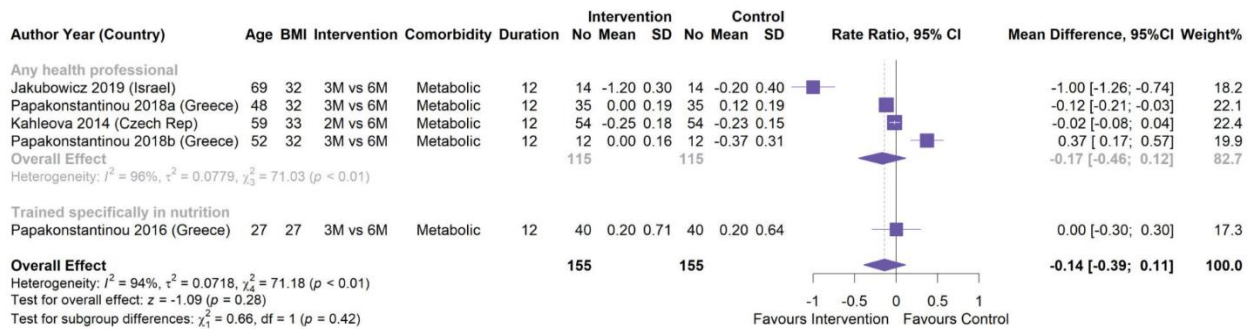

**eFigure 143: Meta-analysis of difference in mean difference (95% CIs) for the effect of meal frequency on HbA1c (%), grouped by delivery personnel**

BMI: Body Mass Index; SD: Standard Deviation; CI: Confidence Interval; USA: United States of America; FT: Feeding Time; Duration: follow-up duration in weeks; 2M/3M/6M: 2, 3 or 6 meals; 3M+2S: 3 meals and 2 snacks; 3M+3S: 3 meals and 3 snacks; 10S: Grazing diet – 100kcal every 2-3 hours; HCB: High Calorie Breakfast; HCD: High Calorie Dinner; ED: Early Dinner; LD: Late Dinner; FL: Front Loading; EED: Equal Energy Distribution; ML: Middle Loading; BL: Back Loading.

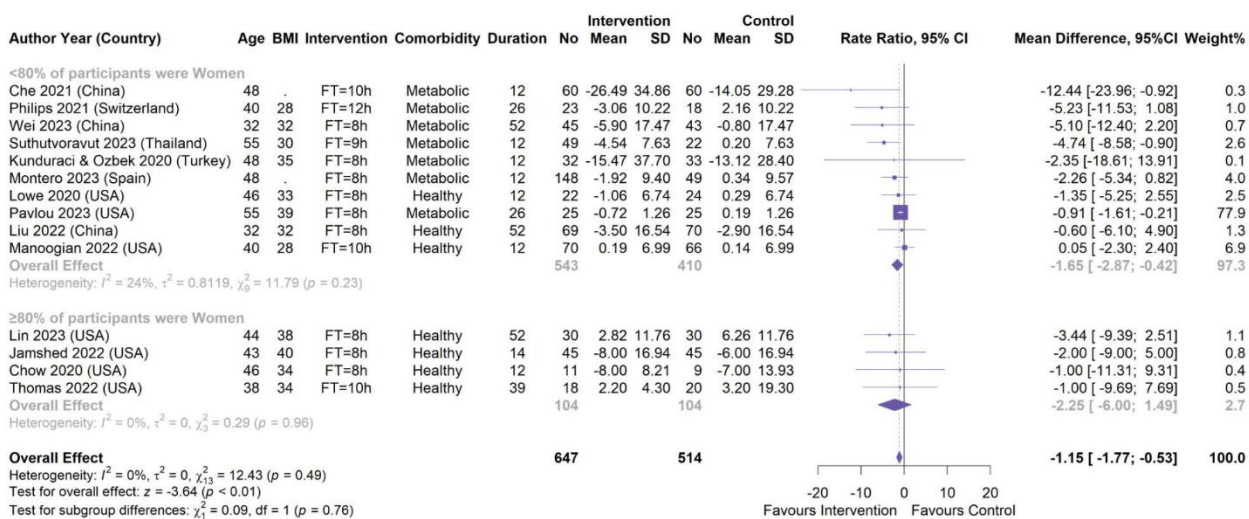

**eFigure 144: Meta-analysis of difference in mean difference (95% CIs) for the effect of time-restricted eating on fasting glucose (mg/dL), grouped by gender proportion**

BMI: Body Mass Index; SD: Standard Deviation; CI: Confidence Interval; USA: United States of America; FT: Feeding Time; Duration: follow-up duration in weeks; 2M/3M/6M: 2, 3 or 6 meals; 3M+2S: 3 meals and 2 snacks; 3M+3S: 3 meals and 3 snacks; 10S: Grazing diet – 100kcal every 2-3 hours; HCB: High Calorie Breakfast; HCD: High Calorie Dinner; ED: Early Dinner; LD: Late Dinner; FL: Front Loading; EED: Equal Energy Distribution; ML: Middle Loading; BL: Back Loading.

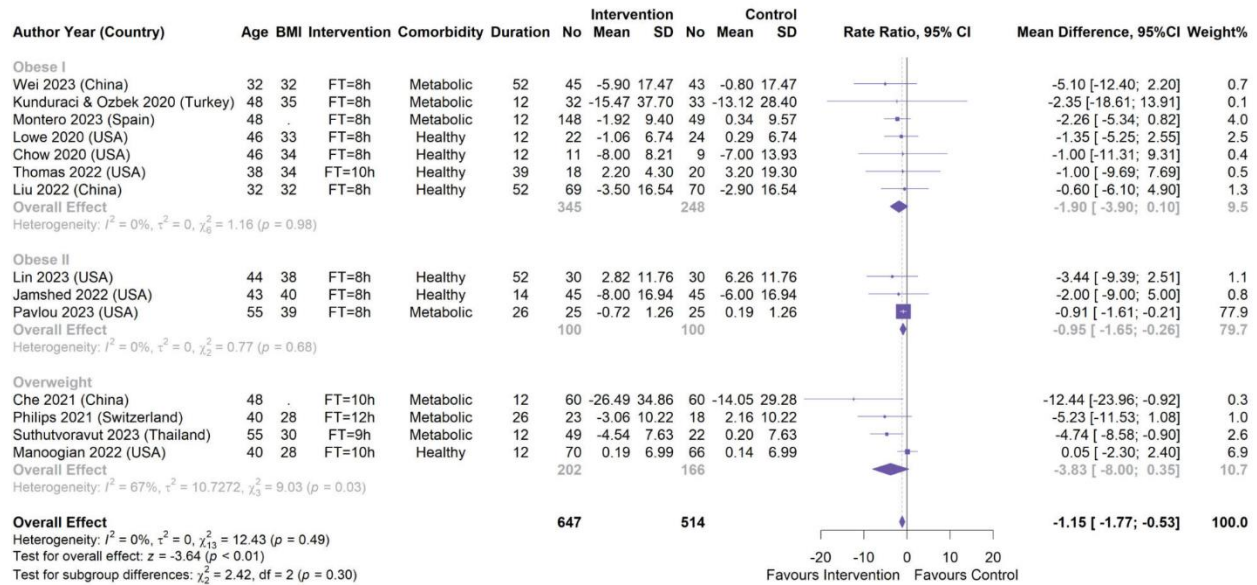

**eFigure 145: Meta-analysis of difference in mean difference (95% CIs) for the effect of time-restricted eating on fasting glucose (mg/dL), grouped by baseline BMI status**

BMI: Body Mass Index; SD: Standard Deviation; CI: Confidence Interval; USA: United States of America; FT: Feeding Time; Duration: follow-up duration in weeks; 2M/3M/6M: 2, 3 or 6 meals; 3M+2S: 3 meals and 2 snacks; 3M+3S: 3 meals and 3 snacks; 10S: Grazing diet – 100kcal every 2-3 hours; HCB: High Calorie Breakfast; HCD: High Calorie Dinner; ED: Early Dinner; LD: Late Dinner; FL: Front Loading; EED: Equal Energy Distribution; ML: Middle Loading; BL: Back Loading.

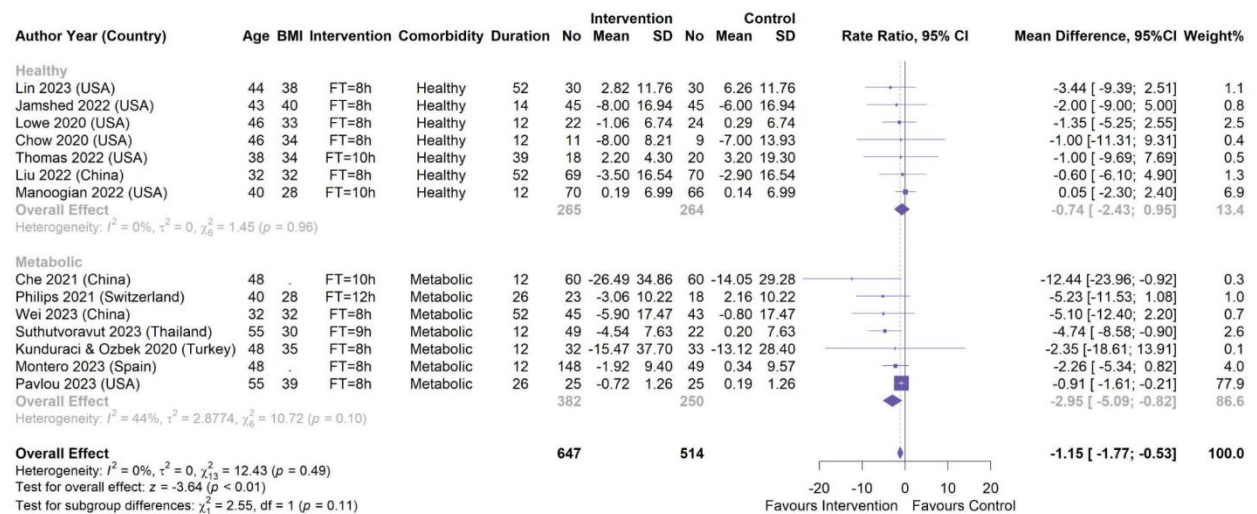

**eFigure 146: Meta-analysis of difference in mean difference (95% CIs) for the effect of time-restricted eating on fasting glucose (mg/dL), grouped by health status**

BMI: Body Mass Index; SD: Standard Deviation; CI: Confidence Interval; USA: United States of America; FT: Feeding Time; Duration: follow-up duration in weeks; 2M/3M/6M: 2, 3 or 6 meals; 3M+2S: 3 meals and 2 snacks; 3M+3S: 3 meals and 3 snacks; 10S: Grazing diet – 100kcal every 2-3 hours; HCB: High Calorie Breakfast; HCD: High Calorie Dinner; ED: Early Dinner; LD: Late Dinner; FL: Front Loading; EED: Equal Energy Distribution; ML: Middle Loading; BL: Back Loading.

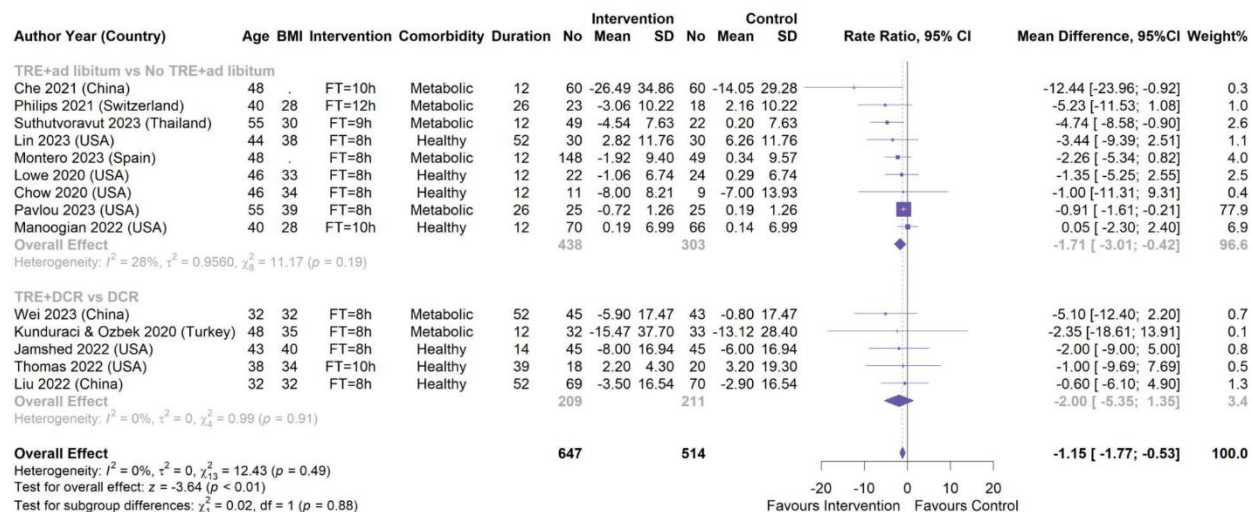

**eFigure 147: Meta-analysis of difference in mean difference (95% CIs) for the effect of time-restricted eating on fasting glucose (mg/dL), grouped by energy prescription**

BMI: Body Mass Index; SD: Standard Deviation; CI: Confidence Interval; USA: United States of America; FT: Feeding Time; Duration: follow-up duration in weeks; 2M/3M/6M: 2, 3 or 6 meals; 3M+2S: 3 meals and 2 snacks; 3M+3S: 3 meals and 3 snacks; 10S: Grazing diet – 100kcal every 2-3 hours; HCB: High Calorie Breakfast; HCD: High Calorie Dinner; ED: Early Dinner; LD: Late Dinner; FL: Front Loading; EED: Equal Energy Distribution; ML: Middle Loading; BL: Back Loading.

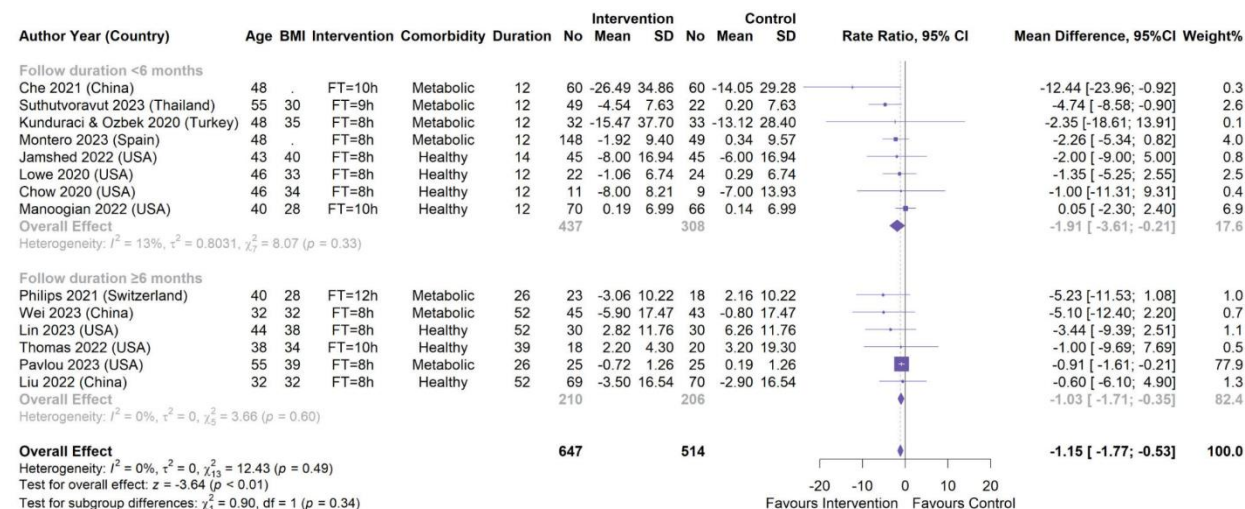

**eFigure 148: Meta-analysis of difference in mean difference (95% CIs) for the effect of time-restricted eating on fasting glucose (mg/dL), grouped by follow duration**

BMI: Body Mass Index; SD: Standard Deviation; CI: Confidence Interval; USA: United States of America; FT: Feeding Time; Duration: follow-up duration in weeks; 2M/3M/6M: 2, 3 or 6 meals; 3M+2S: 3 meals and 2 snacks; 3M+3S: 3 meals and 3 snacks; 10S: Grazing diet – 100kcal every 2-3 hours; HCB: High Calorie Breakfast; HCD: High Calorie Dinner; ED: Early Dinner; LD: Late Dinner; FL: Front Loading; EED: Equal Energy Distribution; ML: Middle Loading; BL: Back Loading.



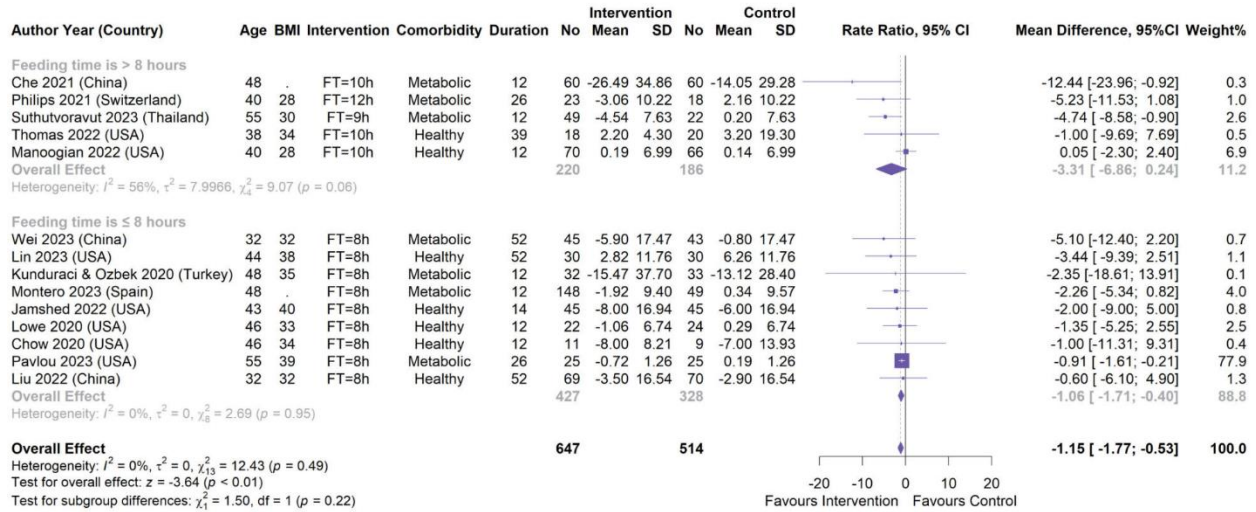

**eFigure 149: Meta-analysis of difference in mean difference (95% CIs) for the effect of time-restricted eating on fasting glucose (mg/dL), grouped by eating window**

BMI: Body Mass Index; SD: Standard Deviation; CI: Confidence Interval; USA: United States of America; FT: Feeding Time; Duration: follow-up duration in weeks; 2M/3M/6M: 2, 3 or 6 meals; 3M+2S: 3 meals and 2 snacks; 3M+3S: 3 meals and 3 snacks; 10S: Grazing diet – 100kcal every 2-3 hours; HCB: High Calorie Breakfast; HCD: High Calorie Dinner; ED: Early Dinner; LD: Late Dinner; FL: Front Loading; EED: Equal Energy Distribution; ML: Middle Loading; BL: Back Loading.

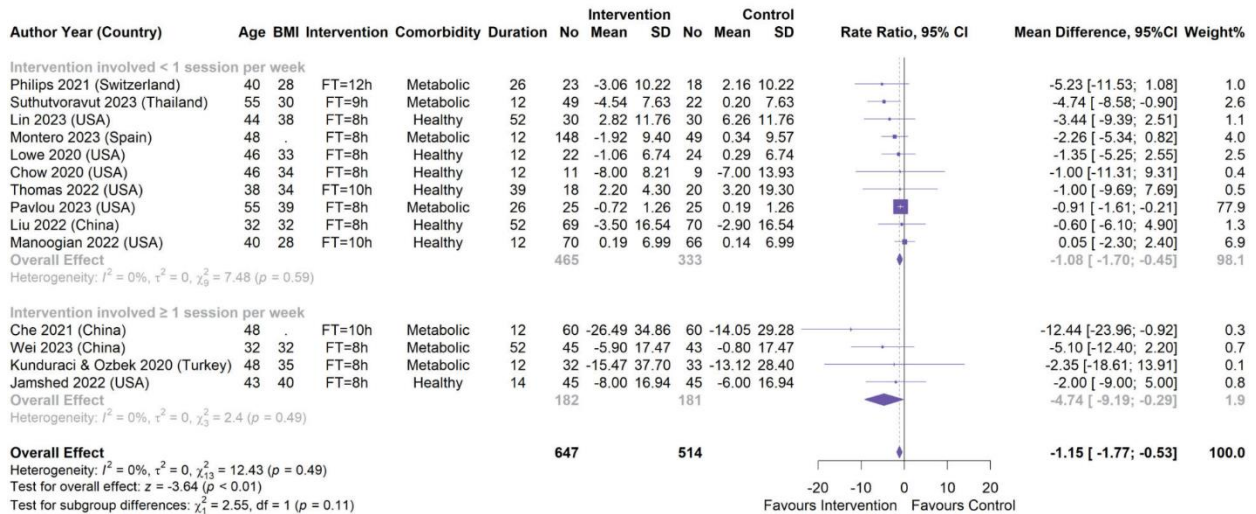

**eFigure 150: Meta-analysis of difference in mean difference (95% CIs) for the effect of time-restricted eating on fasting glucose (mg/dL), grouped by frequency of contact**

BMI: Body Mass Index; SD: Standard Deviation; CI: Confidence Interval; USA: United States of America; FT: Feeding Time; Duration: follow-up duration in weeks; 2M/3M/6M: 2, 3 or 6 meals; 3M+2S: 3 meals and 2 snacks; 3M+3S: 3 meals and 3 snacks; 10S: Grazing diet – 100kcal every 2-3 hours; HCB: High Calorie Breakfast; HCD: High Calorie Dinner; ED: Early Dinner; LD: Late Dinner; FL: Front Loading; EED: Equal Energy Distribution; ML: Middle Loading; BL: Back Loading.

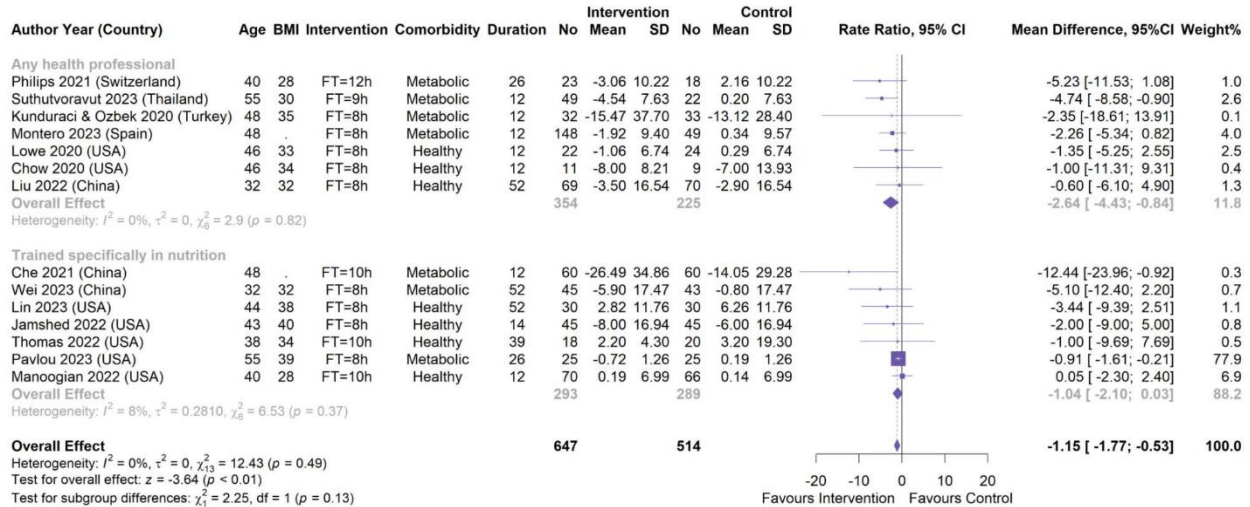

**eFigure 151: Meta-analysis of difference in mean difference (95% CIs) for the effect of time-restricted eating on fasting glucose (mg/dL), grouped by delivery personnel**

BMI: Body Mass Index; SD: Standard Deviation; CI: Confidence Interval; USA: United States of America; FT: Feeding Time; Duration: follow-up duration in weeks; 2M/3M/6M: 2, 3 or 6 meals; 3M+2S: 3 meals and 2 snacks; 3M+3S: 3 meals and 3 snacks; 10S: Grazing diet – 100kcal every 2-3 hours; HCB: High Calorie Breakfast; HCD: High Calorie Dinner; ED: Early Dinner; LD: Late Dinner; FL: Front Loading; EED: Equal Energy Distribution; ML: Middle Loading; BL: Back Loading.

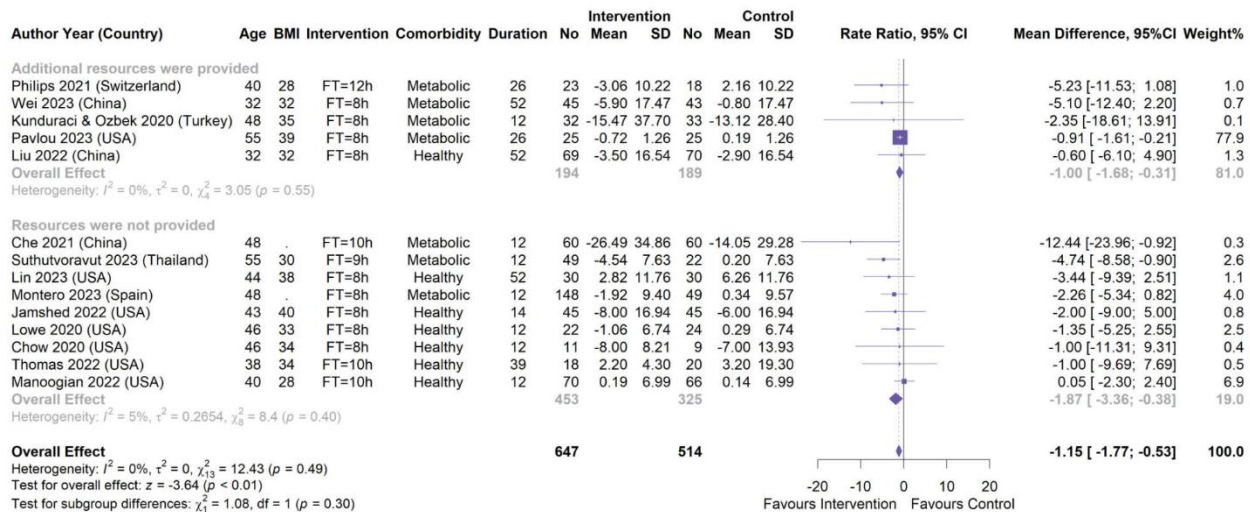

**eFigure 152: Meta-analysis of difference in mean difference (95% CIs) for the effect of time-restricted eating on fasting glucose (mg/dL), grouped by resource provision**

BMI: Body Mass Index; SD: Standard Deviation; CI: Confidence Interval; USA: United States of America; FT: Feeding Time; Duration: follow-up duration in weeks; 2M/3M/6M: 2, 3 or 6 meals; 3M+2S: 3 meals and 2 snacks; 3M+3S: 3 meals and 3 snacks; 10S: Grazing diet – 100kcal every 2-3 hours; HCB: High Calorie Breakfast; HCD: High Calorie Dinner; ED: Early Dinner; LD: Late Dinner; FL: Front Loading; EED: Equal Energy Distribution; ML: Middle Loading; BL: Back Loading.

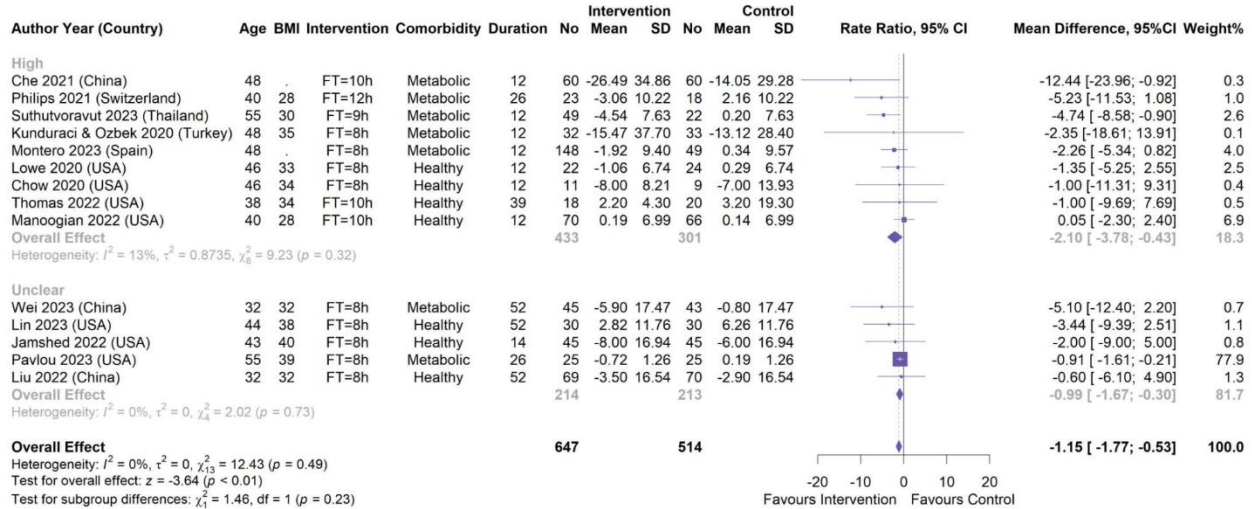

**eFigure 153: Meta-analysis of difference in mean difference (95% CIs) for the effect of time-restricted eating on fasting glucose (mg/dL), grouped by risk of bias**

BMI: Body Mass Index; SD: Standard Deviation; CI: Confidence Interval; USA: United States of America; FT: Feeding Time; Duration: follow-up duration in weeks; 2M/3M/6M: 2, 3 or 6 meals; 3M+2S: 3 meals and 2 snacks; 3M+3S: 3 meals and 3 snacks; 10S: Grazing diet – 100kcal every 2-3 hours; HCB: High Calorie Breakfast; HCD: High Calorie Dinner; ED: Early Dinner; LD: Late Dinner; FL: Front Loading; EED: Equal Energy Distribution; ML: Middle Loading; BL: Back Loading.

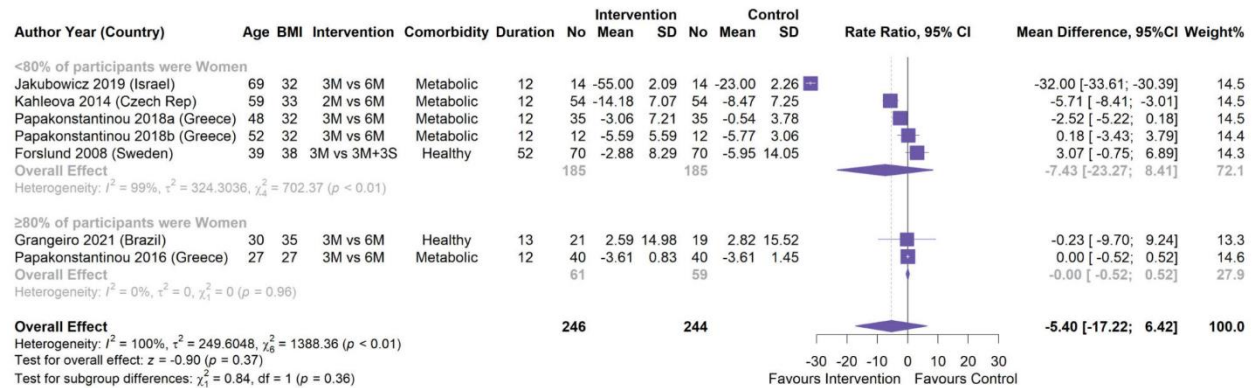

**eFigure 154: Meta-analysis of difference in mean difference (95% CIs) for the effect of meal frequency on fasting glucose (mg/dL), grouped by gender proportion**

BMI: Body Mass Index; SD: Standard Deviation; CI: Confidence Interval; USA: United States of America; FT: Feeding Time; Duration: follow-up duration in weeks; 2M/3M/6M: 2, 3 or 6 meals; 3M+2S: 3 meals and 2 snacks; 3M+3S: 3 meals and 3 snacks; 10S: Grazing diet – 100kcal every 2-3 hours; HCB: High Calorie Breakfast; HCD: High Calorie Dinner; ED: Early Dinner; LD: Late Dinner; FL: Front Loading; EED: Equal Energy Distribution; ML: Middle Loading; BL: Back Loading.

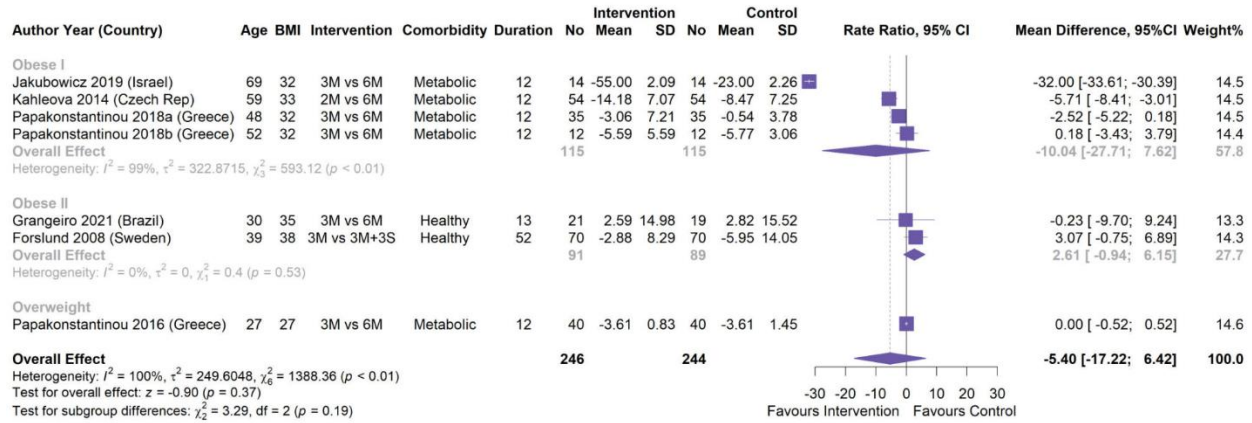

**eFigure 155: Meta-analysis of difference in mean difference (95% CIs) for the effect of meal frequency on fasting glucose (mg/dL), grouped by baseline BMI status**

BMI: Body Mass Index; SD: Standard Deviation; CI: Confidence Interval; USA: United States of America; FT: Feeding Time; Duration: follow-up duration in weeks; 2M/3M/6M: 2, 3 or 6 meals; 3M+2S: 3 meals and 2 snacks; 3M+3S: 3 meals and 3 snacks; 10S: Grazing diet – 100kcal every 2-3 hours; HCB: High Calorie Breakfast; HCD: High Calorie Dinner; ED: Early Dinner; LD: Late Dinner; FL: Front Loading; EED: Equal Energy Distribution; ML: Middle Loading; BL: Back Loading.

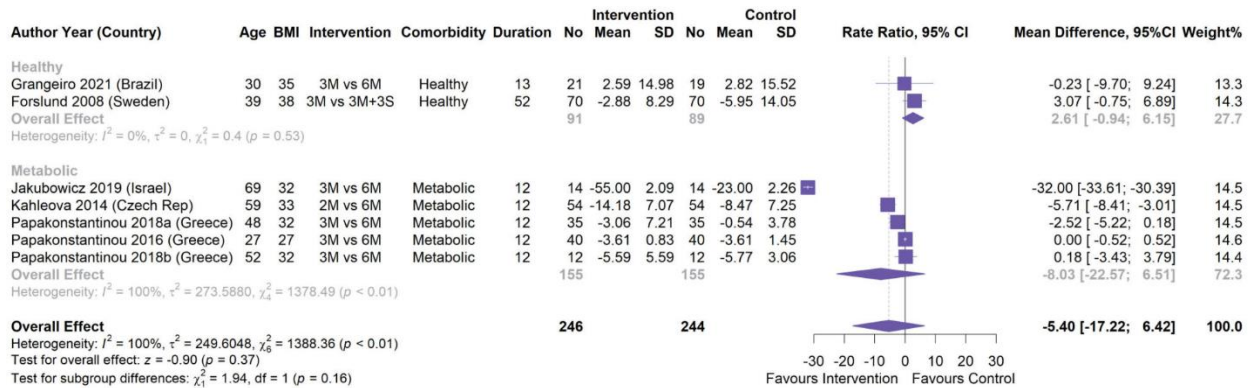

**eFigure 156: Meta-analysis of difference in mean difference (95% CIs) for the effect of meal frequency on fasting glucose (mg/dL), grouped by health status**

BMI: Body Mass Index; SD: Standard Deviation; CI: Confidence Interval; USA: United States of America; FT: Feeding Time; Duration: follow-up duration in weeks; 2M/3M/6M: 2, 3 or 6 meals; 3M+2S: 3 meals and 2 snacks; 3M+3S: 3 meals and 3 snacks; 10S: Grazing diet – 100kcal every 2-3 hours; HCB: High Calorie Breakfast; HCD: High Calorie Dinner; ED: Early Dinner; LD: Late Dinner; FL: Front Loading; EED: Equal Energy Distribution; ML: Middle Loading; BL: Back Loading.

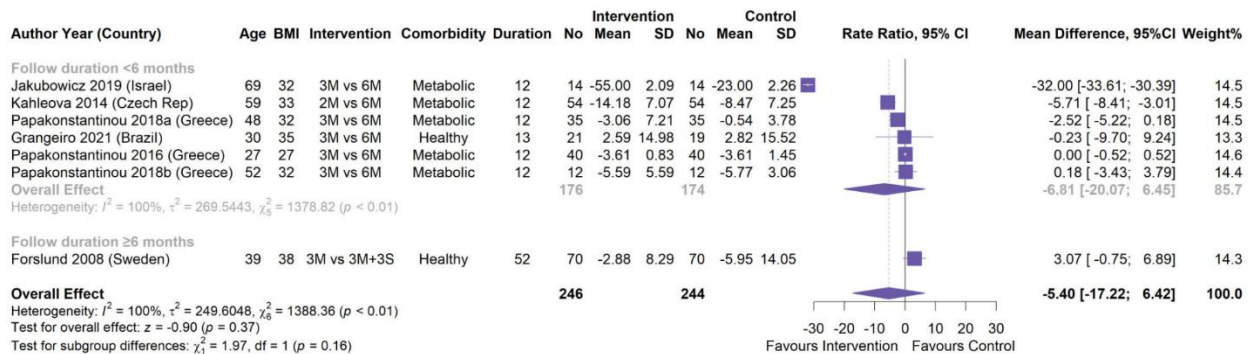

**eFigure 157: Meta-analysis of difference in mean difference (95% CIs) for the effect of meal frequency on fasting glucose (mg/dL), grouped by follow duration**

BMI: Body Mass Index; SD: Standard Deviation; CI: Confidence Interval; USA: United States of America; FT: Feeding Time; Duration: follow-up duration in weeks; 2M/3M/6M: 2, 3 or 6 meals; 3M+2S: 3 meals and 2 snacks; 3M+3S: 3 meals and 3 snacks; 10S: Grazing diet

– 100kcal every 2-3 hours; HCB: High Calorie Breakfast; HCD: High Calorie Dinner; ED: Early Dinner; LD: Late Dinner; FL: Front Loading; EED: Equal Energy Distribution; ML: Middle Loading; BL: Back Loading.

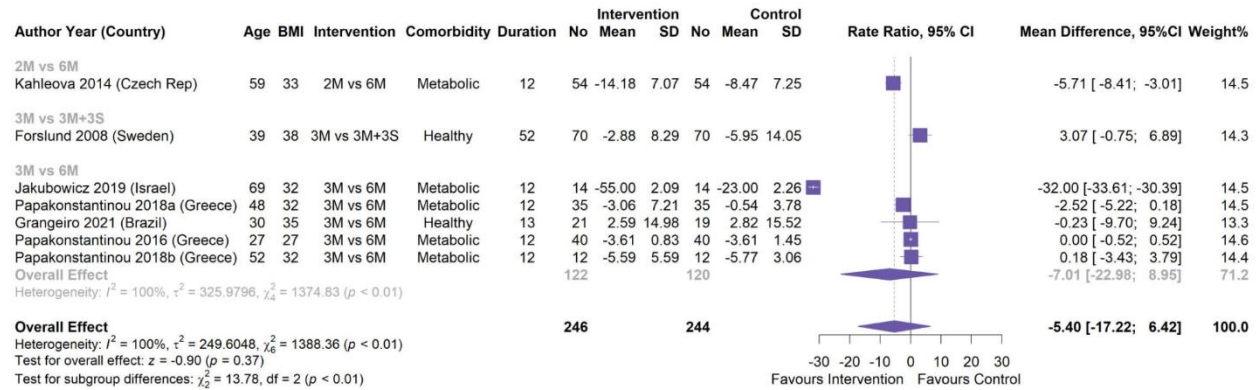

**eFigure 158: Meta-analysis of difference in mean difference (95% CIs) for the effect of meal frequency on fasting glucose (mg/dL), grouped by intervention intensity**

BMI: Body Mass Index; SD: Standard Deviation; CI: Confidence Interval; USA: United States of America; FT: Feeding Time; Duration: follow-up duration in weeks; 2M/3M/6M: 2, 3 or 6 meals; 3M+2S: 3 meals and 2 snacks; 3M+3S: 3 meals and 3 snacks; 10S: Grazing diet – 100kcal every 2-3 hours; HCB: High Calorie Breakfast; HCD: High Calorie Dinner; ED: Early Dinner; LD: Late Dinner; FL: Front Loading; EED: Equal Energy Distribution; ML: Middle Loading; BL: Back Loading.

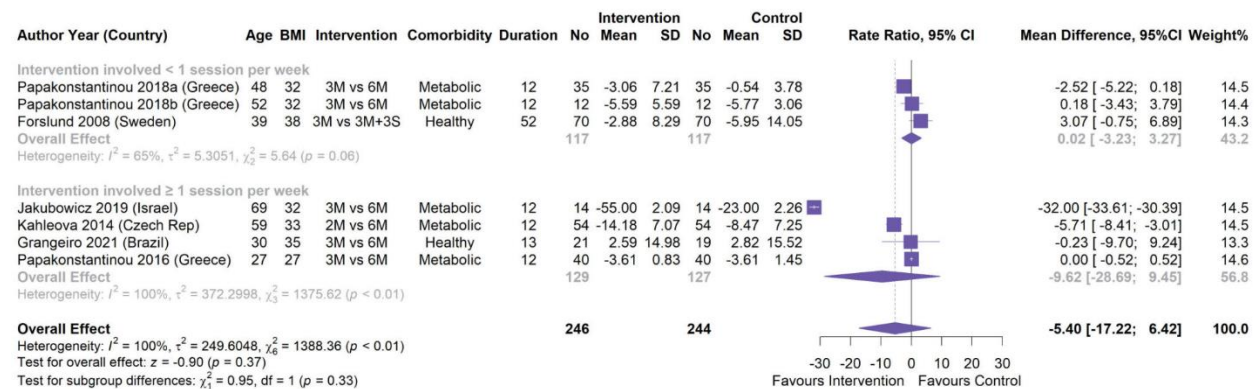

**eFigure 159: Meta-analysis of difference in mean difference (95% CIs) for the effect of meal frequency on fasting glucose (mg/dL), grouped by frequency of contact**

BMI: Body Mass Index; SD: Standard Deviation; CI: Confidence Interval; USA: United States of America; FT: Feeding Time; Duration: follow-up duration in weeks; 2M/3M/6M: 2, 3 or 6 meals; 3M+2S: 3 meals and 2 snacks; 3M+3S: 3 meals and 3 snacks; 10S: Grazing diet – 100kcal every 2-3 hours; HCB: High Calorie Breakfast; HCD: High Calorie Dinner; ED: Early Dinner; LD: Late Dinner; FL: Front Loading; EED: Equal Energy Distribution; ML: Middle Loading; BL: Back Loading.

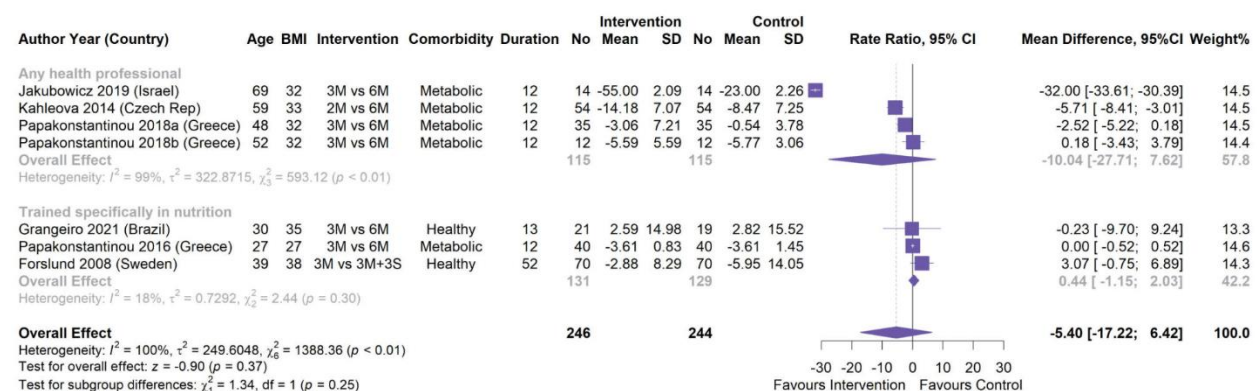

**eFigure 160: Meta-analysis of difference in mean difference (95% CIs) for the effect of meal frequency on fasting glucose (mg/dL), grouped by delivery personnel**

BMI: Body Mass Index; SD: Standard Deviation; CI: Confidence Interval; USA: United States of America; FT: Feeding Time; Duration: follow-up duration in weeks; 2M/3M/6M: 2, 3 or 6 meals; 3M+2S: 3 meals and 2 snacks; 3M+3S: 3 meals and 3 snacks; 10S: Grazing diet – 100kcal every 2-3 hours; HCB: High Calorie Breakfast; HCD: High Calorie Dinner; ED: Early Dinner; LD: Late Dinner; FL: Front Loading; EED: Equal Energy Distribution; ML: Middle Loading; BL: Back Loading.

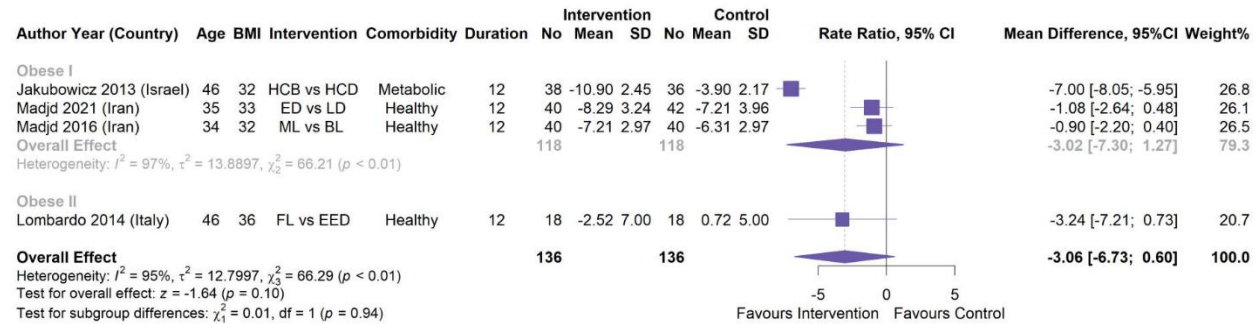

**eFigure 161: Meta-analysis of difference in mean difference (95% CIs) for the effect of meal distribution on fasting glucose (mg/dL), grouped by baseline BMI status**

BMI: Body Mass Index; SD: Standard Deviation; CI: Confidence Interval; USA: United States of America; FT: Feeding Time; Duration: follow-up duration in weeks; 2M/3M/6M: 2, 3 or 6 meals; 3M+2S: 3 meals and 2 snacks; 3M+3S: 3 meals and 3 snacks; 10S: Grazing diet – 100kcal every 2-3 hours; HCB: High Calorie Breakfast; HCD: High Calorie Dinner; ED: Early Dinner; LD: Late Dinner; FL: Front Loading; EED: Equal Energy Distribution; ML: Middle Loading; BL: Back Loading.

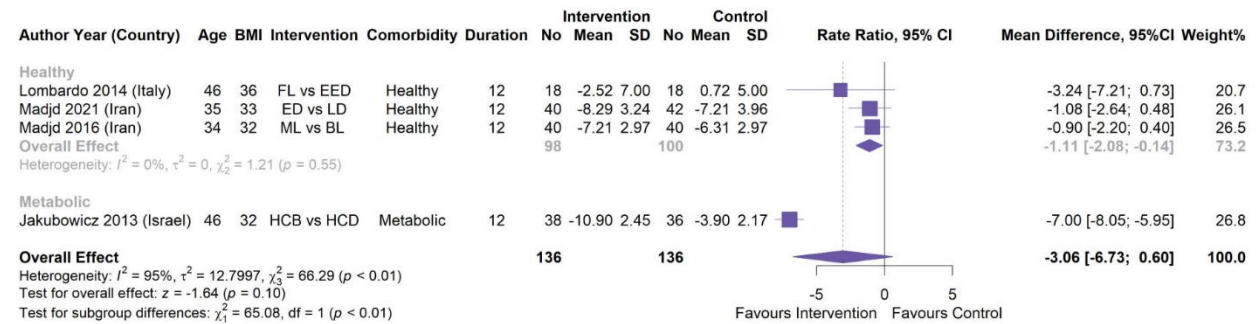

**eFigure 162: Meta-analysis of difference in mean difference (95% CIs) for the effect of meal distribution on fasting glucose (mg/dL), grouped by health status**

BMI: Body Mass Index; SD: Standard Deviation; CI: Confidence Interval; USA: United States of America; FT: Feeding Time; Duration: follow-up duration in weeks; 2M/3M/6M: 2, 3 or 6 meals; 3M+2S: 3 meals and 2 snacks; 3M+3S: 3 meals and 3 snacks; 10S: Grazing diet – 100kcal every 2-3 hours; HCB: High Calorie Breakfast; HCD: High Calorie Dinner; ED: Early Dinner; LD: Late Dinner; FL: Front Loading; EED: Equal Energy Distribution; ML: Middle Loading; BL: Back Loading.

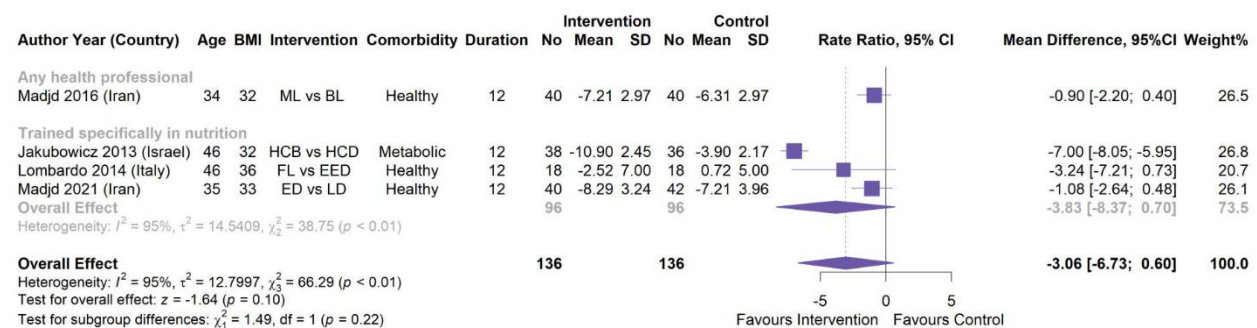

**eFigure 163: Meta-analysis of difference in mean difference (95% CIs) for the effect of meal distribution on fasting glucose (mg/dL), grouped by delivery personnel**

BMI: Body Mass Index; SD: Standard Deviation; CI: Confidence Interval; USA: United States of America; FT: Feeding Time; Duration: follow-up duration in weeks; 2M/3M/6M: 2, 3 or 6 meals; 3M+2S: 3 meals and 2 snacks; 3M+3S: 3 meals and 3 snacks; 10S: Grazing diet – 100kcal every 2-3 hours; HCB: High Calorie Breakfast; HCD: High Calorie Dinner; ED: Early Dinner; LD: Late Dinner; FL: Front Loading; EED: Equal Energy Distribution; ML: Middle Loading; BL: Back Loading.

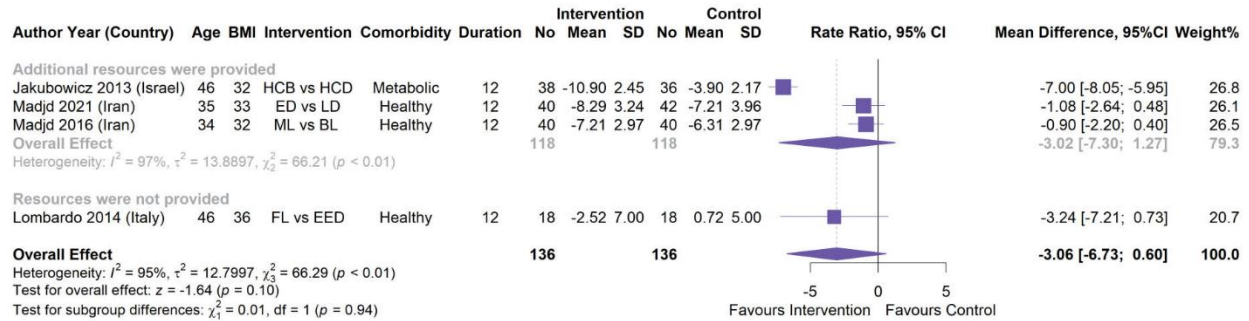

**eFigure 164: Meta-analysis of difference in mean difference (95% CIs) for the effect of meal distribution on fasting glucose (mg/dL), grouped by resource provision**

BMI: Body Mass Index; SD: Standard Deviation; CI: Confidence Interval; USA: United States of America; FT: Feeding Time; Duration: follow-up duration in weeks; 2M/3M/6M: 2, 3 or 6 meals; 3M+2S: 3 meals and 2 snacks; 3M+3S: 3 meals and 3 snacks; 10S: Grazing diet – 100kcal every 2-3 hours; HCB: High Calorie Breakfast; HCD: High Calorie Dinner; ED: Early Dinner; LD: Late Dinner; FL: Front Loading; EED: Equal Energy Distribution; ML: Middle Loading; BL: Back Loading.

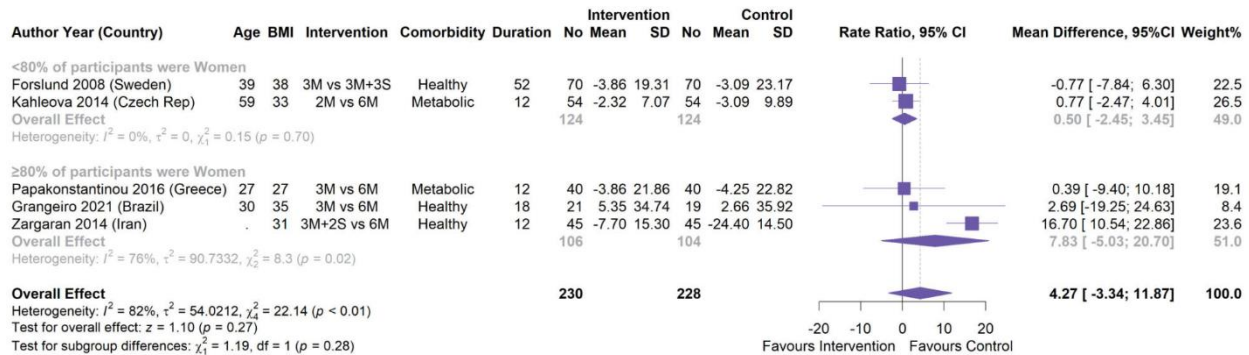

**eFigure 165: Meta-analysis of difference in mean difference (95% CIs) for the effect of meal frequency on LDL (mg/dL), grouped by gender proportion**

BMI: Body Mass Index; SD: Standard Deviation; CI: Confidence Interval; USA: United States of America; FT: Feeding Time; Duration: follow-up duration in weeks; 2M/3M/6M: 2, 3 or 6 meals; 3M+2S: 3 meals and 2 snacks; 3M+3S: 3 meals and 3 snacks; 10S: Grazing diet – 100kcal every 2-3 hours; HCB: High Calorie Breakfast; HCD: High Calorie Dinner; ED: Early Dinner; LD: Late Dinner; FL: Front Loading; EED: Equal Energy Distribution; ML: Middle Loading; BL: Back Loading.

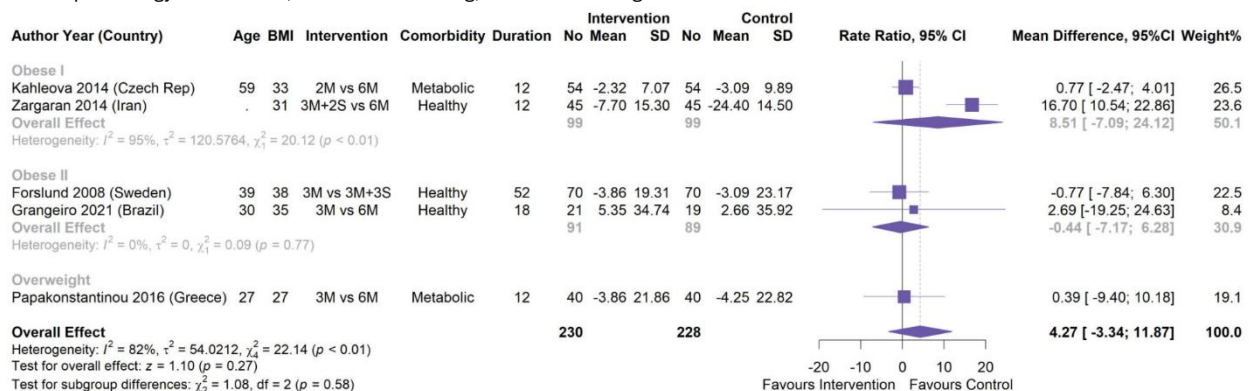

**eFigure 166: Meta-analysis of difference in mean difference (95% CIs) for the effect of meal frequency on LDL (mg/dL), grouped by baseline BMI status**

BMI: Body Mass Index; SD: Standard Deviation; CI: Confidence Interval; USA: United States of America; FT: Feeding Time; Duration: follow-up duration in weeks; 2M/3M/6M: 2, 3 or 6 meals; 3M+2S: 3 meals and 2 snacks; 3M+3S: 3 meals and 3 snacks; 10S: Grazing diet – 100kcal every 2-3 hours; HCB: High Calorie Breakfast; HCD: High Calorie Dinner; ED: Early Dinner; LD: Late Dinner; FL: Front Loading; EED: Equal Energy Distribution; ML: Middle Loading; BL: Back Loading.

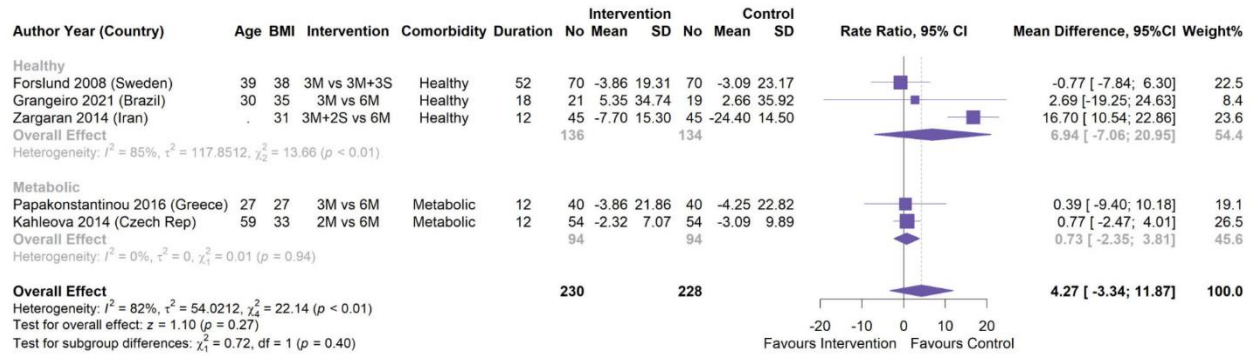

**eFigure 167: Meta-analysis of difference in mean difference (95% CIs) for the effect of meal frequency on LDL (mg/dL), grouped by health status**

BMI: Body Mass Index; SD: Standard Deviation; CI: Confidence Interval; USA: United States of America; FT: Feeding Time; Duration: follow-up duration in weeks; 2M/3M/6M: 2, 3 or 6 meals; 3M+2S: 3 meals and 2 snacks; 3M+3S: 3 meals and 3 snacks; 10S: Grazing diet – 100kcal every 2-3 hours; HCB: High Calorie Breakfast; HCD: High Calorie Dinner; ED: Early Dinner; LD: Late Dinner; FL: Front Loading; EED: Equal Energy Distribution; ML: Middle Loading; BL: Back Loading.

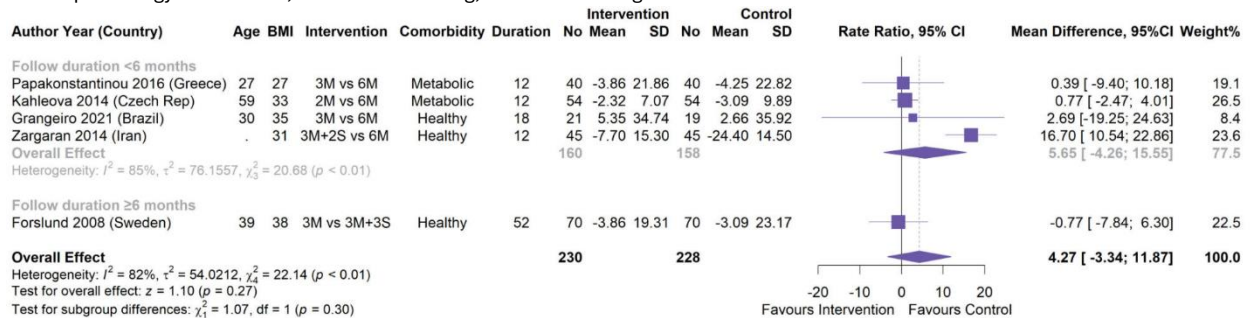

**eFigure 168: Meta-analysis of difference in mean difference (95% CIs) for the effect of meal frequency on LDL (mg/dL), grouped by follow duration**

BMI: Body Mass Index; SD: Standard Deviation; CI: Confidence Interval; USA: United States of America; FT: Feeding Time; Duration: follow-up duration in weeks; 2M/3M/6M: 2, 3 or 6 meals; 3M+2S: 3 meals and 2 snacks; 3M+3S: 3 meals and 3 snacks; 10S: Grazing diet – 100kcal every 2-3 hours; HCB: High Calorie Breakfast; HCD: High Calorie Dinner; ED: Early Dinner; LD: Late Dinner; FL: Front Loading; EED: Equal Energy Distribution; ML: Middle Loading; BL: Back Loading.

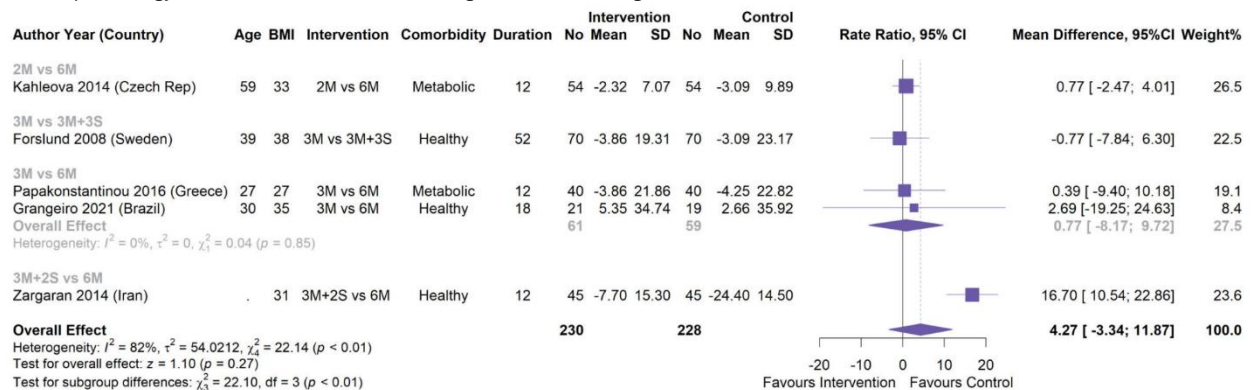

**eFigure 169: Meta-analysis of difference in mean difference (95% CIs) for the effect of meal frequency on LDL (mg/dL), grouped by intervention intensity**

BMI: Body Mass Index; SD: Standard Deviation; CI: Confidence Interval; USA: United States of America; FT: Feeding Time; Duration: follow-up duration in weeks; 2M/3M/6M: 2, 3 or 6 meals; 3M+2S: 3 meals and 2 snacks; 3M+3S: 3 meals and 3 snacks; 10S: Grazing diet – 100kcal every 2-3 hours; HCB: High Calorie Breakfast; HCD: High Calorie Dinner; ED: Early Dinner; LD: Late Dinner; FL: Front Loading; EED: Equal Energy Distribution; ML: Middle Loading; BL: Back Loading.



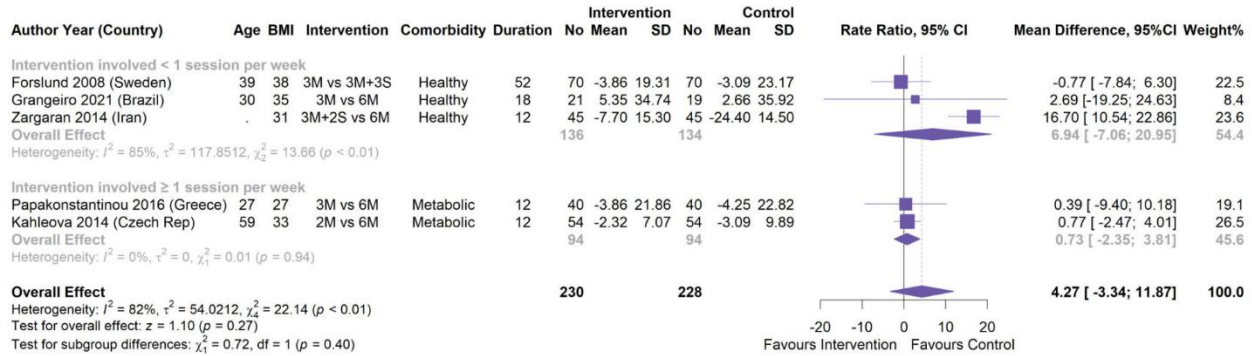

**eFigure 170: Meta-analysis of difference in mean difference (95% CIs) for the effect of meal frequency on LDL (mg/dL), grouped by frequency of contact**

BMI: Body Mass Index; SD: Standard Deviation; CI: Confidence Interval; USA: United States of America; FT: Feeding Time; Duration: follow-up duration in weeks; 2M/3M/6M: 2, 3 or 6 meals; 3M+2S: 3 meals and 2 snacks; 3M+3S: 3 meals and 3 snacks; 10S: Grazing diet – 100kcal every 2-3 hours; HCB: High Calorie Breakfast; HCD: High Calorie Dinner; ED: Early Dinner; LD: Late Dinner; FL: Front Loading; EED: Equal Energy Distribution; ML: Middle Loading; BL: Back Loading.

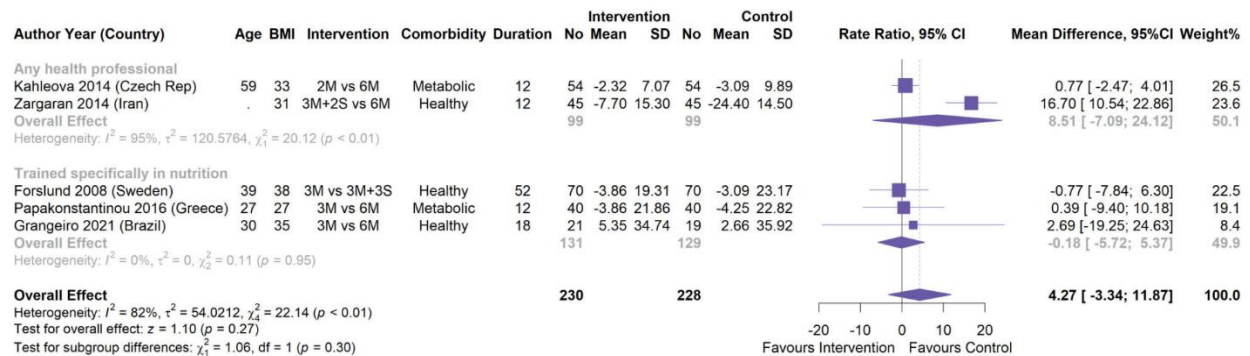

**eFigure 171: Meta-analysis of difference in mean difference (95% CIs) for the effect of meal frequency on LDL (mg/dL), grouped by delivery personnel**

BMI: Body Mass Index; SD: Standard Deviation; CI: Confidence Interval; USA: United States of America; FT: Feeding Time; Duration: follow-up duration in weeks; 2M/3M/6M: 2, 3 or 6 meals; 3M+2S: 3 meals and 2 snacks; 3M+3S: 3 meals and 3 snacks; 10S: Grazing diet – 100kcal every 2-3 hours; HCB: High Calorie Breakfast; HCD: High Calorie Dinner; ED: Early Dinner; LD: Late Dinner; FL: Front Loading; EED: Equal Energy Distribution; ML: Middle Loading; BL: Back Loading.

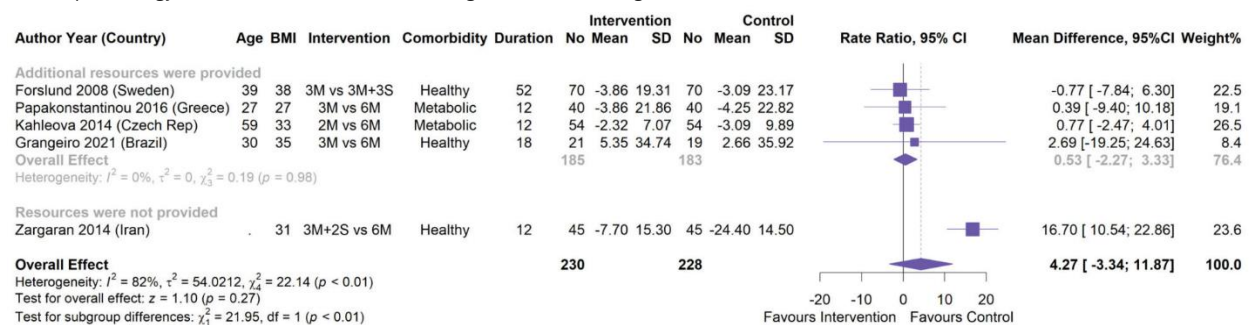

**eFigure 172: Meta-analysis of difference in mean difference (95% CIs) for the effect of meal frequency on LDL (mg/dL), grouped by resource provision**

BMI: Body Mass Index; SD: Standard Deviation; CI: Confidence Interval; USA: United States of America; FT: Feeding Time; Duration: follow-up duration in weeks; 2M/3M/6M: 2, 3 or 6 meals; 3M+2S: 3 meals and 2 snacks; 3M+3S: 3 meals and 3 snacks; 10S: Grazing diet – 100kcal every 2-3 hours; HCB: High Calorie Breakfast; HCD: High Calorie Dinner; ED: Early Dinner; LD: Late Dinner; FL: Front Loading; EED: Equal Energy Distribution; ML: Middle Loading; BL: Back Loading.

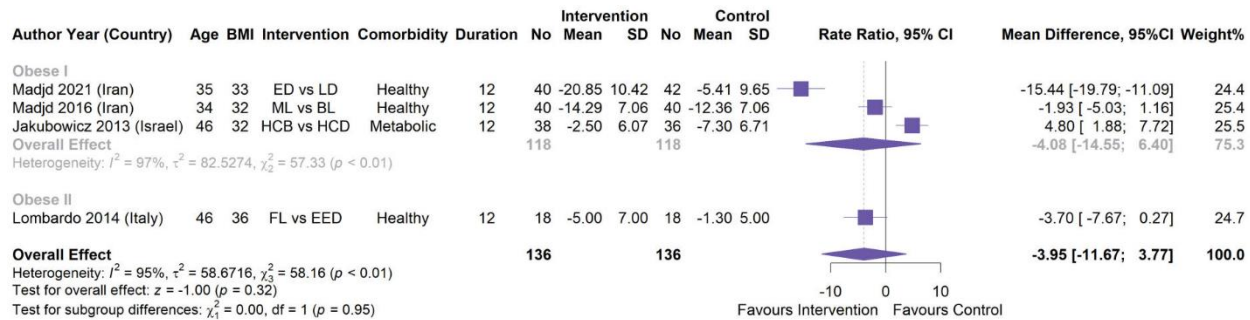

**eFigure 173: Meta-analysis of difference in mean difference (95% CIs) for the effect of meal distribution on LDL (mg/dL), grouped by baseline BMI status**

BMI: Body Mass Index; SD: Standard Deviation; CI: Confidence Interval; USA: United States of America; FT: Feeding Time; Duration: follow-up duration in weeks; 2M/3M/6M: 2, 3 or 6 meals; 3M+2S: 3 meals and 2 snacks; 3M+3S: 3 meals and 3 snacks; 10S: Grazing diet – 100kcal every 2-3 hours; HCB: High Calorie Breakfast; HCD: High Calorie Dinner; ED: Early Dinner; LD: Late Dinner; FL: Front Loading; EED: Equal Energy Distribution; ML: Middle Loading; BL: Back Loading.

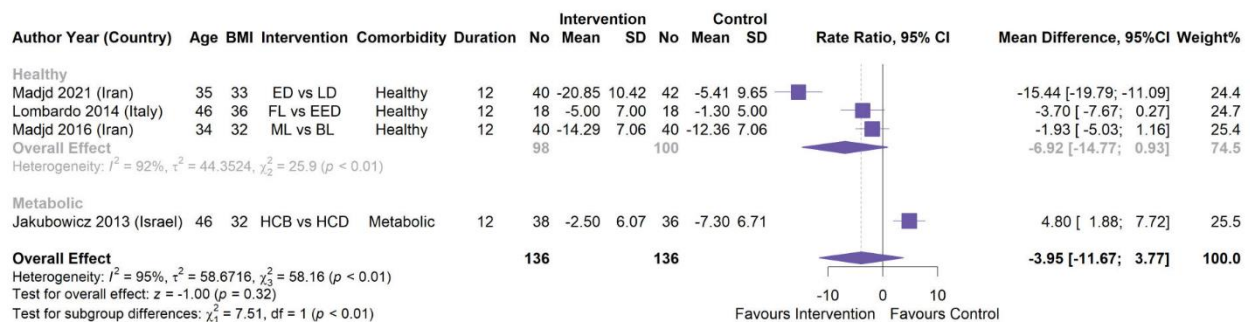

**eFigure 174: Meta-analysis of difference in mean difference (95% CIs) for the effect of meal distribution on LDL (mg/dL), grouped by health status**

BMI: Body Mass Index; SD: Standard Deviation; CI: Confidence Interval; USA: United States of America; FT: Feeding Time; Duration: follow-up duration in weeks; 2M/3M/6M: 2, 3 or 6 meals; 3M+2S: 3 meals and 2 snacks; 3M+3S: 3 meals and 3 snacks; 10S: Grazing diet – 100kcal every 2-3 hours; HCB: High Calorie Breakfast; HCD: High Calorie Dinner; ED: Early Dinner; LD: Late Dinner; FL: Front Loading; EED: Equal Energy Distribution; ML: Middle Loading; BL: Back Loading.

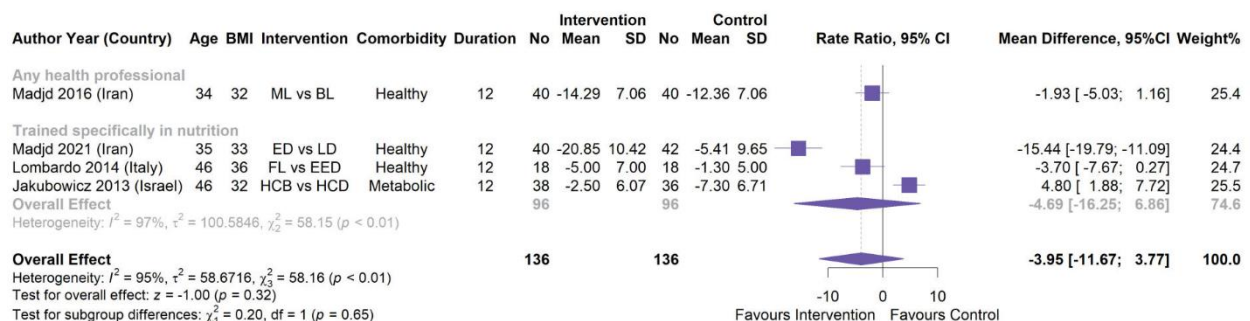

**eFigure 175: Meta-analysis of difference in mean difference (95% CIs) for the effect of meal distribution on LDL (mg/dL), grouped by delivery personnel**

BMI: Body Mass Index; SD: Standard Deviation; CI: Confidence Interval; USA: United States of America; FT: Feeding Time; Duration: follow-up duration in weeks; 2M/3M/6M: 2, 3 or 6 meals; 3M+2S: 3 meals and 2 snacks; 3M+3S: 3 meals and 3 snacks; 10S: Grazing diet – 100kcal every 2-3 hours; HCB: High Calorie Breakfast; HCD: High Calorie Dinner; ED: Early Dinner; LD: Late Dinner; FL: Front Loading; EED: Equal Energy Distribution; ML: Middle Loading; BL: Back Loading.

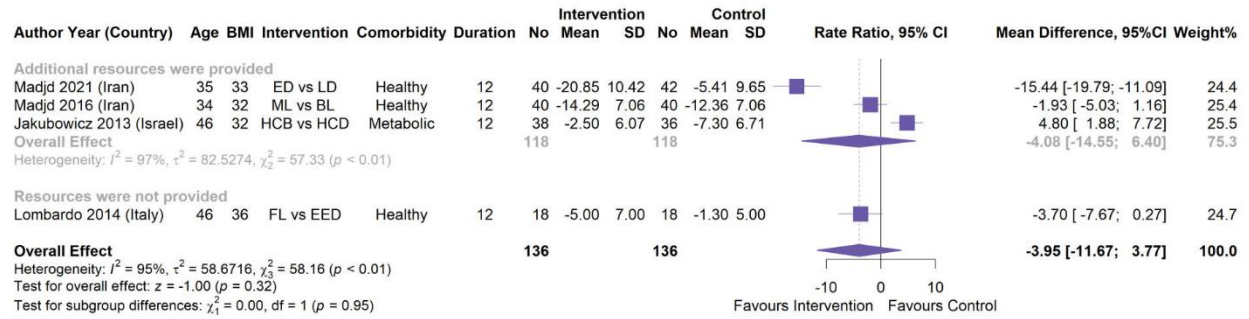

**eFigure 176: Meta-analysis of difference in mean difference (95% CIs) for the effect of meal distribution on LDL (mg/dL), grouped by resource provision**

BMI: Body Mass Index; SD: Standard Deviation; CI: Confidence Interval; USA: United States of America; FT: Feeding Time; Duration: follow-up duration in weeks; 2M/3M/6M: 2, 3 or 6 meals; 3M+2S: 3 meals and 2 snacks; 3M+3S: 3 meals and 3 snacks; 10S: Grazing diet – 100kcal every 2-3 hours; HCB: High Calorie Breakfast; HCD: High Calorie Dinner; ED: Early Dinner; LD: Late Dinner; FL: Front Loading; EED: Equal Energy Distribution; ML: Middle Loading; BL: Back Loading.

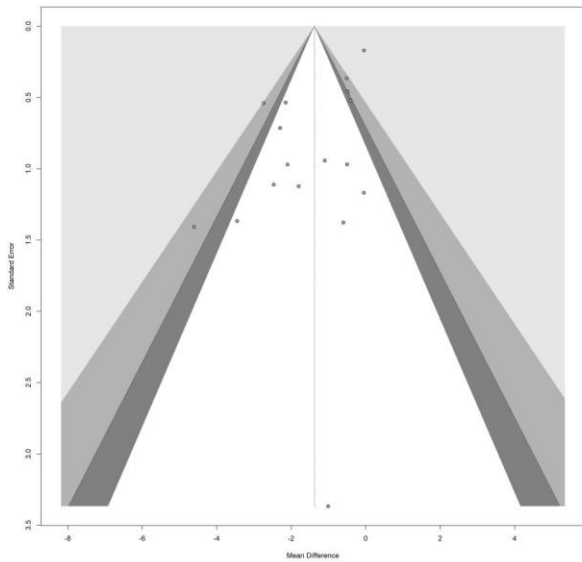

**eFigure 177: Funnel plots for weight (TRE vs control)**

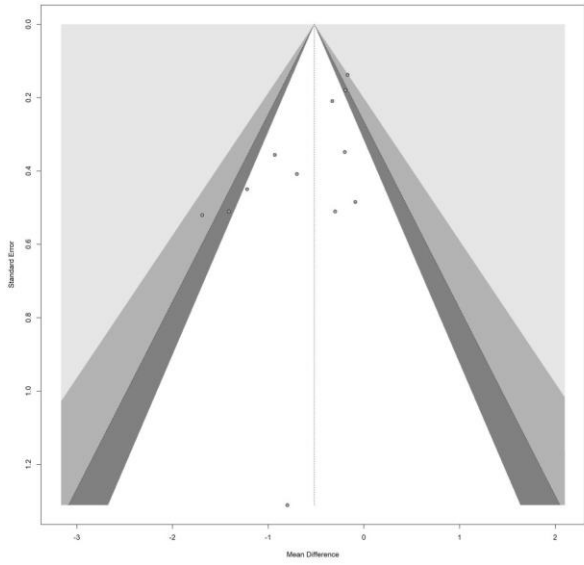

**eFigure 178: Funnel plots for BMI (TRE vs control)**

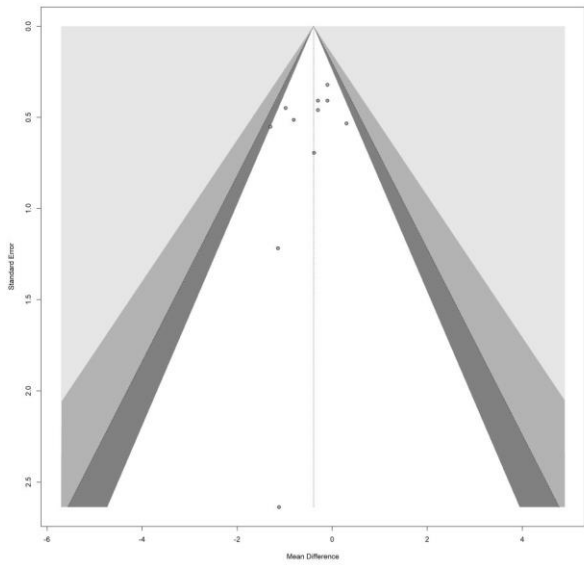

**eFigure 179: Funnel plots for lean mass (TRE vs control)**

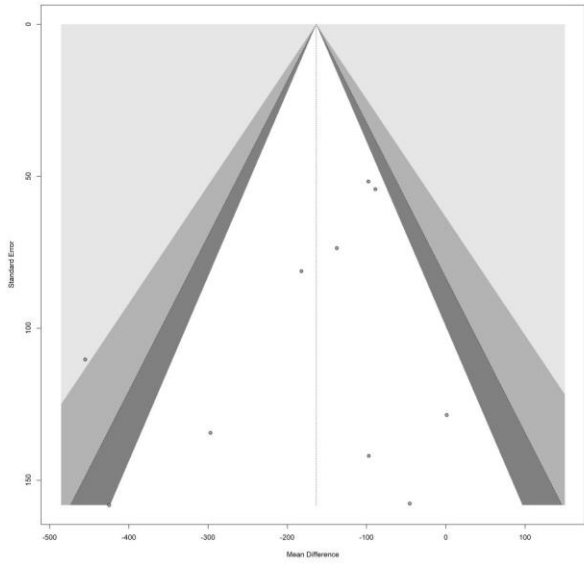

**eFigure 180: Funnel plots for energy intake (TRE vs control)**

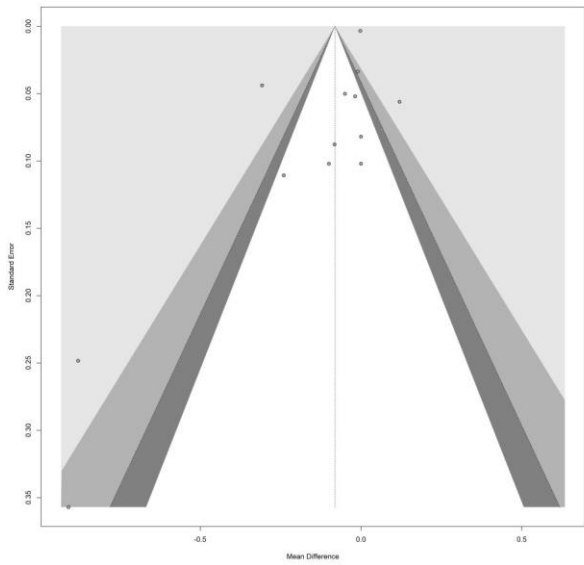

**eFigure 181: Funnel plots for HbA1c (TRE vs control)**

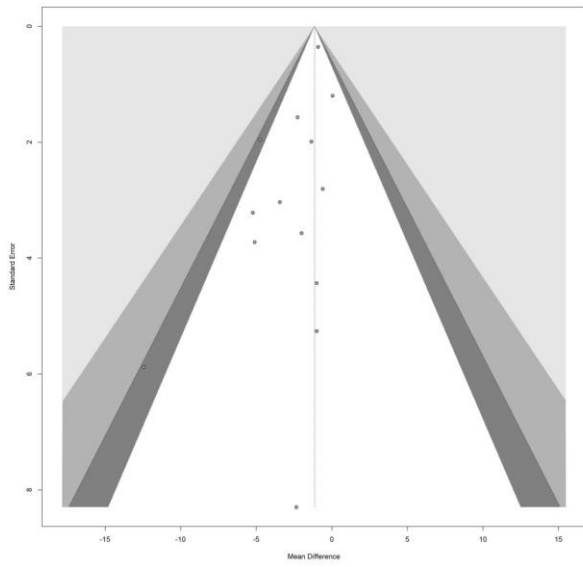

**eFigure 182: Funnel plots for fasting glucose (TRE vs control)**

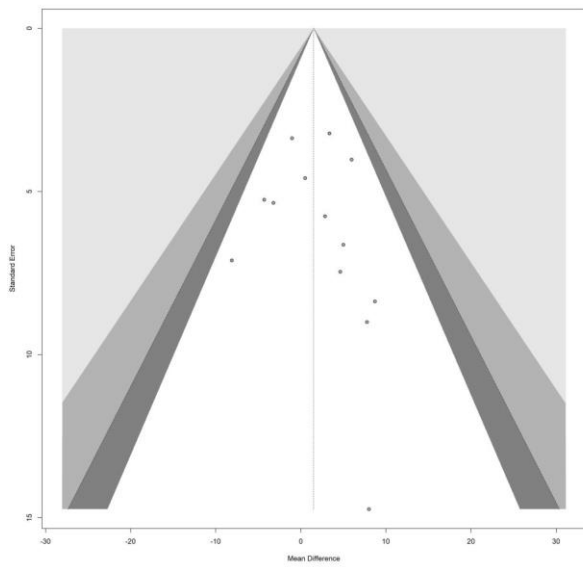

**eFigure 183: Funnel plots for LDL (TRE vs control)**

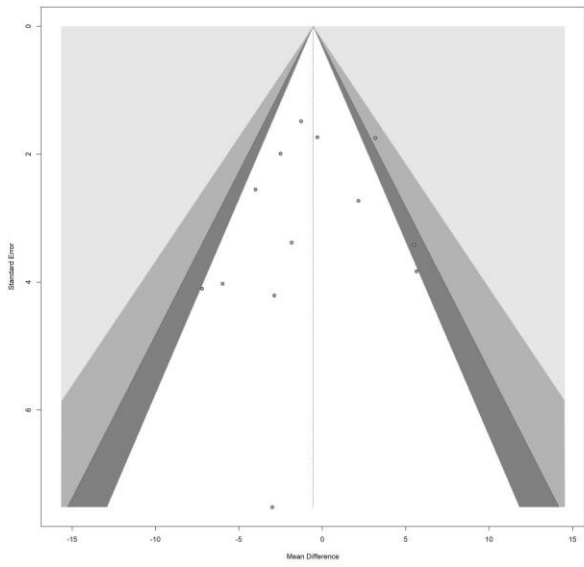

**eFigure 184: Funnel plots for systolic blood pressure (TRE vs control)**

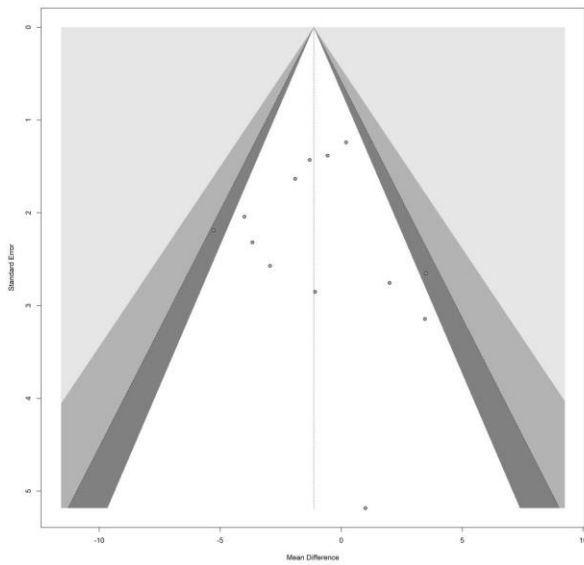

**eFigure 185: Funnel plots for diastolic blood pressure (TRE vs control)**
