# Supplementary material for: Meal Timing and Anthropometric and Metabolic Outcomes: A Systematic Review and Meta-Analysis
Source: PubMed Central journal article supplement (PMC11530941; doi:10.1001/jamanetworkopen.2024.42163), 2024-11-01
Supplement: jamanetwopen-e2442163-s002.pdf [file jamanetwopen-e2442163-s002.pdf]

## Data Sharing Statement

Liu. Meal Timing and Anthropometric and Metabolic Outcomes. *JAMA Netw Open*. Published November 01, 2024. doi:10.1001/jamanetworkopen.2024.42163

### Data

**Data available:** Yes

**Data types:** Data (not involving human participants)

**How to access data:** extracted data from included studies

**When available:** With publication

### Supporting Documents

**Document types:** None

### Additional Information

**Who can access the data:** upon reasonable request from the corresponding author

**Types of analyses:** upon reasonable request from the corresponding author

**Mechanisms of data availability:** upon reasonable request from the corresponding author
